# Supplementary material for: Facile synthesis of multisubstituted 2,3-dihydrofurans via intermolecular cyclization of enals or alkyl/aryl aldehydes with acyl-stabilized sulfur ylides
Source: Royal Society of Chemistry journal article supplement (doi:10.1039/d5cc06219e), 2025-12-23

*Supporting Information*

*for*

**Facile Synthesis of Multisubstituted 2,3-Dihydrofurans  
via Intermolecular Cyclization of Enals or Alkyl/Aryl  
Aldehydes with Acyl-Stabilized Sulfur Ylides**

Yin Su, Ziyi Sun, Quansheng Zhao\* and Liang Fu\*

*Key Laboratory of Functional Molecular Solids, Ministry of Education, Anhui Laboratory of  
Molecule-Based Materials, College of Chemistry and Materials Science, Anhui Normal  
University, Wuhu 241002, P. R. China*

*Email: [liangfu-chem@ahnu.edu.cn](mailto:liangfu-chem@ahnu.edu.cn)*

Table of Contents

---

|                                                                                |     |
|--------------------------------------------------------------------------------|-----|
| 1. General.....                                                                | S2  |
| 2. Synthesis of Acyl-Stabilized Sulfur Ylides <b>1a-1j</b> .....               | S2  |
| 3. General Procedure for the synthesis of 2,3-Dihydrofurans.....               | S2  |
| 4. Optimization of the Reaction Conditions .....                               | S3  |
| 5. General Procedure for the One-Pot Synthesis of Multisubstituted Furans..... | S6  |
| 6. Gram-Scale Reaction.....                                                    | S6  |
| 7. Evaluation of Biologically Active 2,3-Dihydrofurans.....                    | S7  |
| 8. Mechanistic Studies .....                                                   | S9  |
| 9. Product Characterization .....                                              | S11 |
| 10. Single Crystal X-Ray Diffraction Data ( <b>9</b> and <b>53</b> ) .....     | S31 |
| 11. References .....                                                           | S33 |
| 12. NMR Spectra of Products .....                                              | S34 |

## 1. General

All commercially available compounds were purchased from Aldrich, Alfa Aesar or Adamas. NMR spectra were recorded on Bruker 400 (400 MHz for  $^1\text{H}$ , 376 MHz for  $^{19}\text{F}$ , 162 MHz for  $^{31}\text{P}$  and 100 MHz for  $^{13}\text{C}$ ) spectrometer. Chemical shifts ( $\delta$ ) are given in parts per million relative to  $\text{CDCl}_3$  (7.26 ppm for  $^1\text{H}$  and 77.0 ppm for  $^{13}\text{C}$ ) to internal TMS ( $\delta = 0$  ppm) as an internal standard. High-resolution mass spectra (HRMS) were performed on Shimadzu LCMS-9030, using a quadrupole time-of-flight mass spectrometer equipped with an ESI source. Single-crystal data were performed on the Bruker D8 Venture single-crystal X-ray diffractometer. Infrared spectra were recorded on a Perkin-Elmer Spectrum 100 Series FTIR spectrometer as KBr plates. Melting points (uncorrected) were determined on a Thomas-Hoover capillary melting point apparatus. Flash column chromatography was performed on silica gel (particle size 200-300 mesh, purchased from Shandong) and eluted with petroleum ether/ethyl acetate. Solvent was purified according to the procedure from a book named "Purification of Laboratory Chemicals".

## 2. Synthesis of Acyl-Stabilized Sulfur Ylides 1a-1j

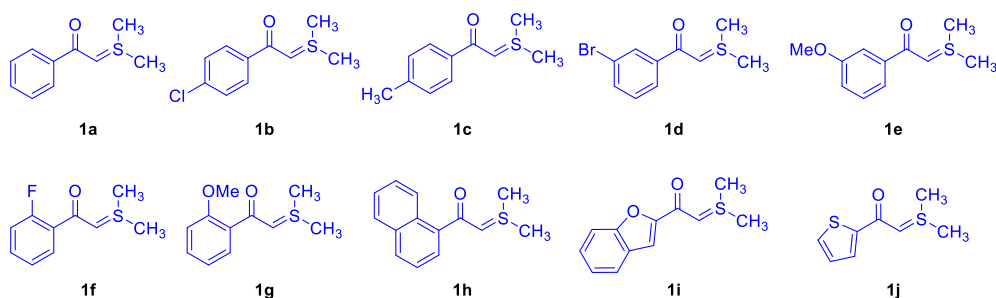

Acyl-stabilized sulfur ylides **1a-j** were prepared according to the literatures.<sup>[S1]</sup>

## 3. General Procedure for the Synthesis of 2,3-Dihydrofurans

Conditions A for the intermolecular cyclization of alkyl aldehydes with acyl-stabilized sulfur ylides:

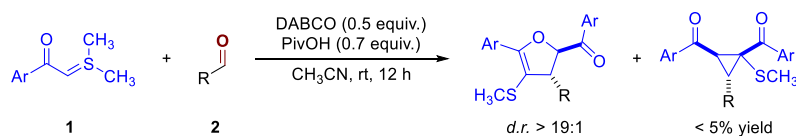

In a 25 mL one-necked round bottom flask equipped with a stirring bar, butyraldehyde **2a** (43.3mg, 0.6 mmol), DABCO (56.1 mg, 0.5 mmol) and PivOH (71.5 mg, 0.7 mmol) were dissolved in  $\text{CH}_3\text{CN}$  (1.0 mL), and the mixture was stirred at room temperature for 1 h. Then, phenacyl sulfur ylide **1a** (180.3 mg, 1.0 mmol) was added to the mixture, and the reaction mixture was stirred at room temperature for 12 h. The reaction was quenched by a short pad of silica gel with a gradient eluent of petroleum ether and ethyl acetate (PE/EA = 2:1), solvent was removed under vacuum. The residue was purified by column chromatography on silica gel

(PE/EA = 200:1 to 80:1) to yield product **3** (150.6 mg, 89% yield, *d.r.* > 19:1) as yellow oil. The diastereoselective ratio (*d.r.* > 19:1) was determined by <sup>1</sup>H NMR spectroscopy of the crude mixture.

Conditions B for the intermolecular cyclization of enals with acyl-stabilized sulfur ylides:

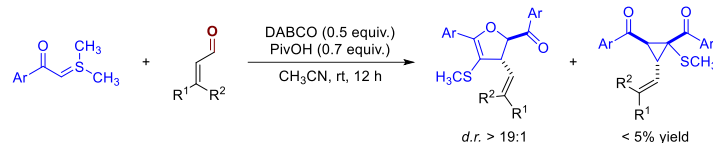

In a 25 mL one-necked round bottom flask equipped with a stirring bar,  $\beta,\beta$ -dimethylacrolein (50.4 mg, 0.6 mmol), DABCO (56.1 mg, 0.5 mmol) and PivOH (71.5 mg, 0.7 mmol) were dissolved in CH<sub>3</sub>CN (1.0 mL), and the mixture was stirred at room temperature for 1 h. Then, phenacyl sulfur ylide **1a** (180.3 mg, 1.0 mmol) was added to the mixture, and the reaction mixture was stirred at room temperature for 12 h. The reaction was quenched by a short pad of silica gel with a gradient eluent of petroleum ether and ethyl acetate (PE/EA = 2:1), solvent was removed under vacuum. The residue was purified by column chromatography on silica gel (PE/EA = 80:1 to 60:1) to yield product **13** (119.4 mg, 68% yield, *d.r.* > 19:1) as a yellow solid. The diastereoselective ratio (*d.r.* > 19:1) was determined by <sup>1</sup>H NMR spectroscopy of the crude mixture.

Conditions C for the intermolecular cyclization of aryl aldehydes with acyl-stabilized sulfur ylides:

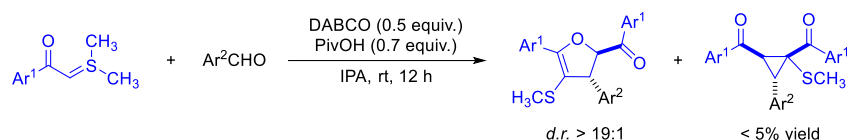

In a 25 mL one-necked round bottom flask equipped with a stirring bar, 4-bromobenzaldehyde (110.4 mg, 0.6 mmol), DABCO (56.1 mg, 0.5 mmol) and PivOH (71.5 mg, 0.7 mmol) were dissolved in isopropyl alcohol (1.0 mL), and the mixture was stirred at room temperature for 1 h. Then, phenacyl sulfur ylide **1a** (180.3 mg, 1.0 mmol) was added to the mixture, and the reaction mixture was stirred at room temperature for 12 h. The reaction was quenched by a short pad of silica gel with a gradient eluent of petroleum ether and ethyl acetate (PE/EA = 1:1), solvent was removed under vacuum. The residue was purified by column chromatography on silica gel (PE/Et<sub>2</sub>O = 80:1 to 40:1) to yield product **18** (144.3 mg, 64% yield, *d.r.* > 19:1) as a light yellow solid. The diastereoselective ratio (*d.r.* > 19:1) was determined by <sup>1</sup>H NMR spectroscopy of the crude mixture.

#### 4. Optimization of the Reaction Conditions

Table S1. Evaluation of various bases.<sup>a,b</sup>

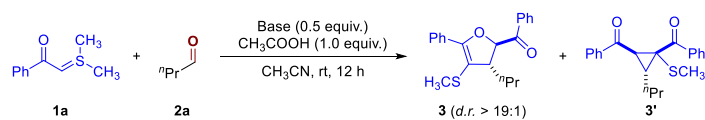

| Entry    | Base                            | Yield of <b>3</b> | Yield of <b>3'</b> |
|----------|---------------------------------|-------------------|--------------------|
| 1        | EtNH <sub>2</sub>               | 2%                | 4%                 |
| 2        | Et <sub>3</sub> N               | 21%               | 4%                 |
| 3        | DIPA                            | 3%                | 4%                 |
| 4        | pyridine                        | 0%                | 6%                 |
| 5        | 2,6-lutidine                    | 0%                | 12%                |
| 6        | DMAP                            | 16%               | 4%                 |
| 7        | TMG                             | 30%               | 0%                 |
| 8        | DBU                             | 31%               | 0%                 |
| <b>9</b> | <b>DABCO</b>                    | <b>56%</b>        | <b>28%</b>         |
| 10       | <sup>t</sup> BuOK               | 19%               | 3%                 |
| 11       | CH <sub>3</sub> COONa           | 0%                | 9%                 |
| 12       | Na <sub>2</sub> CO <sub>3</sub> | 0%                | 2%                 |
| 13       | K <sub>2</sub> CO <sub>3</sub>  | 6%                | 2%                 |
| 14       | Cs <sub>2</sub> CO <sub>3</sub> | 34%               | 0%                 |
| 15       | KOH                             | 4%                | 1%                 |
| 16       | NaOH                            | 1%                | 3%                 |

<sup>a</sup> Reaction conditions: base (0.5 mmol), phenacyl sulfur ylide **1a** (1.0 mmol), butyraldehyde **2a** (2.0 mmol) and CH<sub>3</sub>COOH (1.0 mmol) in CH<sub>3</sub>CN (1.0 mL) under air at rt for 12 h. <sup>b</sup> <sup>1</sup>H NMR yields using CH<sub>2</sub>Br<sub>2</sub> as an internal standard and the diastereoselective ratio (*d.r.* > 19:1) was determined by <sup>1</sup>H NMR spectroscopy of the crude mixture.

Table S2. Evaluation of various acids.<sup>a,b</sup>

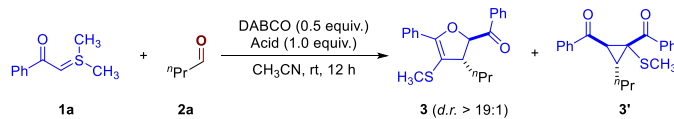

| Entry    | Acid                           | Yield of <b>3</b> | Yield of <b>3'</b> |
|----------|--------------------------------|-------------------|--------------------|
| 1        | CH <sub>3</sub> COOH           | 56%               | 28%                |
| 2        | <sup>n</sup> PrCOOH            | 58%               | 22%                |
| 3        | <sup>n</sup> HexCOOH           | 63%               | 18%                |
| <b>4</b> | <b>PivOH</b>                   | <b>68%</b>        | <b>5%</b>          |
| 5        | CF <sub>3</sub> COOH           | 0%                | 57%                |
| 6        | PTSA·H <sub>2</sub> O          | 0%                | 56%                |
| 7        | PhCOOH                         | 50%               | 35%                |
| 8        | 4-bromophenylacetic acid       | 46%               | 40%                |
| 9        | L-Proline                      | 51%               | 19%                |
| 10       | CSA                            | 0%                | 87%                |
| 11       | HCl                            | 0%                | 45%                |
| 12       | H <sub>2</sub> SO <sub>4</sub> | 37%               | 28%                |

<sup>a</sup> Reaction conditions: acid (1.0 mmol), phenacyl sulfur ylide **1a** (1.0 mmol), butyraldehyde **2a** (2.0 mmol) and DABCO (0.5 mmol) in CH<sub>3</sub>CN (1.0 mL) under air at rt for 12 h. <sup>b</sup> <sup>1</sup>H NMR yields using CH<sub>2</sub>Br<sub>2</sub> as an internal standard and the diastereoselective ratio (*d.r.* > 19:1) was determined by <sup>1</sup>H NMR spectroscopy of the crude mixture.

Table S3. Evaluation of various solvents.<sup>a,b</sup>

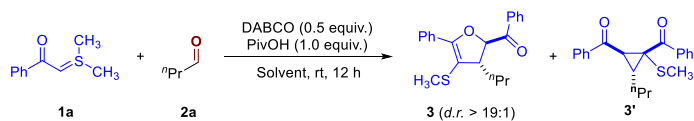

| Entry    | Solvent                 | Yield of <b>3</b> | Yield of <b>3'</b> |
|----------|-------------------------|-------------------|--------------------|
| <b>1</b> | <b>CH<sub>3</sub>CN</b> | <b>68%</b>        | <b>5%</b>          |
| 2        | acetone                 | 59%               | 3%                 |
| 3        | THF                     | 30%               | 3%                 |
| 4        | MTBE                    | 37%               | 6%                 |
| 5        | CHCl <sub>3</sub>       | 28%               | 8%                 |
| 6        | CCl <sub>4</sub>        | 24%               | 11%                |
| 7        | DCE                     | 45%               | 11%                |
| 8        | DMF                     | 31%               | 13%                |
| 9        | toluene                 | 47%               | 20%                |
| 10       | CH <sub>3</sub> OH      | 13%               | 30%                |
| 11       | EtOH                    | 39%               | 10%                |
| 12       | IPA                     | 57%               | 4%                 |
| 13       | HFIP                    | 0%                | 10%                |
| 14       | TFE                     | 13%               | 29%                |

<sup>a</sup> Reaction conditions: DABCO (0.5 mmol), phenacyl sulfur ylide **1a** (1.0 mmol), butyraldehyde **2a** (2.0 mmol) and PivOH (1.0 mmol) in solvent (1.0 mL) under air at rt for 12 h. <sup>b</sup> <sup>1</sup>H NMR yields using CH<sub>2</sub>Br<sub>2</sub> as an internal standard and the diastereoselective ratio (*d.r.* > 19:1) was determined by <sup>1</sup>H NMR spectroscopy of the crude mixture.

Table S4. Evaluation of the reaction concentration.<sup>a,b</sup>

| <b>1a</b> | <b>2a</b>                 | <b>3</b> ( <i>d.r.</i> > 19:1) | <b>3'</b>          |
|-----------|---------------------------|--------------------------------|--------------------|
| Entry     | CH <sub>3</sub> CN (X mL) | Yield of <b>3</b>              | Yield of <b>3'</b> |
| 1         | 0.5 mL                    | 61%                            | 5%                 |
| <b>2</b>  | <b>1.0 mL</b>             | <b>68%</b>                     | <b>5%</b>          |
| 3         | 2.0 mL                    | 64%                            | 5%                 |
| 4         | 4.0 mL                    | 61%                            | 6%                 |

<sup>a</sup> Reaction conditions: DABCO (0.5 mmol), phenacyl sulfur ylide **1a** (1.0 mmol), butyraldehyde **2a** (2.0 mmol) and PivOH (1.0 mmol) in CH<sub>3</sub>CN (X mL) under air at rt for 12 h. <sup>b</sup> <sup>1</sup>H NMR yields using CH<sub>2</sub>Br<sub>2</sub> as an internal standard and the diastereoselective ratio (*d.r.* > 19:1) was determined by <sup>1</sup>H NMR spectroscopy of the crude mixture.

Table S5. Evaluation of the equivalent of pivalic acid.<sup>a,b</sup>

| <b>1a</b> | <b>2a</b>         | <b>3</b> ( <i>d.r.</i> > 19:1) | <b>3'</b>          |
|-----------|-------------------|--------------------------------|--------------------|
| Entry     | PivOH (X equiv.)  | Yield of <b>3</b>              | Yield of <b>3'</b> |
| 1         | -----             | 7%                             | 9%                 |
| 2         | 0.05 equiv.       | 25%                            | 12%                |
| 3         | 0.1 equiv.        | 36%                            | 2%                 |
| 4         | 0.2 equiv.        | 54%                            | 4%                 |
| 5         | 0.3 equiv.        | 58%                            | 5%                 |
| 6         | 0.4 equiv.        | 67%                            | 5%                 |
| 7         | 0.5 equiv.        | 70%                            | 5%                 |
| 8         | 0.6 equiv.        | 73%                            | 6%                 |
| <b>9</b>  | <b>0.7 equiv.</b> | <b>75%</b>                     | <b>6%</b>          |
| 10        | 0.8 equiv.        | 72%                            | 5%                 |
| 11        | 1.0 equiv.        | 68%                            | 5%                 |

<sup>a</sup> Reaction conditions: DABCO (0.5 mmol), phenacyl sulfur ylide **1a** (1.0 mmol), butyraldehyde **2a** (2.0 mmol) and PivOH (X mmol) in CH<sub>3</sub>CN (1.0 mL) under air at rt for 12 h. <sup>b</sup> <sup>1</sup>H NMR yields using CH<sub>2</sub>Br<sub>2</sub> as an internal standard and the diastereoselective ratio (*d.r.* > 19:1) was determined by <sup>1</sup>H NMR spectroscopy of the crude mixture.

Table S6. Evaluation of the equivalent of aldehyde **2a**.<sup>a,b</sup>

| <b>1a</b> | <b>2a</b> (X equiv.) | <b>3</b> ( <i>d.r.</i> > 19:1) | <b>3'</b>          |
|-----------|----------------------|--------------------------------|--------------------|
| Entry     | <b>2a</b> (X equiv.) | Yield of <b>3</b>              | Yield of <b>3'</b> |
| 1         | 0.2 equiv.           | 31%                            | 2%                 |
| 2         | 0.4 equiv.           | 72%                            | 5%                 |
| 3         | 0.5 equiv.           | 80%                            | 4%                 |
| <b>4</b>  | <b>0.6 equiv.</b>    | <b>90%</b>                     | <b>4%</b>          |
| 5         | 0.7 equiv.           | 86%                            | 4%                 |
| 6         | 0.8 equiv.           | 87%                            | 3%                 |
| 7         | 1.0 equiv.           | 78%                            | 3%                 |
| 8         | 1.2 equiv.           | 76%                            | 5%                 |
| 9         | 1.4 equiv.           | 76%                            | 6%                 |
| 10        | 2.0 equiv.           | 75%                            | 5%                 |

<sup>a</sup> Reaction conditions: DABCO (0.5 mmol), phenacyl sulfur ylide **1a** (1.0 mmol), butyraldehyde **2a** (X mmol) and PivOH (0.7 mmol) in CH<sub>3</sub>CN (1.0 mL) under air at rt for 12 h. <sup>b</sup> <sup>1</sup>H NMR yields using CH<sub>2</sub>Br<sub>2</sub> as an internal standard and the diastereoselective ratio (*d.r.* > 19:1) was determined by <sup>1</sup>H NMR spectroscopy of the crude mixture.

Table S7. Evaluation of the equivalent of DABCO.<sup>a,b</sup>

|           |                   | DABCO (X equiv.)<br>PivOH (0.7 equiv.)<br>CH <sub>3</sub> CN, rt, 12 h |                                |           |
|-----------|-------------------|------------------------------------------------------------------------|--------------------------------|-----------|
| <b>1a</b> | <b>2a</b>         |                                                                        | <b>3</b> ( <i>d.r.</i> > 19:1) | <b>3'</b> |
| Entry     | DABCO (X equiv.)  | Yield of <b>3</b>                                                      | Yield of <b>3'</b>             |           |
| 1         | -----             | 10%                                                                    | 7%                             |           |
| 2         | 0.1 equiv.        | 38%                                                                    | 4%                             |           |
| 3         | 0.2 equiv.        | 53%                                                                    | 5%                             |           |
| 4         | 0.3 equiv.        | 65%                                                                    | 6%                             |           |
| 5         | 0.4 equiv.        | 82%                                                                    | 5%                             |           |
| <b>6</b>  | <b>0.5 equiv.</b> | <b>90%</b>                                                             | <b>4%</b>                      |           |
| 7         | 0.6 equiv.        | 85%                                                                    | 5%                             |           |
| 8         | 0.7 equiv.        | 79%                                                                    | 6%                             |           |
| 9         | 0.8 equiv.        | 75%                                                                    | 6%                             |           |
| 10        | 0.9 equiv.        | 74%                                                                    | 5%                             |           |
| 11        | 1.0 equiv.        | 74%                                                                    | 6%                             |           |

<sup>a</sup> Reaction conditions: DABCO (X equiv.), phenacyl sulfur ylide **1a** (1.0 mmol), butyraldehyde **2a** (0.6 mmol) and PivOH (0.7 mmol) in CH<sub>3</sub>CN (1.0 mL) under air at rt for 12 h. <sup>b</sup> <sup>1</sup>H NMR yields using CH<sub>2</sub>Br<sub>2</sub> as an internal standard and the diastereoselective ratio (*d.r.* > 19:1) was determined by <sup>1</sup>H NMR spectroscopy of the crude mixture.

## 5. General Procedure for the One-Pot Synthesis of Multisubstituted Furans

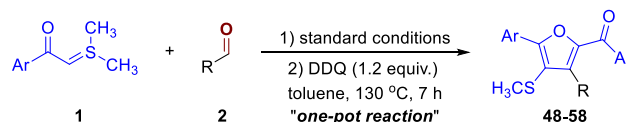

After the intermolecular cyclization of enals or alkyl/aryl aldehydes with acyl-stabilized sulfur ylides (on a 1 mmol scale) was completed, CH<sub>3</sub>CN or IPA as solvent was directly removed under vacuum. Then, to a solution of the resulting residue in toluene (2 mL) was added 2,3-dichloro-5,6-dicyano-1,4-benzoquinone (DDQ) (272.4 mg, 1.2 mmol), the reaction mixture was heated up to 130 °C for 7 h. After reaction completion and cooling down to room temperature, the reaction mixture was quenched by a short pad of silica gel with a gradient eluent of petroleum ether and ethyl acetate (PE/EA = 1:1), solvent was removed under vacuum. The residue was purified by column chromatography on silica gel to yield products **48-58** as shown in Scheme 2.

## 6. Gram-Scale Reaction

### 6.1 Gram-Scale Synthesis of 2,3-Dihydrofuran **18**

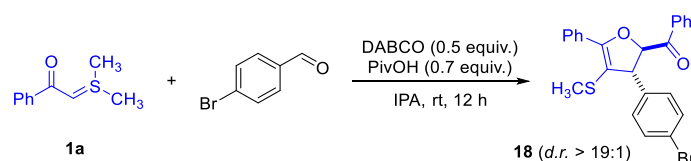

In a 50 mL one-necked round bottom flask equipped with a stirring bar, 4-bromobenzaldehyde (1.01 g, 6.0 mmol), DABCO (560.9 mg, 5.0 mmol) and PivOH (715.0 mg, 7.0 mmol) were dissolved in IPA (10.0 mL), and the mixture was stirred at room temperature for 1 h. Then, phenacyl sulfur ylide **1a** (1.80 g, 10.0 mmol) was added to the mixture, and the reaction mixture was stirred at room temperature for 12 h. The reaction was quenched by a short pad of silica gel with a gradient eluent of petroleum ether and ethyl acetate (PE/EA = 1:1), solvent was removed under vacuum. The residue was purified by column chromatography on silica gel (PE/Et<sub>2</sub>O = 100:1 to 40:1) to yield product **18** (1.32 g, 58% yield) as a yellow solid.

The diastereoselective ratio (*d.r.* > 19:1) was determined by <sup>1</sup>H NMR spectroscopy of the crude mixture.

## 6.2 Gram-Scale Synthesis of Multisubstituted Furan 53

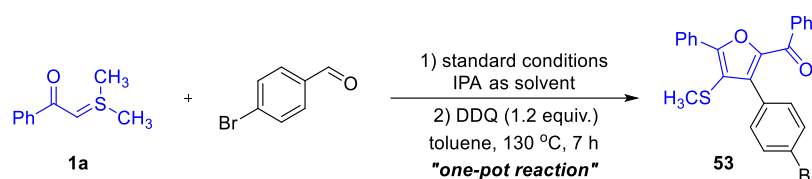

As mentioned above, after the intermolecular cyclization of 4-bromobenzaldehyde with phenacyl sulfur ylide **1a** (on a 10 mmol scale) was completed, IPA was directly removed under vacuum. To a solution of the resulting residue in toluene (20 mL) was added 2,3-dichloro-5,6-dicyano-1,4-benzoquinone (DDQ) (2.72 g, 12.0 mmol), the reaction mixture was heated up to 130 °C for 7 h. After reaction completion and cooling down to room temperature, the reaction mixture was quenched by a short pad of silica gel with a gradient eluent of petroleum ether and ethyl acetate (PE/EA = 1:1), solvent was removed under vacuum. The residue was purified by column chromatography on silica gel (PE/EA = 80:1 to 60:1) to yield product **53** (1.26 g, 56% yield) as a yellow solid.

## 7. Evaluation of Biologically Active Multisubstituted 2,3-Dihydrofurans

The anti-inflammatory and immune-regulation effect of these compounds was tested by the inhibition of T cells. Primary splenic T cells were isolated from healthy mice and activated by concanavalin A (ConA) for 24 hours. Then T cells were co-incubated with these compounds for 24 hours. Cell proliferation inhibition and viability were assessed using a CCK-8 kit, with absorbance measurements at 450 nm in the microplate reader.

Table S8. Inhibition of Compounds against splenic T cells at 10  $\mu$ M *in vitro*

| Compounds | Spleen T Cell inhibition rate (%) | Compounds | Spleen T Cell inhibition rate (%) | Compounds | Spleen T Cell inhibition rate (%) |
|-----------|-----------------------------------|-----------|-----------------------------------|-----------|-----------------------------------|
| PFD       | 19.09±3.15                        | <b>17</b> | 12.84±9.47                        | <b>34</b> | 15.76±11.74                       |
| AKF-PD    | 21.84±5.01                        | <b>18</b> | 14.41±6.66                        | <b>35</b> | 7.57±3.77                         |
| <b>3</b>  | 20.34±4.02                        | <b>19</b> | 25.68±3.99                        | <b>36</b> | 17.45±11.78                       |
| <b>4</b>  | 14.05±3.33                        | <b>20</b> | 19.68±7.06                        | <b>37</b> | 23.26±2.27                        |
| <b>5</b>  | 15.11±0.88                        | <b>22</b> | 14.74±3.26                        | <b>38</b> | 24.14±9.40                        |
| <b>6</b>  | 13.46±11.41                       | <b>23</b> | 18.03±1.13                        | <b>39</b> | 19.13±4.32                        |
| <b>7</b>  | 13.17±6.51                        | <b>24</b> | 15.91±5.67                        | <b>40</b> | 15.44±9.77                        |
| <b>8</b>  | 17.08±4.28                        | <b>25</b> | 14.78±3.62                        | <b>41</b> | 16.24±3.58                        |
| <b>9</b>  | 19.35±10.83                       | <b>26</b> | 22.46±2.63                        | <b>42</b> | 4.50±2.60                         |
| <b>10</b> | 20.89±3.44                        | <b>27</b> | 14.74±4.79                        | <b>43</b> | 22.28±0.91                        |
| <b>11</b> | 23.66±5.16                        | <b>28</b> | 20.37±10.31                       | <b>44</b> | 16.35±4.02                        |
| <b>12</b> | 21.32±12.36                       | <b>29</b> | 21.87±1.79                        | <b>45</b> | 15.62±1.50                        |
| <b>13</b> | 27.07±2.41                        | <b>30</b> | 23.34±8.34                        | <b>46</b> | 20.37±2.96                        |
| <b>14</b> | 13.42±2.78                        | <b>31</b> | 19.13±4.43                        | <b>47</b> | 15.40±3.44                        |
| <b>15</b> | 13.13±1.98                        | <b>32</b> | 25.46±4.13                        |           |                                   |

|           |            |           |            |
|-----------|------------|-----------|------------|
| <b>16</b> | 19.39±8.12 | <b>33</b> | 24.65±1.87 |
|-----------|------------|-----------|------------|

All data were average data of three replicates

Rat hepatic stellate cells (HSC-T6) were activated with transforming growth factor  $\beta$ 1 (TGF- $\beta$ 1) for 24 hours to induce the activation and proliferation, which simulated liver fibrosis. HSC-T6 were incubated with the compounds for 24 hours subsequently. The inhibition and viability of the cells were assessed using CCK-8 kit. The absorbance at 450 nm was detected utilizing a Microplate Reader.

Table S9. The inhibition of the compounds to the HSC-T6.

| Compound  | HSC-T6 inhibition rate (%) | Compound  | HSC-T6 inhibition rate (%) | Compound  | HSC-T6 inhibition rate (%) |
|-----------|----------------------------|-----------|----------------------------|-----------|----------------------------|
| PFD       | 12.70±1.75                 | <b>17</b> | 19.99±3.82                 | <b>34</b> | 8.05±4.00                  |
| AKF-PD    | 16.77±1.79                 | <b>18</b> | 20.49±2.72                 | <b>35</b> | 9.89±6.19                  |
| <b>3</b>  | 24.04±3.25                 | <b>19</b> | 24.73±6.25                 | <b>36</b> | 33.81±2.74                 |
| <b>4</b>  | 10.53±4.68                 | <b>20</b> | 20.07±5.46                 | <b>37</b> | 21.35±3.72                 |
| <b>5</b>  | 13.25±5.91                 | <b>22</b> | -4.78±1.39                 | <b>38</b> | 20.92±4.57                 |
| <b>6</b>  | 10.79±8.78                 | <b>23</b> | 15.89±1.25                 | <b>39</b> | 13.37±2.02                 |
| <b>7</b>  | 12.70±6.72                 | <b>24</b> | 31.34±10.19                | <b>40</b> | 15.45±5.91                 |
| <b>8</b>  | 17.98±6.14                 | <b>25</b> | 11.74±10.59                | <b>41</b> | 5.67±8.24                  |
| <b>9</b>  | -2.33±5.15                 | <b>26</b> | 3.89±2.74                  | <b>42</b> | 5.40±5.29                  |
| <b>10</b> | 10.56±5.25                 | <b>27</b> | 15.50±1.80                 | <b>43</b> | 5.55±6.41                  |
| <b>11</b> | 10.53±6.10                 | <b>28</b> | 26.07±12.01                | <b>44</b> | 8.31±5.46                  |
| <b>12</b> | 19.63±9.94                 | <b>29</b> | 9.60±2.26                  | <b>45</b> | 22.46±7.57                 |
| <b>13</b> | 49.61±20.97                | <b>30</b> | 9.10±0.45                  | <b>46</b> | 17.94±6.05                 |
| <b>14</b> | 18.63±6.36                 | <b>31</b> | 5.08±5.41                  | <b>47</b> | 14.33±2.53                 |
| <b>15</b> | 14.99±3.72                 | <b>32</b> | 9.82±2.91                  |           |                            |
| <b>16</b> | 10.51±7.63                 | <b>33</b> | 7.24±6.62                  |           |                            |

All data were average data of three replicates

Mouse renal tubular epithelial cells (MTEC) were activated with transforming growth factor  $\beta$ 1 (TGF- $\beta$ 1) for 24 hours to induce the activation and proliferation, which simulated renal fibrosis respectively. MTEC were incubated with the compounds for 24 hours subsequently. The inhibition and viability of the cells were assessed using CCK-8 kit. The absorbance at 450 nm was detected utilizing a Microplate Reader.

Table S10. Inhibition of Compounds against MTECs at 10  $\mu$ M *in vitro*

| Compound | MTEC inhibition rate (%) | Compound  | MTEC inhibition rate (%) | Compound  | MTEC inhibition rate (%) |
|----------|--------------------------|-----------|--------------------------|-----------|--------------------------|
| PFD      | 22.53 ± 9.17             | <b>17</b> | 18.75±8.32               | <b>34</b> | 24.62±5.22               |
| AKF-PD   | 18.62±4.52               | <b>18</b> | 23.59±2.53               | <b>35</b> | 13.25±4.30               |
| <b>3</b> | 23.91±5.14               | <b>19</b> | 21.38±6.32               | <b>36</b> | 24.00±6.14               |
| <b>4</b> | 27.49±11.90              | <b>20</b> | 22.85±6.53               | <b>37</b> | 8.55±3.17                |



|    |             |    |             |    |            |
|----|-------------|----|-------------|----|------------|
| 5  | 14.74±7.90  | 22 | 6.00±5.90   | 38 | 13.15±6.55 |
| 6  | 21.59±3.26  | 23 | 7.61±6.50   | 39 | 20.94±2.08 |
| 7  | 17.06±12.85 | 24 | 25.07±6.85  | 40 | 24.49±8.47 |
| 8  | 23.06±6.42  | 25 | 14.96±10.95 | 41 | 16.91±8.32 |
| 9  | 16.22±3.05  | 26 | 9.48±5.90   | 42 | 21.19±9.05 |
| 10 | 14.22±10.01 | 27 | 22.64±0.32  | 43 | 12.38±3.06 |
| 11 | 10.29±8.39  | 28 | 23.59±12.38 | 44 | 14.22±7.58 |
| 12 | 7.01±6.24   | 29 | 13.05±13.41 | 45 | 9.45±7.46  |
| 13 | 33.42±2.35  | 30 | 18.37±12.18 | 46 | 16.91±5.38 |
| 14 | 9.37±2.97   | 31 | 7.83±15.86  | 47 | 12.75±6.85 |
| 15 | 7.01±9.31   | 32 | 7.42±9.52   |    |            |
| 16 | 23.70±8.11  | 33 | 16.94±7.06  |    |            |

All data were average data of three replicates

We detected and screened 46 PFD derivatives to explore their effects on anti-inflammatory and anti-fibrosis. The results showed that compound **13** inhibited T cells, HSC-T6, and MTEC proliferation, and the effects were similar or superior to PFD and AKF-PD, which indicated that compound **13** has excellent anti-inflammatory and anti-fibrosis potency (Fig. 1).

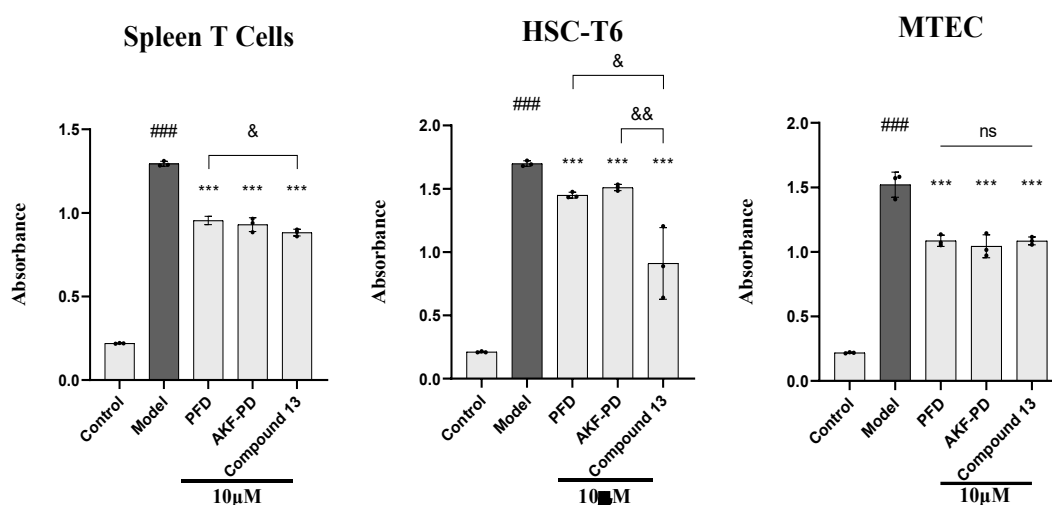

Figure S1. The inhibition of compound **13** to spleen T cells (A). HSC-T6 and (B) MTEC (C). Data are presented as means  $\pm$  SD. Data analysis was performed via one-way ANOVA. ### $P$ <0.001 compared to controls; \*\*\* $P$ <0.001 compared to models; & $P$ <0.05, && $P$ <0.01; ns, no statistically significant difference.

## 8. Mechanistic Studies

### 8.1 Reaction of vinylsulfonium salt **59** with phenacyl sulfur ylide **1a**

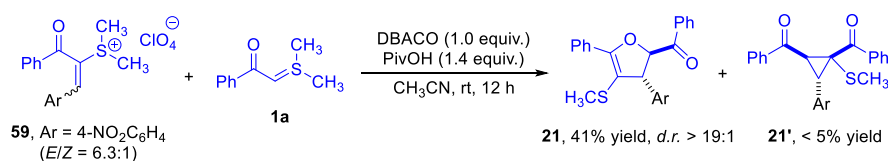

Vinylsulfonium salt **59** was prepared according to the literatures.<sup>[S2]</sup> Vinylsulfonium salt **59** (124.2 mg, 0.3 mmol, *E/Z* = 6.3:1), phenacyl sulfur ylide **1a** (54.1 mg, 0.3 mmol), DABCO (33.7 mg, 0.3 mmol) and PivOH (42.9 mg, 0.42 mmol) were dissolved in CH<sub>3</sub>CN (0.6 mL), the resulting reaction mixture was stirred at room temperature for 12 h. The reaction was quenched by a short pad of silica gel with a gradient eluent of petroleum ether and ethyl acetate (PE/EA = 2:1), solvent was removed under vacuum. The residue was analyzed by <sup>1</sup>H NMR spectroscopy of the crude mixture using CH<sub>2</sub>Br<sub>2</sub> as an internal standard.

As we expected, the reaction provided the desired product **21** in 41% yield, along with trace cyclopropanation product **21'**, suggesting that vinylsulfonium salt **59** might be involved in the reaction.

## 8.2 Ruling out $\alpha$ -sulfenyleneone **60** as possible intermediates

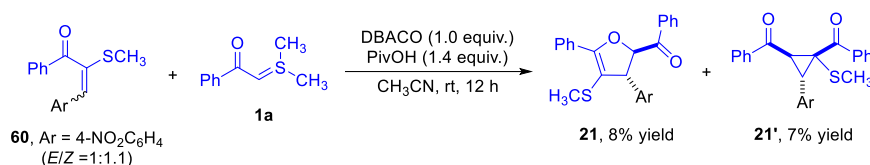

$\alpha$ -Sulfenyleneone **60** was prepared according to the literature.<sup>[S2b]</sup>  $\alpha$ -Sulfenyleneone **60** (149.7 mg, 0.5 mmol, *E/Z* = 1:1.1), phenacyl sulfur ylide **1a** (90.1 mg, 0.5 mmol), DABCO (56.1 mg, 0.5 mmol) and PivOH (71.5 mg, 0.7 mmol) were dissolved in CH<sub>3</sub>CN (1.0 mL), the resulting reaction mixture was stirred at room temperature for 12 h. The reaction was quenched by a short pad of silica gel with a gradient eluent of petroleum ether and ethyl acetate (PE/EA = 2:1), solvent was removed under vacuum. The residue was analyzed by <sup>1</sup>H NMR spectroscopy of the crude mixture using CH<sub>2</sub>Br<sub>2</sub> as an internal standard.

Notably, the reaction of  $\alpha$ -sulfenyleneone **60** with phenacyl sulfur ylide **1a** under the standard reaction conditions furnished the desired product **21** in 8% yield and cyclopropanation product **21'** in 7% yield, respectively, indicating that  $\alpha$ -sulfenyleneone **60** is much less likely than vinylsulfonium salt **59** to be involved in the reaction.

## 8.3 Analysis of an original crude reaction mixture by HRMS (ESI)

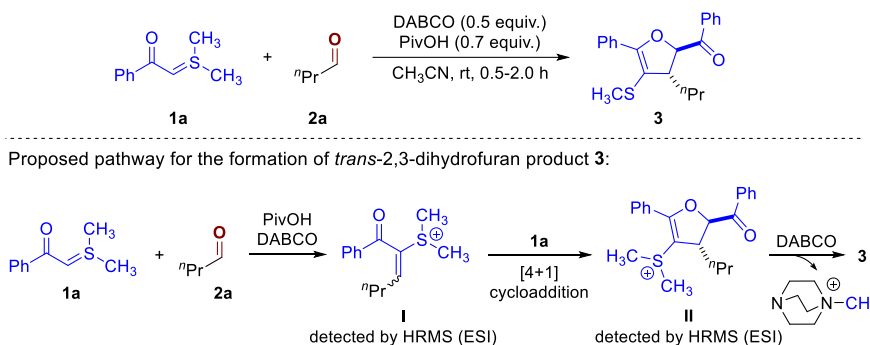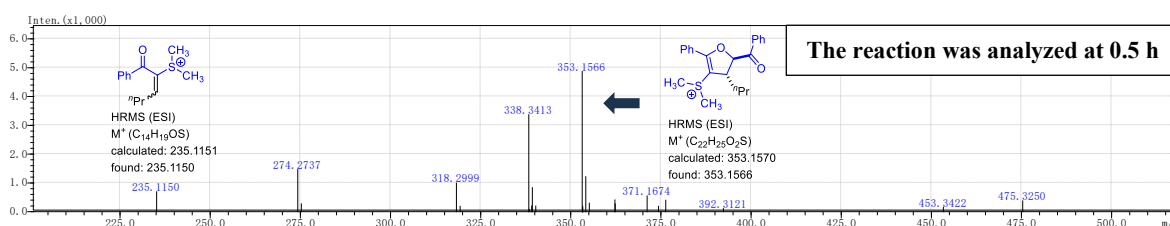

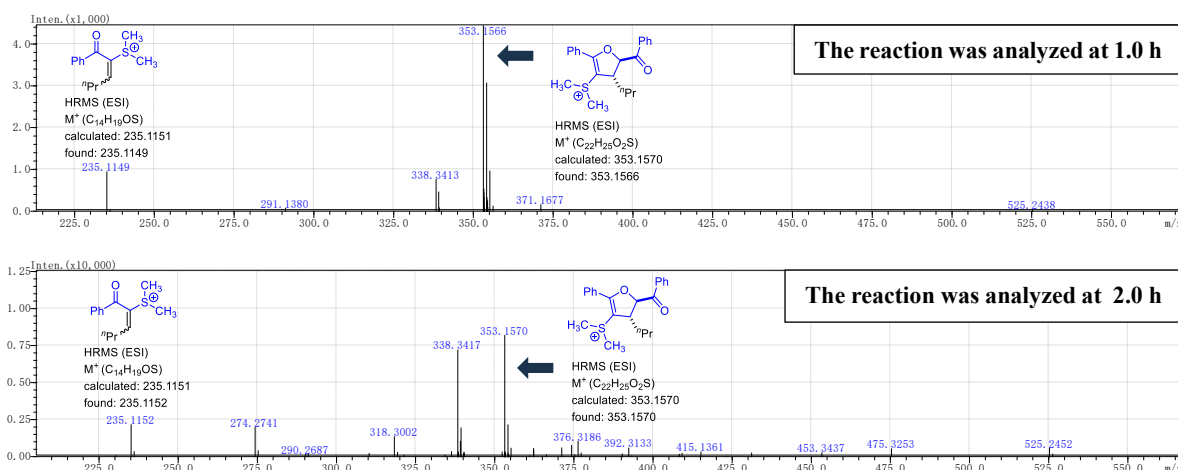

An original crude reaction mixture was analyzed by high resolution mass spectrum (HRMS) at various time. A highly reactive vinyl sulfonium salt (**int-I**) could not be separated from the reaction mixture by flash column chromatography, due to its high reactivity and low quantities, however, the highly reactive vinylsulfonium salt can be detected by HRMS (ESI) from the reaction mixture. In addition, a 2,3-dihydrofurylsulfonium salt intermediate (**int-II**) generated by the subsequent formal [4+1] cycloaddition of the possible vinylsulfonium salt intermediate (**int-I**) with a second equivalent of phenacyl sulfur ylide **1a** can also be detected by HRMS (ESI) from the same reaction mixture.

## 9. Product Characterization

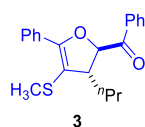

The reaction was conducted on a 1.0 mmol scale according to the general reaction conditions. Column chromatography (eluent = PE/EA, 100:0 to 80:1) yielded product **3** (150.6 mg, 89% yield) as yellow oil.

$^1H$  NMR (400 MHz,  $CDCl_3$ )  $\delta$  8.06-8.04 (m, 2H), 7.85-7.82 (m, 2H), 7.62-7.58 (m, 1H), 7.51-7.48 (m, 2H), 7.37-7.29 (m, 3H), 5.42 (d,  $J$  = 4.8 Hz, 1H), 3.64-3.60 (m, 1H), 2.16 (s, 3H), 1.95-1.86 (m, 1H), 1.74-1.65 (m, 1H), 1.52-1.41 (m, 2H), 0.99 (t,  $J$  = 7.6 Hz, 3H).  $^{13}C$  NMR (100 MHz,  $CDCl_3$ )  $\delta$  196.4, 152.7, 134.8, 133.4, 130.1, 129.1, 128.9, 128.6, 127.9, 127.7, 107.2, 84.7, 47.9, 34.8, 19.3, 16.9, 14.2. IR (KBr):  $\nu$  = 2958, 1694, 1595, 1492, 1446, 1218, 1075, 955, 782, 696  $cm^{-1}$ . HRMS:  $m/z$  (ESI) calculated for ( $C_{21}H_{23}O_2S$ )  $[M+H]^+$ : 339.1413, found: 339.1416.

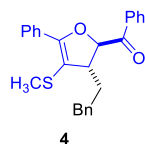

The reaction was conducted on a 1.0 mmol scale according to the general reaction conditions. Column chromatography (eluent = PE/EA, 100:0 to 80:1) yielded product **4** (169.9 mg, 85% yield) as yellow oil.

$^1\text{H}$  NMR (400 MHz,  $\text{CDCl}_3$ )  $\delta$  8.05-8.03 (m, 2H), 7.84 (d,  $J$  = 6.8 Hz, 2H), 7.60 (t,  $J$  = 7.6 Hz, 1H), 7.49 (t,  $J$  = 7.6 Hz, 2H), 7.36-7.31 (m, 3H), 7.29-7.22 (m, 4H), 7.17 (t,  $J$  = 7.2 Hz, 1H), 5.45 (d,  $J$  = 4.8 Hz, 1H), 3.72-3.69 (m, 1H), 2.80-2.74 (m, 2H), 2.27-2.24 (m, 1H), 2.11 (s, 3H), 2.09-2.05 (m, 1H).  $^{13}\text{C}$  NMR (100 MHz,  $\text{CDCl}_3$ )  $\delta$  196.2, 152.9, 141.6, 134.8, 133.5, 129.9, 129.1, 128.9, 128.6, 128.43, 128.41, 127.9, 127.7, 125.9, 106.9, 84.5, 47.6, 34.2, 32.3, 16.8. IR (KBr):  $\nu$  = 2920, 1690, 1596, 1490, 1445, 1230, 1053, 768, 689  $\text{cm}^{-1}$ . HRMS:  $m/z$  (ESI) calculated for ( $\text{C}_{26}\text{H}_{25}\text{O}_2\text{S}$ )  $[\text{M}+\text{H}]^+$ : 401.1570, found: 401.1573.

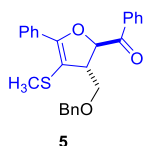

The reaction was conducted on a 1.0 mmol scale according to the general reaction conditions. Column chromatography (eluent = PE/EA, 100:0 to 40:1) yielded product **5** (145.6 mg, 70% yield) as yellow oil.

$^1\text{H}$  NMR (400 MHz,  $\text{CDCl}_3$ )  $\delta$  8.16-8.14 (m, 2H), 7.94-7.92 (m, 2H), 7.57 (t,  $J$  = 7.6 Hz, 1H), 7.42-7.31 (m, 10H), 5.86 (d,  $J$  = 3.6 Hz, 1H), 4.64 (dd,  $J$  = 14.0, 11.6 Hz, 2H), 3.91 (dd,  $J$  = 9.2, 3.6 Hz, 1H), 3.77 (t,  $J$  = 8.8 Hz, 1H), 3.72-3.69 (m, 1H), 2.12 (s, 3H).  $^{13}\text{C}$  NMR (100 MHz,  $\text{CDCl}_3$ )  $\delta$  195.2, 155.5, 138.0, 134.0, 133.5, 129.9, 129.2, 129.1, 128.6, 128.4, 128.0, 127.9, 127.75, 127.71, 102.8, 82.4, 73.4, 70.5, 49.8, 17.4. IR (KBr):  $\nu$  = 3055, 2854, 1696, 1597, 1495, 1449, 1219, 1113, 1029, 763, 692  $\text{cm}^{-1}$ . HRMS:  $m/z$  (ESI) calculated for ( $\text{C}_{26}\text{H}_{25}\text{O}_3\text{S}$ )  $[\text{M}+\text{H}]^+$ : 417.1519, found: 417.1515.

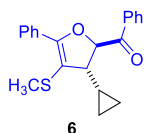

The reaction was conducted on a 1.0 mmol scale according to the general reaction conditions. Column chromatography (eluent = PE/ $\text{Et}_2\text{O}$ , 100:0 to 40:1) yielded product **6** (119.6 mg, 71% yield) as a yellow solid (m.p. = 81-82  $^{\circ}\text{C}$ ).

$^1\text{H}$  NMR (400 MHz,  $\text{CDCl}_3$ )  $\delta$  8.08-8.06 (m, 2H), 7.91-7.88 (m, 2H), 7.60 (t,  $J$  = 7.6 Hz, 1H), 7.49 (t,  $J$  = 8.0 Hz, 2H), 7.38-7.30 (m, 3H), 5.58 (d,  $J$  = 5.2 Hz, 1H), 2.90 (dd,  $J$  = 9.2, 4.8 Hz, 1H), 2.19 (s, 3H), 1.16-1.07 (m, 1H), 0.79-0.72 (m, 1H), 0.65-0.58 (m, 1H), 0.56-0.49 (m, 1H), 0.27-0.21 (m, 1H).  $^{13}\text{C}$  NMR (100 MHz,  $\text{CDCl}_3$ )  $\delta$  196.0, 153.9, 134.6, 133.5, 130.0, 129.1, 129.0, 128.6, 127.9, 107.2, 85.7, 53.7, 17.7, 15.7, 4.6, 2.3. IR (KBr):  $\nu$  = 3057, 2917, 1697, 1595, 1492, 1443, 1222, 1093, 966, 766, 698, 551  $\text{cm}^{-1}$ . HRMS:  $m/z$  (ESI) calculated for ( $\text{C}_{21}\text{H}_{21}\text{O}_2\text{S}$ )  $[\text{M}+\text{H}]^+$ : 337.1257, found: 337.1250.

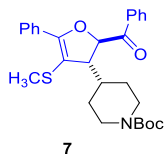

The reaction was conducted on a 1.0 mmol scale according to the general reaction conditions. Column chromatography (eluent = PE/EA, 100:0 to 10:1) yielded product **7** (179.1 mg, 75% yield) as a yellow solid (m.p. = 125-126 °C).

$^1\text{H}$  NMR (400 MHz,  $\text{CDCl}_3$ )  $\delta$  8.06 (d,  $J$  = 7.2 Hz, 2H), 7.79-7.77 (m, 2H), 7.61 (t,  $J$  = 7.6 Hz, 1H), 7.51 (t,  $J$  = 7.6 Hz, 2H), 7.36-7.31 (m, 3H), 5.43 (d,  $J$  = 3.6 Hz, 1H), 4.22 (s, 2H), 3.72 (s, 1H), 2.77-2.67 (m, 2H), 2.18 (s, 3H), 2.16-2.09 (m, 1H), 1.65 (d,  $J$  = 12.4 Hz, 2H), 1.46 (s, 9H), 1.43-1.37 (m, 2H).  $^{13}\text{C}$  NMR (100 MHz,  $\text{CDCl}_3$ )  $\delta$  196.4, 154.7, 153.3, 134.8, 133.5, 129.7, 129.2, 129.0, 128.6, 127.9, 127.8, 105.0, 81.4, 79.4, 51.6, 44.2, 37.4, 29.8, 28.4, 26.6, 16.8. IR (KBr):  $\nu$  = 3371, 2928, 1687, 1595, 1432, 1363, 1238, 1172, 1083, 759, 693  $\text{cm}^{-1}$ . HRMS:  $m/z$  (ESI) calculated for  $(\text{C}_{28}\text{H}_{34}\text{NO}_4\text{S})$   $[\text{M}+\text{H}]^+$ : 480.2203, found: 480.2211.

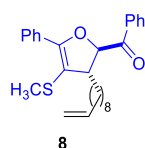

The reaction was conducted on a 1.0 mmol scale according to the general reaction conditions. Column chromatography (eluent = PE/EA, 100:0 to 60:1) yielded product **8** (136.8 mg, 63% yield) as yellow oil.

$^1\text{H}$  NMR (400 MHz,  $\text{CDCl}_3$ )  $\delta$  8.06-8.04 (m, 2H), 7.85-7.83 (m, 2H), 7.59 (t,  $J$  = 7.2 Hz, 1H), 7.49 (t,  $J$  = 7.6 Hz, 2H), 7.36-7.28 (m, 3H), 5.86-5.76 (m, 1H), 5.42 (d,  $J$  = 4.8 Hz, 1H), 5.01-4.91 (m, 2H), 3.63-3.59 (m, 1H), 2.15 (s, 3H), 2.03 (q,  $J$  = 7.2 Hz, 2H), 1.94-1.87 (m, 1H), 1.73-1.66 (m, 1H), 1.44-1.29 (m, 12H).  $^{13}\text{C}$  NMR (100 MHz,  $\text{CDCl}_3$ )  $\delta$  196.3, 152.6, 139.1, 134.8, 133.4, 130.0, 129.1, 128.9, 128.6, 127.9, 127.7, 114.1, 107.2, 84.6, 48.0, 33.7, 32.5, 29.7, 29.4, 29.3, 29.0, 28.8, 25.9, 16.8. IR (KBr):  $\nu$  = 2915, 1694, 1596, 1490, 1446, 1229, 1065, 963, 769, 692  $\text{cm}^{-1}$ . HRMS:  $m/z$  (ESI) calculated for  $(\text{C}_{28}\text{H}_{35}\text{O}_2\text{S})$   $[\text{M}+\text{H}]^+$ : 435.2352, found: 435.2360.

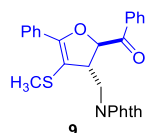

The reaction was conducted on a 1.0 mmol scale according to the general reaction conditions. Column chromatography (eluent = PE/DCM, 100:0 to 2:1) yielded product **9** (119.8 mg, 53% yield) as a white solid (m.p. = 149-150 °C).

$^1\text{H}$  NMR (400 MHz,  $\text{CDCl}_3$ )  $\delta$  7.97-7.94 (m, 2H), 7.84-7.79 (m, 4H), 7.72-7.68 (m, 2H), 7.50 (t,  $J$  = 7.2 Hz, 1H), 7.37-7.31 (m, 5H), 5.84 (d,  $J$  = 4.4 Hz, 1H), 4.31 (dd,  $J$  = 13.2, 2.4 Hz, 1H), 4.07-3.96 (m, 2H), 2.28 (s, 3H).  $^{13}\text{C}$  NMR (100 MHz,  $\text{CDCl}_3$ )  $\delta$  195.9, 168.6, 153.9, 134.5, 134.0, 133.3, 131.8, 129.5, 129.1, 129.0, 128.4, 127.9, 127.8, 123.3, 104.1, 83.5, 47.9, 39.7, 16.7. IR (KBr):  $\nu$  = 3454, 2923, 1767, 1699, 1433, 1392, 1329, 1218, 1118, 1059, 1006, 969, 901, 768, 691, 528  $\text{cm}^{-1}$ . HRMS:  $m/z$  (ESI) calculated for  $(\text{C}_{27}\text{H}_{22}\text{NO}_4\text{S})$   $[\text{M}+\text{H}]^+$ : 456.1264, found: 456.1254.

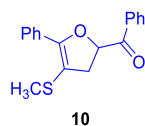

The reaction was conducted on a 2.0 mmol scale according to the general reaction conditions. Column chromatography (eluent = PE/EA, 100:0 to 40:1) yielded product **10** (124.4 mg, 42% yield) as a light yellow solid (m.p. = 80-81 °C).

$^1\text{H}$  NMR (400 MHz,  $\text{CDCl}_3$ )  $\delta$  8.06 (d,  $J$  = 7.6 Hz, 2H), 7.85 (d,  $J$  = 7.2 Hz, 2H), 7.61 (t,  $J$  = 7.6 Hz, 1H), 7.50 (t,  $J$  = 7.6 Hz, 2H), 7.37-7.29 (m, 3H), 5.77 (dd,  $J$  = 11.2, 7.6 Hz, 1H), 3.43 (dd,  $J$  = 15.6, 7.6 Hz, 1H), 3.34 (dd,  $J$  = 15.2, 11.2 Hz, 1H), 2.25 (s, 3H).  $^{13}\text{C}$  NMR (100 MHz,  $\text{CDCl}_3$ )  $\delta$  195.7, 151.9, 134.5, 133.6, 130.0, 129.1, 128.7, 128.6, 127.9, 127.4, 102.5, 79.5, 37.9, 16.5. IR (KBr):  $\nu$  = 2907, 1686, 1596, 1446, 1325, 1220, 1065, 915, 768, 691  $\text{cm}^{-1}$ . HRMS:  $m/z$  (ESI) calculated for  $(\text{C}_{18}\text{H}_{17}\text{O}_2\text{S})$   $[\text{M}+\text{H}]^+$ : 297.0944, found: 297.0949.

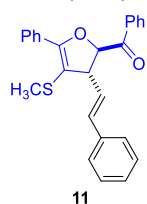

The reaction was conducted on a 1.0 mmol scale according to the general reaction conditions. Column chromatography (eluent = PE/DCM, 100:0 to 1:1) yielded product **11** (115.5 mg, 58% yield) as yellow oil.

$^1\text{H}$  NMR (400 MHz,  $\text{CDCl}_3$ )  $\delta$  8.06-8.03 (m, 2H), 7.97-7.95 (m, 2H), 7.60 (t,  $J$  = 7.6 Hz, 1H), 7.49 (t,  $J$  = 7.6 Hz, 2H), 7.43 (d,  $J$  = 7.2 Hz, 2H), 7.41-7.32 (m, 5H), 7.26 (t,  $J$  = 7.2 Hz, 1H), 6.61 (d,  $J$  = 16.0 Hz, 1H), 6.41 (dd,  $J$  = 15.6, 9.2 Hz, 1H), 5.63 (d,  $J$  = 5.2 Hz, 1H), 4.23 (dd,  $J$  = 8.8, 5.2 Hz, 1H), 2.16 (s, 3H).  $^{13}\text{C}$  NMR (100 MHz,  $\text{CDCl}_3$ )  $\delta$  194.7, 154.0, 136.4, 134.1, 133.7, 132.9, 129.8, 129.13, 129.08, 128.7, 128.6, 128.0, 127.8, 127.7, 126.5, 105.5, 84.7, 53.8, 17.0. IR (KBr):  $\nu$  = 3024, 2923, 1694, 1596, 1490, 1447, 1229, 1066, 963, 749, 691  $\text{cm}^{-1}$ . HRMS:  $m/z$  (ESI) calculated for  $(\text{C}_{26}\text{H}_{23}\text{O}_2\text{S})$   $[\text{M}+\text{H}]^+$ : 399.1413, found: 399.1426.

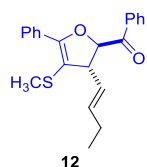

The reaction was conducted on a 2.0 mmol scale according to the general reaction conditions. Column chromatography (eluent = PE/EA, 100:0 to 40:1) yielded product **12** (84.1 mg, 24% yield,  $E/Z$  = 15.8:1) as a yellow solid (m.p. = 60-61 °C).

$^1\text{H}$  NMR (400 MHz,  $\text{CDCl}_3$ )  $\delta$  8.03-8.01 (m, 2H), 7.95-7.93 (m, 2H), 7.60 (t,  $J$  = 7.6 Hz, 1H), 7.48 (t,  $J$  = 8.0 Hz, 2H), 7.39-7.31 (m, 3H), 5.72 (dd,  $J$  = 15.2, 6.0 Hz, 1H), 5.64 (dd,  $J$  = 15.2, 8.4 Hz, 1H), 5.51 (d,  $J$  = 5.6 Hz, 1H), 3.99 (dd,  $J$  = 8.4, 5.2 Hz, 1H), 2.18-2.11 (m, 5H), 1.05 (t,  $J$  = 7.6 Hz, 3H).  $^{13}\text{C}$  NMR (100 MHz,  $\text{CDCl}_3$ )  $\delta$  195.0, 153.4, 136.1, 134.1, 133.5, 130.0, 129.0, 128.9, 128.6, 128.1, 127.9, 127.7, 105.7, 85.0, 53.7, 25.4, 16.8, 13.5. IR (KBr):  $\nu$  = 2958, 1696, 1597, 1493, 1446, 1229, 1066, 968, 768, 689  $\text{cm}^{-1}$ . HRMS:  $m/z$  (ESI) calculated for  $(\text{C}_{22}\text{H}_{23}\text{O}_2\text{S})$   $[\text{M}+\text{H}]^+$ : 351.1413, found: 351.1418.

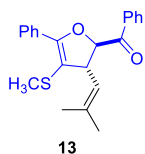

The reaction was conducted on a 1.0 mmol scale according to the general reaction conditions. Column chromatography (eluent = PE/EA, 100:0 to 60:1) yielded product **13** (119.0 mg, 68% yield) as a yellow solid (m.p. = 65-66 °C).

$^1\text{H}$  NMR (400 MHz,  $\text{CDCl}_3$ )  $\delta$  8.03-8.01 (m, 2H), 7.94-7.92 (m, 2H), 7.61 (t,  $J$  = 7.6 Hz, 1H), 7.49 (t,  $J$  = 8.0 Hz, 2H), 7.39-7.33 (m, 3H), 5.46 (d,  $J$  = 6.0 Hz, 1H), 5.40 (dt,  $J$  = 10.0, 1.2 Hz, 1H), 4.32 (dd,  $J$  = 10.4, 6.0 Hz, 1H), 2.14 (s, 3H), 1.82 (d,  $J$  = 1.2 Hz, 3H), 1.63 (d,  $J$  = 1.2 Hz, 3H).  $^{13}\text{C}$  NMR (100 MHz,  $\text{CDCl}_3$ )  $\delta$  195.3, 153.5, 135.7, 134.4, 133.6, 130.1, 129.0, 128.9, 128.6, 127.9, 127.8, 124.6, 106.3, 85.4, 49.4, 25.9, 18.1, 17.1. IR (KBr):  $\nu$  = 2925, 1694, 1595, 1492, 1446, 1218, 1075, 955, 782, 696  $\text{cm}^{-1}$ . HRMS:  $m/z$  (ESI) calculated for  $(\text{C}_{22}\text{H}_{23}\text{O}_2\text{S})$   $[\text{M}+\text{H}]^+$ : 351.1413 found: 351.1408.

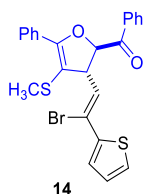

The reaction was conducted on a 1.0 mmol scale according to the general reaction conditions. Column chromatography (eluent = PE/EA, 100:0 to 40:1) yielded product **14** (137.4 mg, 57% yield) as a yellow solid (m.p. = 149-150 °C).

$^1\text{H}$  NMR (400 MHz,  $\text{CDCl}_3$ )  $\delta$  8.06-8.04 (m, 2H), 7.94-7.91 (m, 2H), 7.62 (t,  $J$  = 7.6 Hz, 1H), 7.50 (t,  $J$  = 7.6 Hz, 2H), 7.40-7.34 (m, 4H), 7.29 (dd,  $J$  = 5.2, 1.2 Hz, 1H), 7.02 (dd,  $J$  = 5.2, 3.6 Hz, 1H), 6.53 (d,  $J$  = 9.2 Hz, 1H), 5.65 (d,  $J$  = 4.8 Hz, 1H), 4.80 (dd,  $J$  = 9.2, 4.4 Hz, 1H), 2.23 (s, 3H).  $^{13}\text{C}$  NMR (100 MHz,  $\text{CDCl}_3$ )  $\delta$  193.9, 154.3, 142.1, 133.9, 133.7, 129.7, 129.3, 129.1, 128.8, 128.4, 128.0, 127.95, 127.88, 127.2, 126.3, 119.4, 105.3, 83.8, 52.5, 17.4. IR (KBr):  $\nu$  = 2917, 1693, 1597, 1489, 1445, 1245, 1209, 1052, 762, 688  $\text{cm}^{-1}$ . HRMS:  $m/z$  (ESI) calculated for  $(\text{C}_{24}\text{H}_{20}\text{BrO}_2\text{S}_2)$   $[\text{M}+\text{H}]^+$ : 483.0083, found: 483.0094.

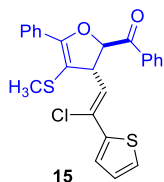

The reaction was conducted on a 1.0 mmol scale according to the general reaction conditions. Column chromatography (eluent = PE/ $\text{Et}_2\text{O}$ , 100:0 to 20:1) yielded product **15** (162.1 mg, 74% yield) as a yellow solid (m.p. = 120-121 °C).

$^1\text{H}$  NMR (400 MHz,  $\text{CDCl}_3$ )  $\delta$  8.05 (d,  $J$  = 7.6 Hz, 2H), 7.92 (d,  $J$  = 6.8 Hz, 2H), 7.61 (t,  $J$  = 7.2 Hz, 1H), 7.50 (t,  $J$  = 7.6 Hz, 2H), 7.39-7.33 (m, 4H), 7.27 (d,  $J$  = 4.8 Hz, 1H), 7.01 (t,  $J$  = 4.8 Hz, 1H), 6.38 (d,  $J$  = 9.6 Hz, 1H), 5.64 (d,  $J$  = 4.4 Hz, 1H), 4.84 (dd,  $J$  = 9.2, 4.4 Hz, 1H), 2.21 (s, 3H).  $^{13}\text{C}$  NMR (100 MHz,  $\text{CDCl}_3$ )  $\delta$  194.0, 154.1, 140.9, 133.9, 133.7, 129.7, 129.2,

129.0, 128.7, 128.6, 128.0, 127.9, 127.4, 126.6, 126.2, 124.8, 105.4, 84.0, 49.7, 17.2. IR (KBr):  $\nu$  = 2927, 1694, 1596, 1489, 1445, 1250, 1049, 865, 761, 688  $\text{cm}^{-1}$ . HRMS:  $m/z$  (ESI) calculated for  $(\text{C}_{24}\text{H}_{20}\text{ClO}_2\text{S}_2)$   $[\text{M}+\text{H}]^+$ : 439.0588, found: 439.0595.

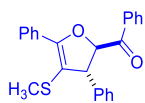

**16**

The reaction was conducted on a 1.0 mmol scale according to the general reaction conditions. Column chromatography (eluent = PE/EA, 100:0 to 60:1) yielded product **16** (87.5 mg, 47% yield) as a white solid (m.p. = 109-110  $^{\circ}\text{C}$ ).

$^1\text{H}$  NMR (400 MHz,  $\text{CDCl}_3$ )  $\delta$  7.99-7.96 (m, 4H), 7.60 (t,  $J$  = 7.6 Hz, 1H), 7.47 (t,  $J$  = 8.0 Hz, 2H), 7.42-7.31 (m, 8H), 5.70 (d,  $J$  = 4.8 Hz, 1H), 4.62 (d,  $J$  = 4.4 Hz, 1H), 1.99 (s, 3H).  $^{13}\text{C}$  NMR (100 MHz,  $\text{CDCl}_3$ )  $\delta$  194.6, 153.9, 141.6, 134.1, 133.7, 129.8, 129.1, 129.0, 128.7, 128.0, 127.8, 127.7, 107.2, 87.0, 55.6, 16.8. IR (KBr):  $\nu$  = 3021, 2914, 1693, 1593, 1487, 1445, 1373, 1222, 1095, 962, 763, 695, 548  $\text{cm}^{-1}$ . HRMS:  $m/z$  (ESI) calculated for  $(\text{C}_{24}\text{H}_{21}\text{O}_2\text{S})$   $[\text{M}+\text{H}]^+$ : 373.1257, found: 373.1261.

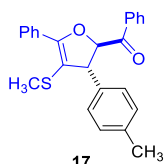

**17**

The reaction was conducted on a 1.0 mmol scale according to the general reaction conditions. Column chromatography (eluent = PE/ $\text{Et}_2\text{O}$ , 100:0 to 40:1) yielded product **17** (96.5 mg, 50% yield) as a yellow solid (m.p. = 97-98  $^{\circ}\text{C}$ ).

$^1\text{H}$  NMR (400 MHz,  $\text{CDCl}_3$ )  $\delta$  7.99-7.96 (m, 4H), 7.61 (t,  $J$  = 7.6 Hz, 1H), 7.47 (t,  $J$  = 8.0 Hz, 2H), 7.42-7.36 (m, 3H), 7.26 (d,  $J$  = 8.0 Hz, 2H), 7.21 (d,  $J$  = 8.0 Hz, 2H), 5.69 (d,  $J$  = 4.8 Hz, 1H), 4.57 (d,  $J$  = 4.8 Hz, 1H), 2.38 (s, 3H), 2.00 (s, 3H).  $^{13}\text{C}$  NMR (100 MHz,  $\text{CDCl}_3$ )  $\delta$  194.8, 153.8, 138.5, 137.4, 134.1, 133.7, 129.9, 129.7, 129.14, 129.12, 128.7, 128.0, 127.93, 127.86, 107.3, 87.1, 55.3, 21.2, 16.7. IR (KBr):  $\nu$  = 2920, 1696, 1594, 1443, 1225, 1092, 961, 775, 686, 574  $\text{cm}^{-1}$ . HRMS:  $m/z$  (ESI) calculated for  $(\text{C}_{25}\text{H}_{23}\text{O}_2\text{S})$   $[\text{M}+\text{H}]^+$ : 387.1413, found: 387.1410.

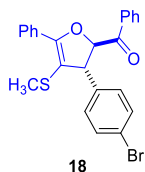

**18**

The reaction was conducted on a 1.0 mmol scale according to the general reaction conditions. Column chromatography (eluent = PE/ $\text{Et}_2\text{O}$ , 100:0 to 40:1) yielded product **18** (144.1 mg, 64% yield) as a light yellow solid (m.p. = 99-100  $^{\circ}\text{C}$ ).

$^1\text{H}$  NMR (400 MHz,  $\text{CDCl}_3$ )  $\delta$  7.99-7.94 (m, 4H), 7.62 (t,  $J$  = 7.6 Hz, 1H), 7.54-7.47 (m, 4H), 7.42-7.37 (m, 3H), 7.27-7.25 (m, 2H), 5.63 (d,  $J$  = 5.2 Hz, 1H), 4.63 (d,  $J$  = 4.8 Hz, 1H), 2.02 (s, 3H).  $^{13}\text{C}$  NMR (100 MHz,  $\text{CDCl}_3$ )  $\delta$  194.4, 154.2, 140.6, 134.1, 133.8, 132.1, 129.8, 129.6, 129.3, 129.1, 128.7, 128.1, 127.8, 121.6, 106.8, 86.8, 54.8, 16.8. IR (KBr):  $\nu$  = 3060, 2937,



1692, 1593, 1485, 1449, 1220, 1072, 1008, 769, 691  $\text{cm}^{-1}$ . HRMS:  $m/z$  (ESI) calculated for  $(\text{C}_{24}\text{H}_{20}\text{BrO}_2\text{S})$   $[\text{M}+\text{H}]^+$ : 451.0362, found: 451.0368.

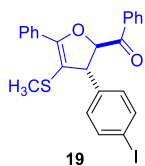

The reaction was conducted on a 1.0 mmol scale according to the general reaction conditions. Column chromatography (eluent = PE/EA, 100:0 to 50:1) yielded product **19** (154.4 mg, 62% yield) as a yellow solid (m.p. = 123-124  $^{\circ}\text{C}$ ).

$^1\text{H}$  NMR (400 MHz,  $\text{CDCl}_3$ )  $\delta$  7.98-7.94 (m, 4H), 7.72 (d,  $J$  = 8.4 Hz, 2H), 7.61 (t,  $J$  = 7.6 Hz, 1H), 7.48 (t,  $J$  = 7.6 Hz, 2H), 7.40-7.36 (m, 3H), 7.12 (d,  $J$  = 8.4 Hz, 2H), 5.62 (d,  $J$  = 4.8 Hz, 1H), 4.61 (d,  $J$  = 4.8 Hz, 1H), 2.01 (s, 3H).  $^{13}\text{C}$  NMR (100 MHz,  $\text{CDCl}_3$ )  $\delta$  194.3, 154.2, 141.3, 138.1, 134.0, 133.8, 130.0, 129.6, 129.3, 129.1, 128.7, 128.0, 127.8, 106.8, 93.2, 86.7, 54.8, 16.8. IR (KBr):  $\nu$  = 3055, 2937, 1692, 1595, 1479, 1446, 1219, 1076, 1005, 966, 769, 692, 556  $\text{cm}^{-1}$ . HRMS:  $m/z$  (ESI) calculated for  $(\text{C}_{24}\text{H}_{20}\text{IO}_2\text{S})$   $[\text{M}+\text{H}]^+$ : 499.0223, found: 499.0218.

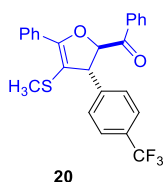

The reaction was conducted on a 1.0 mmol scale according to the general reaction conditions. Column chromatography (eluent = PE/EA, 100:0 to 50:1) yielded product **20** (107.8 mg, 49% yield) as a yellow solid (m.p. = 80-81  $^{\circ}\text{C}$ ).

$^1\text{H}$  NMR (400 MHz,  $\text{CDCl}_3$ )  $\delta$  8.00-7.94 (m, 4H), 7.67-7.61 (m, 3H), 7.52-7.48 (m, 4H), 7.42-7.37 (m, 3H), 5.65 (d,  $J$  = 4.8 Hz, 1H), 4.78 (d,  $J$  = 4.8 Hz, 1H), 2.03 (s, 3H).  $^{13}\text{C}$  NMR (100 MHz,  $\text{CDCl}_3$ )  $\delta$  194.3, 154.4, 145.6, 134.1, 133.9, 130.0 (q,  $J$  = 32.5 Hz), 129.5, 129.4, 129.2, 128.8, 128.5, 128.1, 127.9, 126.0 (q,  $J$  = 3.6 Hz), 124.1 (q,  $J$  = 270.1 Hz), 106.7, 86.7, 54.7, 16.8.  $^{19}\text{F}$  NMR (376 MHz,  $\text{CDCl}_3$ )  $\delta$  -62.41 (s, 3F). IR (KBr):  $\nu$  = 3064, 2940, 1693, 1671, 1450, 1320, 1128, 1066, 956, 849, 769, 691  $\text{cm}^{-1}$ . HRMS:  $m/z$  (ESI) calculated for  $(\text{C}_{25}\text{H}_{20}\text{F}_3\text{O}_2\text{S})$   $[\text{M}+\text{H}]^+$ : 441.1131 found: 441.1125.

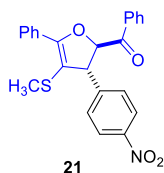

The reaction was conducted on a 1.0 mmol scale according to the general reaction conditions. Column chromatography (eluent = PE/DCM, 100:0 to 1:1) yielded product **21** (131.4 mg, 63% yield) as yellow oil.

$^1\text{H}$  NMR (400 MHz,  $\text{CDCl}_3$ )  $\delta$  8.24 (d,  $J$  = 8.8 Hz, 2H), 8.01-7.99 (m, 2H), 7.96-7.93 (m, 2H), 7.62 (t,  $J$  = 7.6 Hz, 1H), 7.55 (d,  $J$  = 8.8 Hz, 2H), 7.49 (t,  $J$  = 8.0 Hz, 2H), 7.40-7.33 (m, 3H), 5.66 (d,  $J$  = 4.8 Hz, 1H), 4.88 (d,  $J$  = 4.8 Hz, 1H), 2.04 (s, 3H).  $^{13}\text{C}$  NMR (100 MHz,  $\text{CDCl}_3$ )  $\delta$

194.0, 154.6, 149.0, 147.4, 134.0, 133.9, 129.5, 129.3, 129.2, 129.0, 128.7, 128.1, 127.8, 124.2, 106.5, 86.3, 54.4, 16.7. IR (KBr):  $\nu$  = 2919, 1691, 1597, 1519, 1347, 1224, 690  $\text{cm}^{-1}$ . HRMS:  $m/z$  (ESI) calculated for  $(\text{C}_{24}\text{H}_{20}\text{NO}_4\text{S})$   $[\text{M}+\text{H}]^+$ : 418.1108, found: 418.1118.

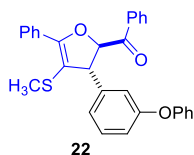

The reaction was conducted on a 1.0 mmol scale according to the general reaction conditions. Column chromatography (eluent = PE/Et<sub>2</sub>O, 100:0 to 40:1) yielded product **22** (97.4 mg, 42% yield) as a white solid (m.p. = 101-102 °C).

<sup>1</sup>H NMR (400 MHz, CDCl<sub>3</sub>)  $\delta$  7.98 (d,  $J$  = 7.6 Hz, 2H), 7.95-7.93 (m, 2H), 7.60 (t,  $J$  = 7.6 Hz, 1H), 7.47 (t,  $J$  = 7.6 Hz, 2H), 7.40-7.31 (m, 6H), 7.14-7.02 (m, 5H), 6.96-6.94 (m, 1H), 5.70 (d,  $J$  = 4.8 Hz, 1H), 4.60 (d,  $J$  = 4.4 Hz, 1H), 2.02 (s, 3H). <sup>13</sup>C NMR (100 MHz, CDCl<sub>3</sub>)  $\delta$  194.5, 157.7, 156.9, 154.2, 143.7, 134.1, 133.7, 130.3, 129.8, 129.2, 129.1, 128.7, 128.0, 127.9, 123.4, 122.8, 118.9, 118.6, 117.8, 107.0, 86.8, 55.3, 16.9. IR (KBr):  $\nu$  = 3052, 2918, 1697, 1585, 1482, 1442, 1253, 1218, 1092, 868, 758, 689  $\text{cm}^{-1}$ . HRMS:  $m/z$  (ESI) calculated for  $(\text{C}_{30}\text{H}_{25}\text{O}_3\text{S})$   $[\text{M}+\text{H}]^+$ : 465.1519, found: 465.1525.

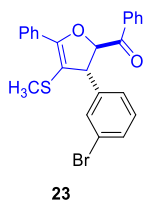

The reaction was conducted on a 1.0 mmol scale according to the general reaction conditions. Column chromatography (eluent = PE/Et<sub>2</sub>O, 100:0 to 20:1) yielded product **23** (114.8 mg, 51% yield) as yellow oil.

<sup>1</sup>H NMR (400 MHz, CDCl<sub>3</sub>)  $\delta$  8.01-7.98 (m, 2H), 7.97-7.95 (m, 2H), 7.63 (t,  $J$  = 7.2 Hz, 1H), 7.52-7.46 (m, 4H), 7.42-7.37 (m, 3H), 7.32-7.30 (m, 1H), 7.27-7.25 (m, 1H), 5.65 (d,  $J$  = 4.8 Hz, 1H), 4.66 (d,  $J$  = 4.8 Hz, 1H), 2.04 (s, 3H). <sup>13</sup>C NMR (100 MHz, CDCl<sub>3</sub>)  $\delta$  194.3, 154.3, 143.9, 134.1, 133.9, 131.1, 130.9, 130.6, 129.6, 129.4, 129.2, 128.8, 128.1, 127.9, 126.8, 123.1, 106.8, 86.7, 54.7, 16.8. IR (KBr):  $\nu$  = 3055, 2917, 1689, 1593, 1446, 1223, 1066, 768, 692  $\text{cm}^{-1}$ . HRMS:  $m/z$  (ESI) calculated for  $(\text{C}_{24}\text{H}_{20}\text{BrO}_2\text{S})$   $[\text{M}+\text{H}]^+$ : 451.0362, found: 451.0369.

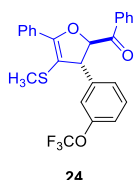

The reaction was conducted on a 1.0 mmol scale according to the general reaction conditions. Column chromatography (eluent = PE/Et<sub>2</sub>O, 100:0 to 20:1) yielded product **24** (111.6 mg, 49% yield) as a white solid (m.p. = 107-108 °C).

<sup>1</sup>H NMR (400 MHz, CDCl<sub>3</sub>)  $\delta$  8.00-7.95 (m, 4H), 7.62 (t,  $J$  = 7.6 Hz, 1H), 7.49 (t,  $J$  = 8.0 Hz, 2H), 7.45-7.37 (m, 4H), 7.33 (d,  $J$  = 7.6 Hz, 1H), 7.22-7.19 (m, 2H), 5.66 (d,  $J$  = 5.2 Hz, 1H),

4.70 (d,  $J = 5.2$  Hz, 1H), 2.01 (s, 3H).  $^{13}\text{C}$  NMR (100 MHz,  $\text{CDCl}_3$ )  $\delta$  194.3, 154.5, 149.7, 144.0, 134.0, 133.9, 130.4, 129.6, 129.4, 129.2, 128.8, 128.1, 127.9, 126.4, 120.7, 120.4 (q,  $J = 255.7$  Hz), 120.1, 106.6, 86.7, 54.9, 16.8.  $^{19}\text{F}$  NMR (376 MHz,  $\text{CDCl}_3$ )  $\delta$  -57.65 (s, 3F). IR (KBr):  $\nu = 2930, 1693, 1596, 1446, 1258, 1213, 1115, 966, 768, 693\text{ cm}^{-1}$ . HRMS:  $m/z$  (ESI) calculated for  $(\text{C}_{25}\text{H}_{20}\text{F}_3\text{O}_3\text{S}) [\text{M}+\text{H}]^+$ : 457.1080, found: 457.1088.

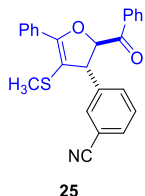

The reaction was conducted on a 1.0 mmol scale according to the general reaction conditions. Column chromatography (eluent = PE/DCM, 100:0 to 2:1) yielded product **25** (91.3 mg, 46% yield) as a yellow solid (m.p. = 93-94 °C).

$^1\text{H}$  NMR (400 MHz,  $\text{CDCl}_3$ )  $\delta$  8.01 (d,  $J = 7.2$  Hz, 2H), 7.95-7.92 (m, 2H), 7.67-7.62 (m, 4H), 7.54-7.49 (m, 3H), 7.40-7.38 (m, 3H), 5.61 (d,  $J = 4.8$  Hz, 1H), 4.80 (d,  $J = 4.8$  Hz, 1H), 2.05 (s, 3H).  $^{13}\text{C}$  NMR (100 MHz,  $\text{CDCl}_3$ )  $\delta$  194.1, 154.5, 143.1, 134.1, 134.0, 132.7, 131.7, 131.4, 129.9, 129.5, 129.3, 129.2, 128.8, 128.1, 127.8, 118.6, 113.1, 106.5, 86.6, 54.1, 16.8. IR (KBr):  $\nu = 2925, 2227, 1693, 1596, 1446, 1216, 1090, 963, 763, 693\text{ cm}^{-1}$ . HRMS:  $m/z$  (ESI) calculated for  $(\text{C}_{25}\text{H}_{20}\text{NO}_2\text{S}) [\text{M}+\text{H}]^+$ : 398.1209 found: 398.1218.

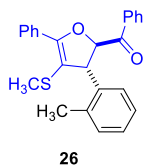

The reaction was conducted on a 1.0 mmol scale according to the general reaction conditions. Column chromatography (eluent = PE/DCM, 100:0 to 2:1) yielded product **26** (121.6 mg, 63% yield) as a yellow solid (m.p. = 105-106 °C).

$^1\text{H}$  NMR (400 MHz,  $\text{CDCl}_3$ )  $\delta$  7.99-7.94 (m, 4H), 7.62-7.58 (m, 1H), 7.48-7.45 (m, 2H), 7.41-7.35 (m, 4H), 7.28-7.20 (m, 3H), 5.64 (d,  $J = 4.4$  Hz, 1H), 5.03 (d,  $J = 4.8$  Hz, 1H), 2.34 (s, 3H), 2.00 (s, 3H).  $^{13}\text{C}$  NMR (100 MHz,  $\text{CDCl}_3$ )  $\delta$  194.9, 153.8, 139.9, 136.0, 134.3, 133.7, 130.6, 129.9, 129.2, 129.1, 128.7, 128.0, 127.8, 127.4, 126.9, 107.5, 87.0, 50.9, 19.6, 17.1. IR (KBr):  $\nu = 2915, 1687, 1595, 1489, 1443, 1216, 1089, 759, 696\text{ cm}^{-1}$ . HRMS:  $m/z$  (ESI) calculated for  $(\text{C}_{25}\text{H}_{23}\text{O}_2\text{S}) [\text{M}+\text{H}]^+$ : 387.1413, found: 387.1422.

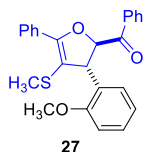

The reaction was conducted on a 1.0 mmol scale according to the general reaction conditions. Column chromatography (eluent = PE/EA, 100:0 to 40:1) yielded product **27** (122.9 mg, 61% yield) as a yellow solid (m.p. = 118-119 °C).

$^1\text{H}$  NMR (400 MHz,  $\text{CDCl}_3$ )  $\delta$  7.98-7.93 (m, 4H), 7.59 (t,  $J = 7.6$  Hz, 1H), 7.46 (t,  $J = 7.6$  Hz, 2H), 7.41-7.28 (m, 5H), 7.04-7.00 (m, 1H), 6.91 (d,  $J = 8.4$  Hz, 1H), 5.65 (d,  $J = 4.8$  Hz, 1H), 5.15 (d,  $J = 4.4$  Hz, 1H), 3.71 (s, 3H), 2.06 (s, 3H).  $^{13}\text{C}$  NMR (100 MHz,  $\text{CDCl}_3$ )  $\delta$  194.9, 156.9, 153.7, 134.4, 133.4, 130.1, 129.4, 129.2, 129.1, 128.9, 128.7, 128.5, 128.0, 127.8, 121.2, 110.6, 106.8, 86.2, 55.3, 47.8, 16.7. IR (KBr):  $\nu = 2920, 1686, 1596, 1490, 1440, 1239, 1092, 1025, 963, 756, 695\text{ cm}^{-1}$ . HRMS:  $m/z$  (ESI) calculated for  $(\text{C}_{25}\text{H}_{23}\text{O}_3\text{S})$   $[\text{M}+\text{H}]^+$ : 403.1362, found: 403.1372.

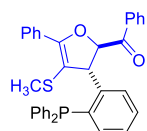

**28**

The reaction was conducted on a 1.0 mmol scale according to the general reaction conditions. Column chromatography (eluent = PE/EA, 100:0 to 40:1) yielded product **28** (147.4 mg, 53% yield) as a light yellow solid (m.p. = 148-149 °C).

$^1\text{H}$  NMR (400 MHz,  $\text{CDCl}_3$ )  $\delta$  7.87-7.82 (m, 4H), 7.52-7.47 (m, 2H), 7.41 (t,  $J = 7.6$  Hz, 1H), 7.35-7.25 (m, 10H), 7.23-7.20 (m, 1H), 7.14-7.12 (m, 4H), 7.08-7.05 (m, 1H), 7.00-6.97 (m, 1H), 5.84 (dd,  $J = 7.6, 2.8$  Hz, 1H), 5.39 (d,  $J = 3.2$  Hz, 1H), 2.00 (s, 3H).  $^{13}\text{C}$  NMR (100 MHz,  $\text{CDCl}_3$ )  $\delta$  192.6, 153.2, 145.9 (d,  $J = 24.5$  Hz), 136.5 (d,  $J = 10.1$  Hz), 136.3 (d,  $J = 13.7$  Hz), 135.9 (d,  $J = 10.1$  Hz), 134.4, 134.1 (d,  $J = 13.0$  Hz), 133.9 (d,  $J = 12.3$  Hz), 133.2, 129.8 (d,  $J = 5.1$  Hz), 129.1, 128.9, 128.6 (d,  $J = 1.5$  Hz), 128.5, 128.4, 128.3, 127.9, 127.7, 127.6, 109.0, 85.3, 50.3 (d,  $J = 28.2$  Hz), 16.9 (d,  $J = 4.3$  Hz).  $^{31}\text{P}$  NMR (162 MHz,  $\text{CDCl}_3$ )  $\delta$  -17.03 (s, 1P). IR (KBr):  $\nu = 3050, 2920, 1690, 1582, 1433, 1228, 1060, 993, 751, 698, 498\text{ cm}^{-1}$ . HRMS:  $m/z$  (ESI) calculated for  $(\text{C}_{36}\text{H}_{30}\text{O}_2\text{PS})$   $[\text{M}+\text{H}]^+$ : 557.1699, found: 557.1714.

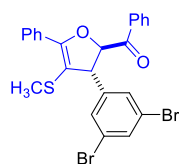

**29**

The reaction was conducted on a 1.0 mmol scale according to the general reaction conditions. Column chromatography (eluent = PE/ $\text{Et}_2\text{O}$ , 100:0 to 40:1) yielded product **29** (132.0 mg, 50% yield) as yellow oil.

$^1\text{H}$  NMR (400 MHz,  $\text{CDCl}_3$ )  $\delta$  8.02-8.00 (m, 2H), 7.95-7.93 (m, 2H), 7.66-7.62 (m, 2H), 7.52 (t,  $J = 8.0$  Hz, 2H), 7.44 (d,  $J = 1.6$  Hz, 2H), 7.42-7.38 (m, 3H), 5.60 (d,  $J = 4.8$  Hz, 1H), 4.70 (d,  $J = 4.8$  Hz, 1H), 2.07 (s, 3H).  $^{13}\text{C}$  NMR (100 MHz,  $\text{CDCl}_3$ )  $\delta$  194.0, 154.6, 145.6, 134.1, 134.0, 133.4, 130.0, 129.5, 129.4, 129.3, 128.8, 128.1, 127.9, 123.5, 106.3, 86.5, 54.0, 16.9. IR (KBr):  $\nu = 3064, 2918, 1686, 1556, 1423, 1229, 1068, 963, 736, 688\text{ cm}^{-1}$ . HRMS:  $m/z$  (ESI) calculated for  $(\text{C}_{24}\text{H}_{19}\text{Br}_2\text{O}_2\text{S})$   $[\text{M}+\text{H}]^+$ : 528.9467, found: 528.9473.

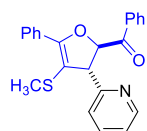

**30**

The reaction was conducted on a 1.0 mmol scale according to the general reaction conditions. Column chromatography (eluent = PE/EA, 100:0 to 4:1) yielded product **30** (111.9 mg, 60% yield) as a light yellow solid (m.p. = 81-82 °C).

$^1\text{H}$  NMR (400 MHz,  $\text{CDCl}_3$ )  $\delta$  8.68-8.67 (m, 1H), 8.07-8.05 (m, 2H), 8.00-7.97 (m, 2H), 7.74-7.70 (m, 1H), 7.59 (t,  $J$  = 7.6 Hz, 1H), 7.49-7.42 (m, 3H), 7.40-7.34 (m, 3H), 7.27-7.23 (m, 1H), 6.16 (d,  $J$  = 5.2 Hz, 1H), 4.87 (d,  $J$  = 5.6 Hz, 1H), 2.01 (s, 3H).  $^{13}\text{C}$  NMR (100 MHz,  $\text{CDCl}_3$ )  $\delta$  194.7, 160.2, 155.0, 149.9, 136.8, 134.2, 133.6, 129.8, 129.23, 129.19, 128.6, 127.94, 127.90, 123.3, 122.5, 106.0, 85.1, 57.0, 17.1. IR (KBr):  $\nu$  = 3057, 2915, 1694, 1586, 1433, 1228, 1110, 958, 772, 688  $\text{cm}^{-1}$ . HRMS:  $m/z$  (ESI) calculated for ( $\text{C}_{23}\text{H}_{20}\text{NO}_2\text{S}$ )  $[\text{M}+\text{H}]^+$ : 374.1209, found: 374.1222.

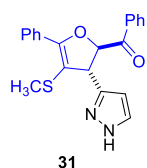

The reaction was conducted on a 1.0 mmol scale according to the general reaction conditions. Column chromatography (eluent = DCM/MeOH, 100:0 to 60:1) yielded product **31** (155.9 mg, 86% yield) as yellow oil.

$^1\text{H}$  NMR (400 MHz,  $\text{CDCl}_3$ )  $\delta$  10.17 (br, 1H), 8.04-8.02 (m, 2H), 7.95-7.93 (m, 2H), 7.60-7.56 (m, 2H), 7.46 (t,  $J$  = 7.6 Hz, 2H), 7.39-7.34 (m, 3H), 6.34 (d,  $J$  = 2.0 Hz, 1H), 5.87 (d,  $J$  = 5.2 Hz, 1H), 4.93 (d,  $J$  = 4.8 Hz, 1H), 2.06 (s, 3H).  $^{13}\text{C}$  NMR (100 MHz,  $\text{CDCl}_3$ )  $\delta$  194.6, 154.0, 150.9, 134.0, 133.7, 131.6, 129.8, 129.22, 129.19, 128.7, 128.0, 127.8, 105.8, 103.9, 85.4, 48.4, 16.9. IR (KBr):  $\nu$  = 3342, 3177, 2918, 1687, 1596, 1492, 1447, 1226, 1065, 963, 768, 691  $\text{cm}^{-1}$ . HRMS:  $m/z$  (ESI) calculated for ( $\text{C}_{21}\text{H}_{19}\text{N}_2\text{O}_2\text{S}$ )  $[\text{M}+\text{H}]^+$ : 363.1162, found: 363.1173.

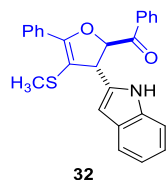

The reaction was conducted on a 1.0 mmol scale according to the general reaction conditions. Column chromatography (eluent = PE/Dioxane, 100:0 to 8:1) yielded product **32** (174.7 mg, 85% yield) as a brown solid (m.p. = 181-182 °C).

$^1\text{H}$  NMR (400 MHz,  $\text{CDCl}_3$ )  $\delta$  8.34 (s, 1H), 8.05-8.03 (m, 2H), 8.01-7.99 (m, 2H), 7.63-7.60 (m, 2H), 7.50 (t,  $J$  = 8.0 Hz, 2H), 7.43-7.36 (m, 4H), 7.21-7.17 (m, 1H), 7.14-7.11 (m, 1H), 6.53 (d,  $J$  = 1.6 Hz, 1H), 5.80 (d,  $J$  = 4.8 Hz, 1H), 4.91 (d,  $J$  = 4.8 Hz, 1H), 2.08 (s, 3H).  $^{13}\text{C}$  NMR (100 MHz,  $\text{CDCl}_3$ )  $\delta$  194.4, 154.2, 137.7, 136.5, 133.9, 133.8, 129.5, 129.4, 129.2, 128.8, 128.4, 128.1, 127.9, 122.1, 120.4, 120.0, 111.0, 104.9, 101.3, 85.3, 49.1, 16.7. IR (KBr):  $\nu$  = 3308, 3057, 2918, 1689, 1596, 1447, 1213, 1093, 963, 751, 688  $\text{cm}^{-1}$ . HRMS:  $m/z$  (ESI) calculated for ( $\text{C}_{26}\text{H}_{22}\text{NO}_2\text{S}$ )  $[\text{M}+\text{H}]^+$ : 412.1366, found: 412.1377.

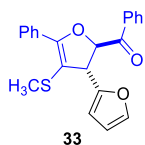

The reaction was conducted on a 1.0 mmol scale according to the general reaction conditions. Column chromatography (eluent = PE/EA, 100:0 to 25:1) yielded product **33** (132.2 mg, 73% yield) as a light yellow solid (m.p. = 109-110 °C).

<sup>1</sup>H NMR (400 MHz, CDCl<sub>3</sub>) δ 8.05-8.03 (m, 2H), 7.97-7.95 (m, 2H), 7.61 (t, *J* = 7.6 Hz, 1H), 7.49 (t, *J* = 7.6 Hz, 2H), 7.45 (d, *J* = 1.2 Hz, 1H), 7.39-7.35 (m, 3H), 6.40 (dd, *J* = 3.2, 2.0 Hz, 1H), 6.34 (d, *J* = 3.2 Hz, 1H), 5.86 (d, *J* = 5.6 Hz, 1H), 4.83 (d, *J* = 5.6 Hz, 1H), 2.03 (s, 3H). <sup>13</sup>C NMR (100 MHz, CDCl<sub>3</sub>) δ 194.2, 154.9, 153.4, 142.4, 134.1, 133.8, 129.7, 129.3, 129.2, 128.7, 128.0, 127.9, 110.8, 108.0, 104.2, 83.7, 49.1, 17.0. IR (KBr): ν = 2920, 1696, 1597, 1443, 1222, 1110, 962, 742, 683 cm<sup>-1</sup>. HRMS: *m/z* (ESI) calculated for (C<sub>22</sub>H<sub>19</sub>O<sub>3</sub>S) [M+H]<sup>+</sup>: 363.1049, found: 363.1060.

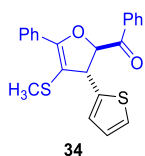

The reaction was conducted on a 1.0 mmol scale according to the general reaction conditions. Column chromatography (eluent = PE/dioxane, 100:0 to 60:1) yielded product **34** (109.5 mg, 58% yield) as a light yellow solid (m.p. = 107-108 °C).

<sup>1</sup>H NMR (400 MHz, CDCl<sub>3</sub>) δ 8.04-8.02 (m, 2H), 7.96-7.94 (m, 2H), 7.60 (t, *J* = 7.6 Hz, 1H), 7.48 (t, *J* = 7.6 Hz, 2H), 7.40-7.35 (m, 3H), 7.29-7.28 (m, 1H), 7.06-7.05 (m, 1H), 7.02-7.00 (m, 1H), 5.74 (d, *J* = 4.8 Hz, 1H), 4.99 (d, *J* = 4.8 Hz, 1H), 2.06 (s, 3H). <sup>13</sup>C NMR (100 MHz, CDCl<sub>3</sub>) δ 194.1, 154.1, 145.1, 134.0, 133.8, 129.7, 129.3, 129.2, 128.7, 128.0, 127.9, 127.1, 125.6, 125.2, 107.0, 86.8, 50.3, 16.9. IR (KBr): ν = 2917, 1696, 1596, 1442, 1215, 1090, 958, 765, 706 cm<sup>-1</sup>. HRMS: *m/z* (ESI) calculated for (C<sub>22</sub>H<sub>19</sub>O<sub>2</sub>S<sub>2</sub>) [M+H]<sup>+</sup>: 379.0821, found: 379.0832.

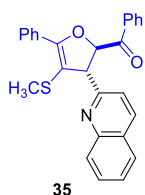

The reaction was conducted on a 1.0 mmol scale according to the general reaction conditions. Column chromatography (eluent = PE/EA, 100:0 to 15:1) yielded product **35** (152.2 mg, 72% yield) as a brown solid (m.p. = 134-135 °C).

<sup>1</sup>H NMR (400 MHz, CDCl<sub>3</sub>) δ 8.21 (d, *J* = 8.4 Hz, 1H), 8.15 (d, *J* = 8.4 Hz, 1H), 8.08 (d, *J* = 8.0 Hz, 2H), 8.02 (d, *J* = 7.6 Hz, 2H), 7.84 (d, *J* = 8.0 Hz, 1H), 7.76-7.71 (m, 1H), 7.62-7.53 (m, 3H), 7.48-7.37 (m, 5H), 6.30 (d, *J* = 4.8 Hz, 1H), 5.04 (d, *J* = 4.4 Hz, 1H), 2.06 (s, 3H). <sup>13</sup>C NMR (100 MHz, CDCl<sub>3</sub>) δ 194.6, 160.5, 155.2, 147.7, 137.3, 134.0, 133.7, 129.8, 129.7, 129.3, 129.26, 128.7, 128.0, 127.6, 127.5, 126.5, 120.6, 105.9, 84.9, 57.8, 17.1. IR (neat): ν = 3051,

2924, 1694, 1595, 1502, 1446, 1219, 1011, 766, 692  $\text{cm}^{-1}$ . HRMS:  $m/z$  (ESI) calculated for  $(\text{C}_{27}\text{H}_{22}\text{NO}_2\text{S})$   $[\text{M}+\text{H}]^+$ : 424.1366, found: 424.1379.

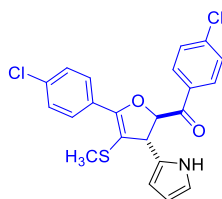

36

The reaction was conducted on a 1.0 mmol scale according to the general reaction conditions. Column chromatography (eluent = PE/DCM, 100:0 to 1:1) yielded product **36** (117.9 mg, 55% yield) as a brown solid (m.p. = 152-153  $^{\circ}\text{C}$ ).

$^1\text{H}$  NMR (400 MHz,  $\text{CDCl}_3$ )  $\delta$  8.37 (br, 1H), 7.96-7.93 (m, 2H), 7.92-7.88 (m, 2H), 7.49-7.46 (m, 2H), 7.37-7.34 (m, 2H), 6.81 (dd,  $J = 4.4, 2.8$  Hz, 1H), 6.22 (dd,  $J = 6.0, 2.8$  Hz, 1H), 6.18-6.16 (m, 1H), 5.66 (d,  $J = 4.8$  Hz, 1H), 4.73 (d,  $J = 5.2$  Hz, 1H), 2.04 (s, 3H).  $^{13}\text{C}$  NMR (100 MHz,  $\text{CDCl}_3$ )  $\delta$  193.3, 152.4, 140.5, 135.1, 132.2, 130.6, 130.2, 129.2, 129.0, 128.3, 128.1, 118.3, 109.0, 106.9, 106.3, 85.6, 48.6, 16.6. IR (KBr):  $\nu = 3024, 2923, 1692, 1592, 1487, 1400, 1229, 1092, 965, 828, 722, 532$   $\text{cm}^{-1}$ . HRMS:  $m/z$  (ESI) calculated for  $(\text{C}_{22}\text{H}_{18}\text{Cl}_2\text{NO}_2\text{S})$   $[\text{M}+\text{H}]^+$ : 430.0430, found: 430.0442.

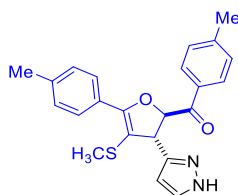

37

The reaction was conducted on a 1.0 mmol scale according to the general reaction conditions. Column chromatography (eluent = PE/EA, 100:0 to 2:1) yielded product **37** (122.9 mg, 63% yield) as yellow oil.

$^1\text{H}$  NMR (400 MHz,  $\text{CDCl}_3$ )  $\delta$  10.40 (br, 1H), 7.92 (d,  $J = 8.4$  Hz, 2H), 7.84 (d,  $J = 8.0$  Hz, 2H), 7.57 (d,  $J = 2.4$  Hz, 1H), 7.24 (d,  $J = 8.0$  Hz, 2H), 7.17 (d,  $J = 8.4$  Hz, 2H), 6.33 (d,  $J = 2.4$  Hz, 1H), 5.83 (d,  $J = 5.2$  Hz, 1H), 4.90 (d,  $J = 5.2$  Hz, 1H), 2.39 (s, 3H), 2.35 (s, 3H), 2.03 (s, 3H).  $^{13}\text{C}$  NMR (100 MHz,  $\text{CDCl}_3$ )  $\delta$  194.2, 154.4, 150.9, 144.7, 139.3, 131.8, 131.5, 129.4, 129.3, 128.7, 127.8, 127.0, 104.7, 103.9, 85.4, 48.3, 21.7, 21.4, 16.9. IR (KBr):  $\nu = 3315, 3174, 2923, 1689, 1607, 1509, 1412, 1230, 1183, 1066, 962, 822, 765, 476$   $\text{cm}^{-1}$ . HRMS:  $m/z$  (ESI) calculated for  $(\text{C}_{23}\text{H}_{23}\text{N}_2\text{O}_2\text{S})$   $[\text{M}+\text{H}]^+$ : 391.1475, found: 391.1481.

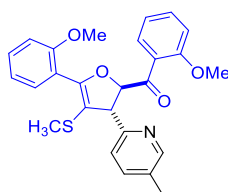

38

The reaction was conducted on a 1.0 mmol scale according to the general reaction conditions. Column chromatography (eluent = PE/EA, 100:0 to 3:1) yielded product **38** (127.4 mg, 57% yield) as yellow oil.

$^1\text{H}$  NMR (400 MHz,  $\text{CDCl}_3$ )  $\delta$  8.45 (s, 1H), 7.91-7.89 (m, 1H), 7.57-7.54 (m, 1H), 7.51-7.43 (m, 3H), 7.36-7.32 (m, 1H), 7.04 (t,  $J = 7.6$  Hz, 1H), 6.96 (t,  $J = 7.6$  Hz, 1H), 6.91 (d,  $J = 8.4$  Hz, 1H), 6.88 (d,  $J = 8.4$  Hz, 1H), 6.08 (d,  $J = 4.0$  Hz, 1H), 4.49 (d,  $J = 4.0$  Hz, 1H), 3.80 (s, 3H), 3.37 (s, 3H), 2.35 (s, 3H), 1.89 (s, 3H).  $^{13}\text{C}$  NMR (100 MHz,  $\text{CDCl}_3$ )  $\delta$  197.1, 159.4, 158.8, 157.4, 154.4, 149.1, 137.6, 134.3, 131.3, 131.2, 131.1, 130.7, 124.6, 121.6, 120.8, 120.1, 119.6, 111.3, 111.1, 108.4, 89.2, 56.9, 55.5, 54.9, 18.1, 16.5. IR (KBr):  $\nu = 2921, 1676, 1595, 1485, 1288, 1245, 1025, 755, 651\text{ cm}^{-1}$ . HRMS:  $m/z$  (ESI) calculated for  $(\text{C}_{26}\text{H}_{26}\text{NO}_4\text{S}) [\text{M}+\text{H}]^+$ : 448.1577, found: 448.1590.

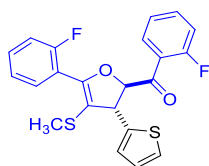

**39**

The reaction was conducted on a 1.0 mmol scale according to the general reaction conditions. Column chromatography (eluent = PE/EA, 100:0 to 40:1) yielded product **39** (138.7 mg, 67% yield) as yellow oil.

$^1\text{H}$  NMR (400 MHz,  $\text{CDCl}_3$ )  $\delta$  7.90-7.86 (m, 1H), 7.61-7.55 (m, 1H), 7.48-7.44 (m, 1H), 7.38-7.33 (m, 1H), 7.30-7.27 (m, 2H), 7.19-7.12 (m, 2H), 7.10-7.06 (m, 2H), 7.02-7.00 (m, 1H), 5.67-5.66 (m, 1H), 4.89 (d,  $J = 1.6$  Hz, 1H), 1.99 (s, 3H).  $^{13}\text{C}$  NMR (100 MHz,  $\text{CDCl}_3$ )  $\delta$  194.3 (d,  $J = 3.6$  Hz), 161.6 (d,  $J = 254.2$  Hz), 160.0 (d,  $J = 251.4$  Hz), 151.3, 144.6, 135.2 (d,  $J = 8.7$  Hz), 131.4 (d,  $J = 7.9$  Hz), 131.2 (d,  $J = 2.9$  Hz), 131.0 (d,  $J = 2.9$  Hz), 127.1, 125.4, 125.1, 124.7 (d,  $J = 3.6$  Hz), 123.7 (d,  $J = 3.7$  Hz), 123.4 (d,  $J = 13.0$  Hz), 117.9 (d,  $J = 13.8$  Hz), 116.5 (d,  $J = 22.4$  Hz), 115.9 (d,  $J = 21.7$  Hz), 110.7, 90.0 (d,  $J = 5.8$  Hz), 49.3, 16.7.  $^{19}\text{F}$  NMR (376 MHz,  $\text{CDCl}_3$ )  $\delta$  -108.27 (d,  $J = 2.63$  Hz, 1F), -110.19 (d,  $J = 4.51$  Hz, 1F). IR (KBr):  $\nu = 2917, 1696, 1610, 1455, 1276, 1220, 1060, 762, 701\text{ cm}^{-1}$ . HRMS:  $m/z$  (ESI) calculated for  $(\text{C}_{22}\text{H}_{17}\text{F}_2\text{O}_2\text{S}) [\text{M}+\text{H}]^+$ : 415.0633, found: 415.0642.

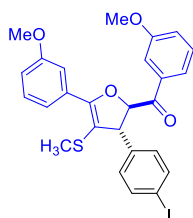

**40**

The reaction was conducted on a 1.0 mmol scale according to the general reaction conditions. Column chromatography (eluent = PE/EA, 100:0 to 25:1) yielded product **40** (139.6 mg, 50% yield) as yellow oil.

$^1\text{H}$  NMR (400 MHz,  $\text{CDCl}_3$ )  $\delta$  7.72 (d,  $J = 8.0$  Hz, 2H), 7.57-7.54 (m, 2H), 7.51-7.50 (m, 2H), 7.37 (t,  $J = 8.4$  Hz, 1H), 7.31 (t,  $J = 8.0$  Hz, 1H), 7.16-7.11 (m, 3H), 6.92 (dd,  $J = 8.4, 2.4$  Hz,



1H), 5.60 (d,  $J = 4.8$  Hz, 1H), 4.57 (d,  $J = 4.8$  Hz, 1H), 3.81 (s, 3H), 3.80 (s, 3H), 2.02 (s, 3H).  $^{13}\text{C}$  NMR (100 MHz,  $\text{CDCl}_3$ )  $\delta$  194.2, 159.8, 159.2, 153.9, 141.1, 138.1, 135.2, 130.8, 130.0, 129.7, 129.1, 121.7, 120.5, 120.3, 115.5, 113.0, 112.8, 107.0, 93.3, 86.7, 55.4, 55.2, 55.1, 16.7. IR (KBr):  $\nu = 2914, 1693, 1577, 1486, 1430, 1265, 1038, 782, 695, 551\text{ cm}^{-1}$ . HRMS:  $m/z$  (ESI) calculated for  $(\text{C}_{26}\text{H}_{24}\text{IO}_4\text{S}) [\text{M}+\text{H}]^+$ : 559.0435, found: 559.0445.

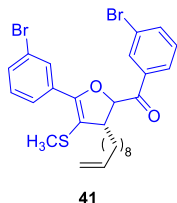

The reaction was conducted on a 1.0 mmol scale according to the general reaction conditions. Column chromatography (eluent = PE/Et<sub>2</sub>O, 100:0 to 60:1) yielded product **41** (233.1 mg, 79% yield) as yellow oil.

$^1\text{H}$  NMR (400 MHz,  $\text{CDCl}_3$ )  $\delta$  8.17 (t,  $J = 1.6$  Hz, 1H), 7.99 (t,  $J = 1.6$  Hz, 1H), 7.96 (d,  $J = 7.6$  Hz, 1H), 7.80 (d,  $J = 8.0$  Hz, 1H), 7.74-7.72 (m, 1H), 7.45-7.42 (m, 1H), 7.38 (t,  $J = 8.0$  Hz, 1H), 7.21 (t,  $J = 8.0$  Hz, 1H), 5.84-5.76 (m, 1H), 5.36 (d,  $J = 4.8$  Hz, 1H), 5.02-4.91 (m, 2H), 3.61-3.57 (m, 1H), 2.17 (s, 3H), 2.06-2.01 (m, 2H), 1.92-1.86 (m, 1H), 1.71-1.66 (m, 1H), 1.39-1.29 (m, 12H).  $^{13}\text{C}$  NMR (100 MHz,  $\text{CDCl}_3$ )  $\delta$  195.1, 150.6, 139.1, 136.3, 132.1, 131.8, 131.7, 130.4, 130.2, 129.5, 127.6, 126.1, 122.9, 122.1, 114.1, 109.2, 84.4, 48.1, 33.7, 32.3, 29.6, 29.44, 29.38, 29.0, 28.8, 26.0, 16.7. IR (KBr):  $\nu = 2924, 1694, 1559, 1467, 1420, 1206, 1070, 909, 786, 688\text{ cm}^{-1}$ . HRMS:  $m/z$  (ESI) calculated for  $(\text{C}_{28}\text{H}_{33}\text{Br}_2\text{O}_2\text{S}) [\text{M}+\text{H}]^+$ : 591.0563, found: 591.0572.

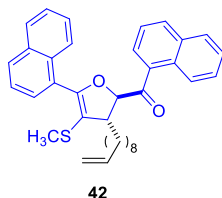

The reaction was conducted on a 1.0 mmol scale according to the general reaction conditions. Column chromatography (eluent = PE/EA, 100:0 to 30:1) yielded product **42** (184.3 mg, 69% yield) as yellow oil.

$^1\text{H}$  NMR (400 MHz,  $\text{CDCl}_3$ )  $\delta$  8.43 (d,  $J = 8.0$  Hz, 1H), 8.21 (d,  $J = 8.4$  Hz, 1H), 8.03 (d,  $J = 8.4$  Hz, 1H), 7.94-7.85 (m, 3H), 7.81 (d,  $J = 8.0$  Hz, 1H), 7.64-7.56 (m, 2H), 7.53-7.41 (m, 4H), 7.32-7.28 (m, 1H), 5.87-5.77 (m, 1H), 5.69 (d,  $J = 4.4$  Hz, 1H), 5.03-4.93 (m, 2H), 3.52-3.47 (m, 1H), 2.06-2.03 (m, 2H), 2.00 (s, 3H), 1.90-1.83 (m, 1H), 1.77-1.72 (m, 1H), 1.43-1.22 (m, 12H).  $^{13}\text{C}$  NMR (100 MHz,  $\text{CDCl}_3$ )  $\delta$  201.1, 155.4, 139.2, 133.9, 133.6, 133.4, 132.7, 131.5, 130.8, 129.9, 129.0, 128.6, 128.11, 128.09, 127.7, 127.5, 126.7, 126.3, 126.1, 125.9, 125.1, 124.7, 124.3, 114.1, 109.2, 86.8, 48.4, 33.8, 33.0, 29.5, 29.4, 29.3, 29.1, 28.9, 25.9, 17.2. IR (KBr):  $\nu = 2920, 1685, 1590, 1506, 1432, 1233, 1180, 1029, 776\text{ cm}^{-1}$ . HRMS:  $m/z$  (ESI) calculated for  $(\text{C}_{36}\text{H}_{39}\text{O}_2\text{S}) [\text{M}+\text{H}]^+$ : 535.2665, found: 535.2678.

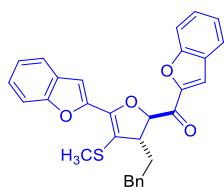

43

The reaction was conducted on a 1.0 mmol scale according to the general reaction conditions. Column chromatography (eluent = PE/EA, 100:0 to 30:1) yielded product **43** (103.2 mg, 43% yield) as yellow oil.

$^1\text{H}$  NMR (400 MHz,  $\text{CDCl}_3$ )  $\delta$  7.94 (s, 1H), 7.72 (d,  $J = 7.6$  Hz, 1H), 7.61-7.55 (m, 3H), 7.51-7.47 (m, 1H), 7.34-7.23 (m, 8H), 7.20-7.16 (m, 1H), 5.45 (d,  $J = 4.4$  Hz, 1H), 3.69-3.64 (m, 1H), 2.94-2.78 (m, 2H), 2.35-2.27 (m, 1H), 2.17 (s, 3H), 2.14-2.06 (m, 1H).  $^{13}\text{C}$  NMR (100 MHz,  $\text{CDCl}_3$ )  $\delta$  187.8, 155.6, 154.4, 150.1, 146.2, 144.6, 141.3, 128.9, 128.5, 128.4, 127.9, 126.9, 126.0, 125.3, 124.0, 123.7, 123.2, 121.4, 116.3, 112.4, 111.5, 110.7, 107.8, 86.0, 49.2, 34.3, 32.2, 16.4. IR (KBr):  $\nu = 2918, 1683, 1547, 1452, 1255, 1163, 1140, 1080, 751, 698, 612, 427\text{ cm}^{-1}$ . HRMS:  $m/z$  (ESI) calculated for  $(\text{C}_{30}\text{H}_{25}\text{O}_4\text{S})$   $[\text{M}+\text{H}]^+$ : 481.1468, found: 481.1478.

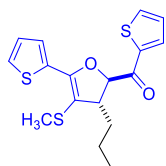

44

The reaction was conducted on a 1.0 mmol scale according to the general reaction conditions. Column chromatography (eluent = PE/EA, 100:0 to 50:1) yielded product **44** (96.3 mg, 55% yield) as cyan oil.

$^1\text{H}$  NMR (400 MHz,  $\text{CDCl}_3$ )  $\delta$  8.03-8.02 (m, 1H), 7.69-7.68 (m, 1H), 7.62-7.61 (m, 1H), 7.38-7.36 (m, 1H), 7.16-7.14 (m, 1H), 7.07-7.05 (m, 1H), 5.17 (d,  $J = 5.6$ , 1H), 3.59-3.55 (m, 1H), 2.20 (s, 3H), 1.95-1.86 (m, 1H), 1.68-1.58 (m, 1H), 1.50-1.40 (m, 2H), 0.98 (t,  $J = 7.6$  Hz, 3H).  $^{13}\text{C}$  NMR (100 MHz,  $\text{CDCl}_3$ )  $\delta$  190.6, 149.7, 140.4, 134.8, 133.9, 131.6, 128.2, 127.6, 127.3, 126.7, 106.4, 87.2, 49.3, 35.1, 19.3, 17.0, 14.1. IR (KBr):  $\nu = 2931, 1659, 1413, 1353, 1242, 1056, 846, 711\text{ cm}^{-1}$ . HRMS:  $m/z$  (ESI) calculated for  $(\text{C}_{17}\text{H}_{19}\text{O}_2\text{S}_3)$   $[\text{M}+\text{H}]^+$ : 351.0542, found: 351.0550.

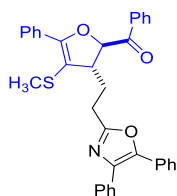

45

The reaction was conducted on a 1.0 mmol scale according to the general reaction conditions. Column chromatography (eluent = PE/EA, 100:0 to 10:1) yielded product **45** (206.4 mg, 76% yield) as yellow oil.

$^1\text{H}$  NMR (400 MHz,  $\text{CDCl}_3$ )  $\delta$  8.06-8.04 (m, 2H), 7.86-7.83 (m, 2H), 7.61-7.54 (m, 5H), 7.47 (t,  $J$  = 8.0 Hz, 2H), 7.37-7.29 (m, 9H), 5.58 (d,  $J$  = 4.4 Hz, 1H), 3.86-3.82 (m, 1H), 3.06 (t,  $J$  = 8.0 Hz, 2H), 2.57-2.49 (m, 1H), 2.39-2.30 (m, 1H), 2.19 (s, 3H).  $^{13}\text{C}$  NMR (100 MHz,  $\text{CDCl}_3$ )  $\delta$  195.6, 162.8, 153.5, 145.2, 135.0, 134.5, 133.5, 132.4, 129.8, 129.11, 129.06, 128.9, 128.7, 128.6, 128.5, 128.3, 127.9, 127.8, 126.4, 106.1, 84.1, 47.1, 29.5, 24.7, 16.9. IR (KBr):  $\nu$  = 3058, 2918, 1693, 1597, 1489, 1445, 1226, 1056, 962, 761, 691  $\text{cm}^{-1}$ . HRMS:  $m/z$  (ESI) calculated for  $(\text{C}_{35}\text{H}_{30}\text{NO}_3\text{S})$   $[\text{M}+\text{H}]^+$ : 544.1941, found: 544.1957.

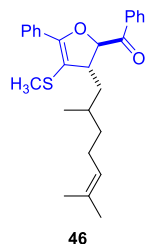

The reaction was conducted on a 1.0 mmol scale according to the general reaction conditions. Column chromatography (eluent = PE/EA, 100:0 to 30:1) yielded product **46** (159.7 mg, 76% yield, d.r. = 1:1) as yellow oil. The diastereoselective ratio was determined by  $^1\text{H}$  NMR spectroscopy of the crude mixture.

$^1\text{H}$  NMR (400 MHz,  $\text{CDCl}_3$ )  $\delta$  8.07 (d,  $J$  = 8.4 Hz, 2H), 7.80-7.78 (m, 2H), 7.60 (t,  $J$  = 7.6 Hz, 1H), 7.50 (t,  $J$  = 7.6 Hz, 2H), 7.35-7.28 (m, 3H), 5.39-5.34 (m, 1H), 5.10-5.05 (m, 1H), 3.76-3.70 (m, 1H), 2.18-2.16 (m, 3H), 2.06-1.75 (m, 3H), 1.67-1.64 (m, 3H), 1.61-1.59 (m, 3H), 1.57-1.11 (m, 4H), 0.99-0.94 (m, 3H).  $^{13}\text{C}$  NMR (100 MHz,  $\text{CDCl}_3$ )  $\delta$  196.6, 196.2, 152.2, 151.8, 135.02, 135.0, 133.4, 131.4, 131.3, 130.1, 129.23, 129.19, 128.82, 128.78, 128.6, 128.57, 127.9, 127.7, 127.67, 124.59, 124.56, 108.44, 108.4, 85.3, 85.1, 45.6, 45.5, 41.0, 40.3, 38.0, 35.8, 30.4, 30.0, 25.7, 25.6, 25.5, 25.2, 20.6, 19.0, 17.7, 17.6, 17.0, 16.8. IR (KBr):  $\nu$  = 2927, 1690, 1596, 1493, 1446, 1225, 1060, 913, 769, 693  $\text{cm}^{-1}$ . HRMS:  $m/z$  (ESI) calculated for  $(\text{C}_{27}\text{H}_{33}\text{O}_2\text{S})$   $[\text{M}+\text{H}]^+$ : 421.2196, found: 421.2203.

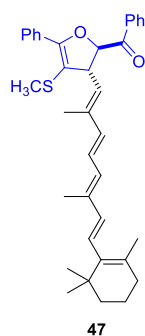

The reaction was conducted on a 1.0 mmol scale according to the general reaction conditions. Column chromatography (eluent = PE/EA, 100:0 to 60:1) yielded product **47** (178.8 mg, 65% yield) as yellow oil.

$^1\text{H}$  NMR (400 MHz,  $\text{CDCl}_3$ )  $\delta$  8.02-8.00 (m, 2H), 7.95-7.93 (m, 2H), 7.61 (t,  $J$  = 7.6 Hz, 1H), 7.49 (t,  $J$  = 7.6 Hz, 2H), 7.40-7.34 (m, 3H), 6.63 (dd,  $J$  = 15.2, 11.2 Hz, 1H), 6.38 (d,  $J$  = 15.2 Hz, 1H), 6.21-6.11 (m, 3H), 5.73 (d,  $J$  = 10.4 Hz, 1H), 5.52 (d,  $J$  = 5.6 Hz, 1H), 4.50 (dd,  $J$  = 10.4, 5.6 Hz, 1H), 2.13 (s, 3H), 2.02 (t,  $J$  = 6.4 Hz, 2H), 1.97 (s, 3H), 1.85 (s, 3H), 1.72 (s, 3H),

1.65-1.58 (m, 2H), 1.48-1.45 (m, 2H), 1.03 (s, 6H).  $^{13}\text{C}$  NMR (100 MHz,  $\text{CDCl}_3$ )  $\delta$  194.9, 154.0, 137.8, 137.6, 137.1, 136.3, 136.27, 134.2, 133.7, 131.3, 130.04, 129.97, 129.3, 129.1, 129.0, 128.7, 128.0, 127.8, 126.8, 125.3, 106.0, 85.1, 49.7, 39.6, 34.2, 33.0, 28.9, 21.7, 19.2, 17.3, 12.8, 12.7. IR (KBr):  $\nu$  = 2920, 1693, 1597, 1493, 1446, 1360, 1226, 965, 766, 692  $\text{cm}^{-1}$ . HRMS:  $m/z$  (ESI) calculated for  $(\text{C}_{37}\text{H}_{43}\text{O}_2\text{S})$   $[\text{M}+\text{H}]^+$ : 551.2978, found: 551.2978.

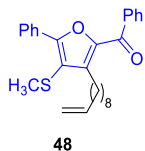

The reaction was conducted on a 1.0 mmol scale according to the general reaction conditions for the one-pot synthesis of multisubstituted furans. Column chromatography (eluent = PE/Et<sub>2</sub>O, 100:0 to 20:1) yielded product **48** (134.0 mg, 62% yield) as yellow oil.

$^1\text{H}$  NMR (400 MHz,  $\text{CDCl}_3$ )  $\delta$  8.24-8.22 (m, 2H), 8.06-8.04 (m, 2H), 7.58 (t,  $J$  = 7.6 Hz, 1H), 7.51 (t,  $J$  = 7.6 Hz, 2H), 7.45 (t,  $J$  = 7.6 Hz, 2H), 7.39 (t,  $J$  = 7.6 Hz, 1H), 5.86-5.76 (m, 1H), 5.01-4.90 (m, 2H), 3.00 (t,  $J$  = 8.0 Hz, 2H), 2.27 (s, 3H), 2.06-2.01 (m, 2H), 1.70-1.63 (m, 2H), 1.50-1.43 (m, 2H), 1.38-1.31 (m, 8H).  $^{13}\text{C}$  NMR (100 MHz,  $\text{CDCl}_3$ )  $\delta$  183.1, 155.4, 146.4, 143.0, 139.2, 138.0, 132.1, 129.7, 129.5, 129.3, 128.7, 128.2, 126.7, 117.8, 114.0, 33.8, 30.0, 29.8, 29.4, 29.3, 29.1, 28.9, 24.9, 19.2. IR (KBr):  $\nu$  = 2920, 2854, 1640, 1560, 1476, 1443, 1296, 1178, 906, 769, 691  $\text{cm}^{-1}$ . HRMS:  $m/z$  (ESI) calculated for  $(\text{C}_{28}\text{H}_{33}\text{O}_2\text{S})$   $[\text{M}+\text{H}]^+$ : 433.2196, found: 433.2202.

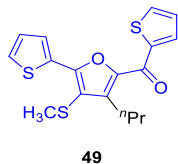

The reaction was conducted on a 1.0 mmol scale according to the general reaction conditions for the one-pot synthesis of multisubstituted furans. Column chromatography (eluent = PE/Et<sub>2</sub>O, 100:0 to 60:1) yielded product **49** (100.9 mg, 58% yield) as a yellow solid (m.p. = 96-97 °C).

$^1\text{H}$  NMR (400 MHz,  $\text{CDCl}_3$ )  $\delta$  8.25 (d,  $J$  = 3.2 Hz, 1H), 7.94 (d,  $J$  = 3.2 Hz, 1H), 7.71 (d,  $J$  = 4.8 Hz, 1H), 7.48 (d,  $J$  = 4.8 Hz, 1H), 7.23 (t,  $J$  = 4.4 Hz, 1H), 7.18 (t,  $J$  = 4.4 Hz, 1H), 2.99 (t,  $J$  = 7.6 Hz, 2H), 2.31 (s, 3H), 1.75-1.65 (m, 2H), 1.06 (t,  $J$  = 7.2 Hz, 3H).  $^{13}\text{C}$  NMR (100 MHz,  $\text{CDCl}_3$ )  $\delta$  173.3, 153.0, 145.4, 142.9, 142.8, 133.7, 133.4, 131.2, 128.2, 128.0, 127.7, 127.3, 116.8, 26.8, 23.2, 19.0, 14.3. IR (KBr):  $\nu$  = 2960, 1607, 1536, 1473, 1409, 1355, 1038, 823, 713  $\text{cm}^{-1}$ . HRMS:  $m/z$  (ESI) calculated for  $(\text{C}_{17}\text{H}_{17}\text{O}_2\text{S}_3)$   $[\text{M}+\text{H}]^+$ : 349.0385, found: 349.0393.

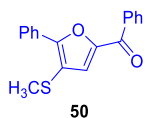

The reaction was conducted on a 2.0 mmol scale according to the general reaction conditions for the one-pot synthesis of multisubstituted furans. Column chromatography (eluent = PE/EA, 100:0 to 40:1) yielded product **50** (135.3 mg, 46% yield) as a yellow solid (m.p. = 73-74 °C).

$^1\text{H}$  NMR (400 MHz,  $\text{CDCl}_3$ )  $\delta$  8.05 (d,  $J = 7.6$  Hz, 2H), 8.02 (d,  $J = 7.6$  Hz, 2H), 7.60 (t,  $J = 7.2$  Hz, 1H), 7.51 (t,  $J = 7.6$  Hz, 2H), 7.46 (t,  $J = 7.6$  Hz, 2H), 7.37 (t,  $J = 7.2$  Hz, 1H), 7.34 (s, 1H), 2.45 (s, 3H).  $^{13}\text{C}$  NMR (100 MHz,  $\text{CDCl}_3$ )  $\delta$  181.7, 153.6, 150.2, 137.1, 132.5, 129.4, 129.2, 129.0, 128.6, 128.4, 126.4, 124.0, 118.1, 17.9. IR (KBr):  $\nu = 3055, 1620, 1547, 1507, 1460, 1437, 1323, 1206, 963, 876, 761, 668\text{ cm}^{-1}$ . HRMS:  $m/z$  (ESI) calculated for ( $\text{C}_{18}\text{H}_{15}\text{O}_2\text{S}$ )  $[\text{M}+\text{H}]^+$ : 295.0787, found: 295.0792.

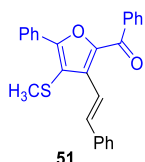

The reaction was conducted on a 1.0 mmol scale according to the general reaction conditions for the one-pot synthesis of multisubstituted furans. Column chromatography (eluent = PE/DCM, 100:0 to 1:1) yielded product **51** (114.9 mg, 58% yield) as a yellow solid (m.p. = 156-157 °C).

$^1\text{H}$  NMR (400 MHz,  $\text{CDCl}_3$ )  $\delta$  8.23-8.16 (m, 3H), 8.03 (d,  $J = 7.2$  Hz, 2H), 7.85 (d,  $J = 16.8$  Hz, 1H), 7.62 (d,  $J = 7.2$  Hz, 2H), 7.58 (d,  $J = 7.2$  Hz, 1H), 7.53-7.42 (m, 5H), 7.39 (t,  $J = 7.6$  Hz, 2H), 7.32-7.29 (m, 1H), 2.33 (s, 3H).  $^{13}\text{C}$  NMR (100 MHz,  $\text{CDCl}_3$ )  $\delta$  183.8, 156.4, 146.5, 138.2, 137.4, 136.0, 135.1, 132.3, 129.6, 129.3, 128.7, 128.6, 128.4, 128.2, 127.4, 127.0, 118.4, 115.6, 18.7. IR (KBr):  $\nu = 3054, 2915, 1636, 1513, 1475, 1442, 1245, 973, 908, 756, 688\text{ cm}^{-1}$ . HRMS:  $m/z$  (ESI) calculated for ( $\text{C}_{26}\text{H}_{21}\text{O}_2\text{S}$ )  $[\text{M}+\text{H}]^+$ : 397.1257, found: 397.1261.

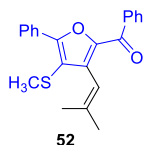

The reaction was conducted on a 1.0 mmol scale according to the general reaction conditions for the one-pot synthesis of multisubstituted furans. Column chromatography (eluent = PE/EA, 100:0 to 60:1) yielded product **52** (104.4 mg, 60% yield) as a yellow solid (m.p. = 130-131 °C).

$^1\text{H}$  NMR (400 MHz,  $\text{CDCl}_3$ )  $\delta$  8.20 (d,  $J = 7.6$  Hz, 2H), 7.99 (d,  $J = 7.2$  Hz, 2H), 7.56 (t,  $J = 7.2$  Hz, 1H), 7.49 (d,  $J = 7.6$  Hz, 2H), 7.45 (d,  $J = 7.6$  Hz, 2H), 7.39 (t,  $J = 7.2$  Hz, 1H), 6.21 (s, 1H), 2.24 (s, 3H), 1.91 (s, 3H), 1.63 (s, 3H).  $^{13}\text{C}$  NMR (100 MHz,  $\text{CDCl}_3$ )  $\delta$  183.1, 155.2, 146.0, 141.5, 137.9, 136.8, 132.1, 129.54, 129.48, 129.3, 128.6, 128.0, 126.9, 117.6, 114.2, 25.9, 20.5, 18.5. IR (KBr):  $\nu = 3067, 2913, 1639, 1526, 1446, 1298, 1178, 908, 839, 765, 692\text{ cm}^{-1}$ . HRMS:  $m/z$  (ESI) calculated for ( $\text{C}_{22}\text{H}_{21}\text{O}_2\text{S}$ )  $[\text{M}+\text{H}]^+$ : 349.1257, found: 349.1266.

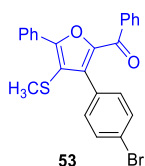

The reaction was conducted on a 1.0 mmol scale according to the general reaction conditions for the one-pot synthesis of multisubstituted furans. Column chromatography (eluent = PE/ $\text{Et}_2\text{O}$ , 100:0 to 60:1) yielded product **53** (134.4 mg, 60% yield) as a yellow solid (m.p. = 130-131 °C).

$^1\text{H}$  NMR (400 MHz,  $\text{CDCl}_3$ )  $\delta$  8.23-8.21 (m, 2H), 7.91-7.89 (m, 2H), 7.53-7.46 (m, 5H), 7.44-7.36 (m, 5H), 1.98 (s, 3H).  $^{13}\text{C}$  NMR (100 MHz,  $\text{CDCl}_3$ )  $\delta$  182.9, 155.8, 146.0, 138.2, 137.2, 132.4, 131.7, 131.1, 129.9, 129.6, 129.2, 128.7, 128.1, 127.1, 122.6, 116.9, 18.5. IR (KBr):  $\nu$  = 2924, 1640, 1482, 1443, 1276, 1009, 893, 736, 689  $\text{cm}^{-1}$ . HRMS:  $m/z$  (ESI) calculated for  $(\text{C}_{24}\text{H}_{18}\text{BrO}_2\text{S})$   $[\text{M}+\text{H}]^+$ : 449.0205, found: 449.0214.

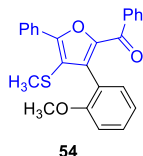

The reaction was conducted on a 1.0 mmol scale according to the general reaction conditions for the one-pot synthesis of multisubstituted furans. Column chromatography (eluent = PE/EA, 100:0 to 20:1) yielded product **54** (128.1 mg, 64% yield) as a yellow solid (m.p. = 115-116  $^{\circ}\text{C}$ ).

$^1\text{H}$  NMR (400 MHz,  $\text{CDCl}_3$ )  $\delta$  8.30-8.27 (m, 2H), 7.82-7.80 (m, 2H), 7.47 (t,  $J$  = 7.6 Hz, 2H), 7.40 (t,  $J$  = 7.6 Hz, 2H), 7.30-7.26 (m, 4H), 6.97-6.93 (m, 1H), 6.80-6.78 (m, 1H), 3.66 (s, 3H), 2.00 (s, 3H).  $^{13}\text{C}$  NMR (100 MHz,  $\text{CDCl}_3$ )  $\delta$  183.3, 156.7, 155.6, 146.4, 137.3, 135.7, 131.9, 131.2, 129.8, 129.6, 129.22, 129.17, 128.5, 127.6, 126.9, 120.5, 120.1, 117.7, 110.4, 55.2, 18.3. IR (KBr):  $\nu$  = 2918, 1640, 1597, 1496, 1446, 1246, 1013, 893, 761, 721, 686  $\text{cm}^{-1}$ . HRMS:  $m/z$  (ESI) calculated for  $(\text{C}_{25}\text{H}_{21}\text{O}_3\text{S})$   $[\text{M}+\text{H}]^+$ : 401.1206, found: 401.1217.

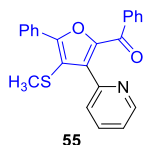

The reaction was conducted on a 1.0 mmol scale according to the general reaction conditions for the one-pot synthesis of multisubstituted furans. Column chromatography (eluent = PE/EA, 100:0 to 50:1) yielded product **55** (113.2 mg, 61% yield) as a brown foam (m.p. = 122-123  $^{\circ}\text{C}$ ).

$^1\text{H}$  NMR (400 MHz,  $\text{CDCl}_3$ )  $\delta$  8.66 (d,  $J$  = 4.4 Hz, 1H), 8.24 (d,  $J$  = 7.6 Hz, 2H), 7.88 (d,  $J$  = 7.6 Hz, 2H), 7.70-7.66 (m, 1H), 7.50-7.40 (m, 5H), 7.36 (t,  $J$  = 7.6 Hz, 2H), 7.26-7.23 (m, 1H), 2.13 (s, 3H).  $^{13}\text{C}$  NMR (100 MHz,  $\text{CDCl}_3$ )  $\delta$  182.8, 155.9, 151.0, 149.3, 146.8, 138.8, 137.1, 135.8, 132.3, 129.48, 129.36, 129.2, 128.6, 128.0, 127.1, 125.6, 122.7, 117.0, 19.0. IR (KBr):  $\nu$  = 3058, 2921, 1652, 1593, 1482, 1370, 1300, 1249, 1173, 893, 722, 693  $\text{cm}^{-1}$ . HRMS:  $m/z$  (ESI) calculated for  $(\text{C}_{23}\text{H}_{18}\text{NO}_2\text{S})$   $[\text{M}+\text{H}]^+$ : 372.1053, found: 372.1067.

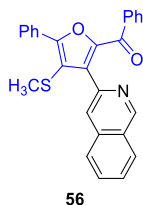

The reaction was conducted on a 1.0 mmol scale according to the general reaction conditions for the one-pot synthesis of multisubstituted furans. Column chromatography (eluent = PE/EA, 100:0 to 10:1) yielded product **56** (147.4 mg, 70% yield) as a brown solid (m.p. = 150-151  $^{\circ}\text{C}$ ).

$^1\text{H}$  NMR (400 MHz,  $\text{CDCl}_3$ )  $\delta$  8.26 (d,  $J = 7.2$  Hz, 2H), 8.15 (d,  $J = 8.4$  Hz, 1H), 8.09 (d,  $J = 8.4$  Hz, 1H), 7.93 (d,  $J = 7.2$  Hz, 2H), 7.81 (d,  $J = 8.0$  Hz, 1H), 7.71-7.67 (m, 1H), 7.60 (d,  $J = 8.0$  Hz, 1H), 7.55-7.47 (m, 3H), 7.44-7.36 (m, 2H), 7.30 (t,  $J = 7.6$  Hz, 2H), 2.20 (s, 3H).  $^{13}\text{C}$  NMR (100 MHz,  $\text{CDCl}_3$ )  $\delta$  182.6, 156.2, 151.7, 147.7, 147.0, 139.5, 137.0, 135.7, 132.2, 129.5, 129.44, 129.37, 129.2, 128.6, 128.0, 127.5, 127.1, 127.0, 126.8, 123.0, 117.2, 19.2. IR (KBr):  $\nu = 3061, 2923, 1645, 1600, 1476, 1445, 1370, 1259, 896, 691\text{ cm}^{-1}$ . HRMS:  $m/z$  (ESI) calculated for ( $\text{C}_{27}\text{H}_{20}\text{NO}_2\text{S}$ )  $[\text{M}+\text{H}]^+$ : 422.1209, found: 422.1218.

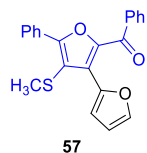

The reaction was conducted on a 1.0 mmol scale according to the general reaction conditions for the one-pot synthesis of multisubstituted furans. Column chromatography (eluent = PE/DCM, 100:0 to 3:1) yielded product **57** (115.2 mg, 64% yield) as a yellow solid (m.p. = 110-111  $^{\circ}\text{C}$ ).

$^1\text{H}$  NMR (400 MHz,  $\text{CDCl}_3$ )  $\delta$  8.19 (d,  $J = 7.2$  Hz, 2H), 7.89 (d,  $J = 7.2$  Hz, 2H), 7.54-7.40 (m, 7H), 7.10 (d,  $J = 3.2$  Hz, 1H), 6.48 (q,  $J = 1.6$  Hz, 1H), 2.21 (s, 3H).  $^{13}\text{C}$  NMR (100 MHz,  $\text{CDCl}_3$ )  $\delta$  183.2, 156.1, 146.0, 144.2, 143.2, 137.5, 132.4, 129.5, 129.4, 129.2, 128.6, 128.1, 128.0, 127.3, 115.6, 113.0, 111.4, 18.9. IR (KBr):  $\nu = 3068, 2918, 1649, 1593, 1462, 1246, 1176, 1018, 912, 873, 739, 693\text{ cm}^{-1}$ . HRMS:  $m/z$  (ESI) calculated for ( $\text{C}_{22}\text{H}_{17}\text{O}_3\text{S}$ )  $[\text{M}+\text{H}]^+$ : 361.0893, found: 361.0903.

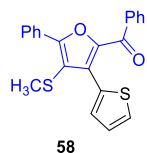

The reaction was conducted on a 1.0 mmol scale according to the general reaction conditions for the one-pot synthesis of multisubstituted furans. Column chromatography (eluent = PE/ $\text{Et}_2\text{O}$ , 100:0 to 60:1) yielded product **58** (110.9 mg, 59% yield) as a brown solid (m.p. = 98-99  $^{\circ}\text{C}$ ).

$^1\text{H}$  NMR (400 MHz,  $\text{CDCl}_3$ )  $\delta$  8.21-8.19 (m, 2H), 7.91-7.89 (m, 2H), 7.52-7.38 (m, 8H), 7.04 (dd,  $J = 5.2, 3.6$  Hz, 1H), 2.09 (s, 3H).  $^{13}\text{C}$  NMR (100 MHz,  $\text{CDCl}_3$ )  $\delta$  183.2, 156.0, 146.2, 137.4, 132.4, 132.0, 130.4, 130.2, 129.6, 129.2, 128.6, 128.1, 127.8, 127.2, 126.7, 116.9, 18.7. IR (KBr):  $\nu = 2918, 1640, 1596, 1473, 1445, 1273, 1242, 1180, 949, 882, 691\text{ cm}^{-1}$ . HRMS:  $m/z$  (ESI) calculated for ( $\text{C}_{22}\text{H}_{17}\text{O}_2\text{S}_2$ )  $[\text{M}+\text{H}]^+$ : 377.0665, found: 377.0676.

## 10. Single Crystal X-Ray Diffraction Data (9 and 53)

A crystal structure of **9** was obtained by recrystallization from PE and DCM.

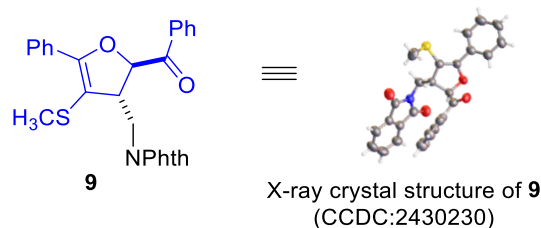

**Table S11 Crystal data and structure refinement for 20231124c.**

|                                             |                                                               |
|---------------------------------------------|---------------------------------------------------------------|
| Identification code                         | 20231124c                                                     |
| Empirical formula                           | C <sub>27</sub> H <sub>21</sub> NO <sub>4</sub> S             |
| Formula weight                              | 455.51                                                        |
| Temperature/K                               | 296.15                                                        |
| Crystal system                              | orthorhombic                                                  |
| Space group                                 | Pna2 <sub>1</sub>                                             |
| a/Å                                         | 16.0438(14)                                                   |
| b/Å                                         | 20.1986(17)                                                   |
| c/Å                                         | 14.2693(13)                                                   |
| α/°                                         | 90                                                            |
| β/°                                         | 90                                                            |
| γ/°                                         | 90                                                            |
| Volume/Å <sup>3</sup>                       | 4624.1(7)                                                     |
| Z                                           | 8                                                             |
| ρ <sub>calc</sub> /g/cm <sup>3</sup>        | 1.309                                                         |
| μ/mm <sup>-1</sup>                          | 0.174                                                         |
| F(000)                                      | 1904.0                                                        |
| Crystal size/mm <sup>3</sup>                | 0.15 × 0.13 × 0.12                                            |
| Radiation                                   | MoKα (λ = 0.71073)                                            |
| 2θ range for data collection/°              | 5.464 to 50.352                                               |
| Index ranges                                | -19 ≤ h ≤ 19, -24 ≤ k ≤ 24, -17 ≤ l ≤ 17                      |
| Reflections collected                       | 237933                                                        |
| Independent reflections                     | 8223 [R <sub>int</sub> = 0.1444, R <sub>sigma</sub> = 0.0325] |
| Data/restraints/parameters                  | 8223/228/601                                                  |
| Goodness-of-fit on F <sup>2</sup>           | 1.071                                                         |
| Final R indexes [I ≥ 2σ (I)]                | R <sub>1</sub> = 0.0489, wR <sub>2</sub> = 0.1033             |
| Final R indexes [all data]                  | R <sub>1</sub> = 0.0787, wR <sub>2</sub> = 0.1187             |
| Largest diff. peak/hole / e Å <sup>-3</sup> | 0.17/-0.19                                                    |

A crystal structure of **53** was obtained by recrystallization from PE and EtOH.

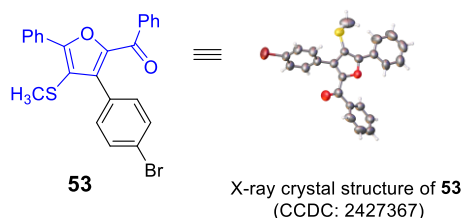

**Table S12 Crystal data and structure refinement for 20240327b.**

|                     |                                                    |
|---------------------|----------------------------------------------------|
| Identification code | 20240327b                                          |
| Empirical formula   | C <sub>24</sub> H <sub>17</sub> BrO <sub>2</sub> S |
| Formula weight      | 449.34                                             |
| Temperature/K       | 296.15(10)                                         |
| Crystal system      | triclinic                                          |
| Space group         | P-1                                                |



|                                                |                                                                |
|------------------------------------------------|----------------------------------------------------------------|
| a/Å                                            | 9.778(3)                                                       |
| b/Å                                            | 14.662(5)                                                      |
| c/Å                                            | 15.350(5)                                                      |
| $\alpha/^\circ$                                | 89.547(8)                                                      |
| $\beta/^\circ$                                 | 78.444(7)                                                      |
| $\gamma/^\circ$                                | 73.771(7)                                                      |
| Volume/Å <sup>3</sup>                          | 2067.5(11)                                                     |
| Z                                              | 4                                                              |
| $\rho_{\text{calc}}/\text{g cm}^{-3}$          | 1.444                                                          |
| $\mu/\text{mm}^{-1}$                           | 2.106                                                          |
| F(000)                                         | 912.0                                                          |
| Crystal size/mm <sup>3</sup>                   | 0.25 × 0.23 × 0.22                                             |
| Radiation                                      | MoK $\alpha$ ( $\lambda$ = 0.71073)                            |
| 2 $\Theta$ range for data collection/ $^\circ$ | 5.424 to 50.05                                                 |
| Index ranges                                   | -11 ≤ h ≤ 11, -17 ≤ k ≤ 17, -18 ≤ l ≤ 18                       |
| Reflections collected                          | 64006                                                          |
| Independent reflections                        | 7273 [ $R_{\text{int}}$ = 0.0920, $R_{\text{sigma}}$ = 0.0499] |
| Data/restraints/parameters                     | 7273/301/590                                                   |
| Goodness-of-fit on F <sup>2</sup>              | 1.012                                                          |
| Final R indexes [ $I \geq 2\sigma(I)$ ]        | $R_1$ = 0.0536, $wR_2$ = 0.1122                                |
| Final R indexes [all data]                     | $R_1$ = 0.1181, $wR_2$ = 0.1404                                |
| Largest diff. peak/hole / e Å <sup>-3</sup>    | 0.63/-0.58                                                     |

## 11. References

- [S1] (a) Ratts, K. W.; Yao, A. N. *J. Org. Chem.* **1966**, *31*, 1185-1188. (b) Payne, G. *J. Org. Chem.* **1967**, *32*, 3351-3355. (c) Dong, J.; Du, H.; Xu, J. *J. Org. Chem.* **2019**, *84*, 10724-10739. (d) Wang, N.; Jia, Y.; Qin, H.; Jiang, Z.-x.; Yang, Z. *Org. Lett.* **2020**, *22*, 7378-7382. (e) Pagire, S. K.; Kumagai, N.; Shibasaki, M. *ACS Catal.* **2021**, *11*, 11597-11606. (f) Ushakov, P. Y.; Khatuntseva, E. A.; Nelyubina, Y. V.; Tabolin, A. A.; Ioffe, S. L.; Sukhorukov, A. Y. *Adv. Synth. Catal.* **2019**, *361*, 5322-5327.
- [S2] (a) Gosselck, J.; Béress, L.; Schenk, H.; Schmidt, G. *Angew. Chem. Int. Ed.* **1965**, *4*, 1080. (b) Ling, X.; Zhao, Q.; Liu, X.; Wang, Y.; Su, Y.; Yang, F.; Zhang, Z.; Wang, H.; Shang, Y.; Fu, L. *Chem. Eur. J.*, **2025**, *31*, e202500471.

## 12. NMR Spectra of Products

$^1\text{H}$  NMR spectrum of product **3** (400 MHz,  $\text{CDCl}_3$ )

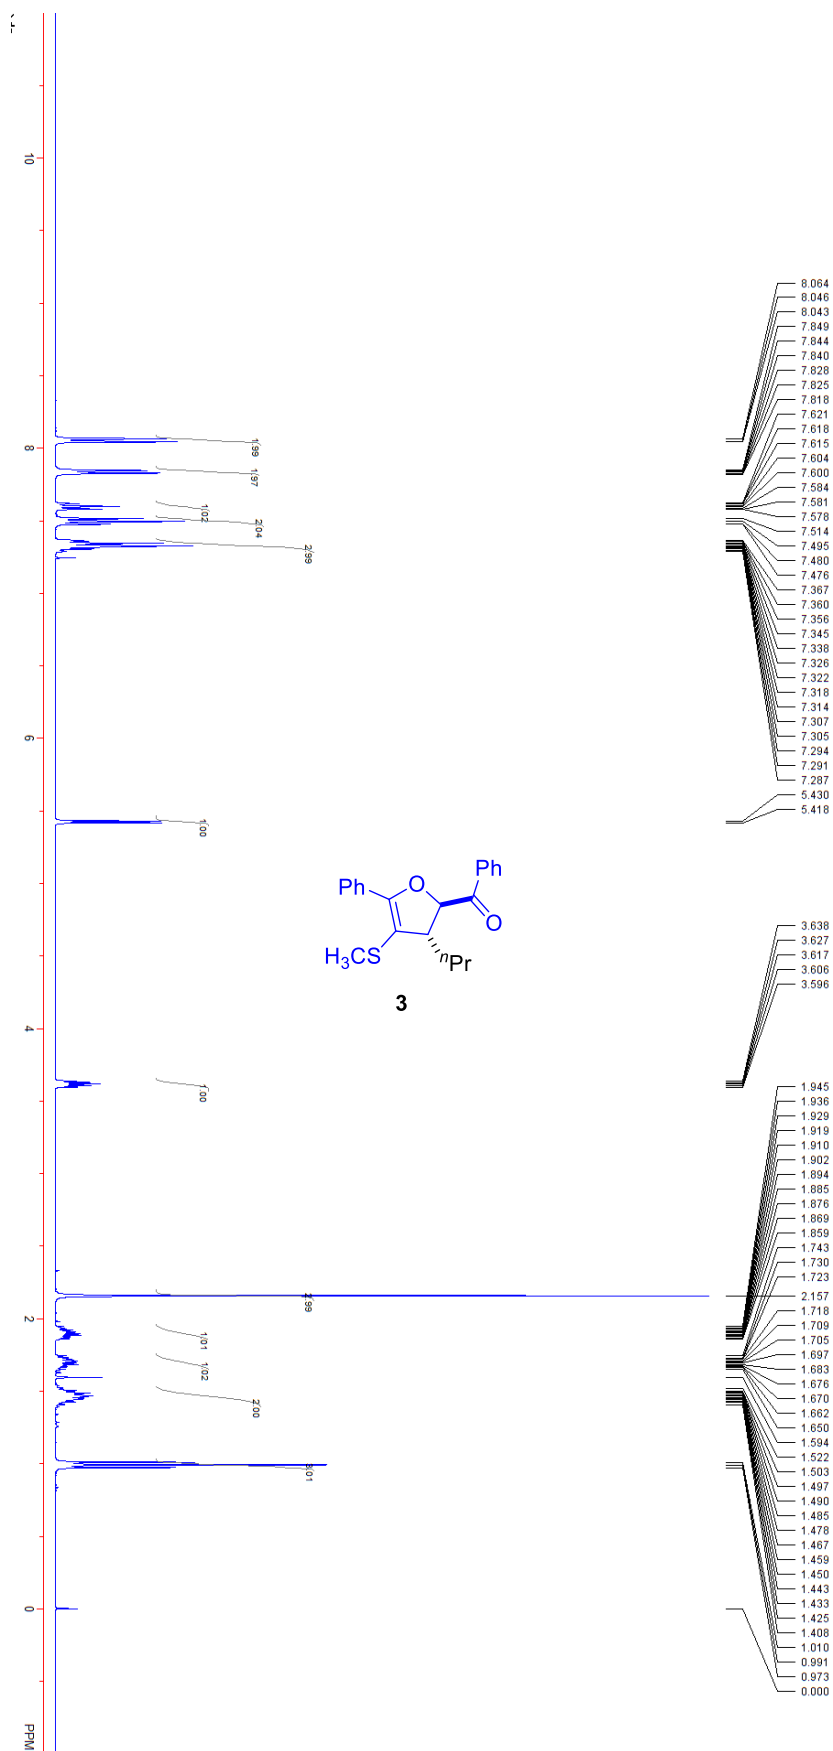

$^{13}\text{C}$  NMR spectrum of product **3** (100 MHz,  $\text{CDCl}_3$ )

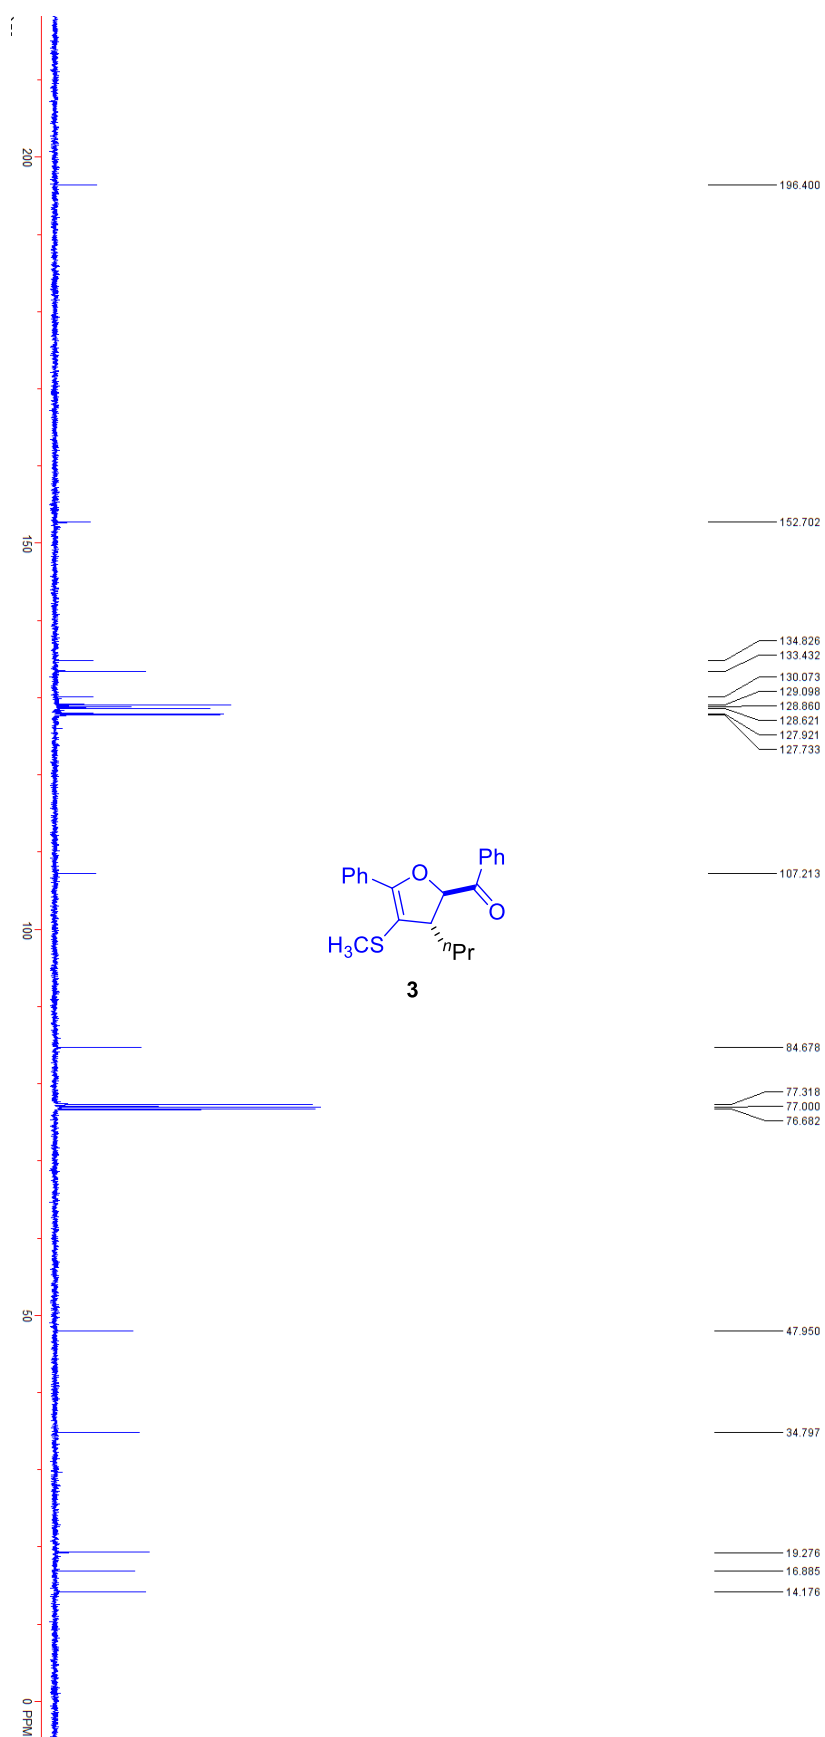

$^1\text{H}$  NMR spectrum of product **4** (400 MHz,  $\text{CDCl}_3$ )

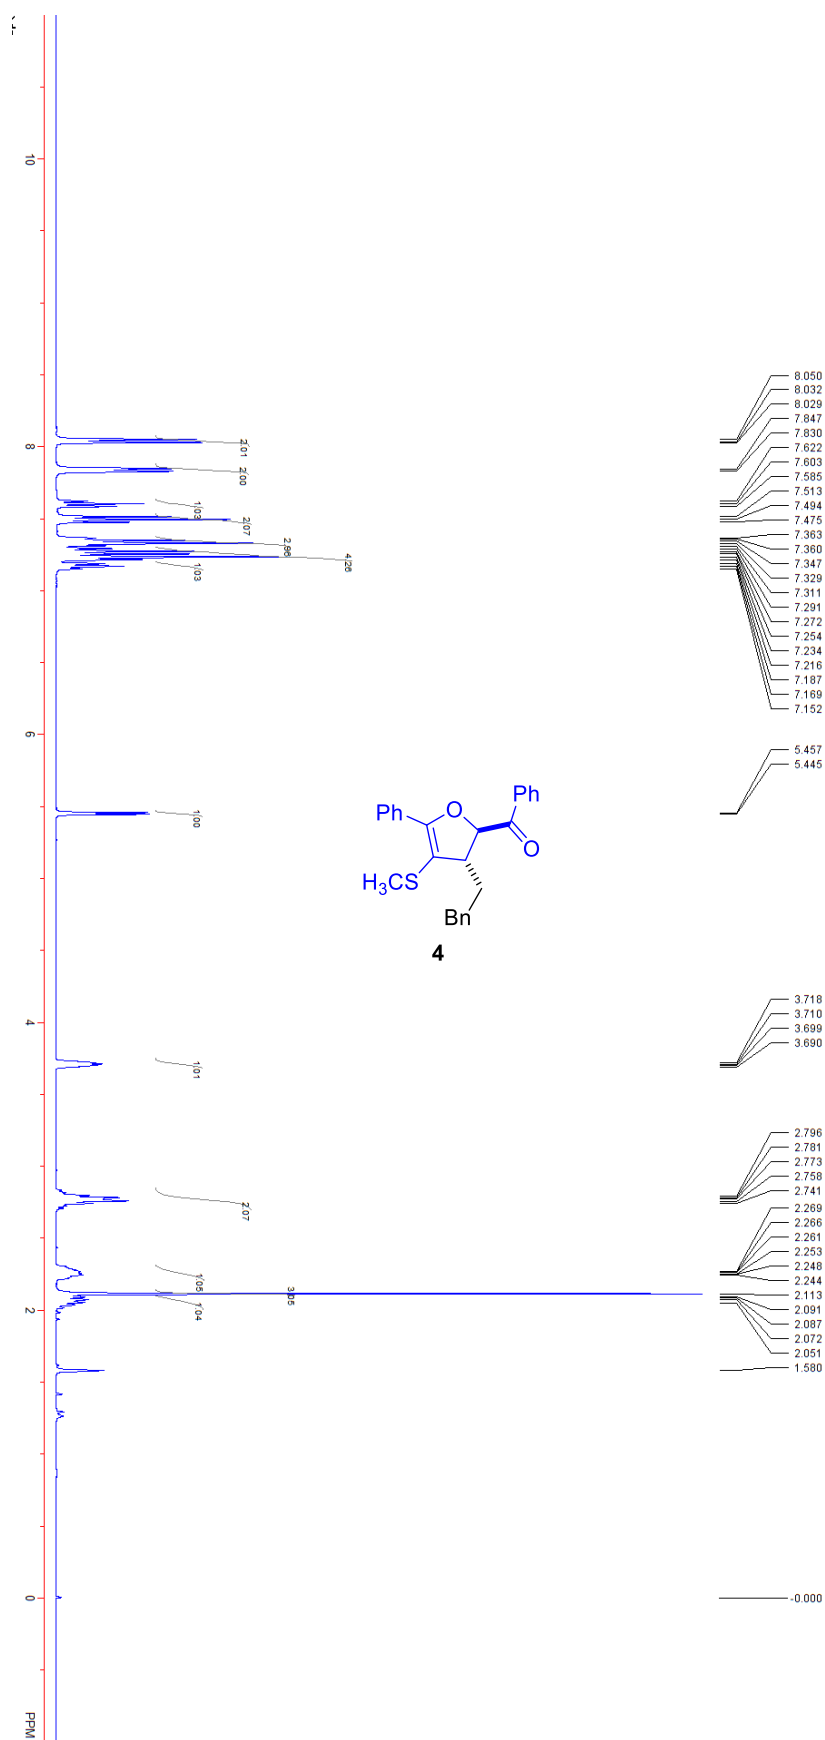

$^{13}\text{C}$  NMR spectrum of product **4** (100 MHz,  $\text{CDCl}_3$ )

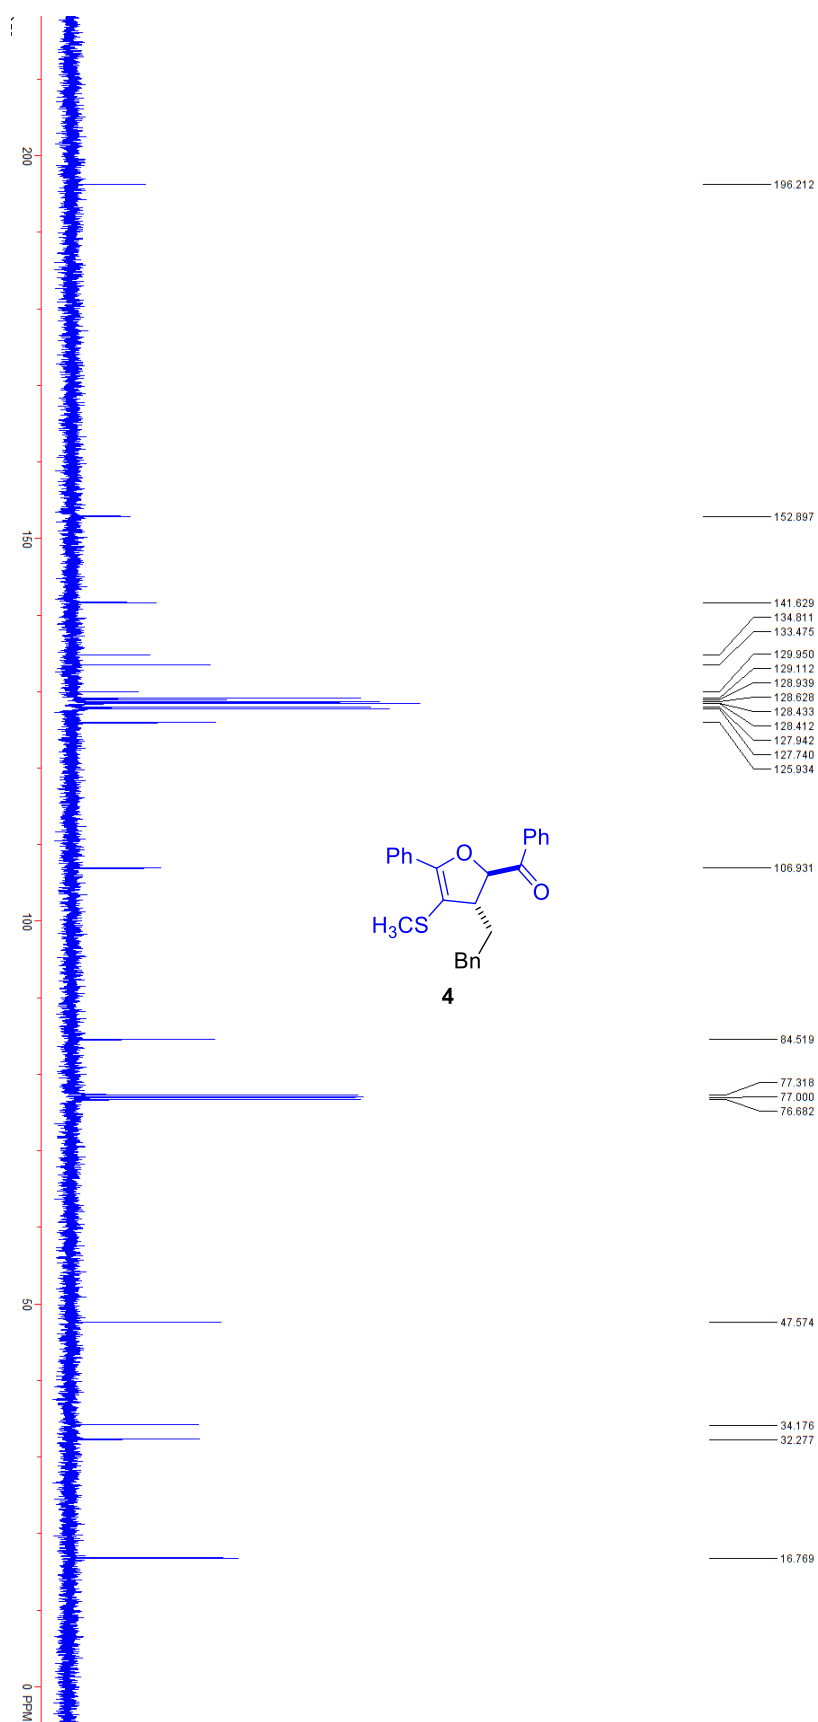

$^1\text{H}$  NMR spectrum of product **5** (400 MHz,  $\text{CDCl}_3$ )

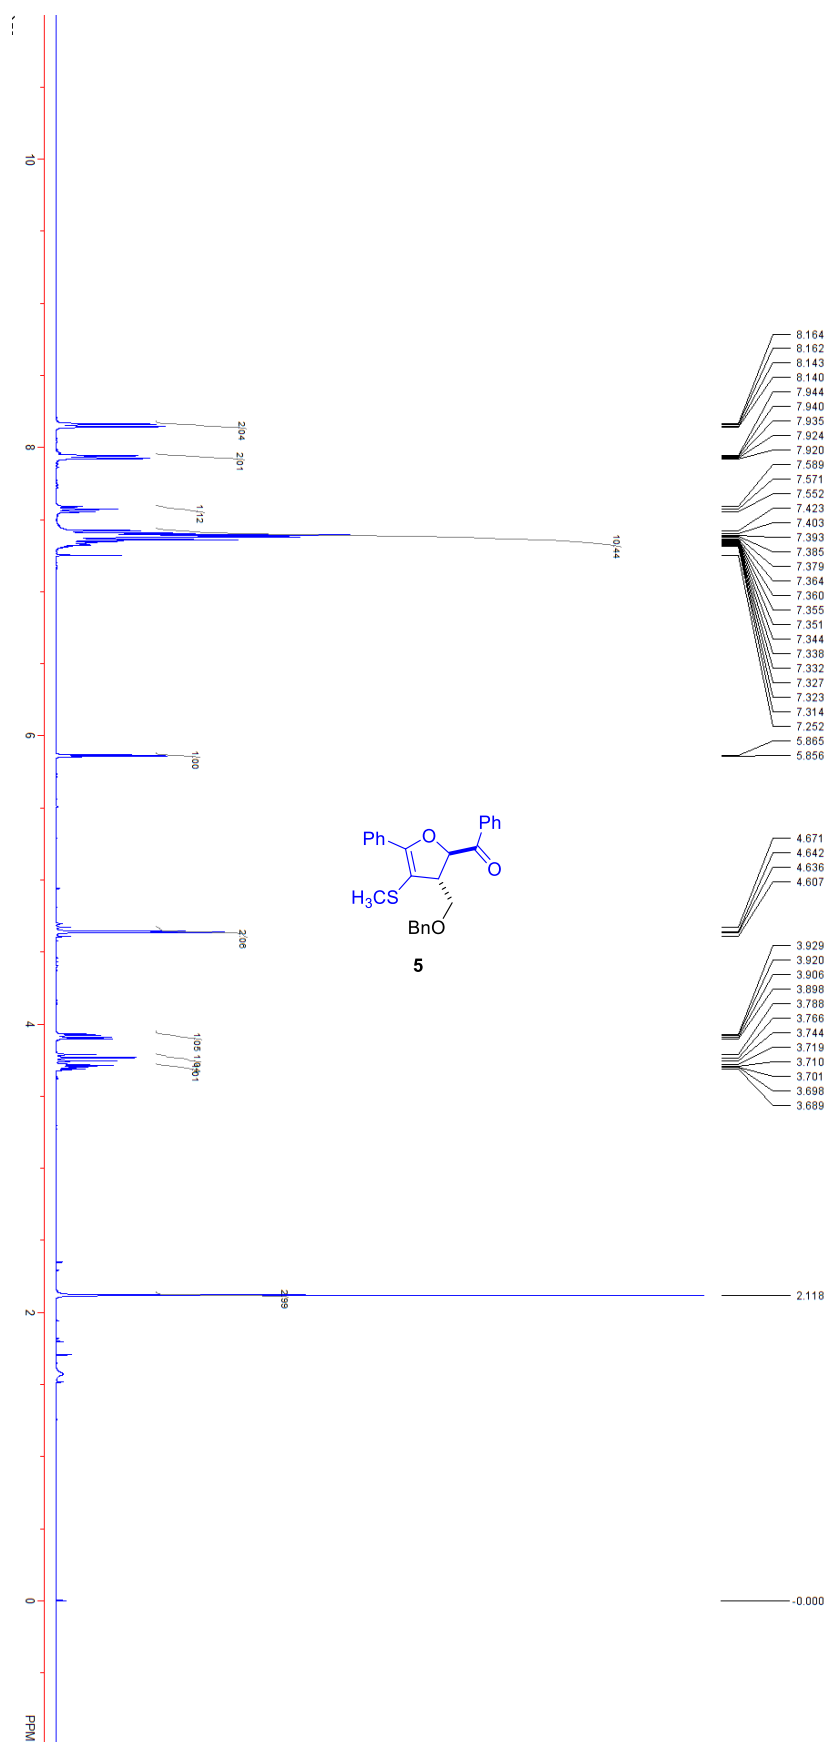

$^{13}\text{C}$  NMR spectrum of product **5** (100 MHz,  $\text{CDCl}_3$ )

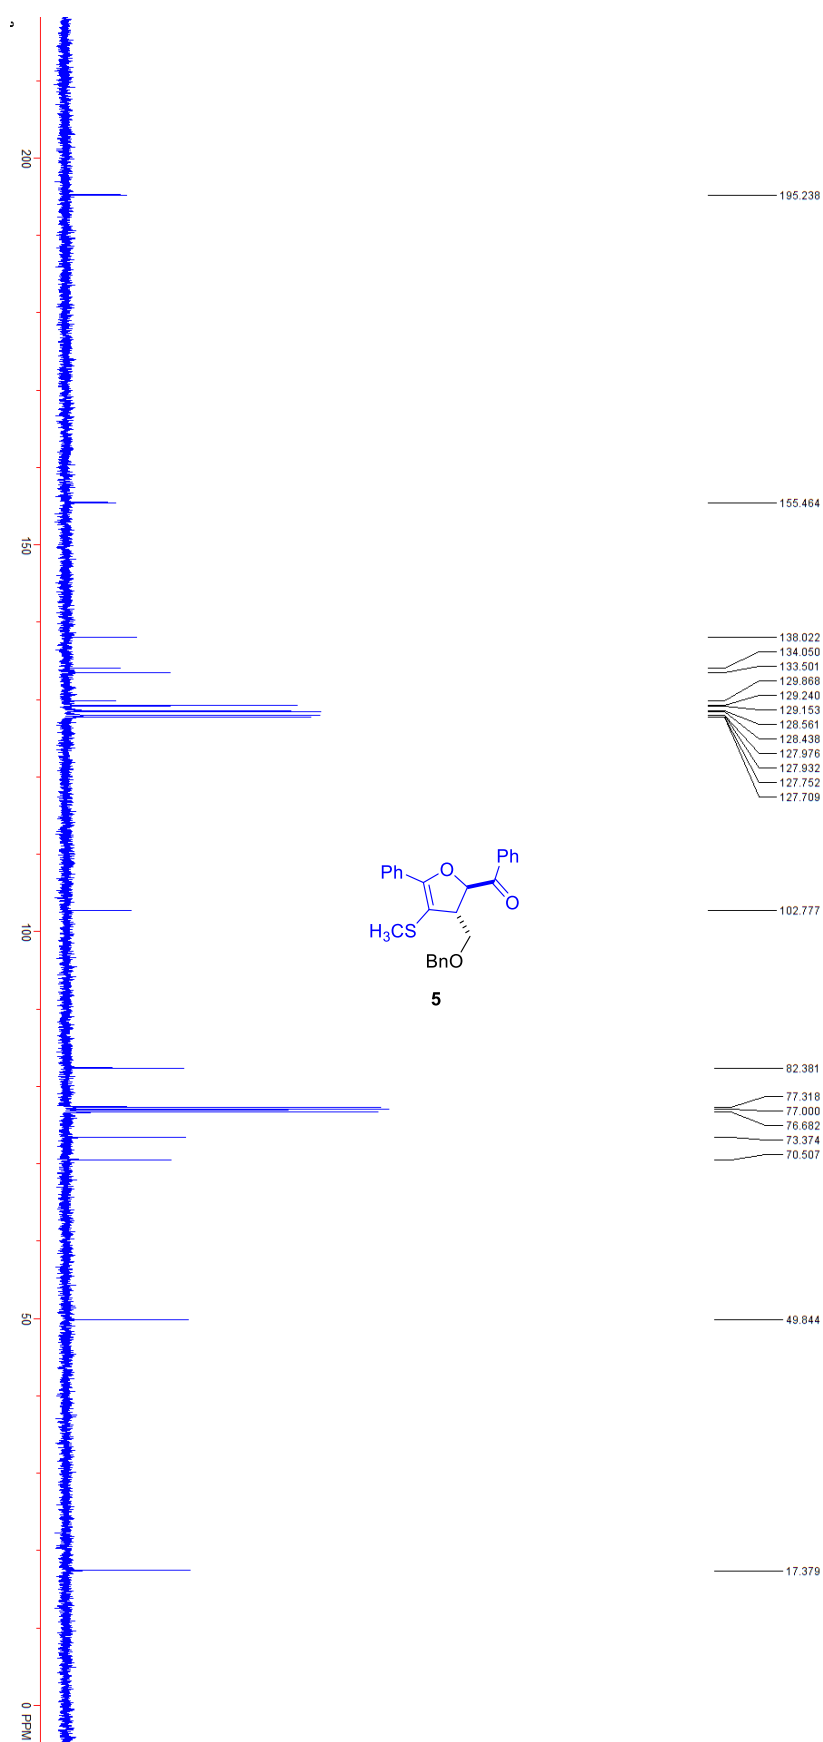

$^1\text{H}$  NMR spectrum of product **6** (400 MHz,  $\text{CDCl}_3$ )

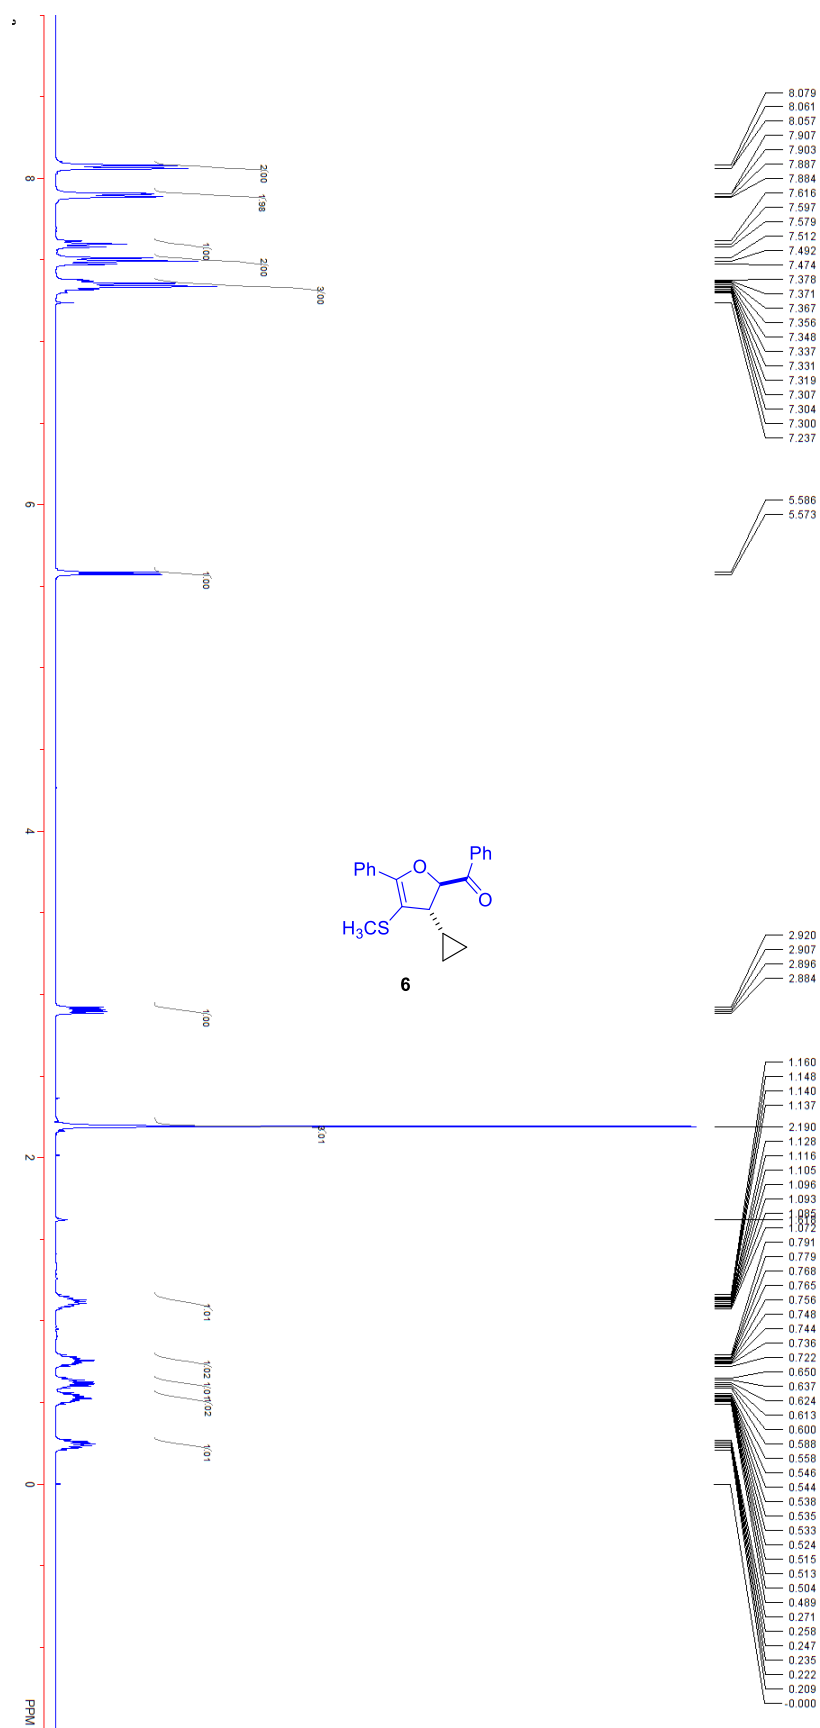



$^{13}\text{C}$  NMR spectrum of product **6** (100 MHz,  $\text{CDCl}_3$ )

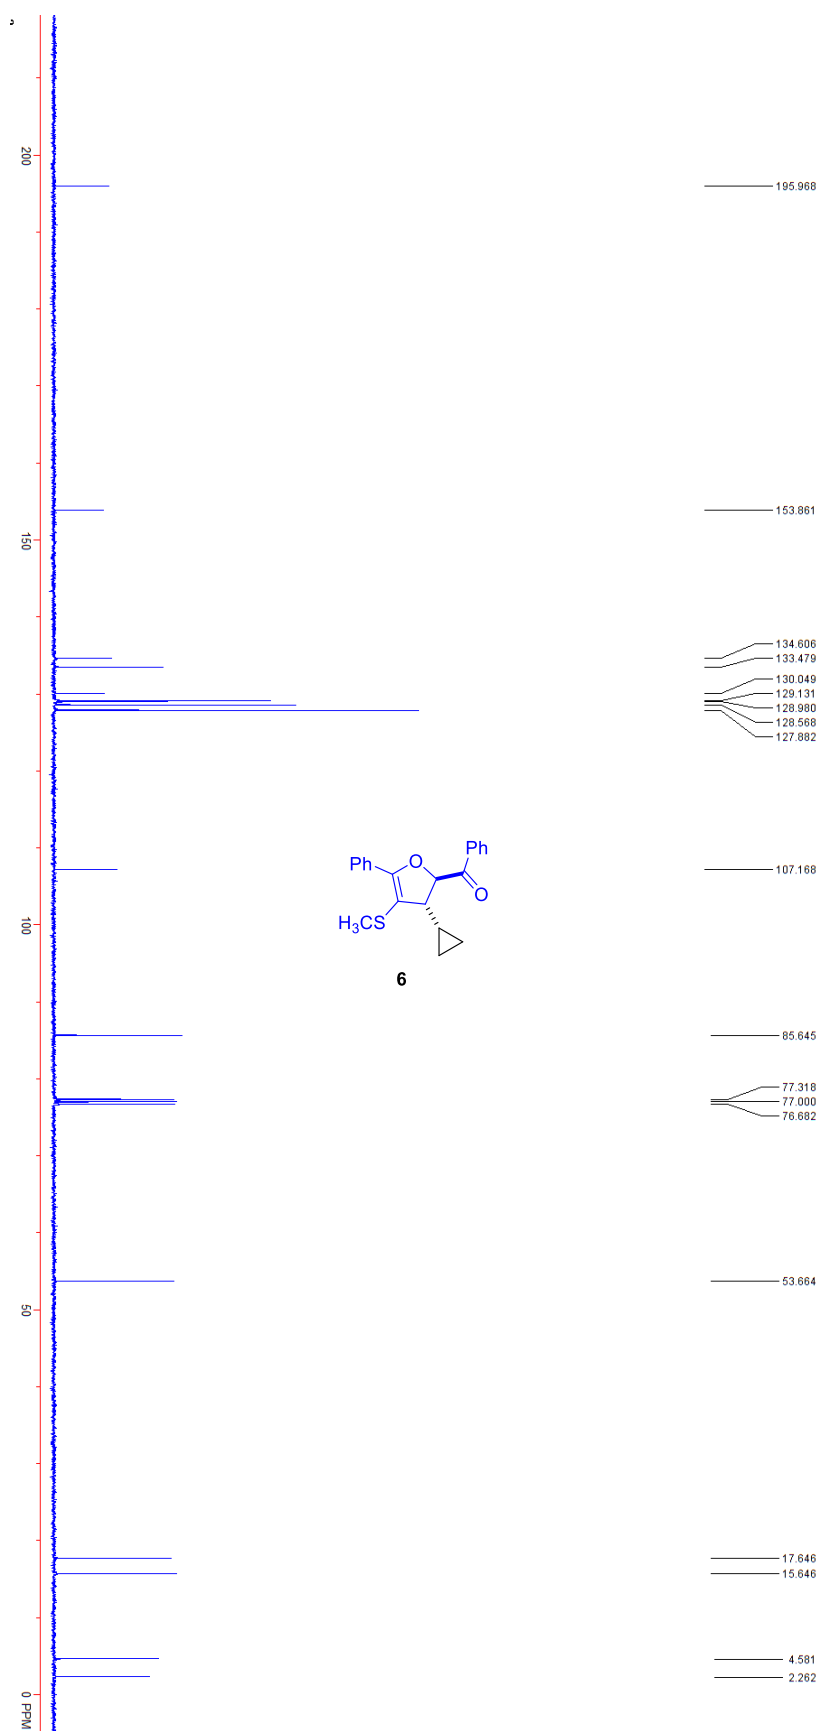

$^1\text{H}$  NMR spectrum of product **7** (400 MHz,  $\text{CDCl}_3$ )

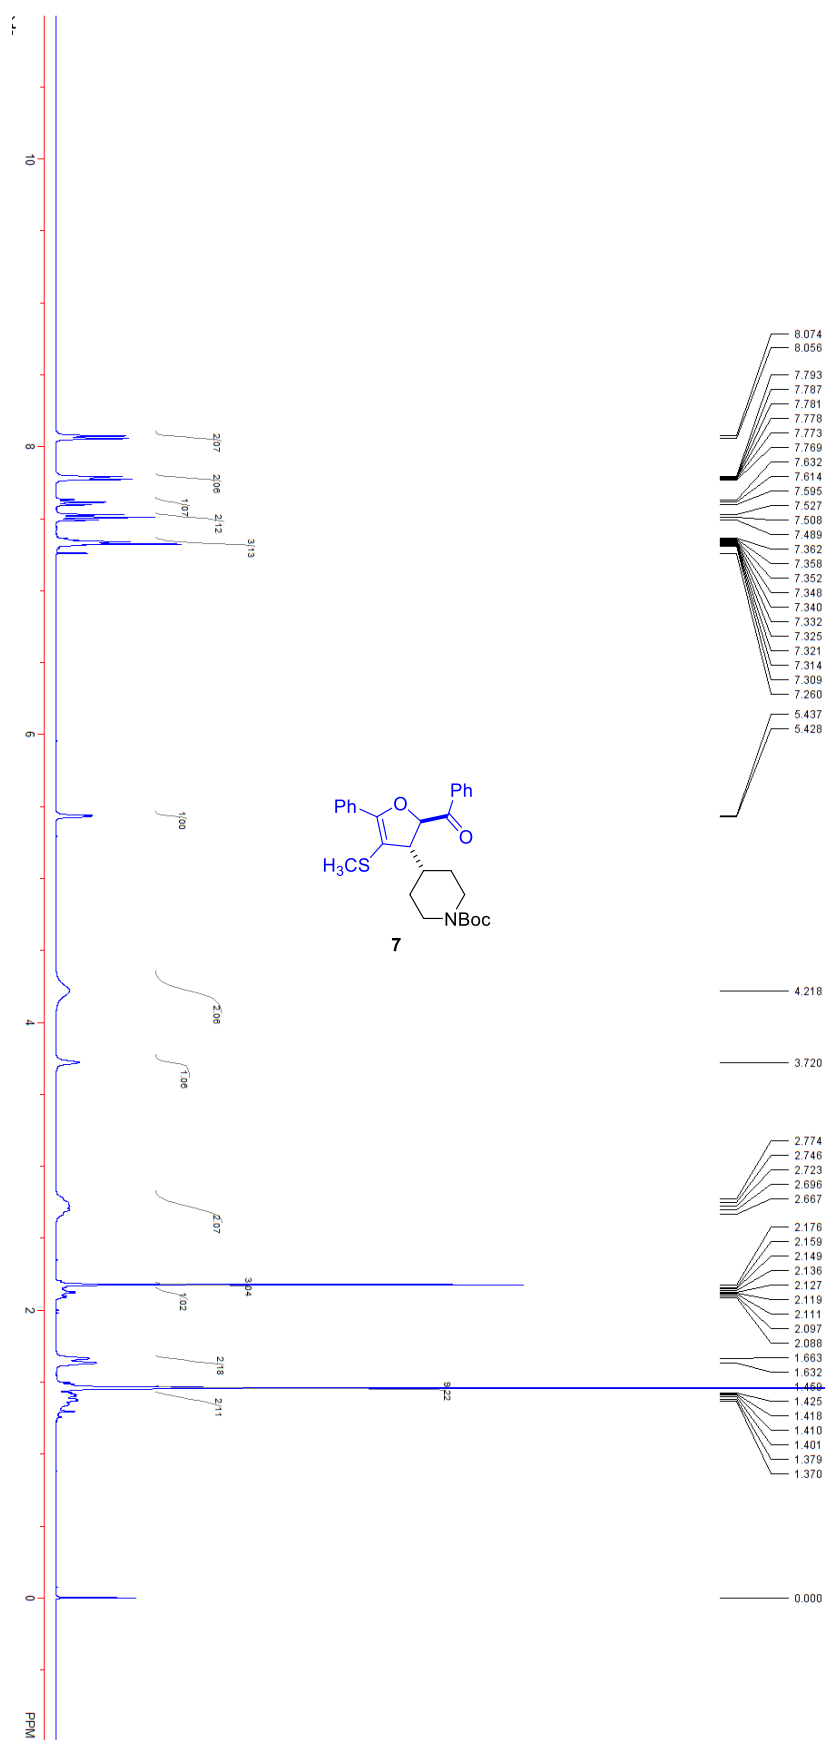

$^{13}\text{C}$  NMR spectrum of product **7** (100 MHz,  $\text{CDCl}_3$ )

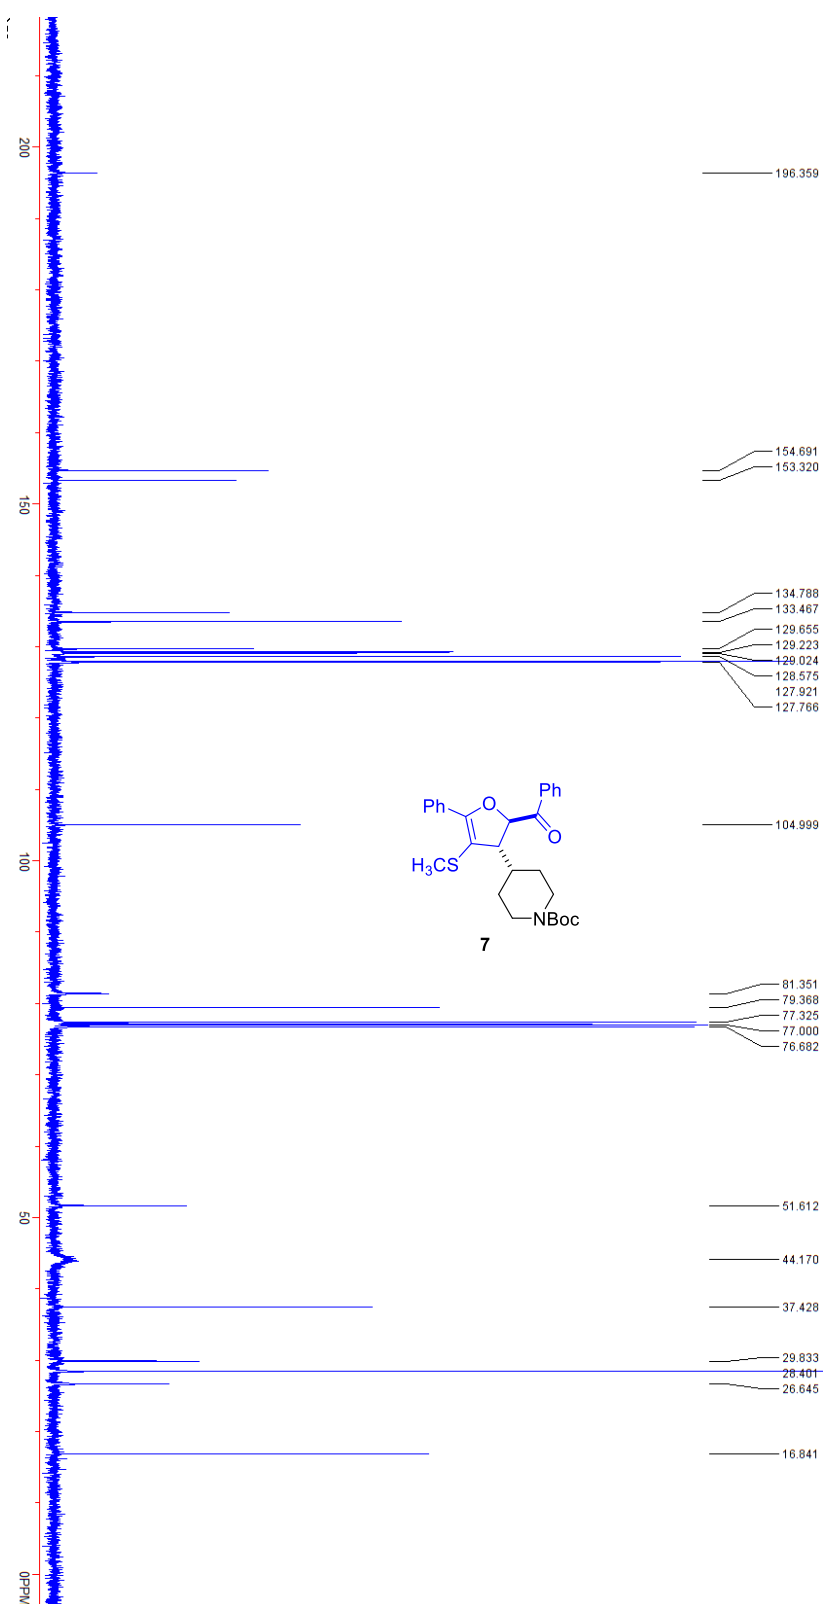

$^1\text{H}$  NMR spectrum of product **8** (400 MHz,  $\text{CDCl}_3$ )

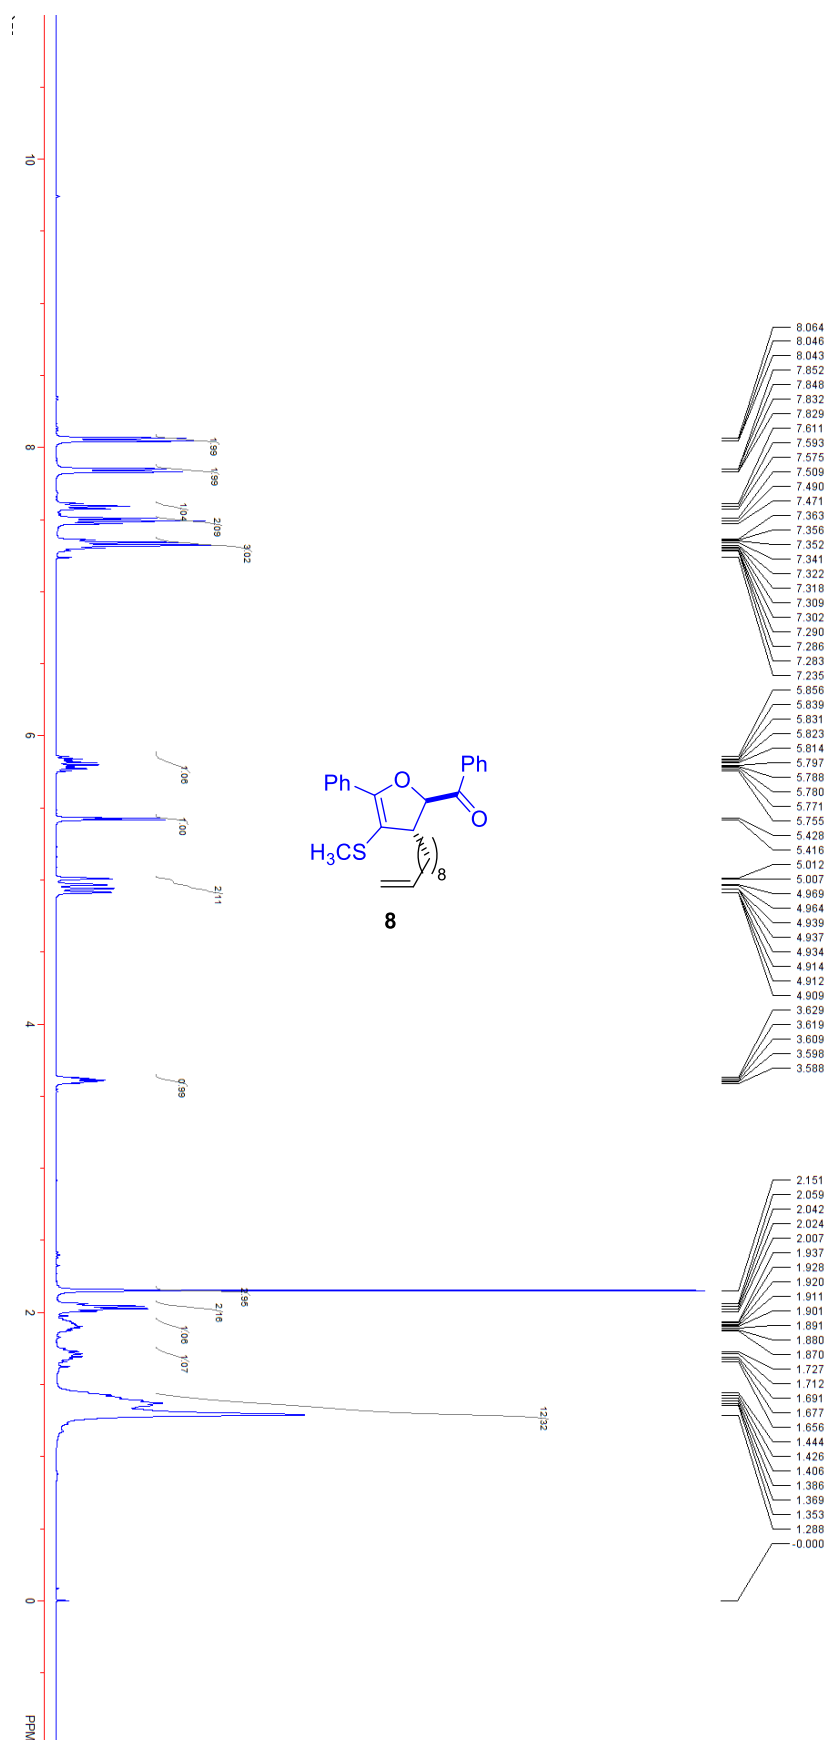

$^{13}\text{C}$  NMR spectrum of product **8** (100 MHz,  $\text{CDCl}_3$ )

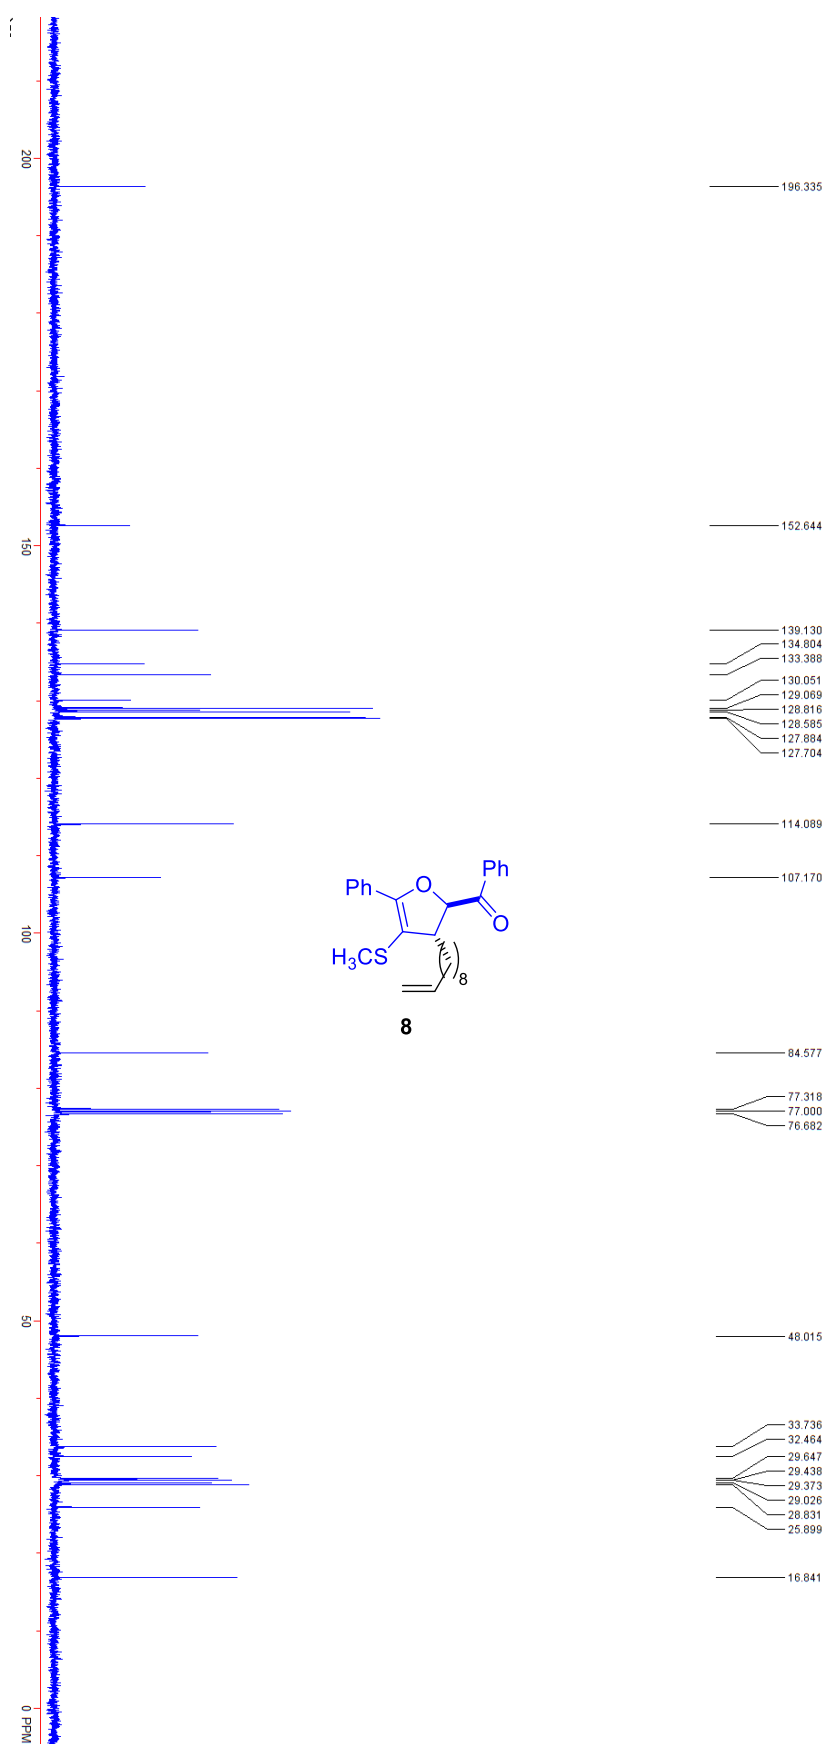

$^1\text{H}$  NMR spectrum of product **9** (400 MHz,  $\text{CDCl}_3$ )

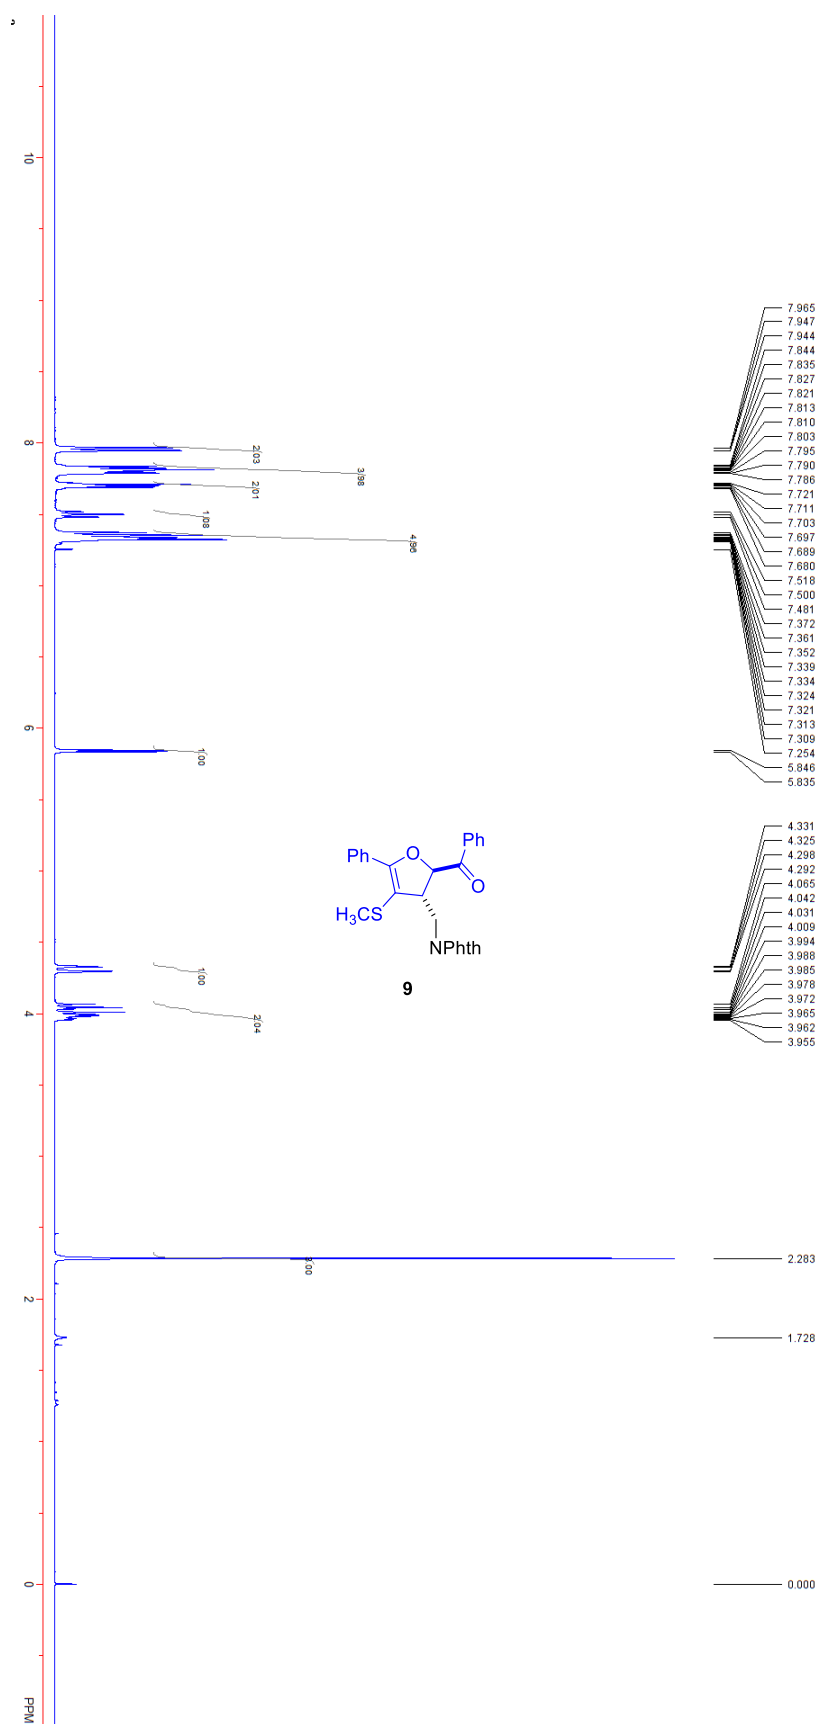

$^{13}\text{C}$  NMR spectrum of product **9** (100 MHz,  $\text{CDCl}_3$ )

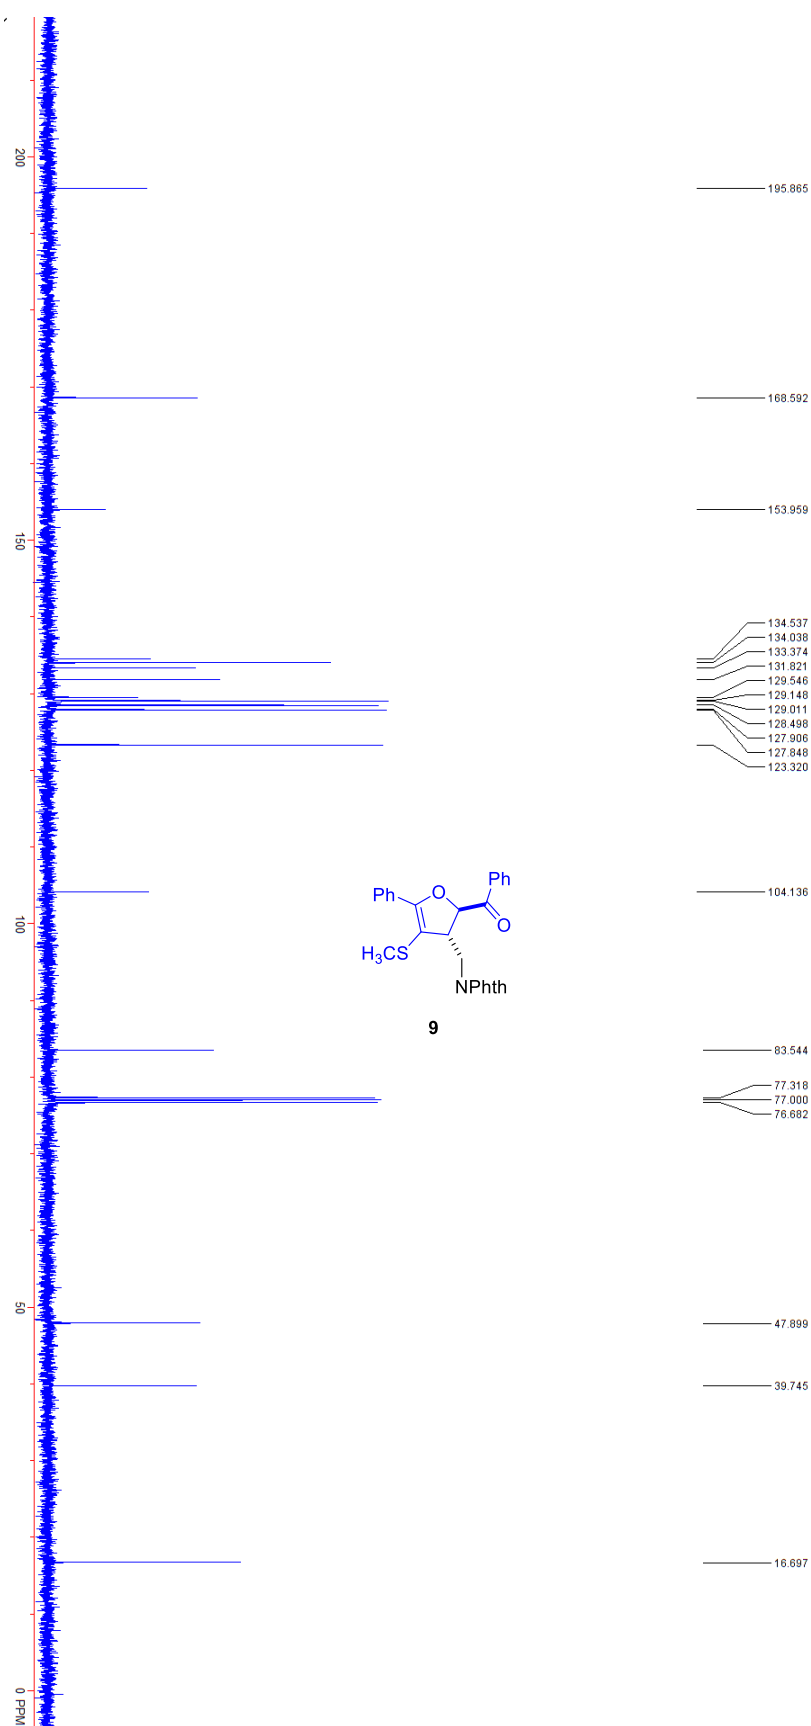

$^1\text{H}$  NMR spectrum of product **10** (400 MHz,  $\text{CDCl}_3$ )

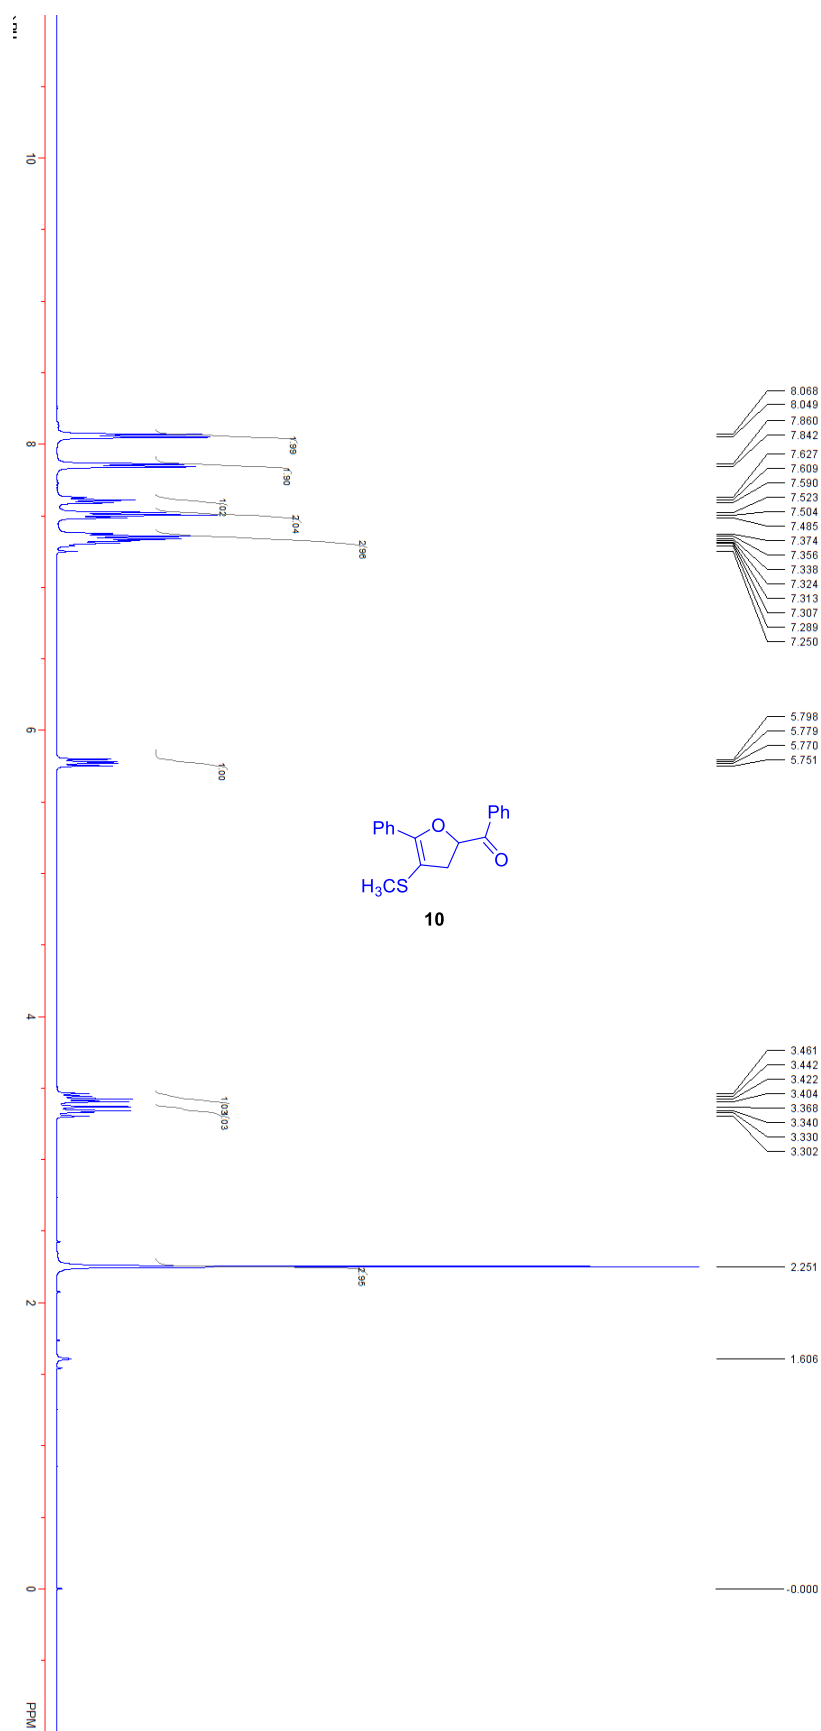



$^{13}\text{C}$  NMR spectrum of product **10** (100 MHz,  $\text{CDCl}_3$ )

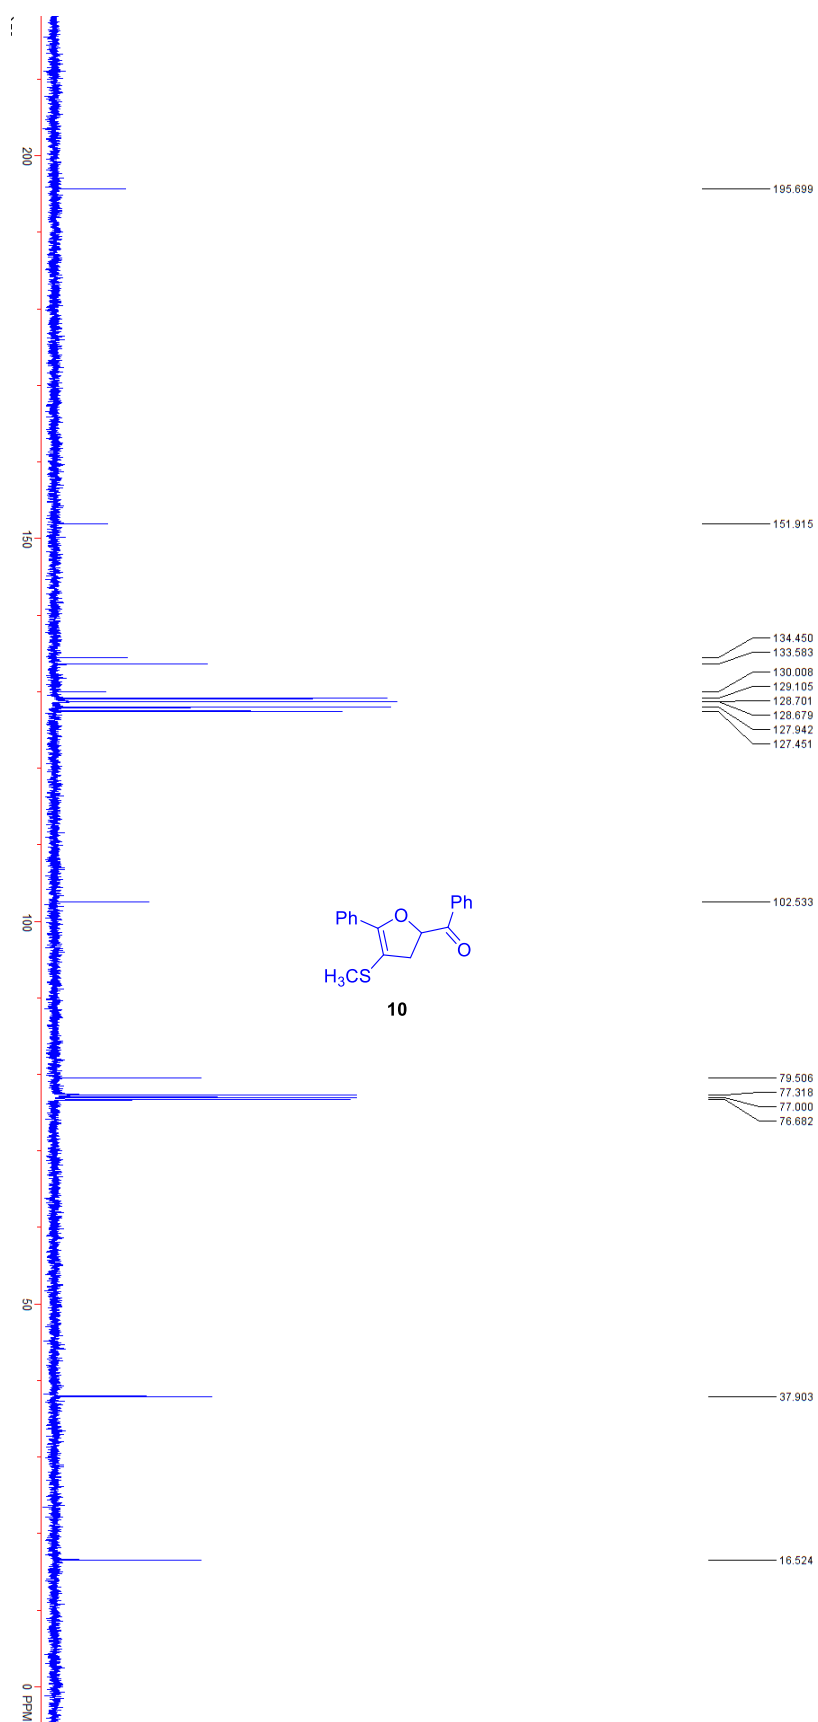

$^1\text{H}$  NMR spectrum of product **11** (400 MHz,  $\text{CDCl}_3$ )

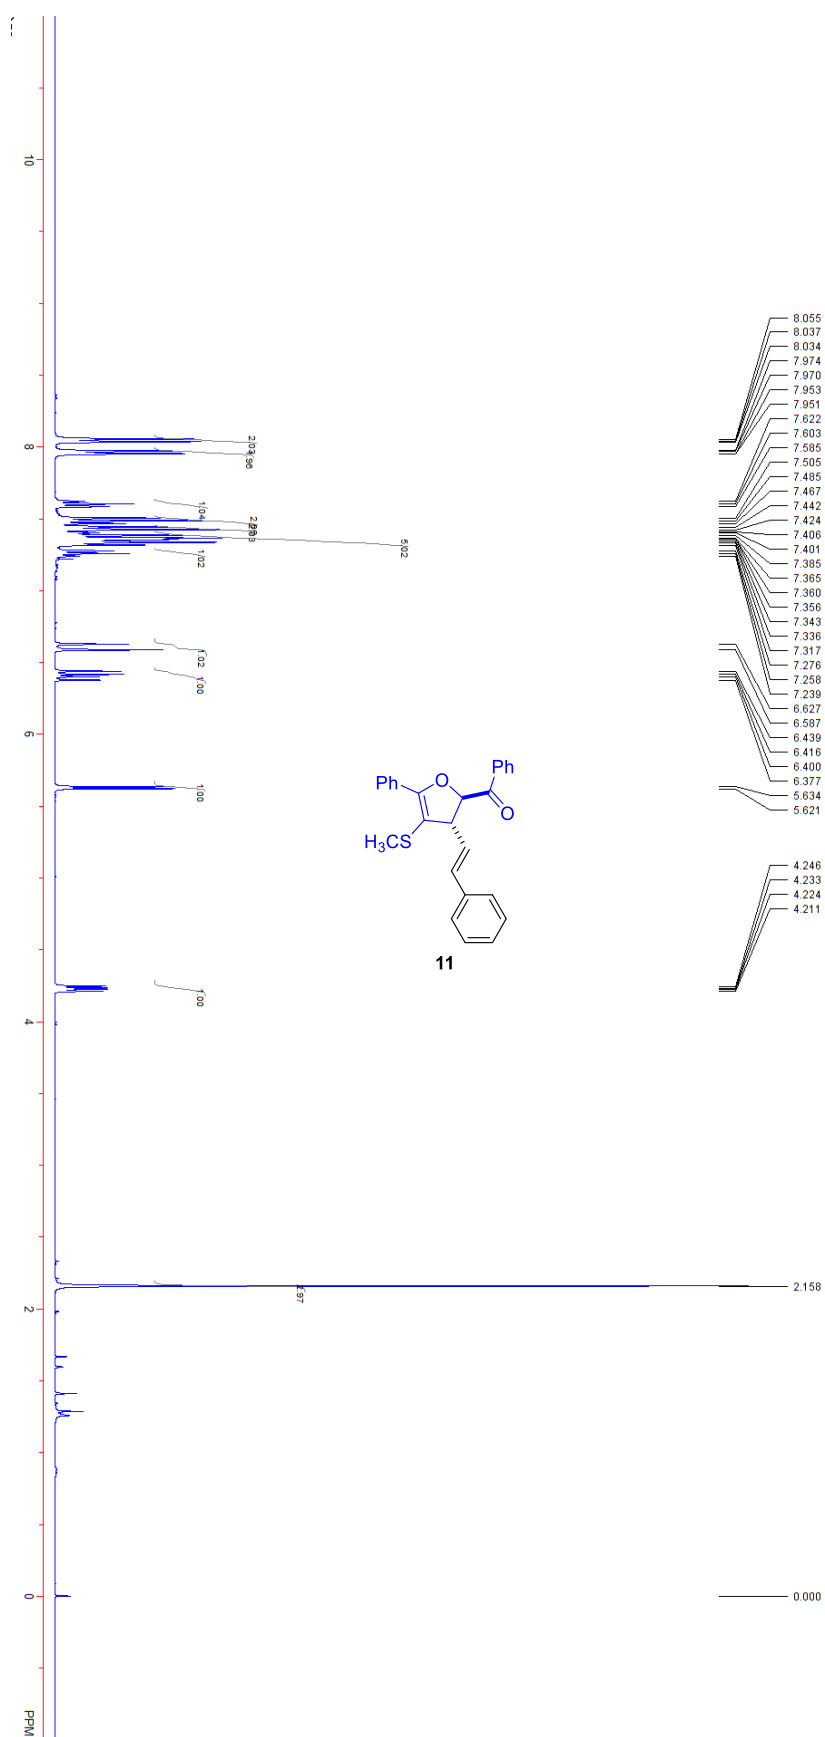

$^{13}\text{C}$  NMR spectrum of product **11** (100 MHz,  $\text{CDCl}_3$ )

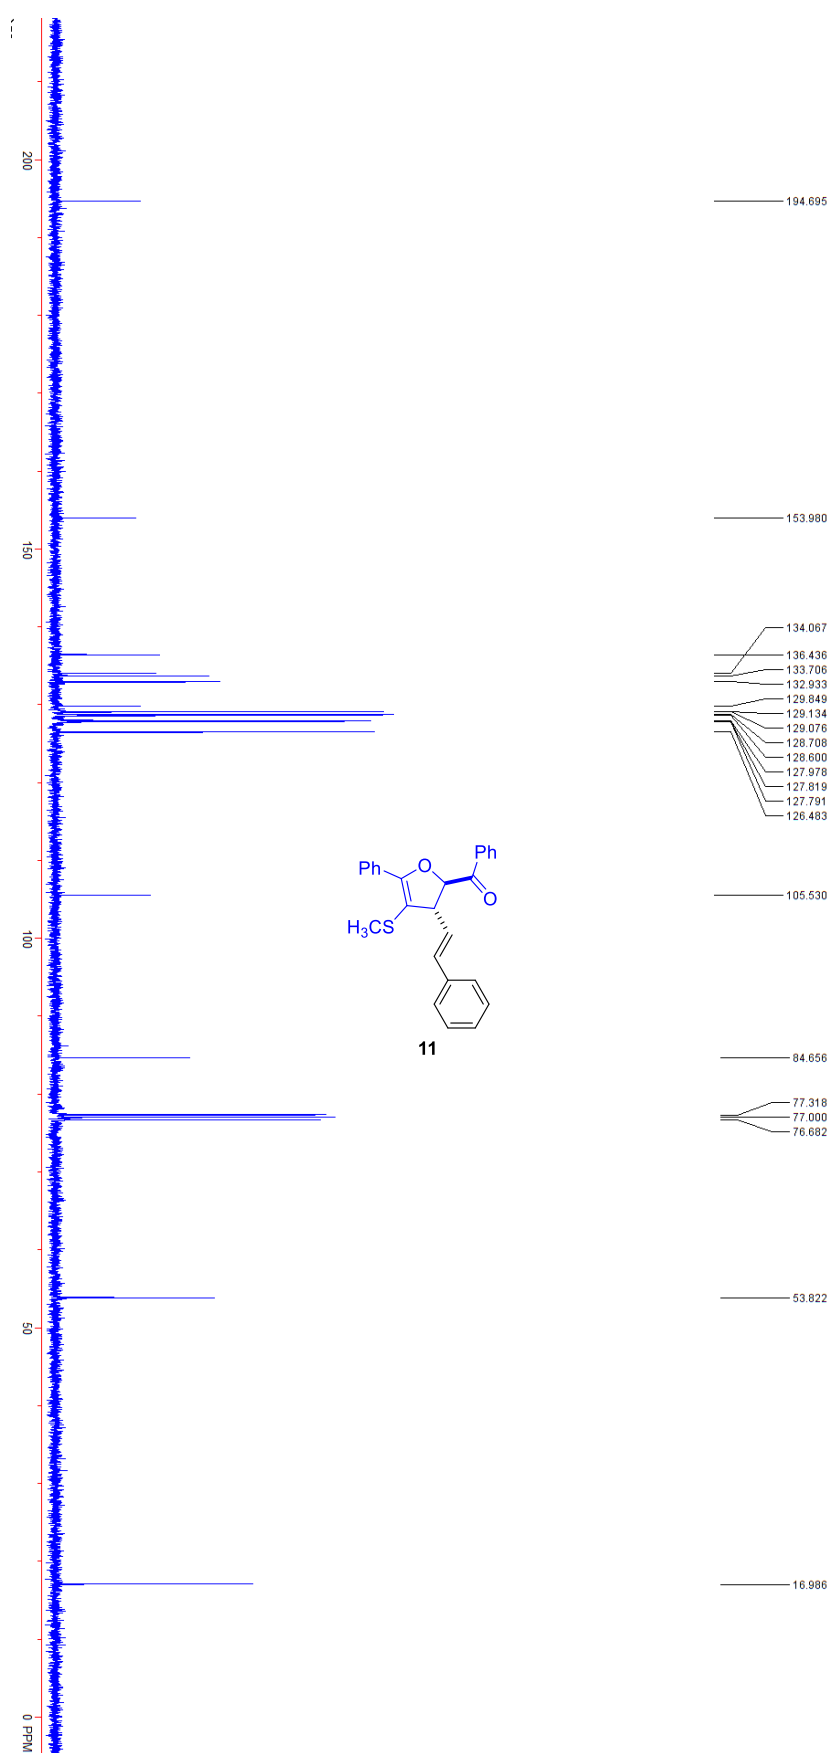

<sup>1</sup>H NMR spectrum of product **12** (400 MHz, CDCl<sub>3</sub>)

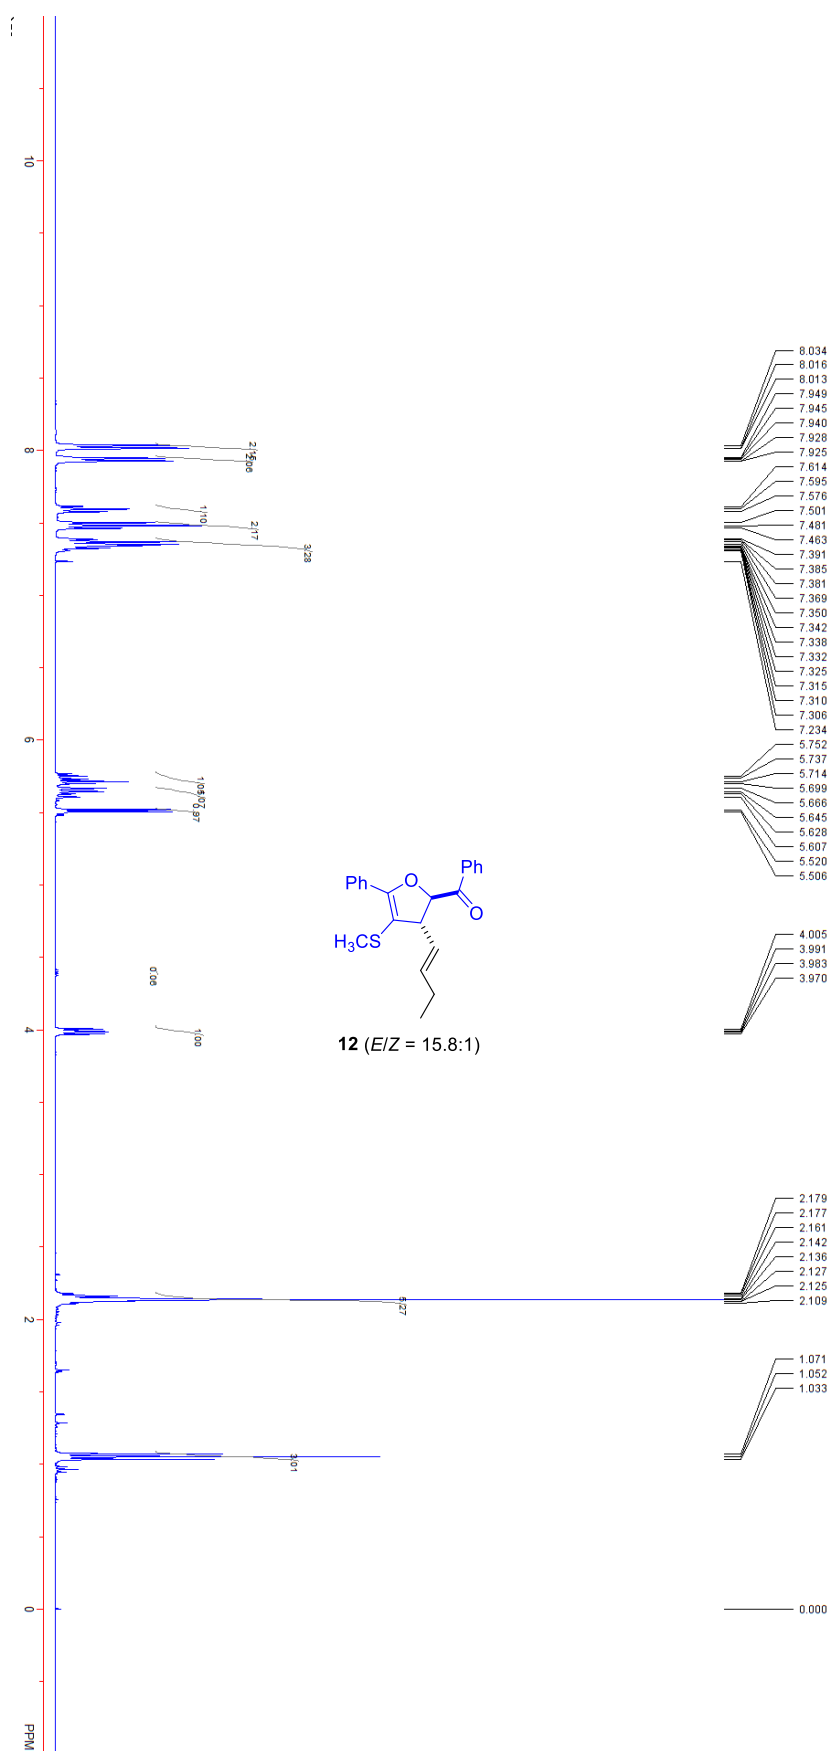

$^{13}\text{C}$  NMR spectrum of product **12** (100 MHz,  $\text{CDCl}_3$ )

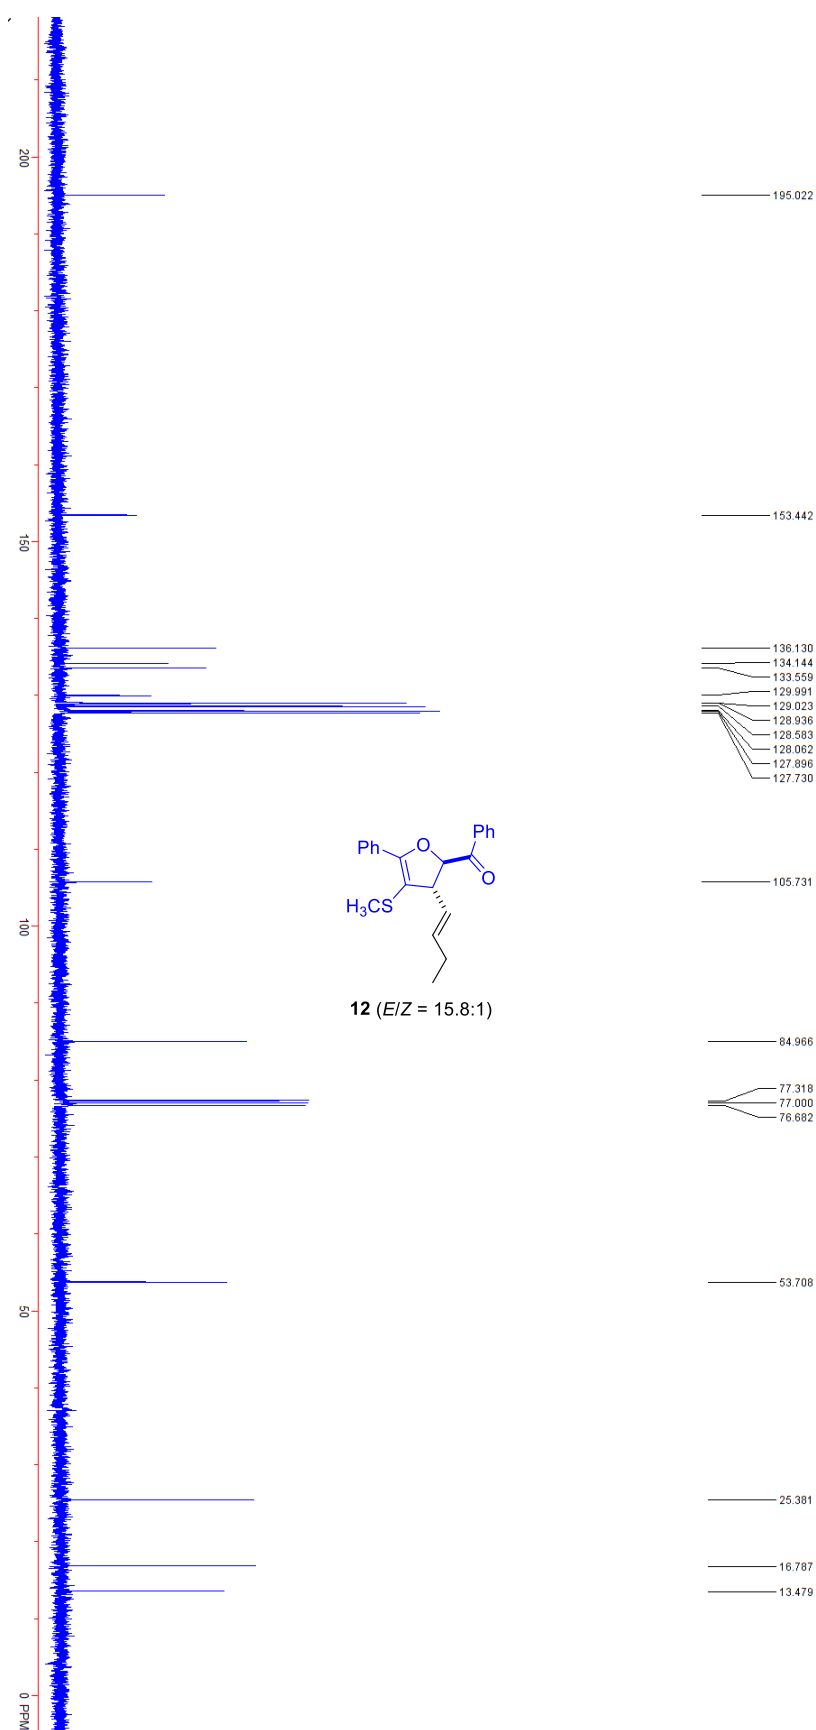

$^1\text{H}$  NMR spectrum of product **13** (400 MHz,  $\text{CDCl}_3$ )

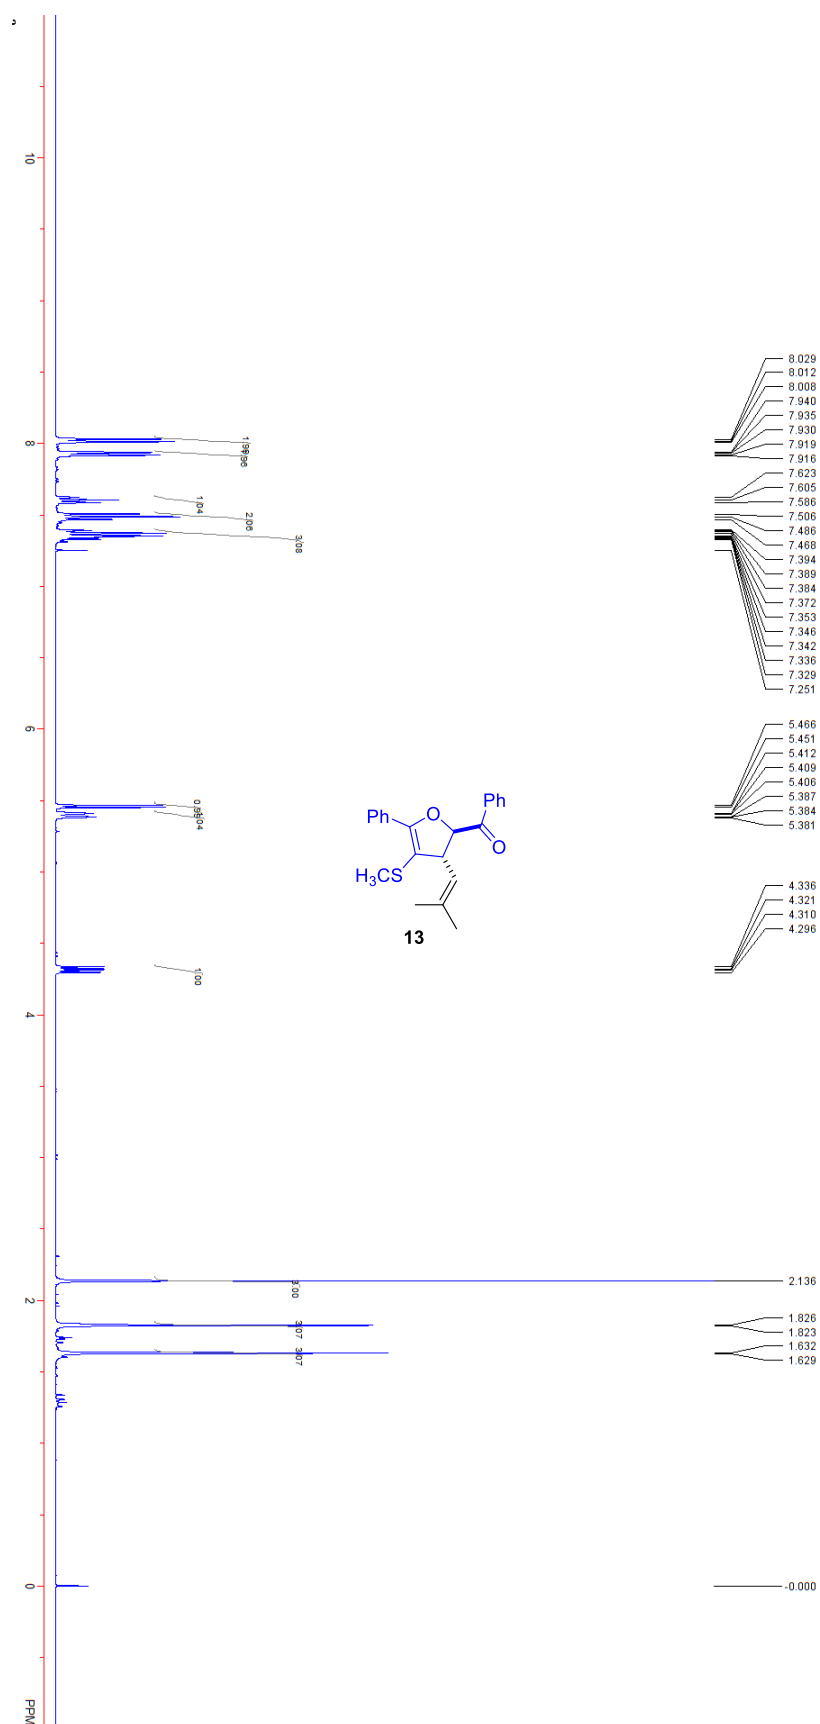

$^{13}\text{C}$  NMR spectrum of product **13** (100 MHz,  $\text{CDCl}_3$ )

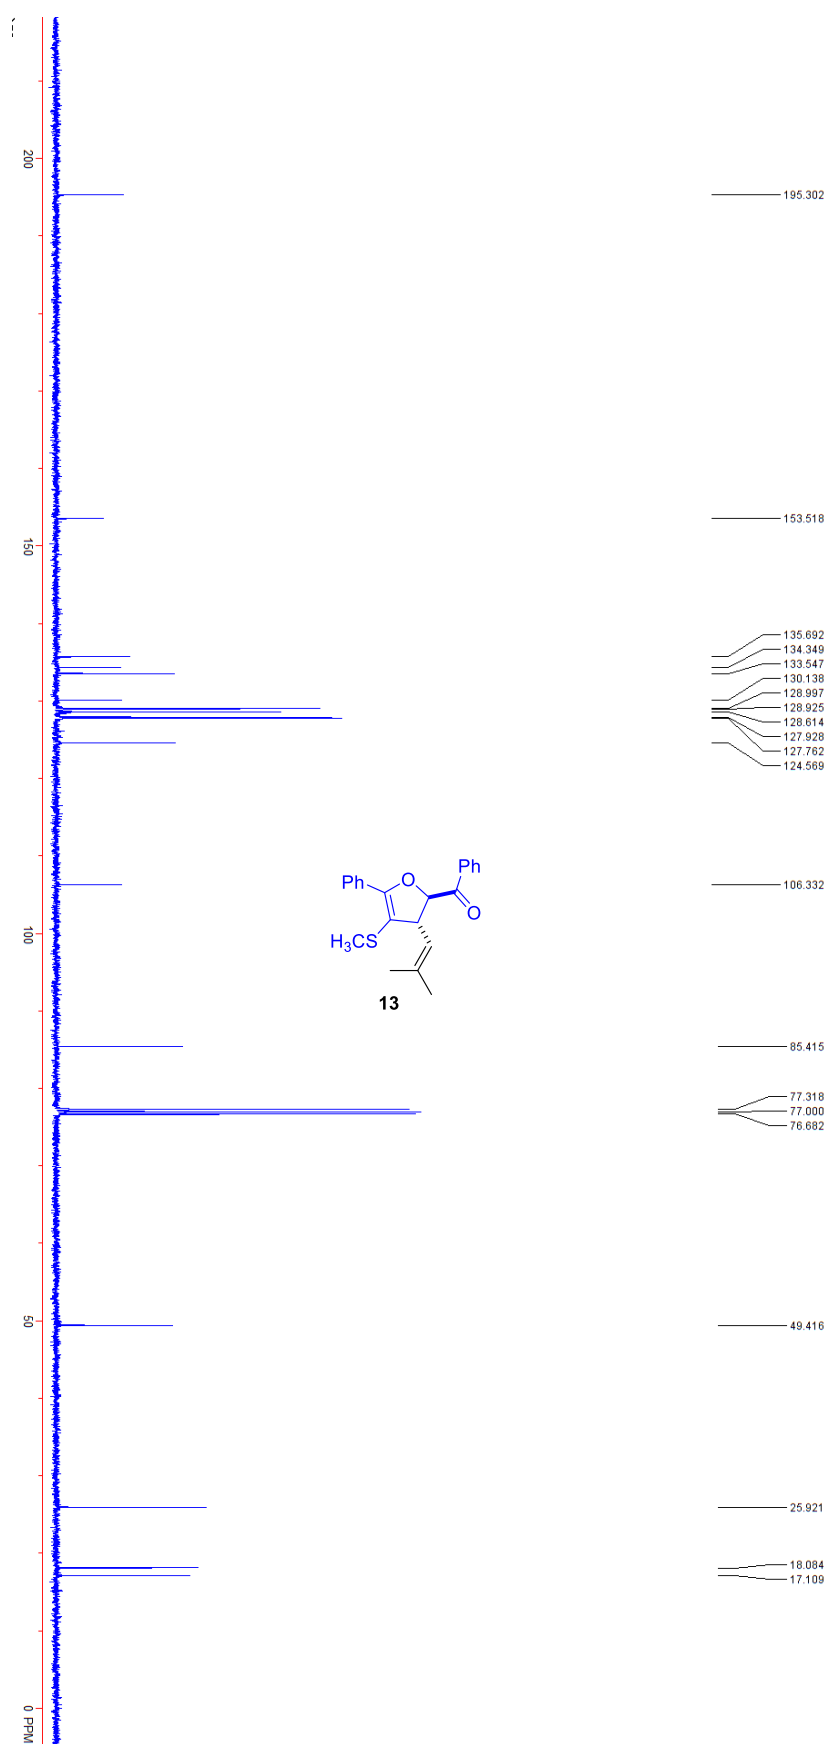

$^1\text{H}$  NMR spectrum of product **14** (400 MHz,  $\text{CDCl}_3$ )

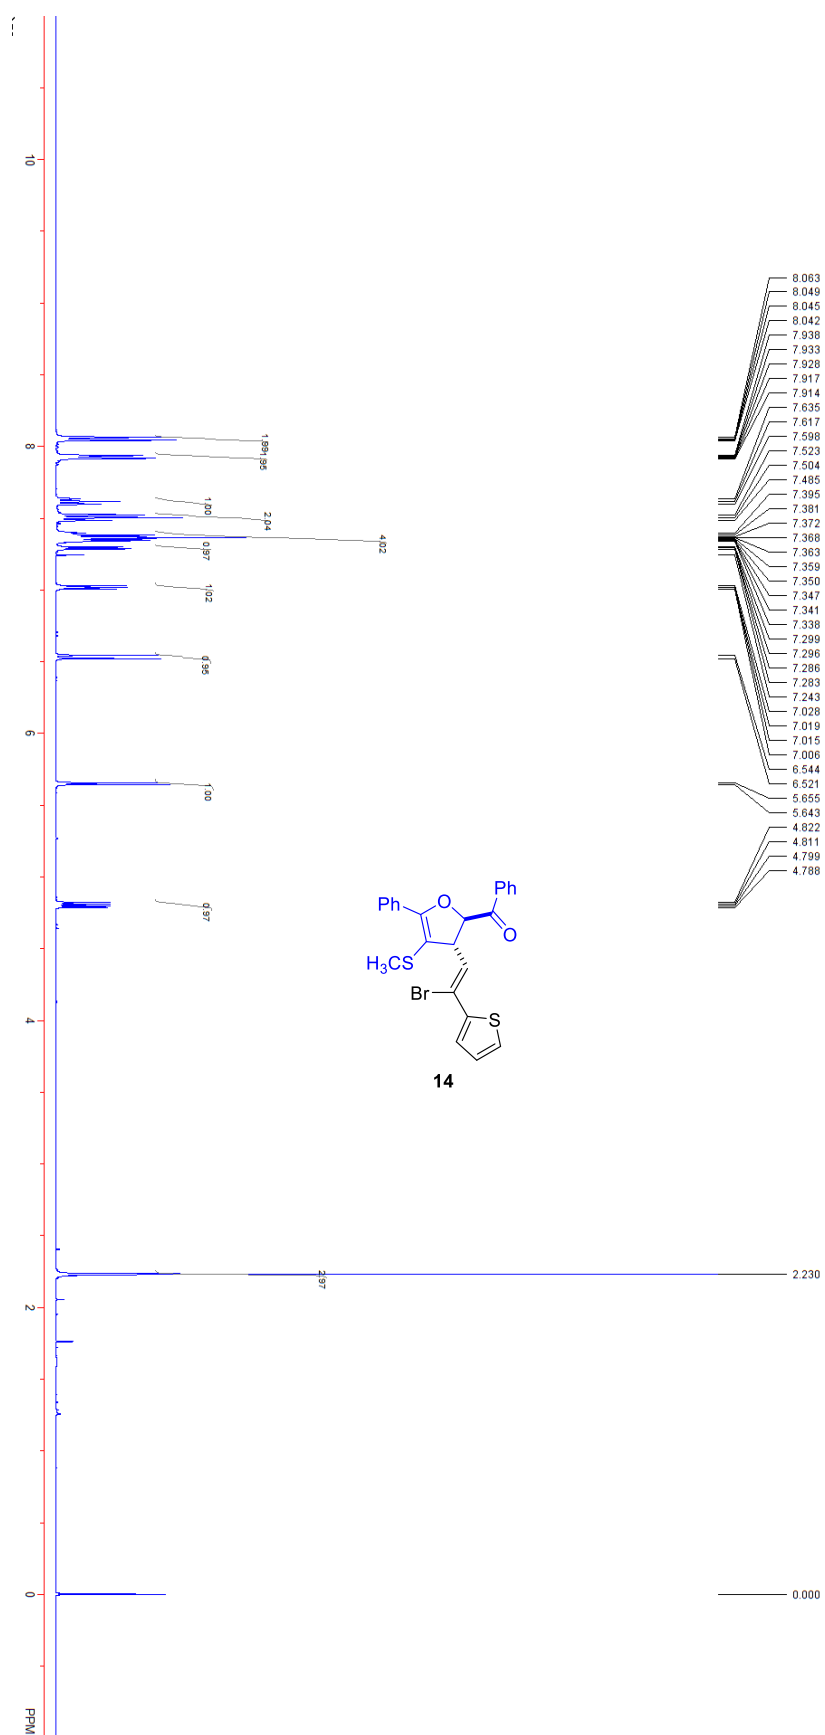



<sup>13</sup>C NMR spectrum of product **14** (100 MHz, CDCl<sub>3</sub>)

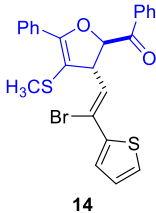

<sup>1</sup>H NMR spectrum of product **15** (400 MHz, CDCl<sub>3</sub>)

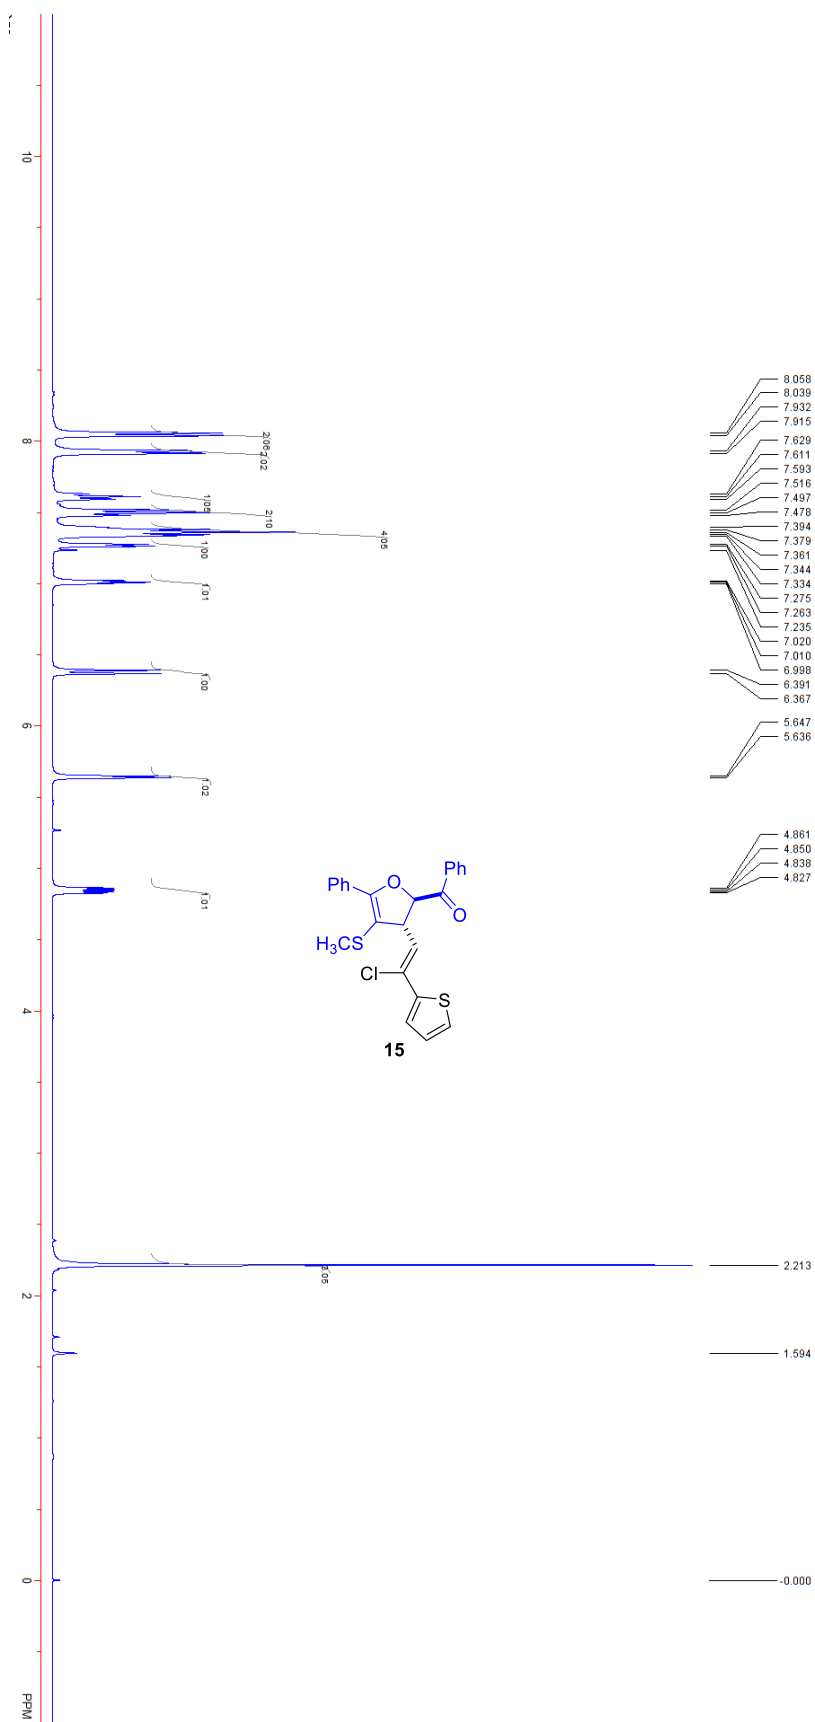

$^{13}\text{C}$  NMR spectrum of product **15** (100 MHz,  $\text{CDCl}_3$ )

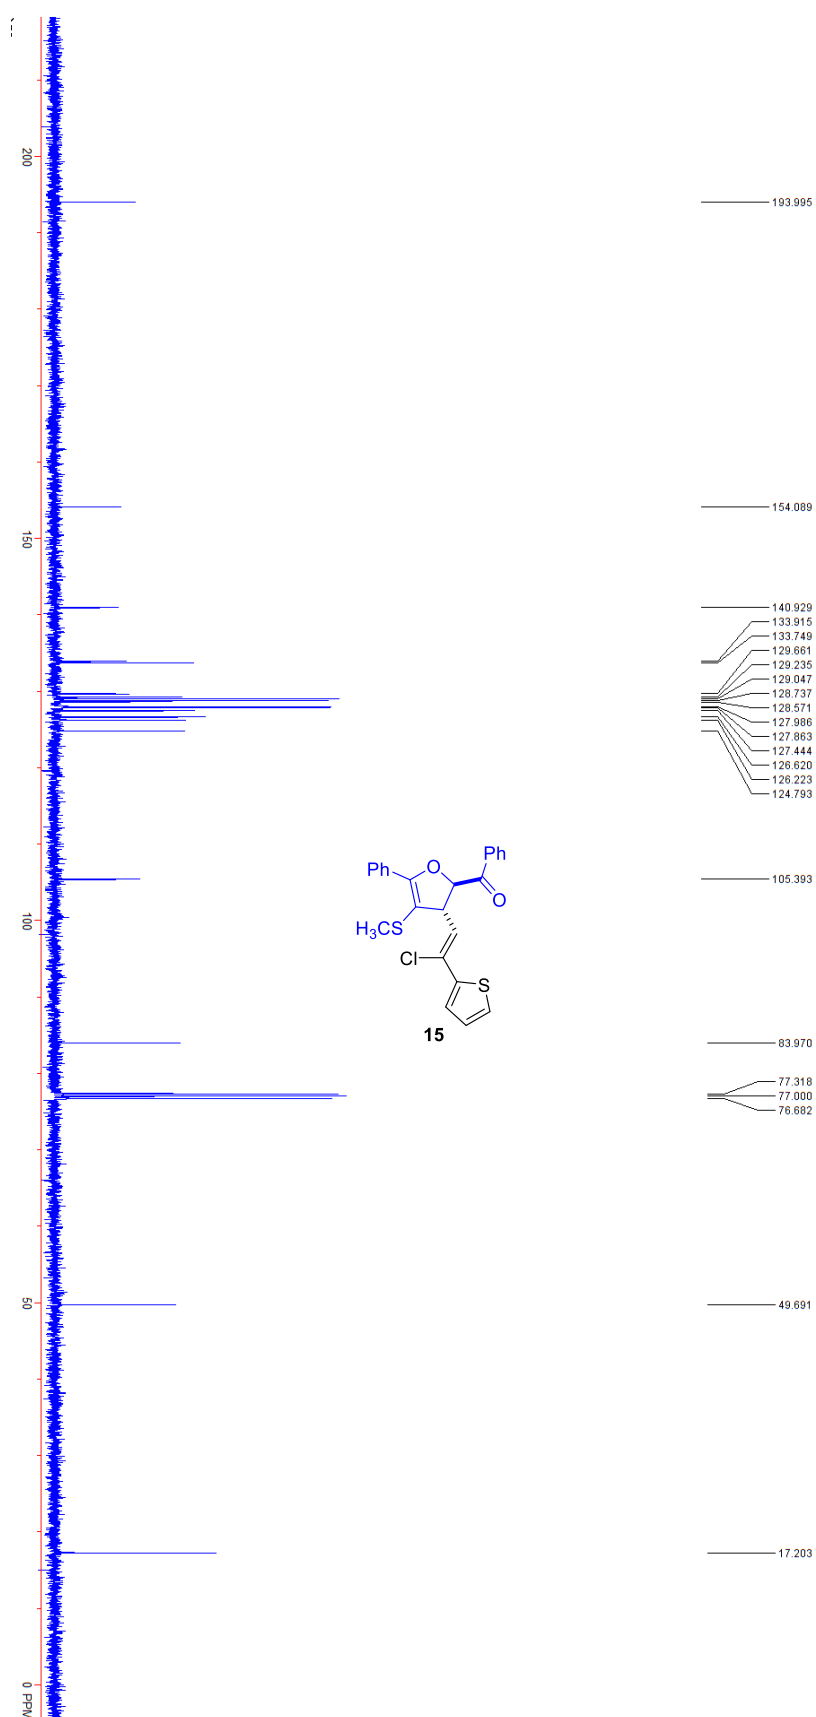

$^1\text{H}$  NMR spectrum of product **16** (400 MHz,  $\text{CDCl}_3$ )

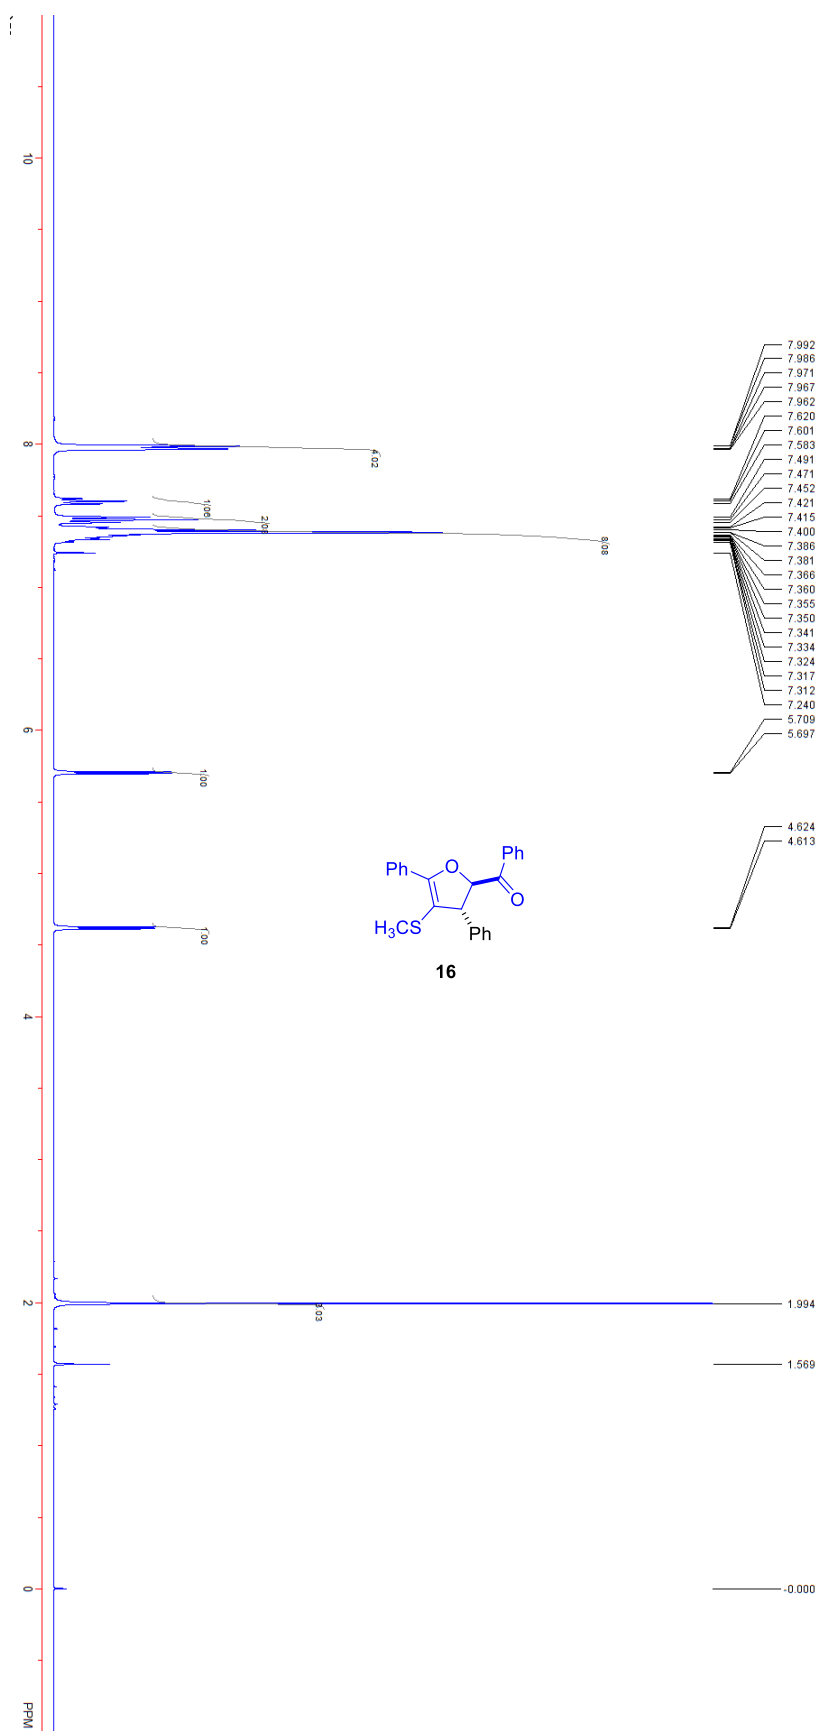

$^{13}\text{C}$  NMR spectrum of product **16** (100 MHz,  $\text{CDCl}_3$ )

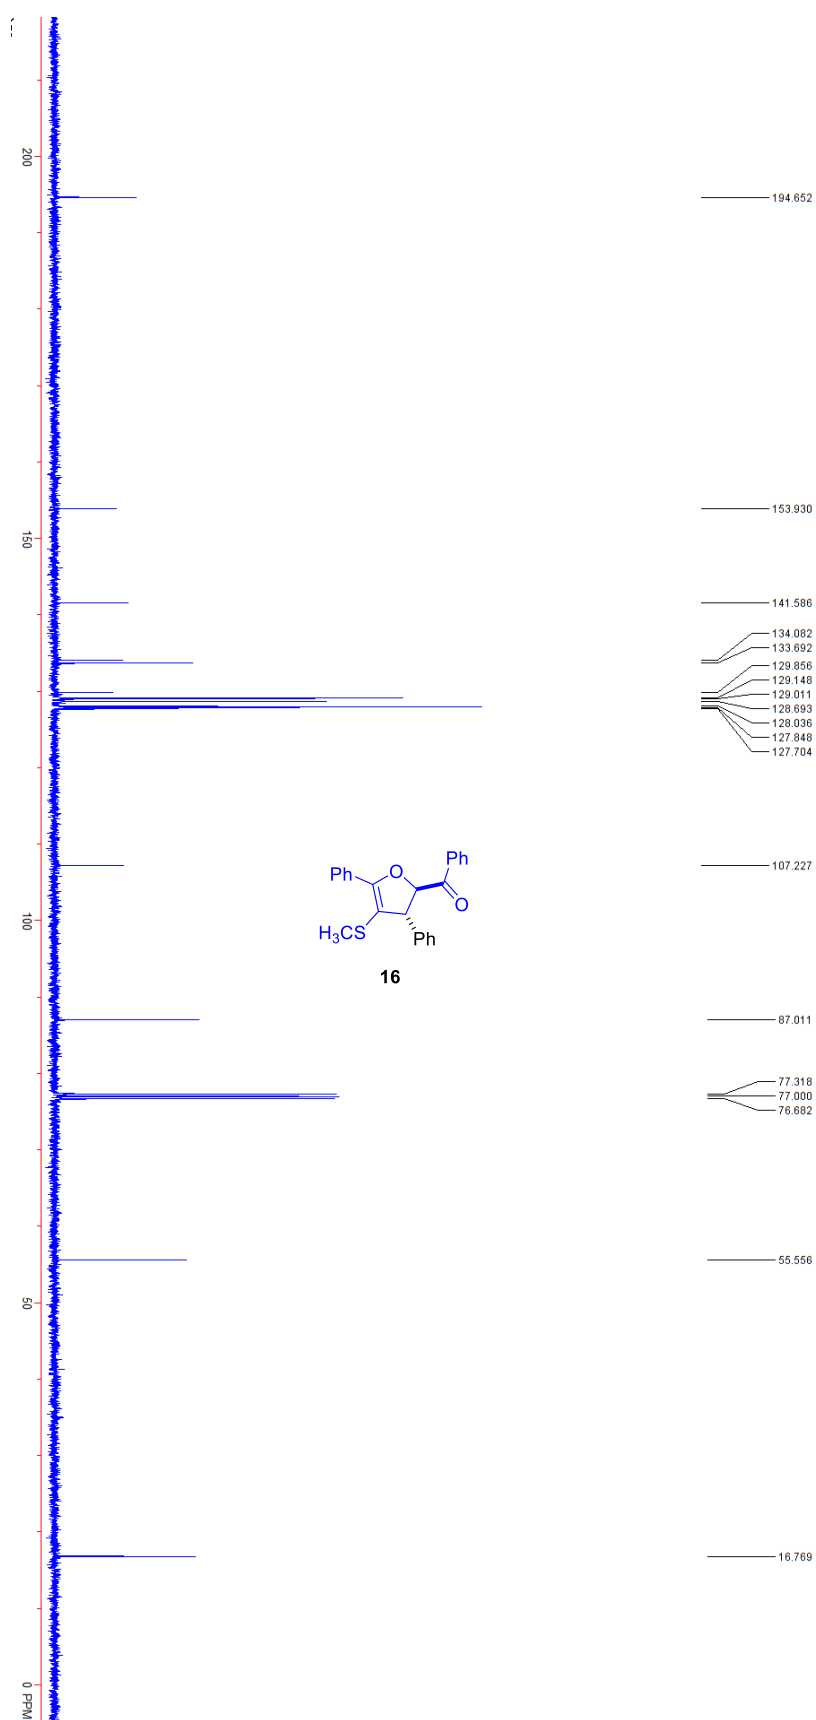

$^1\text{H}$  NMR spectrum of product **17** (400 MHz,  $\text{CDCl}_3$ )

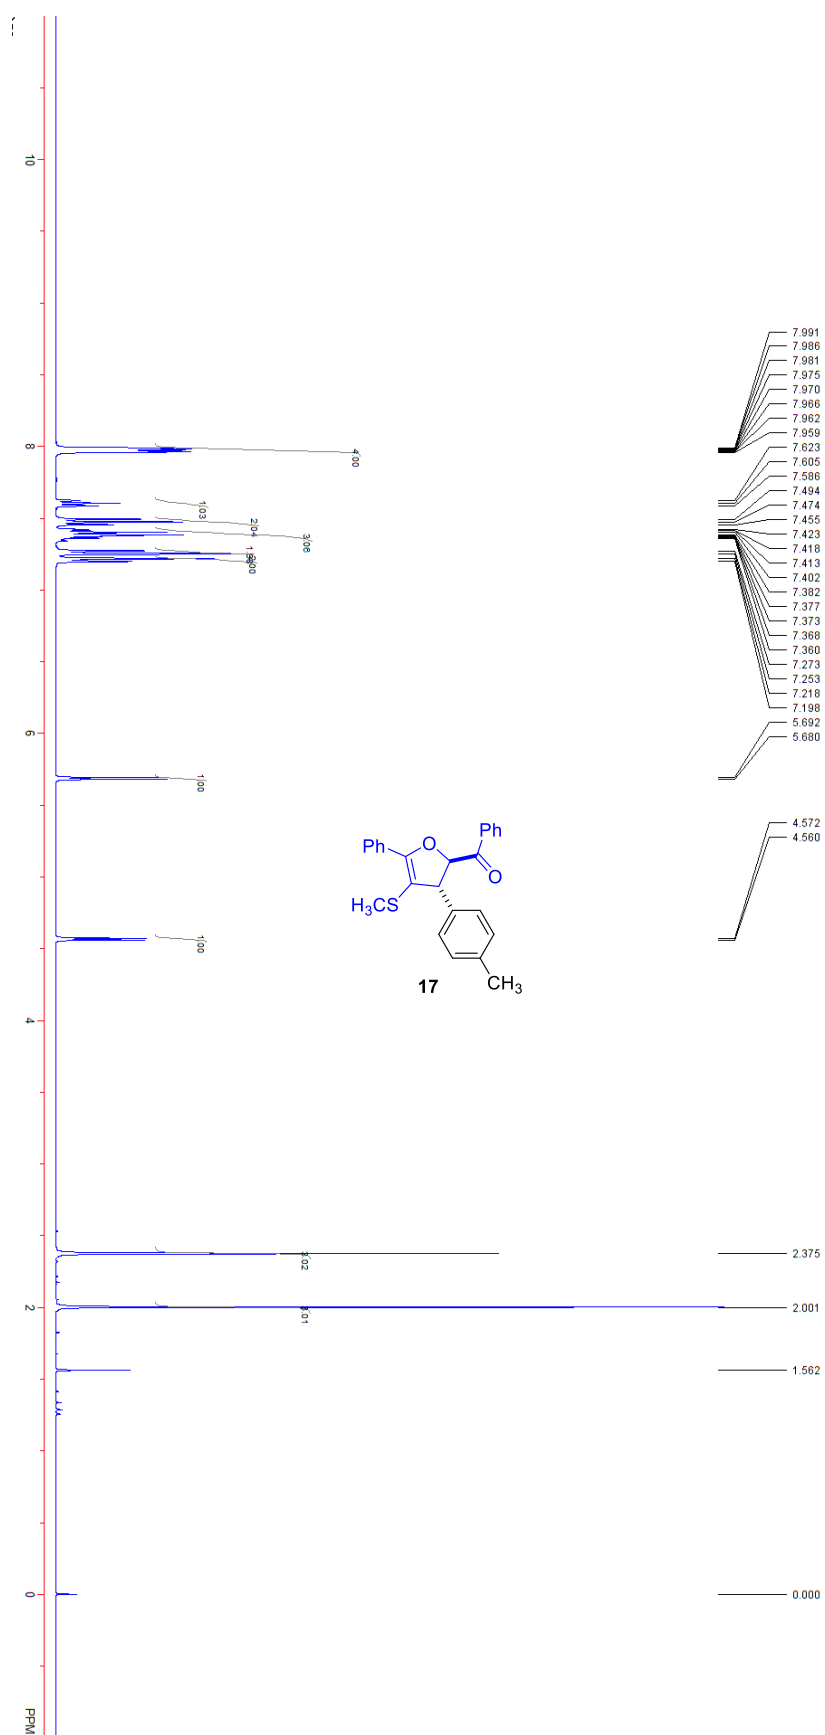

$^{13}\text{C}$  NMR spectrum of product **17** (100 MHz,  $\text{CDCl}_3$ )

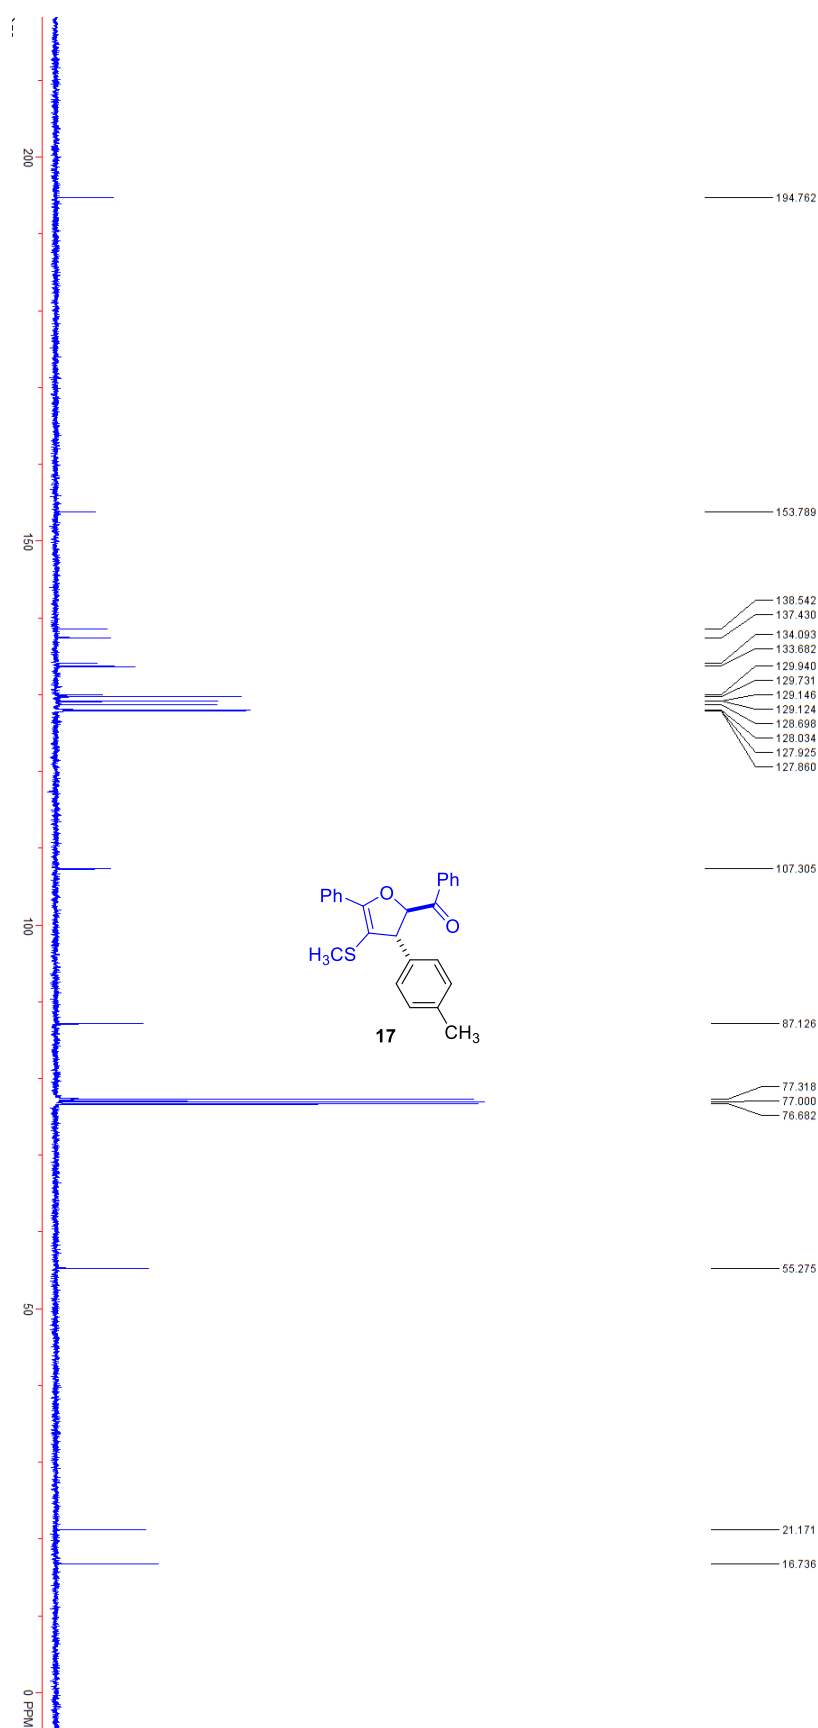

$^1\text{H}$  NMR spectrum of product **18** (400 MHz,  $\text{CDCl}_3$ )

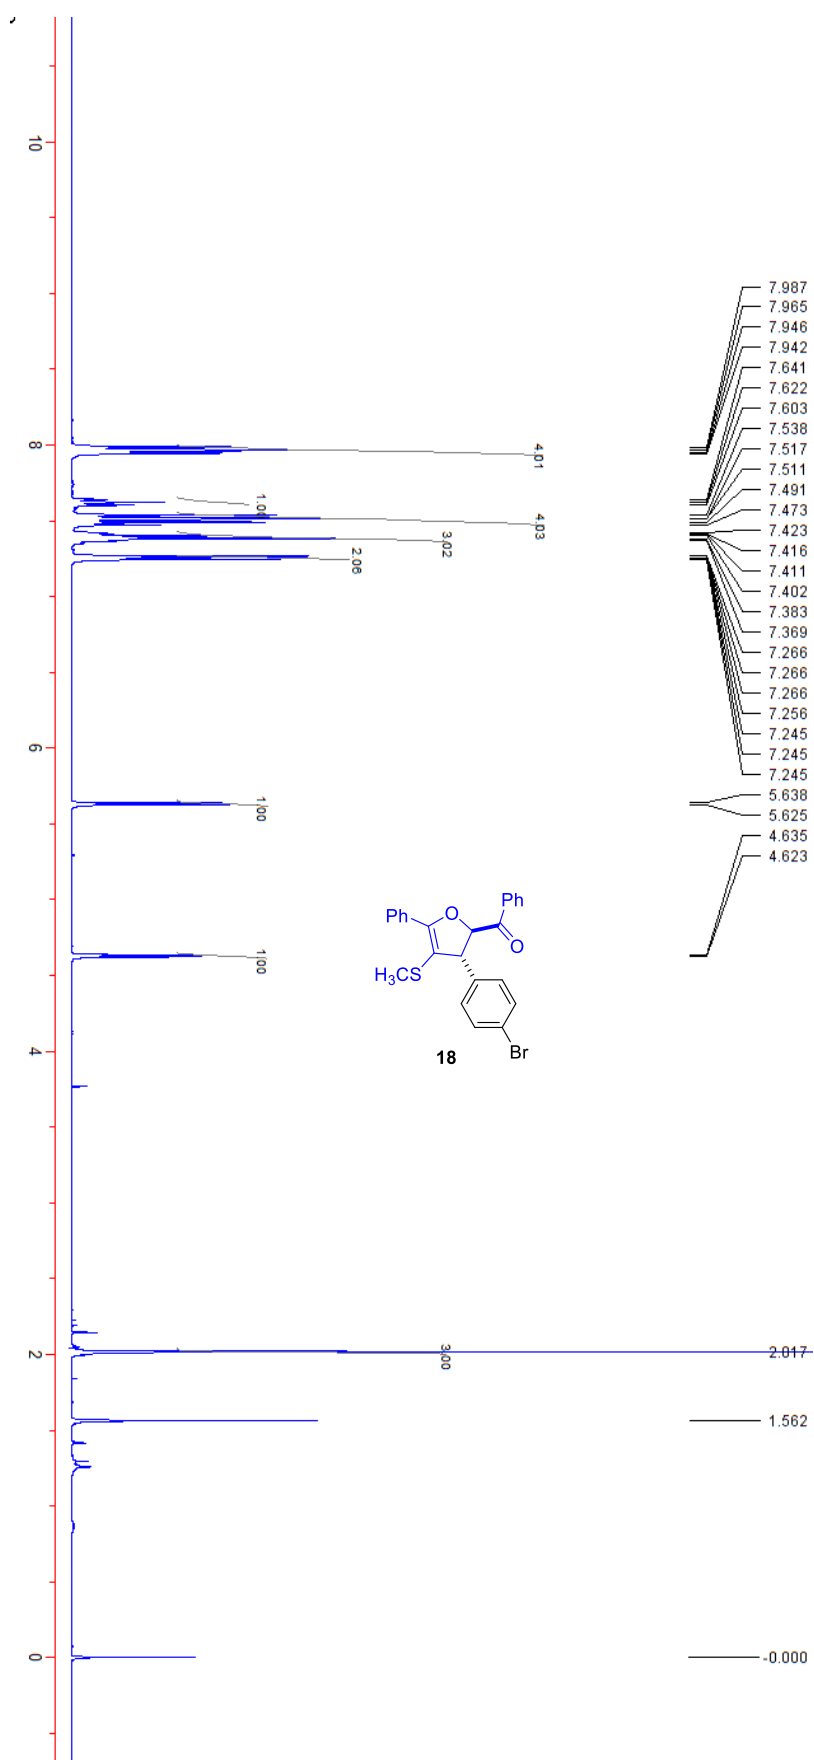



$^{13}\text{C}$  NMR spectrum of product **18** (100 MHz,  $\text{CDCl}_3$ )

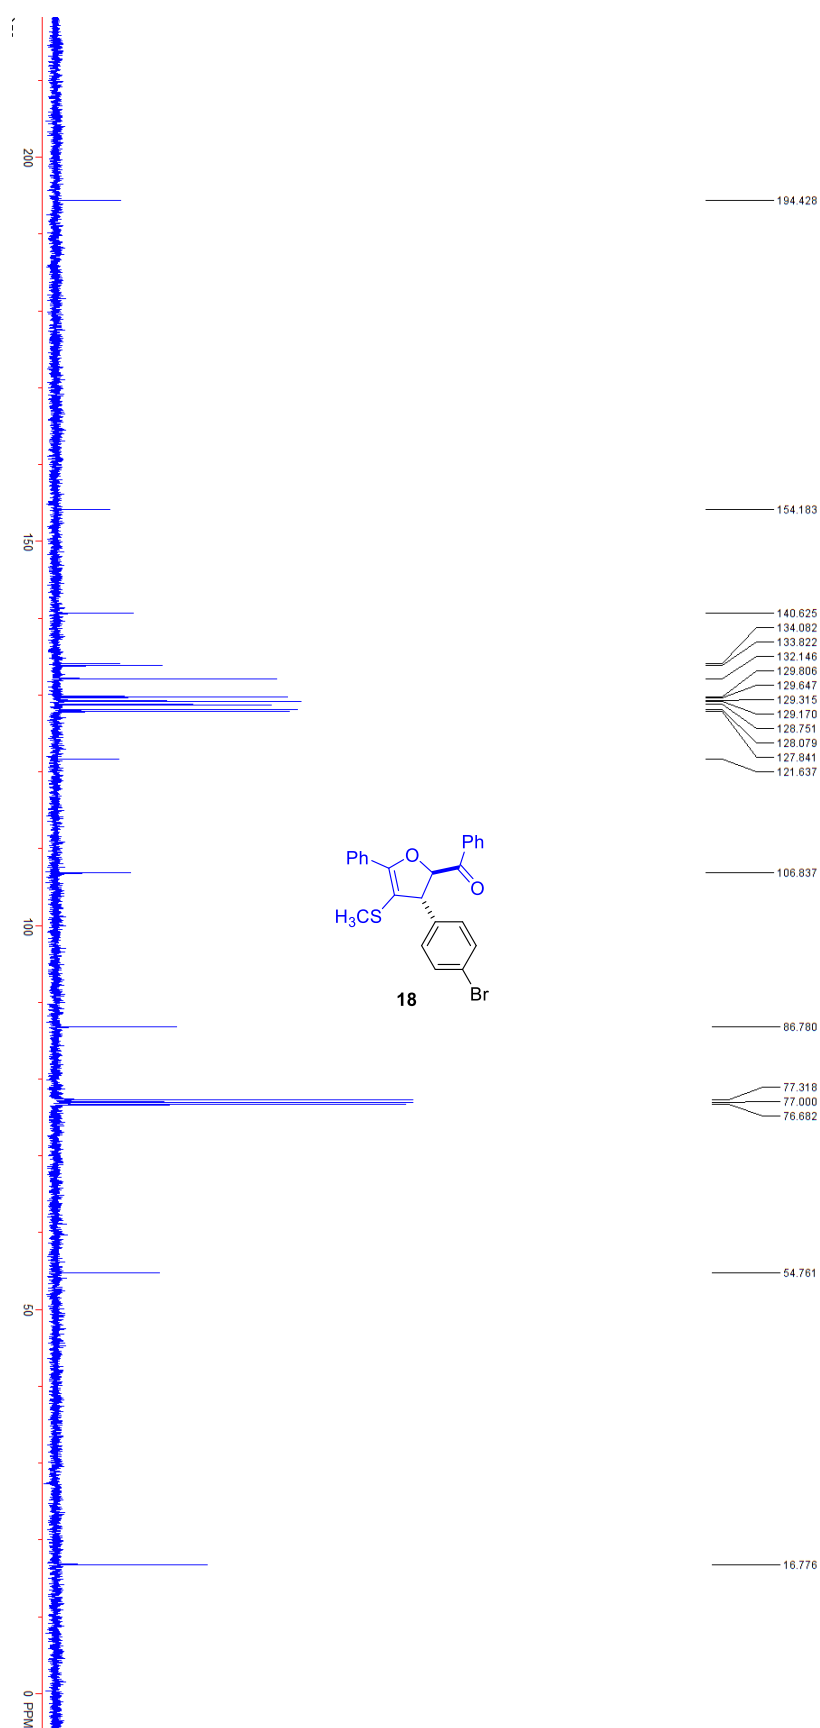

$^1\text{H}$  NMR spectrum of product **19** (400 MHz,  $\text{CDCl}_3$ )

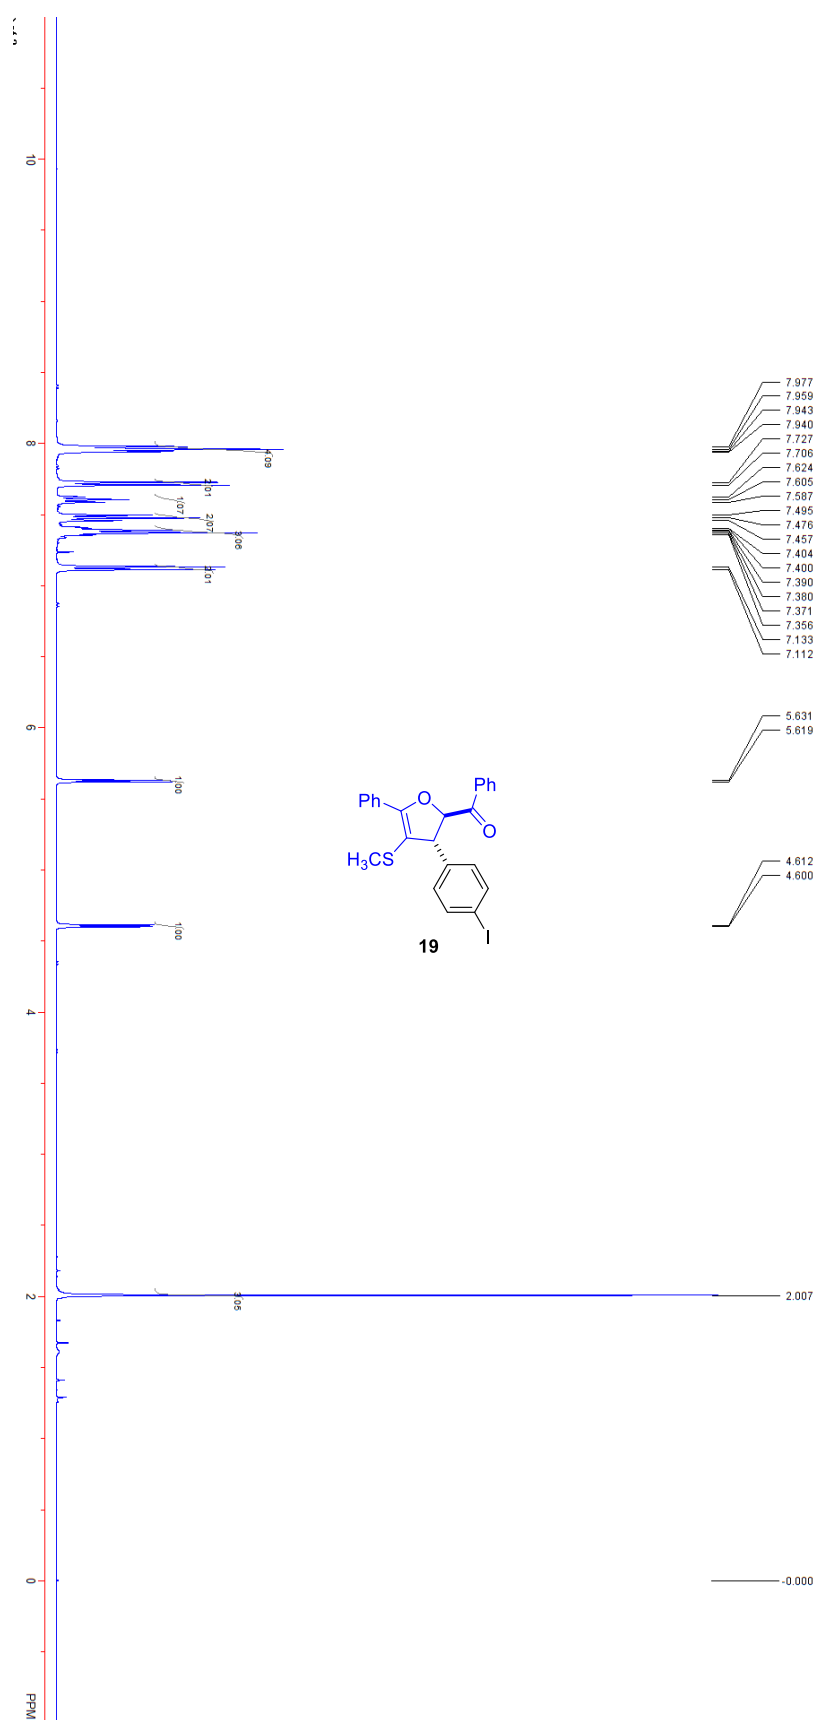

$^{13}\text{C}$  NMR spectrum of product **19** (100 MHz,  $\text{CDCl}_3$ )

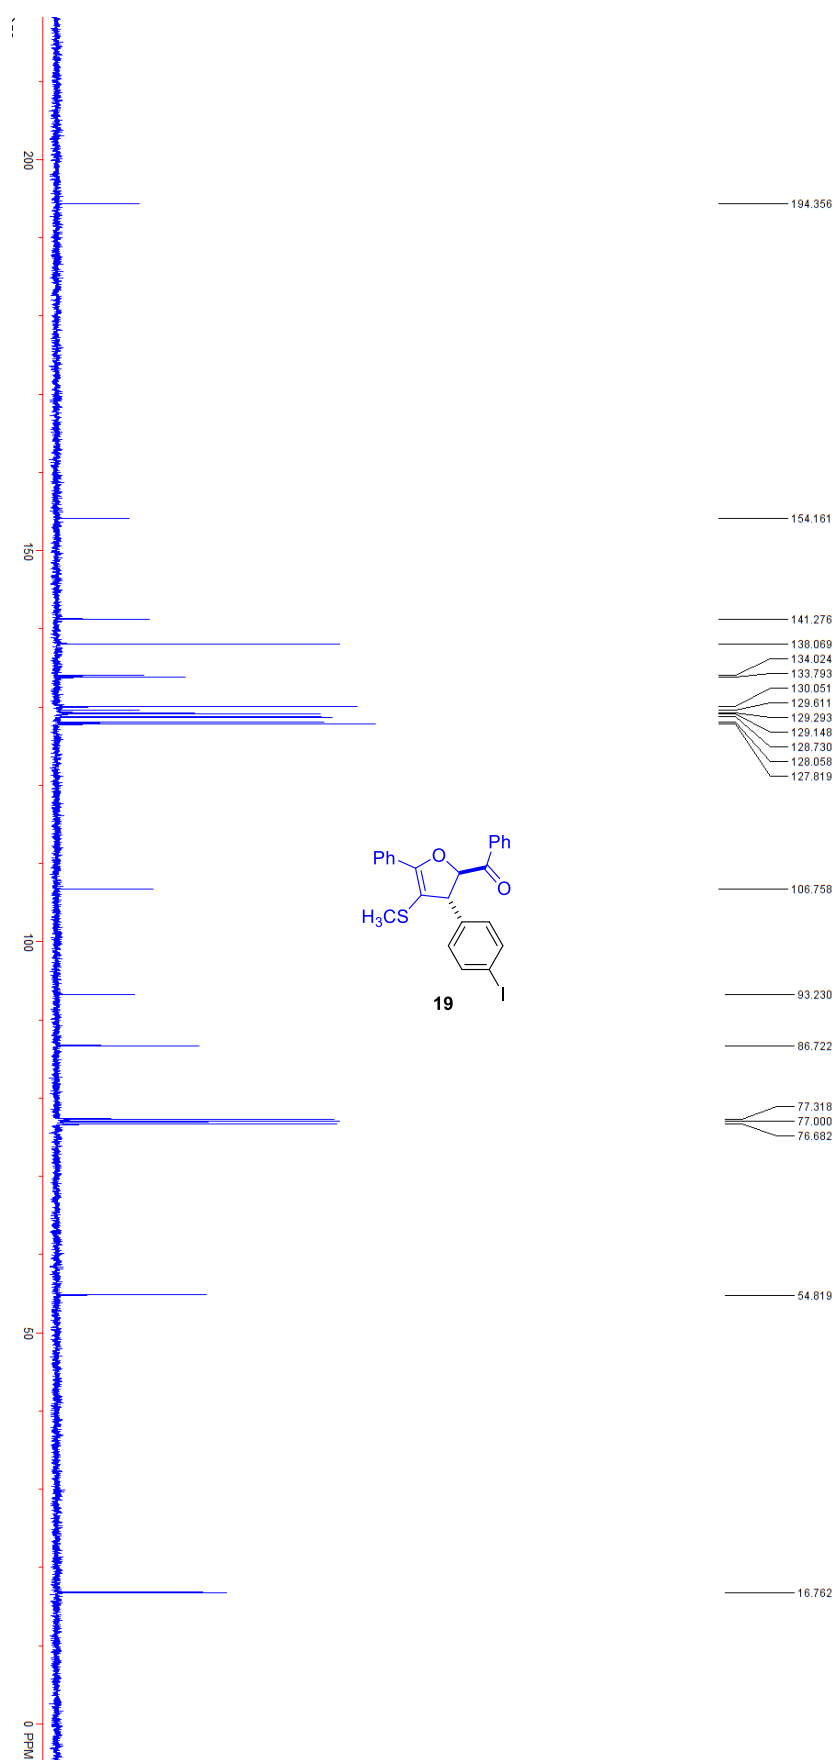

$^1\text{H}$  NMR spectrum of product **20** (400 MHz,  $\text{CDCl}_3$ )

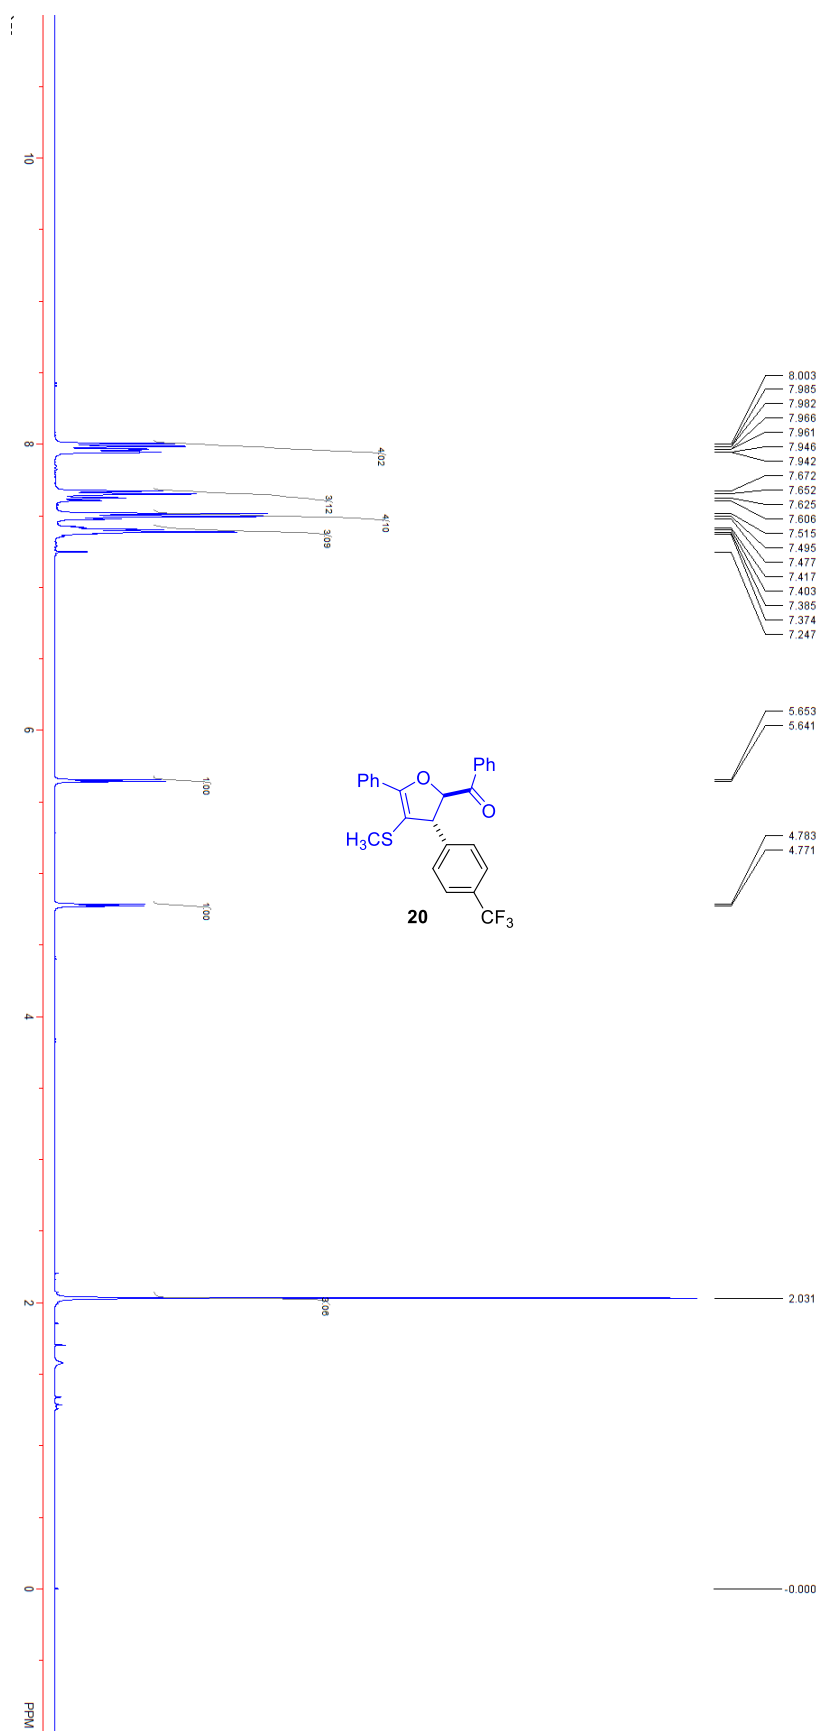

$^{13}\text{C}$  NMR spectrum of product **20** (100 MHz,  $\text{CDCl}_3$ )

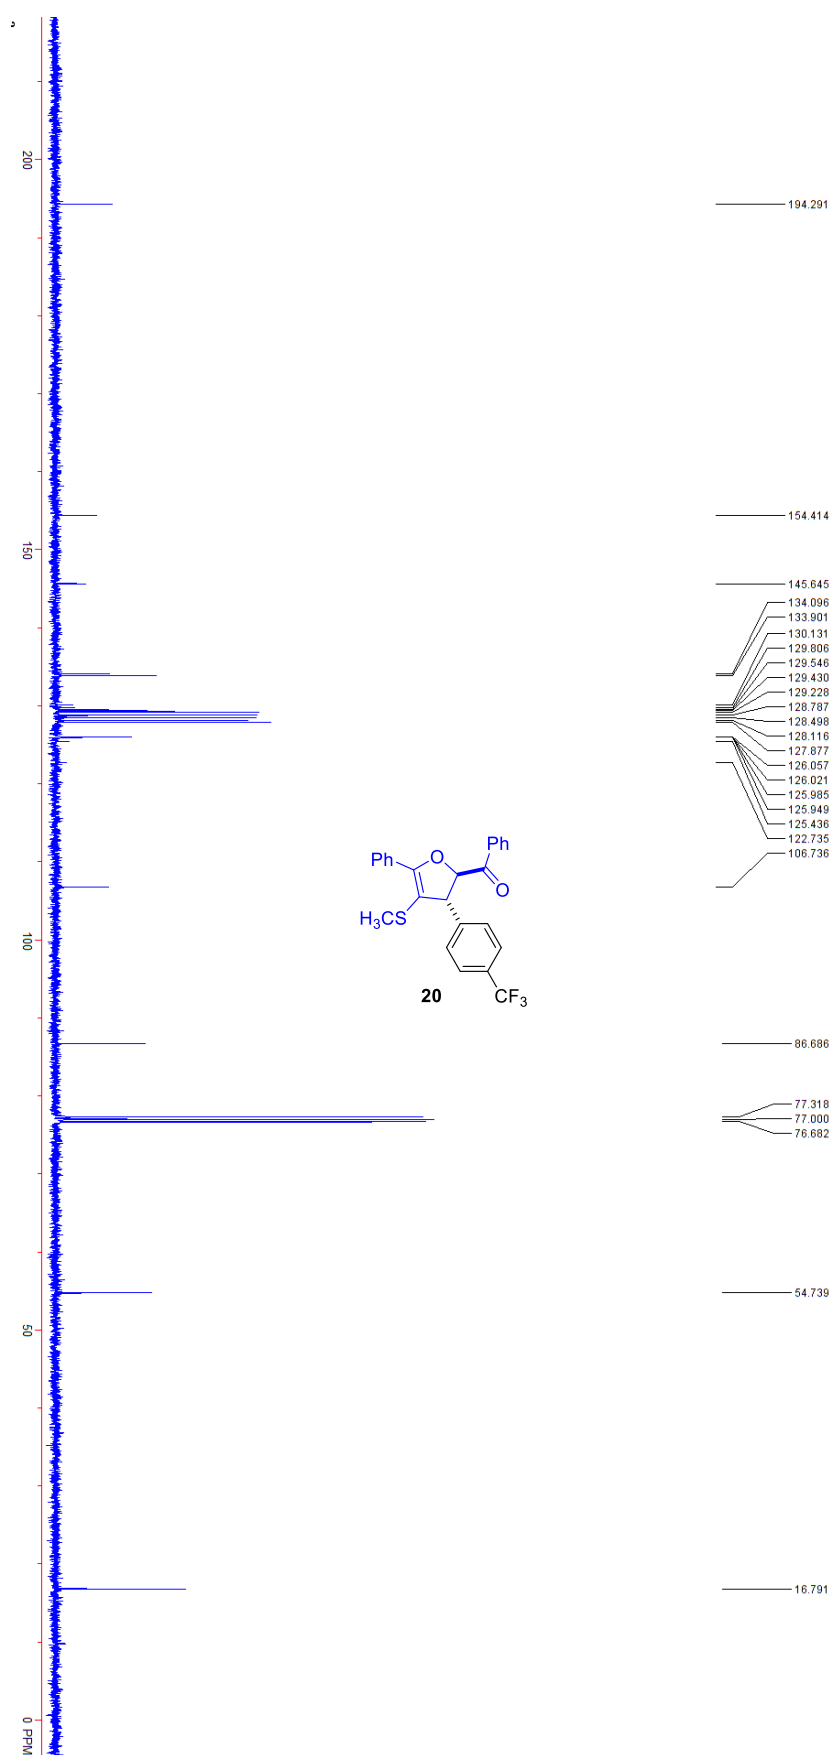

$^{19}\text{F}$  NMR spectrum of product **20** (376 MHz,  $\text{CDCl}_3$ )

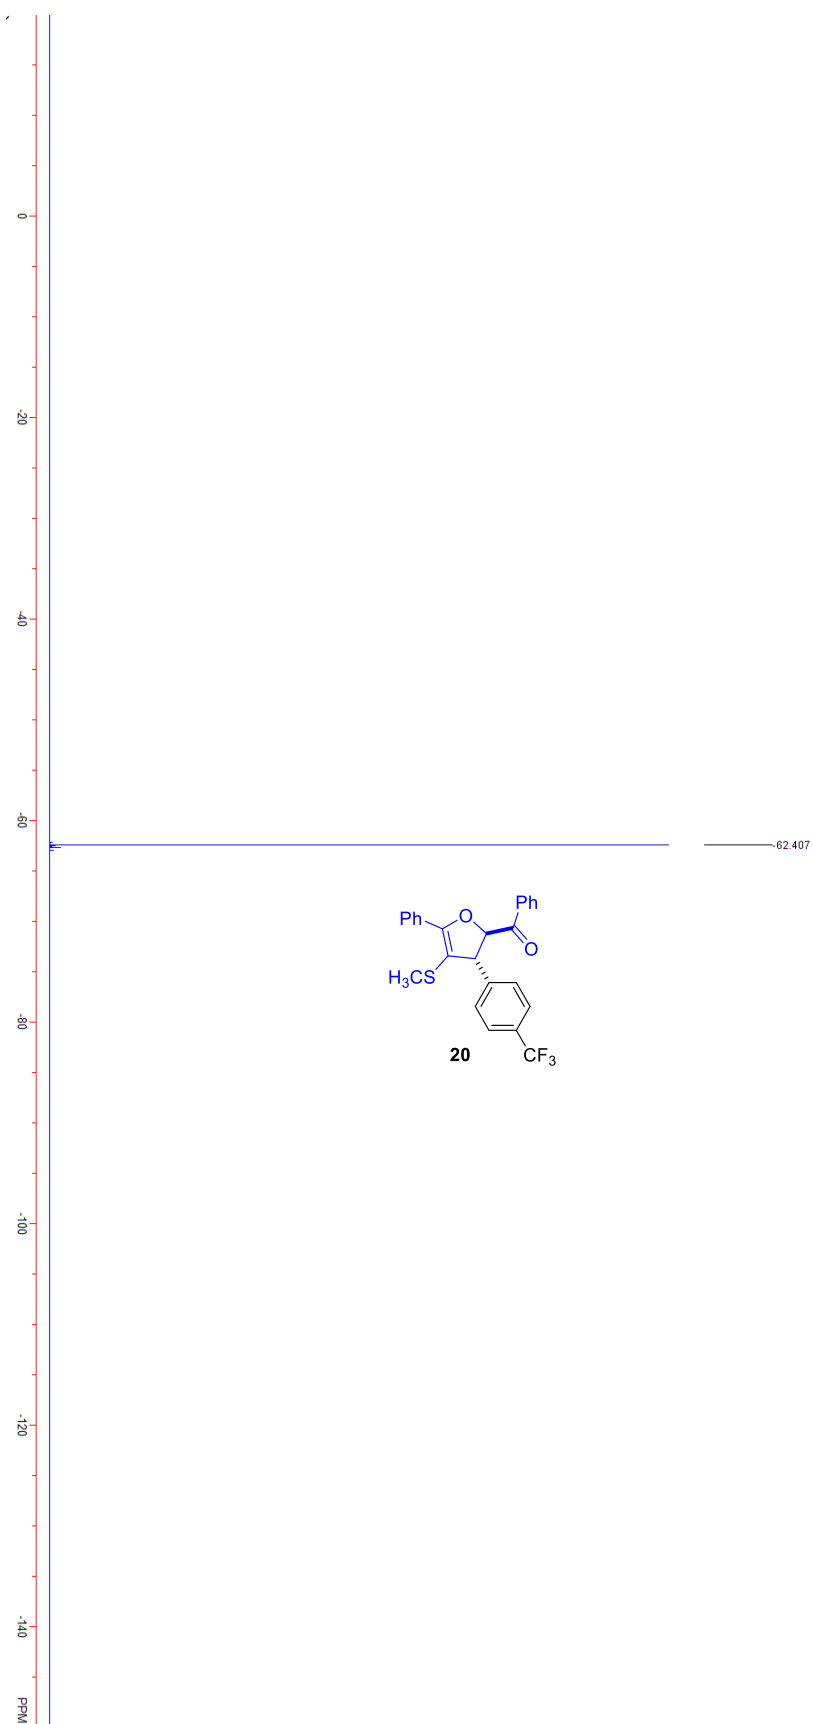

$^1\text{H}$  NMR spectrum of product **21** (400 MHz,  $\text{CDCl}_3$ )

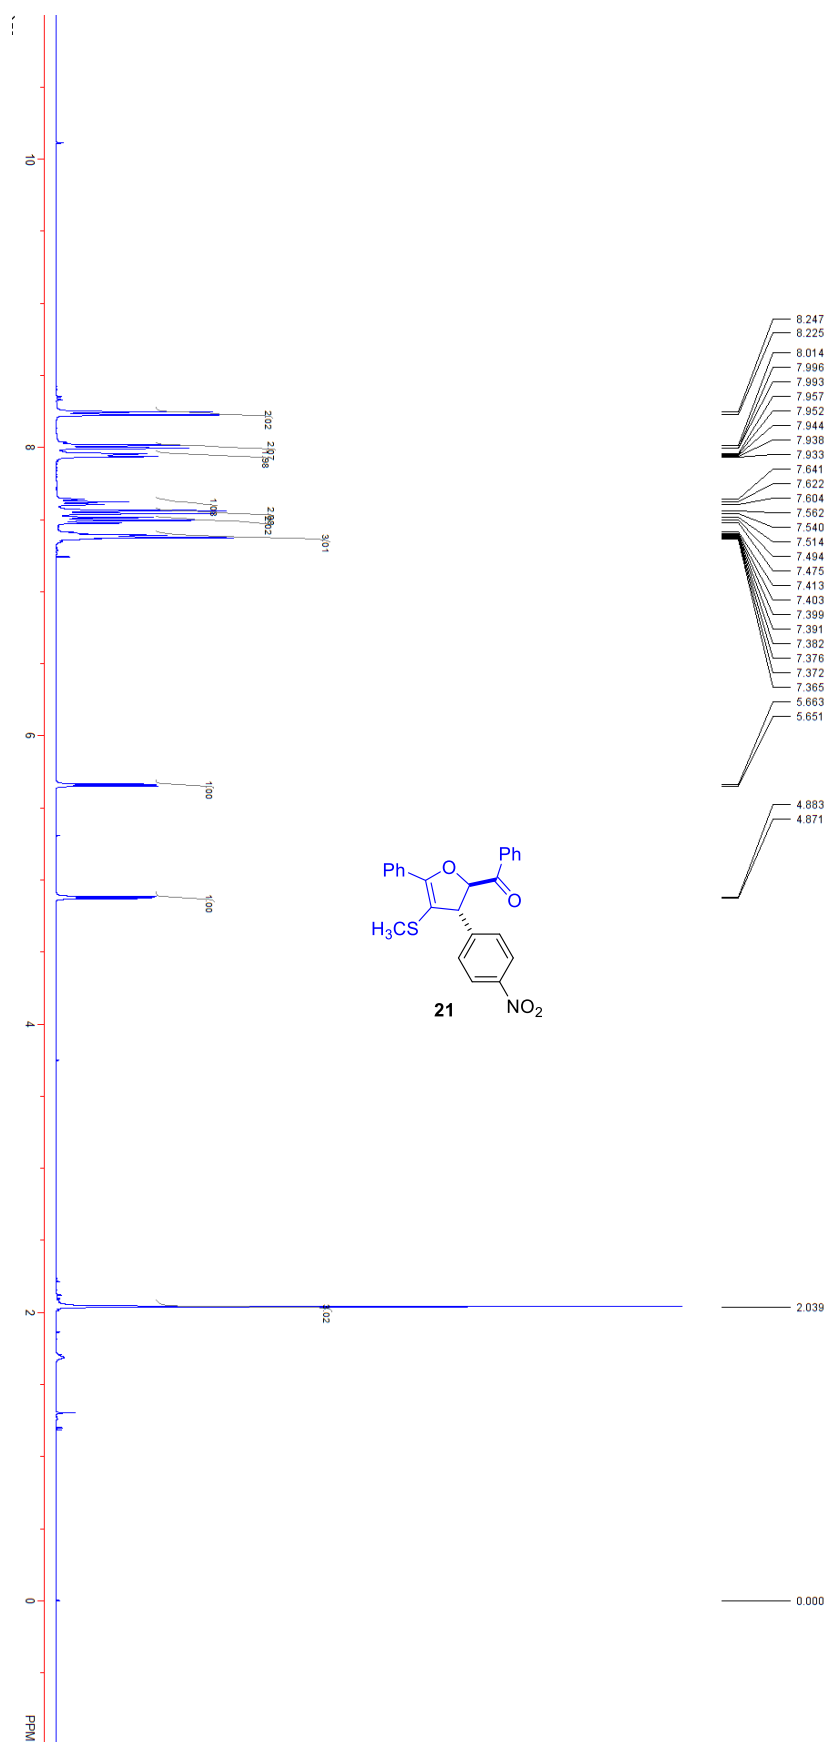

$^{13}\text{C}$  NMR spectrum of product **21** (100 MHz,  $\text{CDCl}_3$ )

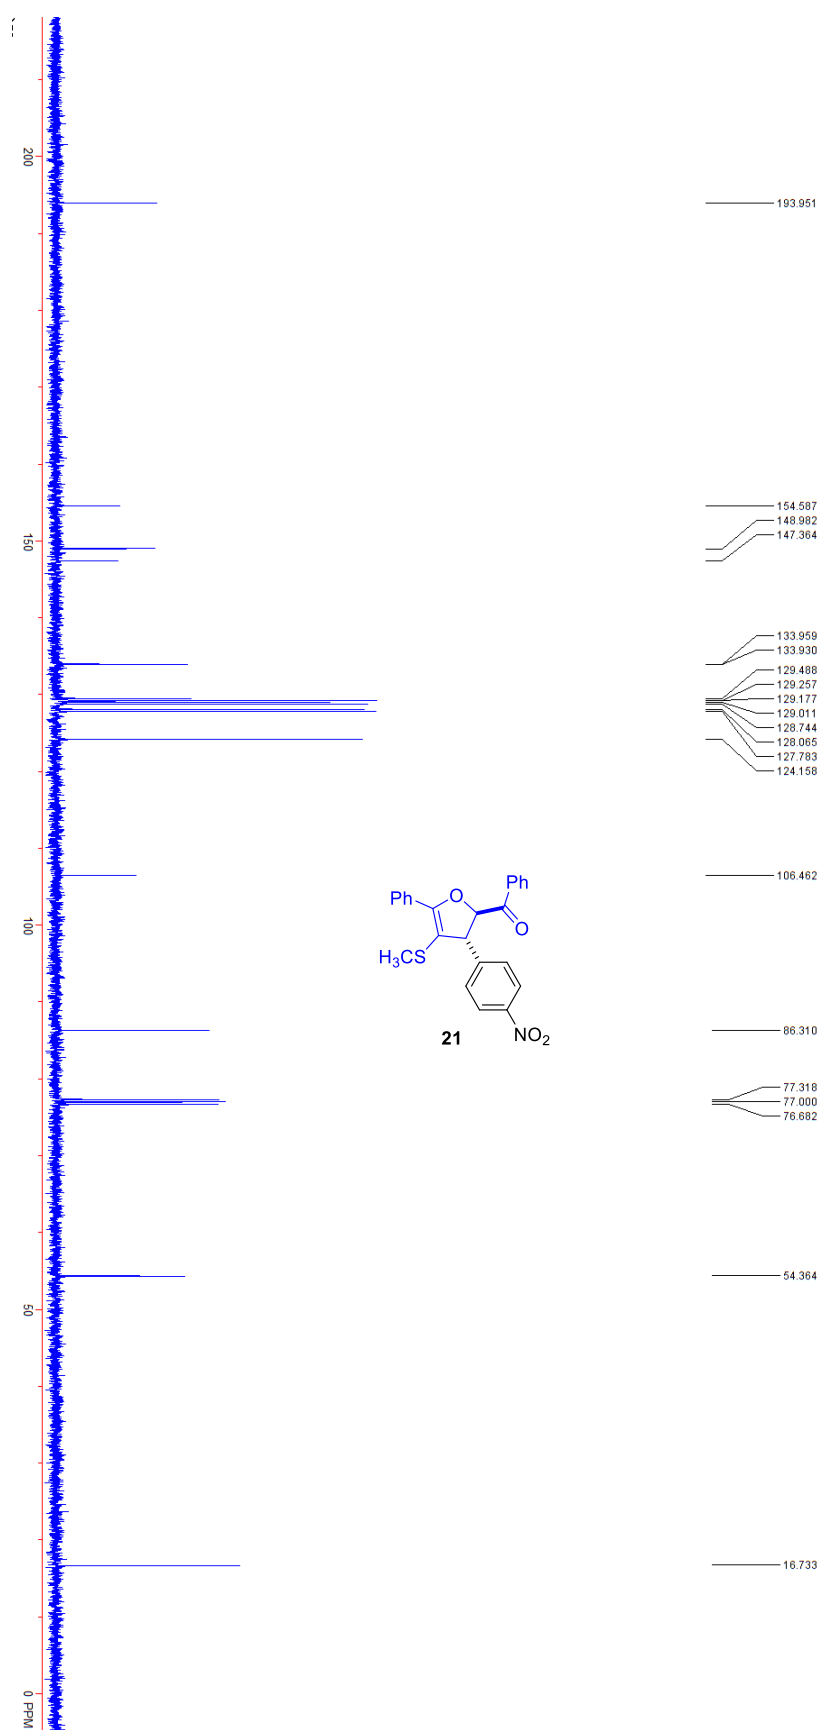



$^1\text{H}$  NMR spectrum of product **22** (400 MHz,  $\text{CDCl}_3$ )

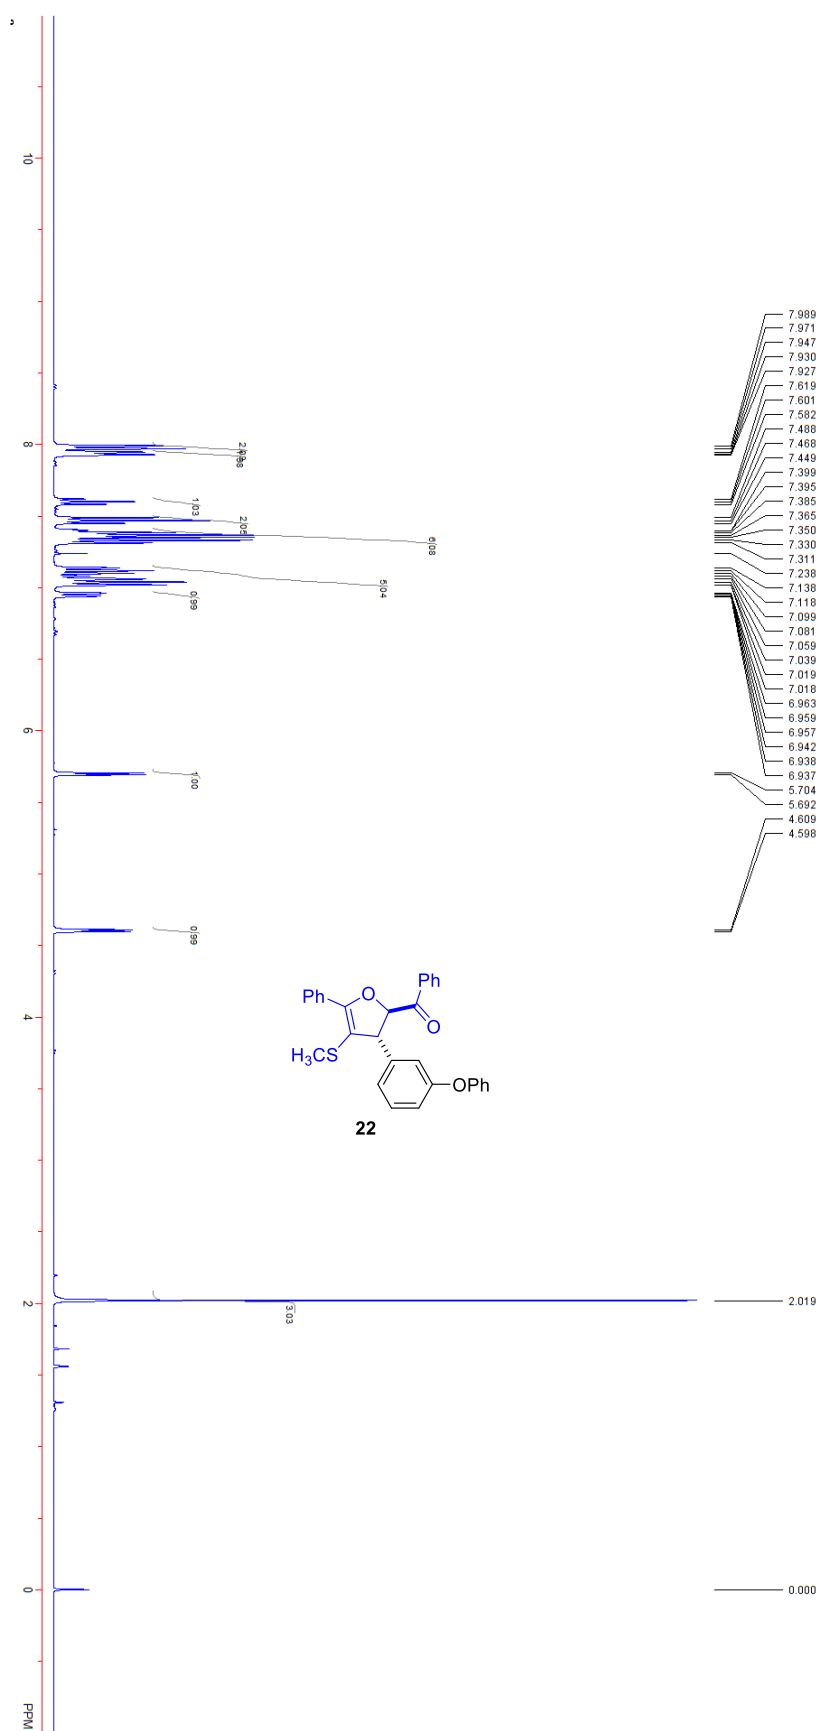

$^{13}\text{C}$  NMR spectrum of product **22** (100 MHz,  $\text{CDCl}_3$ )

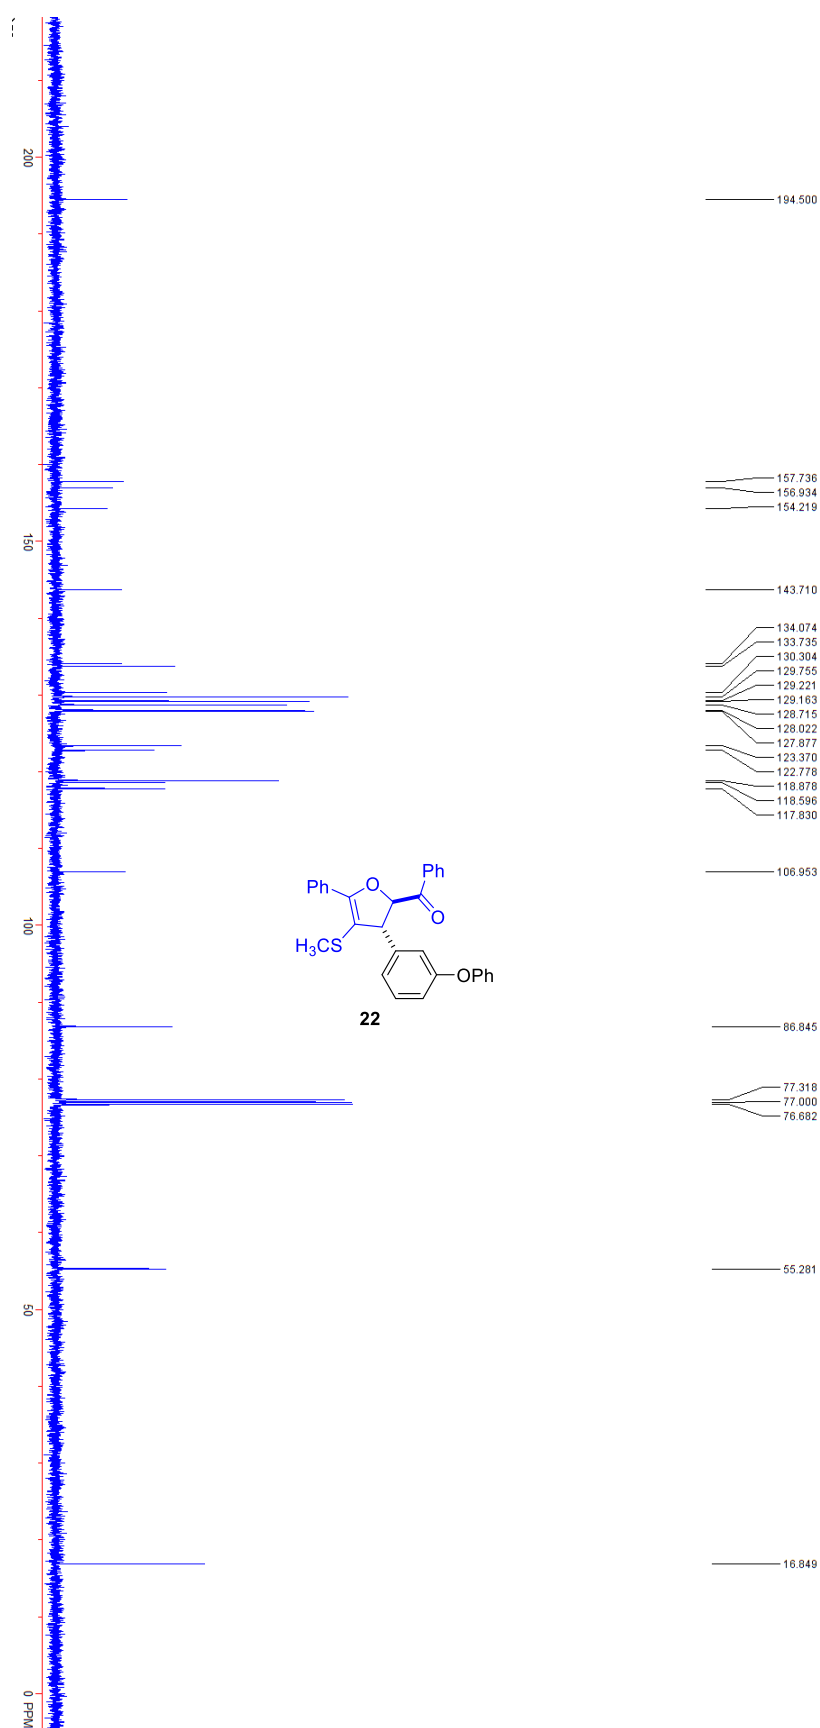

$^1\text{H}$  NMR spectrum of product **23** (400 MHz,  $\text{CDCl}_3$ )

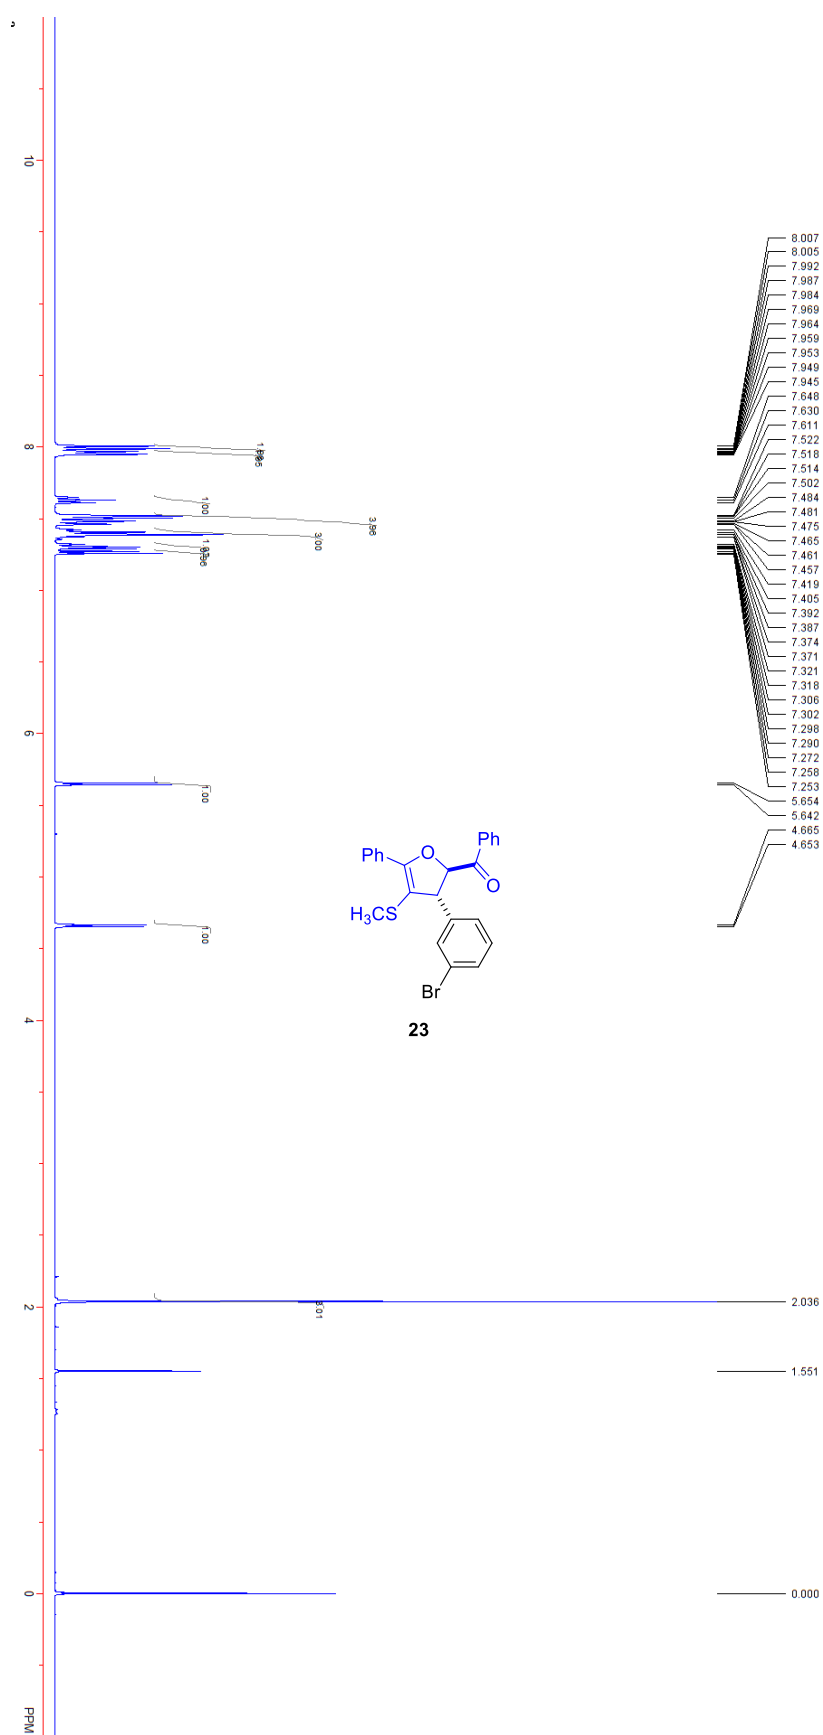

$^{13}\text{C}$  NMR spectrum of product **23** (100 MHz,  $\text{CDCl}_3$ )

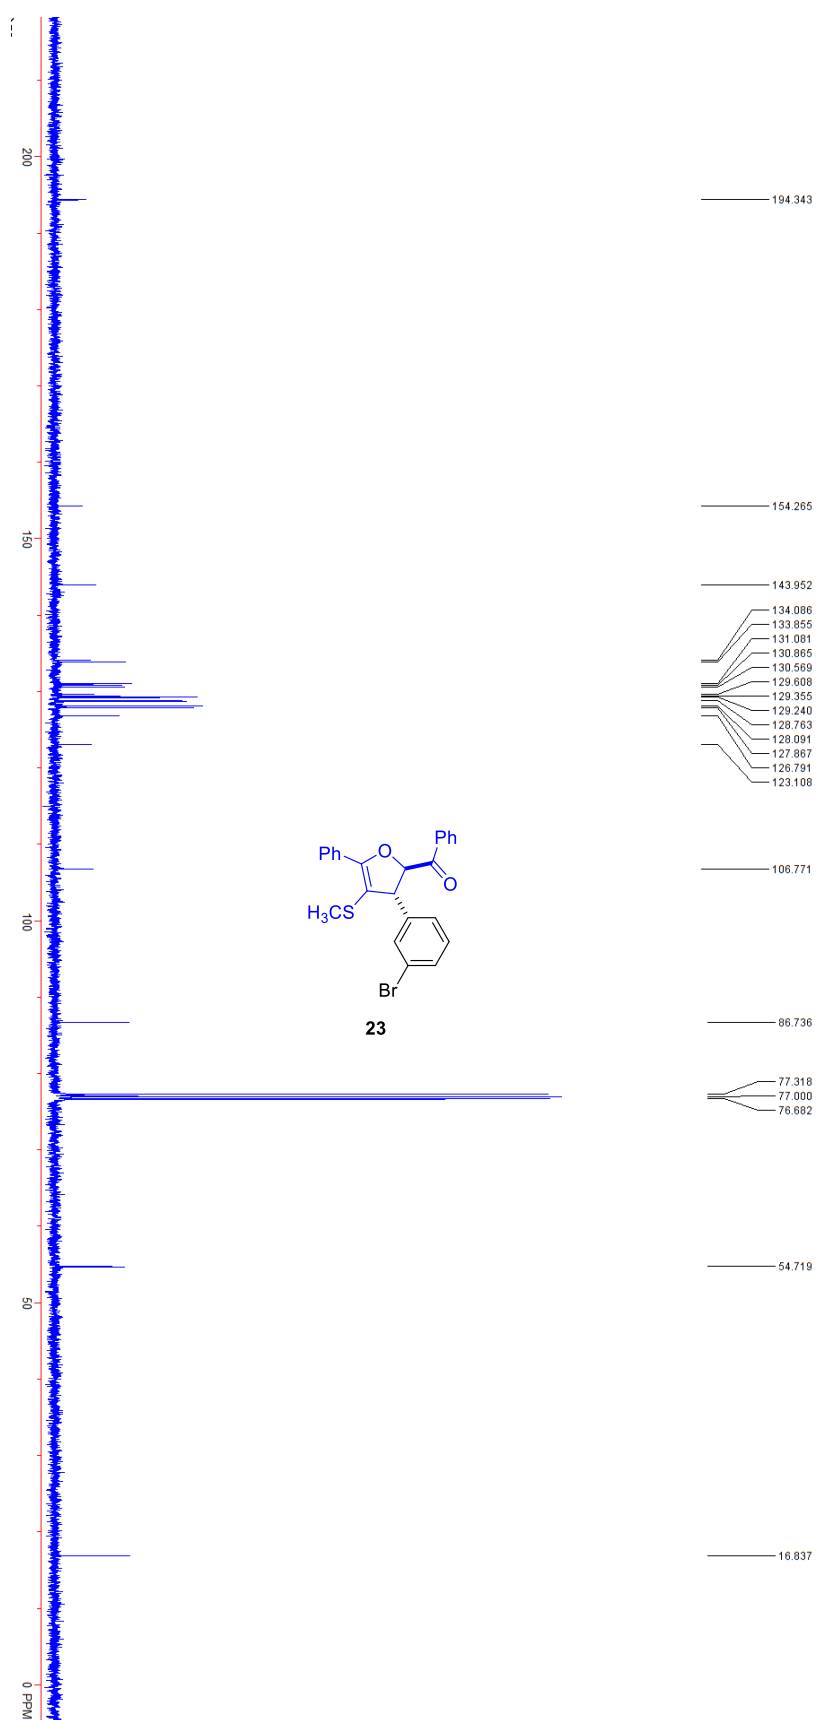

<sup>1</sup>H NMR spectrum of product **24** (400 MHz, CDCl<sub>3</sub>)

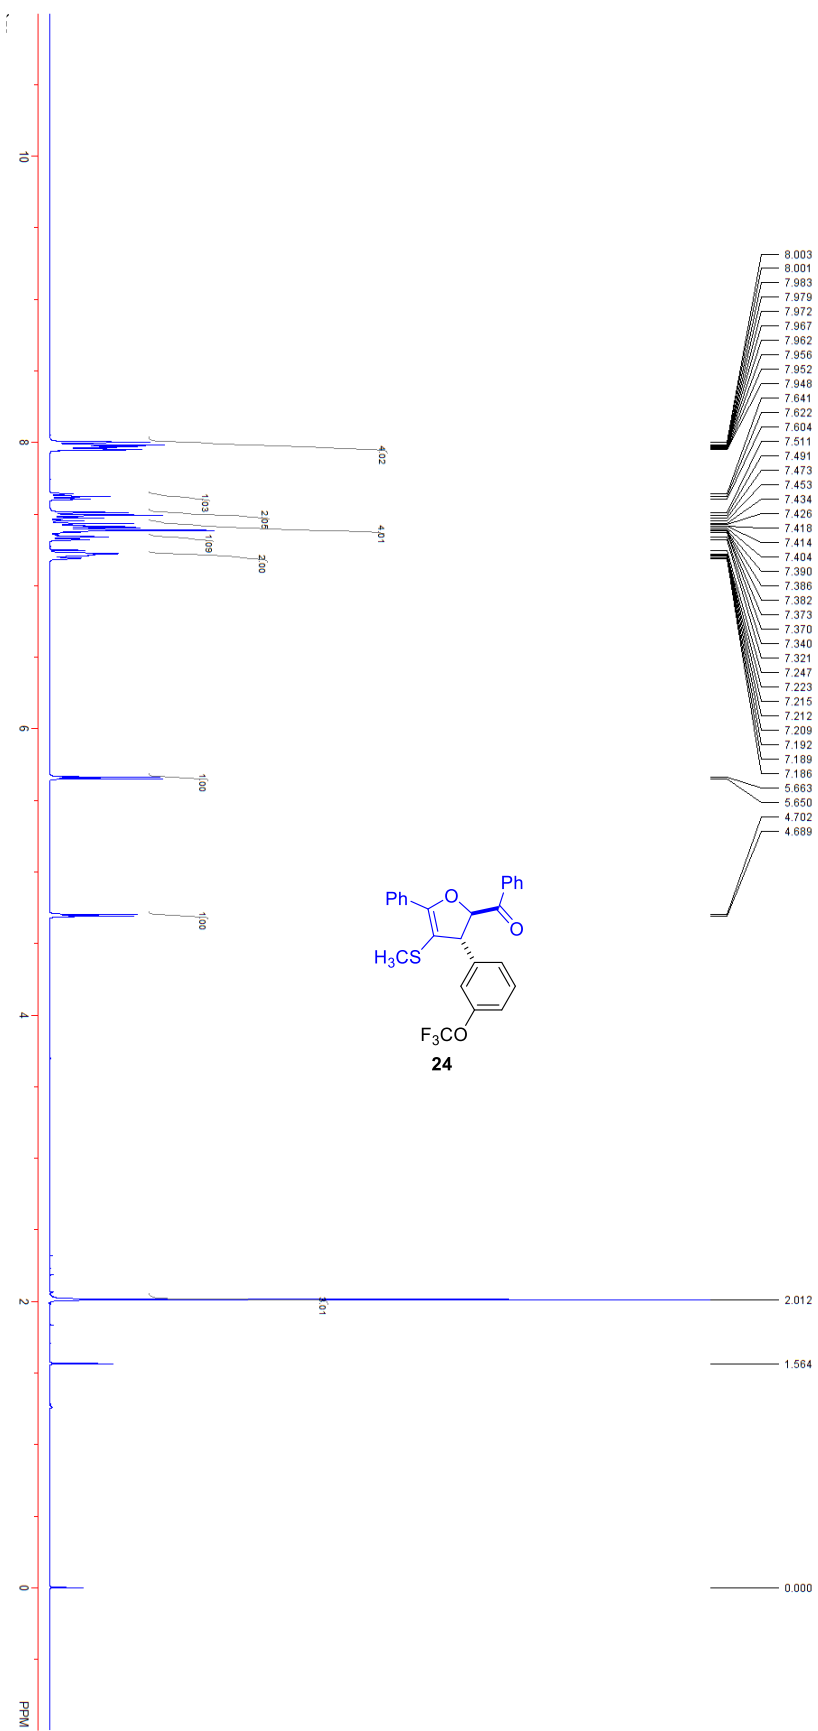

$^{13}\text{C}$  NMR spectrum of product **24** (100 MHz,  $\text{CDCl}_3$ )

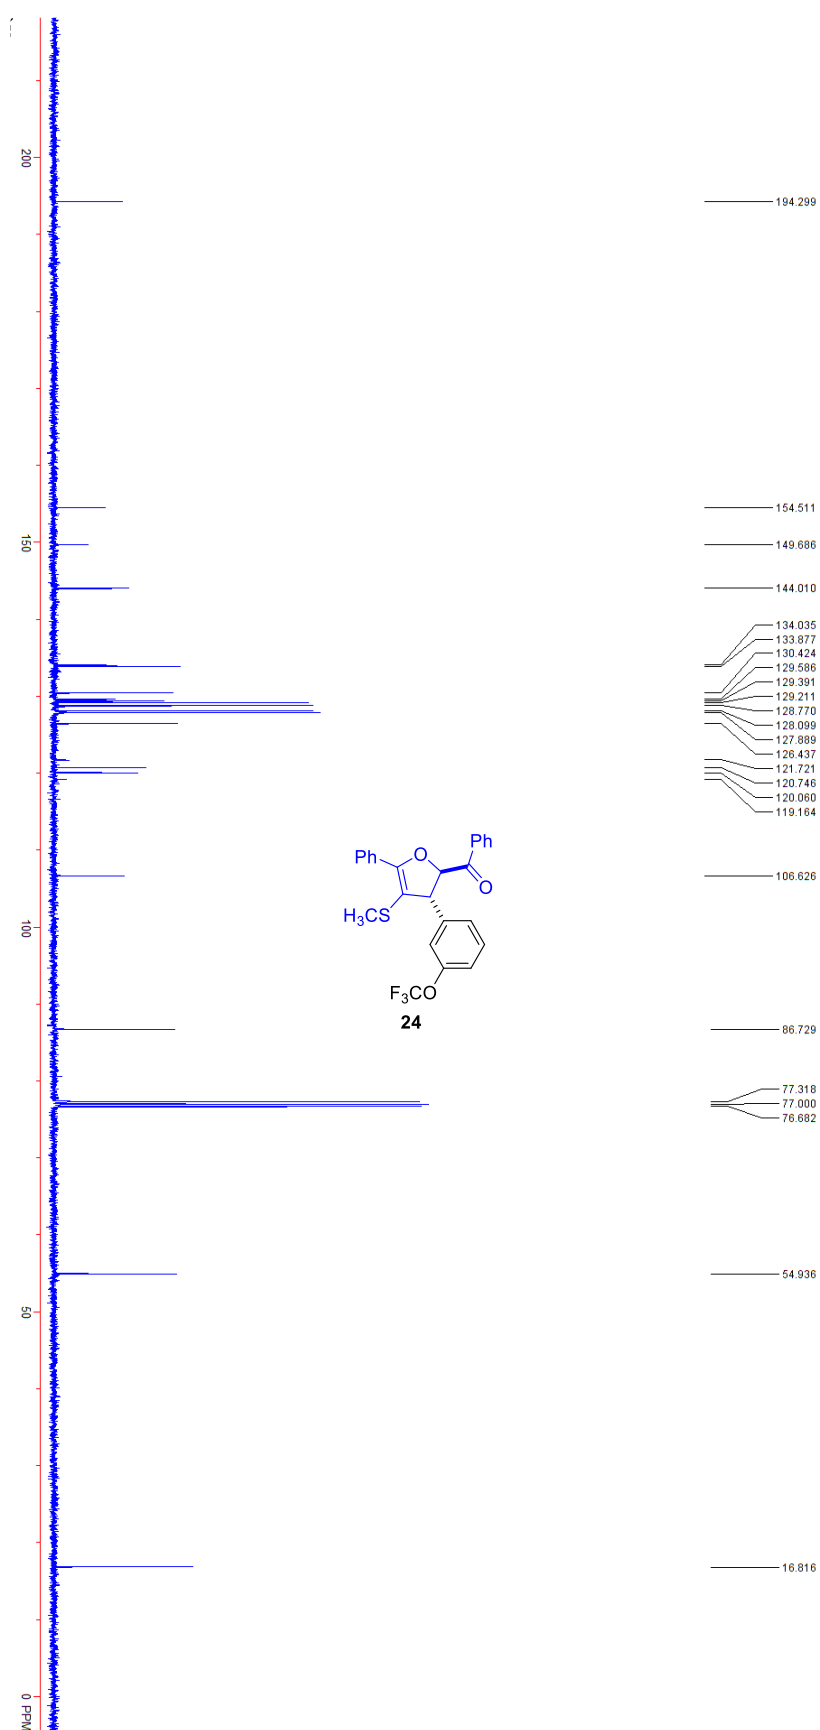

$^{19}\text{F}$  NMR spectrum of product **24** (376 MHz,  $\text{CDCl}_3$ )

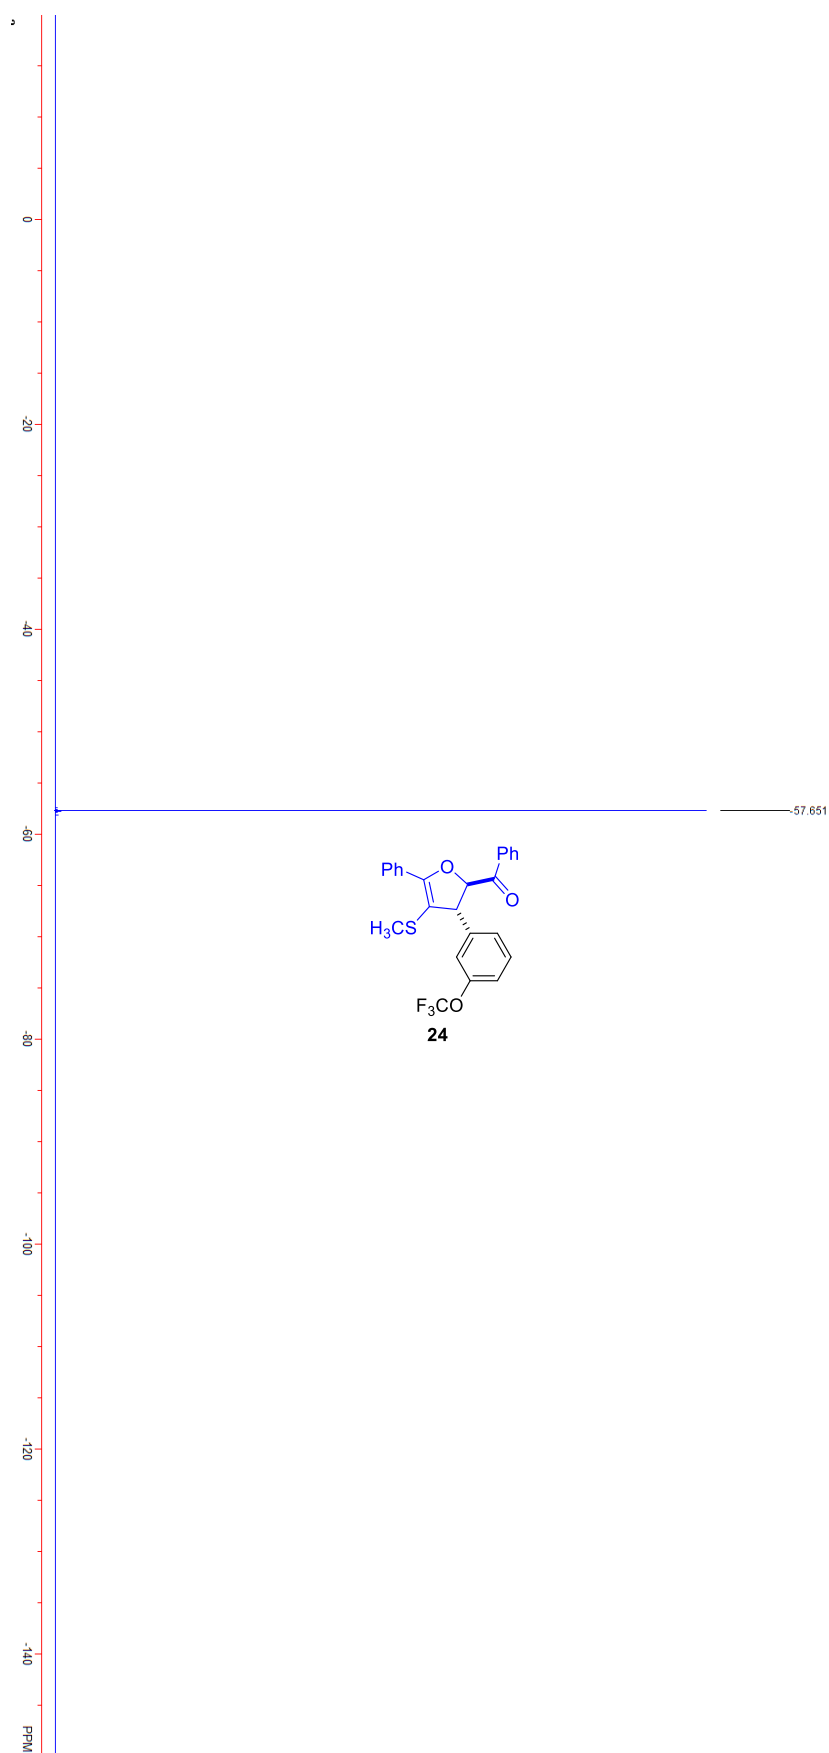

$^1\text{H}$  NMR spectrum of product **25** (400 MHz,  $\text{CDCl}_3$ )

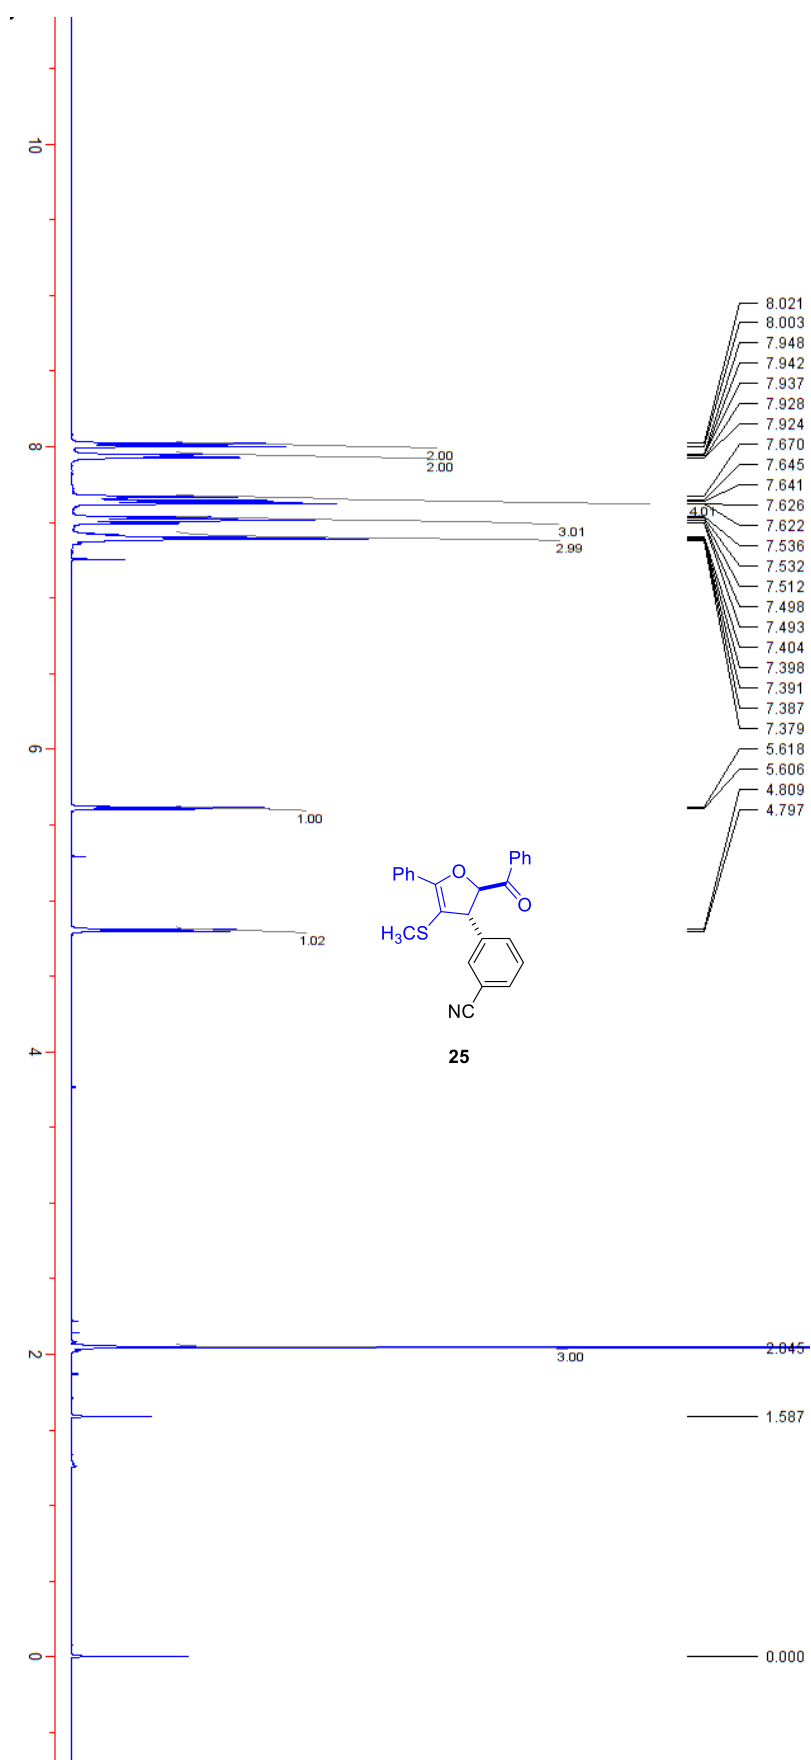



$^{13}\text{C}$  NMR spectrum of product **25** (100 MHz,  $\text{CDCl}_3$ )

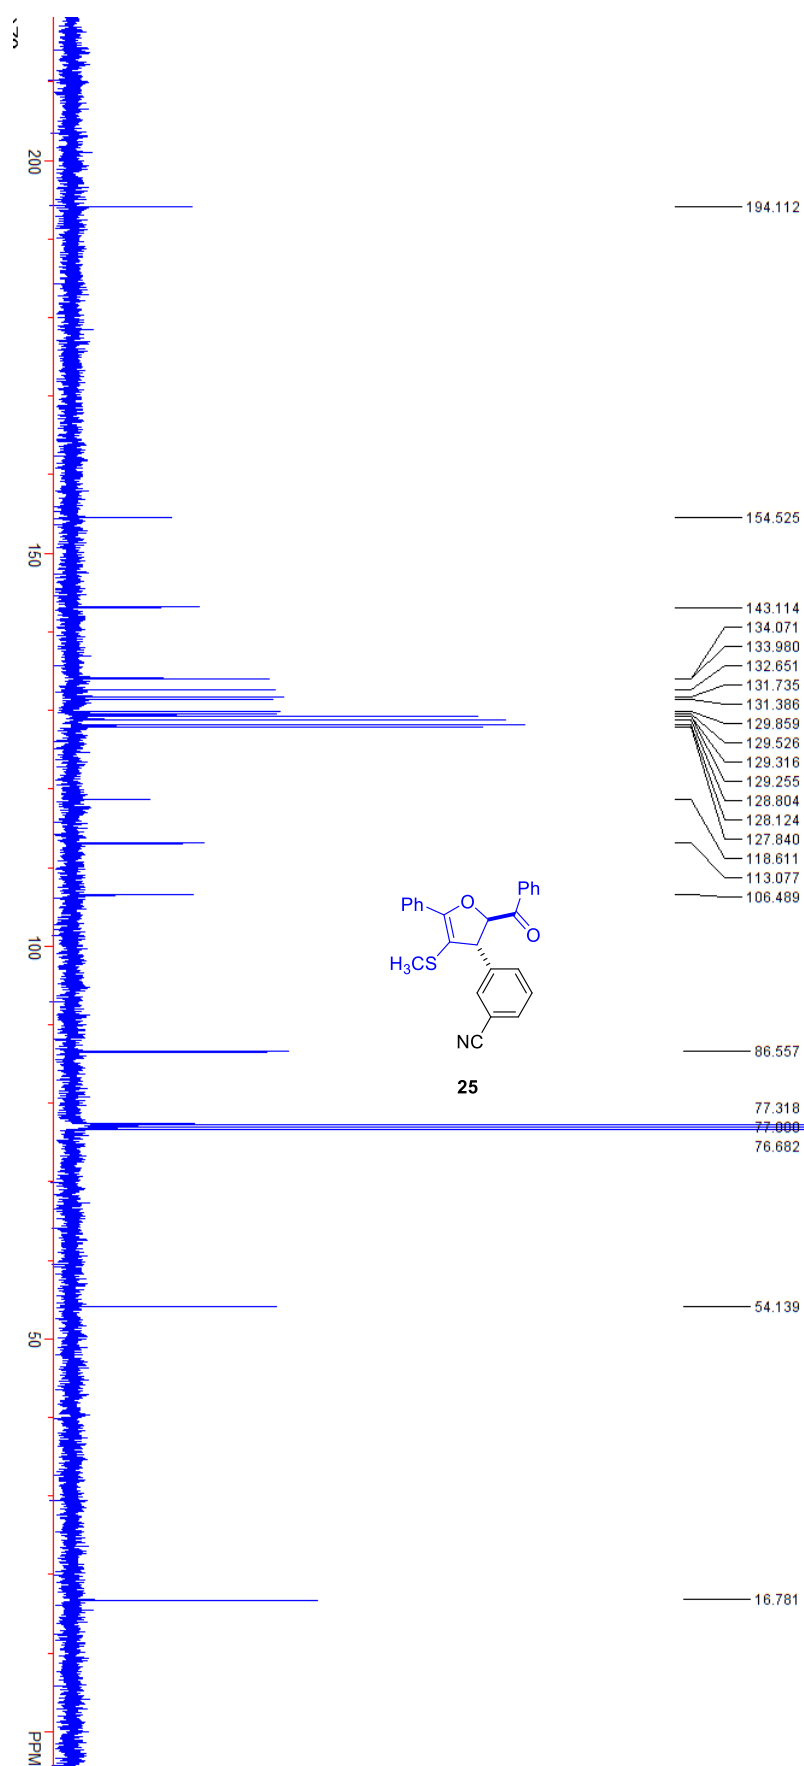

$^1\text{H}$  NMR spectrum of product **26** (400 MHz,  $\text{CDCl}_3$ )

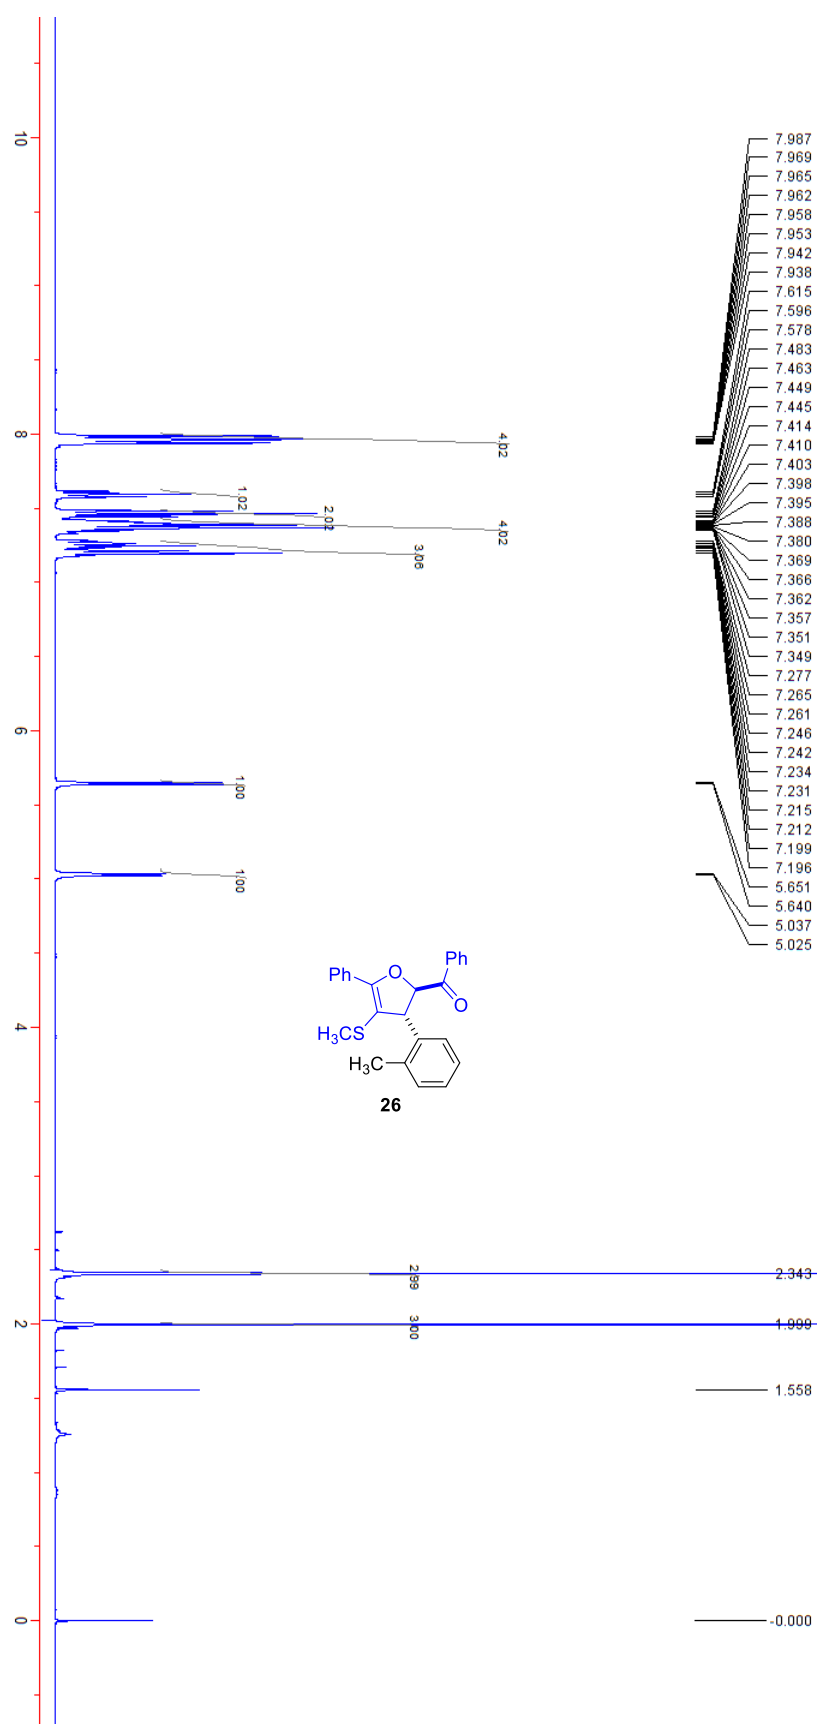

$^{13}\text{C}$  NMR spectrum of product **26** (100 MHz,  $\text{CDCl}_3$ )

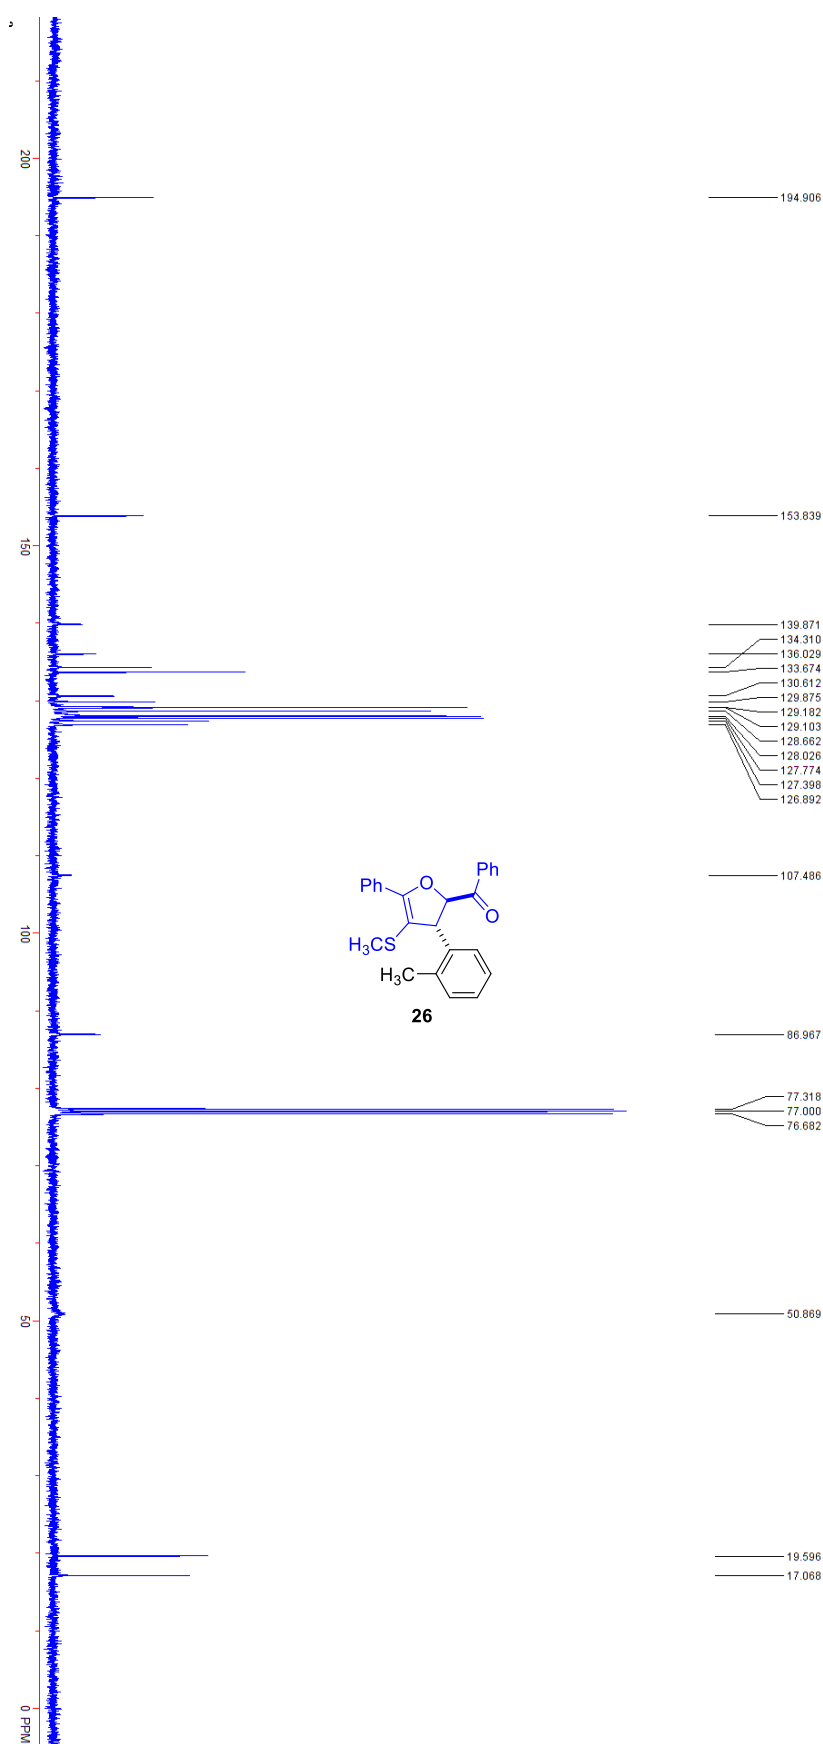

$^1\text{H}$  NMR spectrum of product **27** (400 MHz,  $\text{CDCl}_3$ )

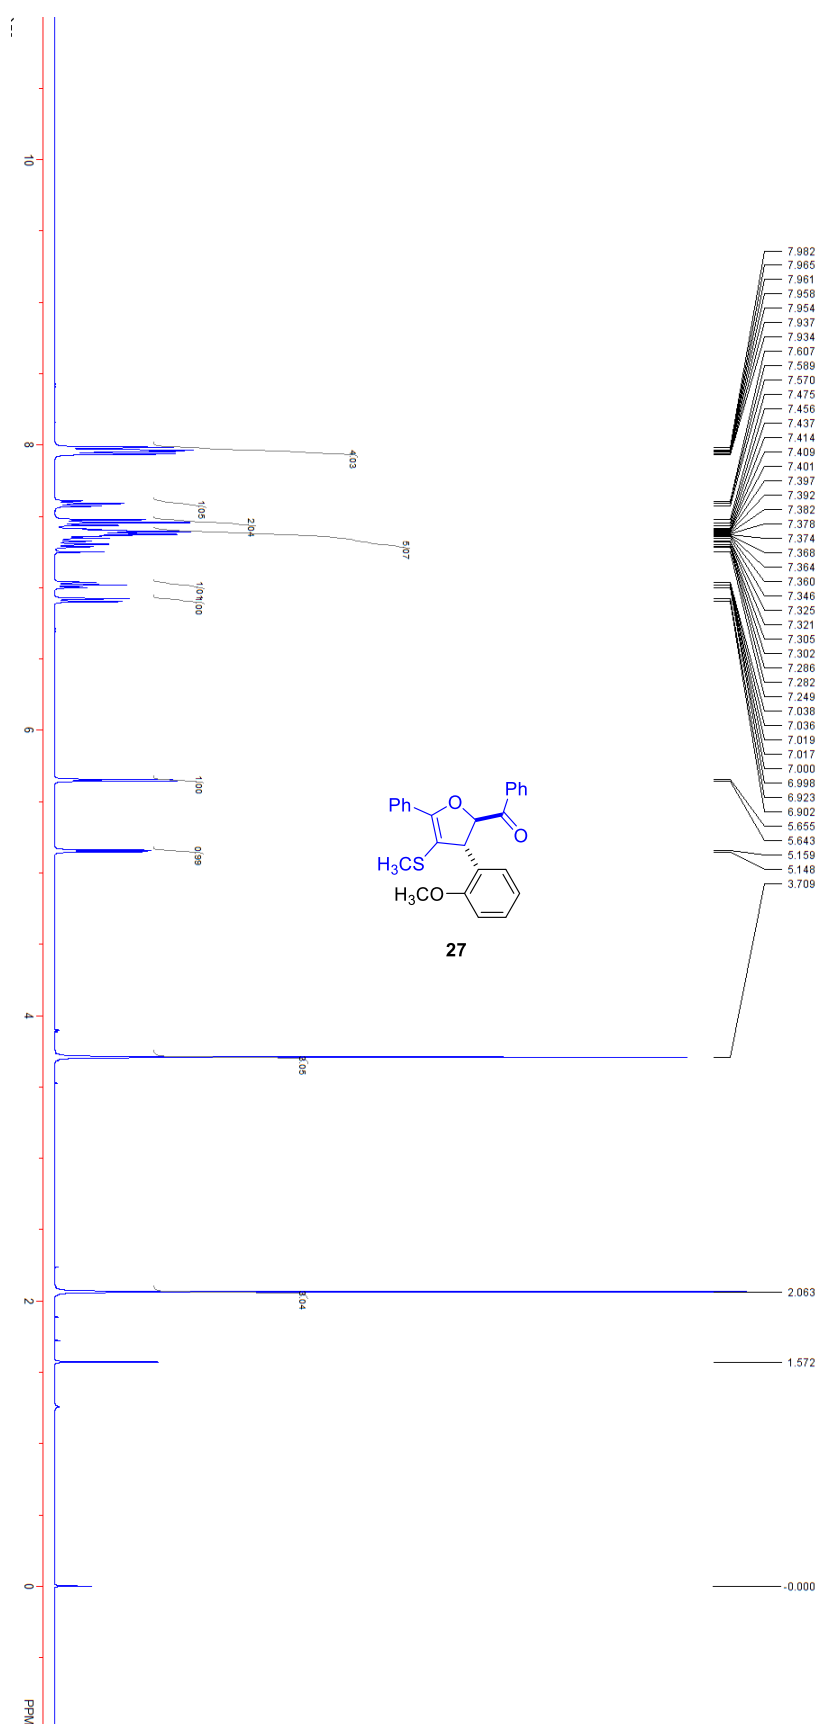

$^{13}\text{C}$  NMR spectrum of product **27** (100 MHz,  $\text{CDCl}_3$ )

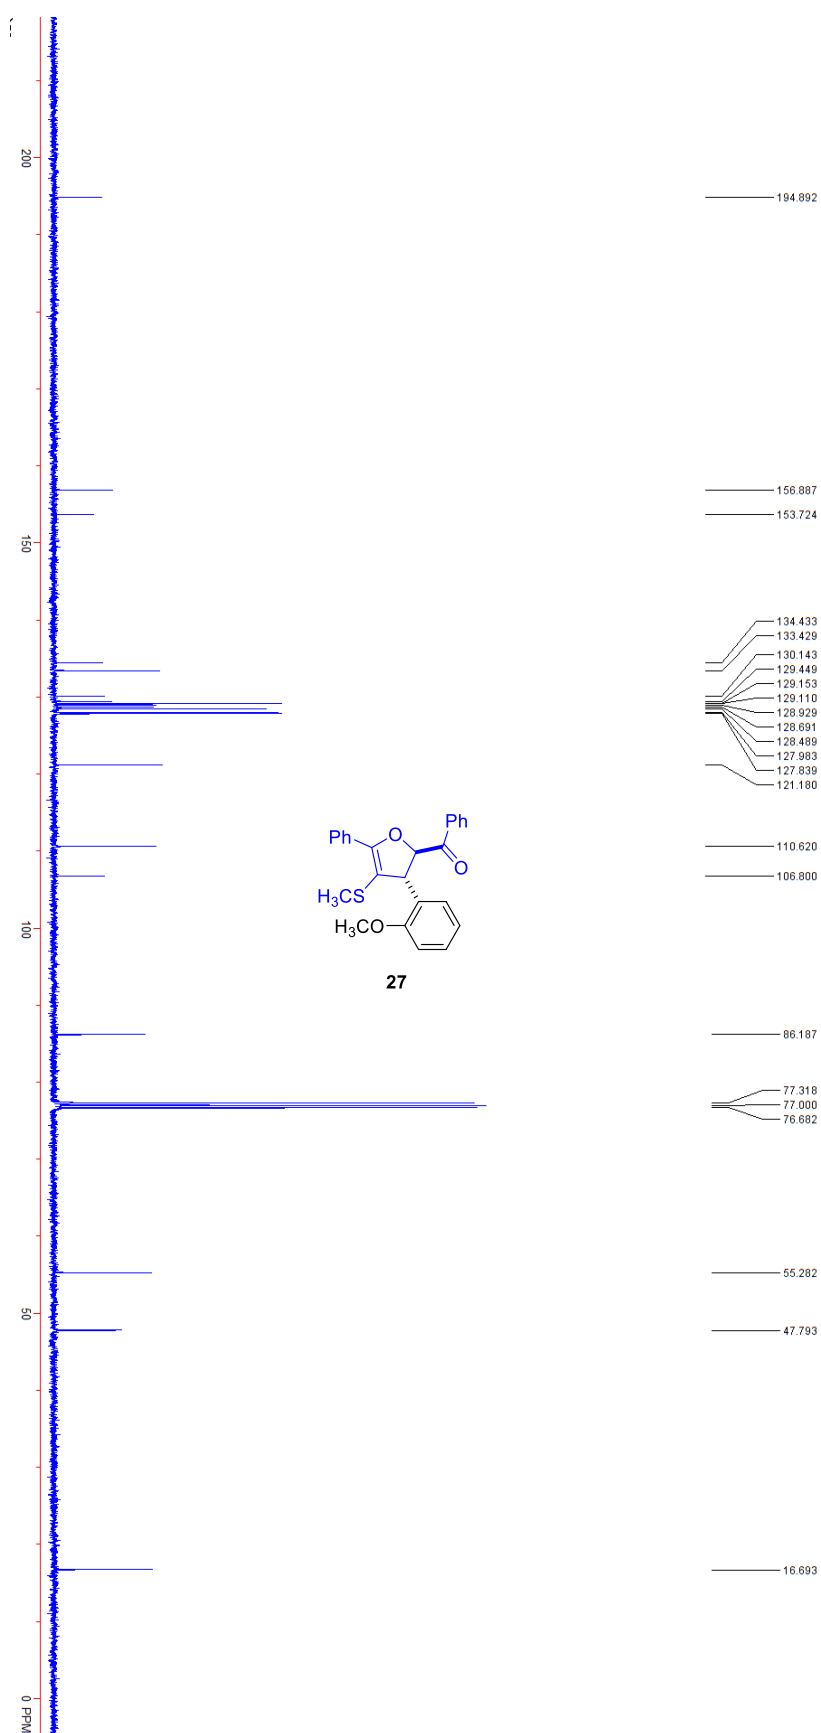

$^1\text{H}$  NMR spectrum of product **28** (400 MHz,  $\text{CDCl}_3$ )

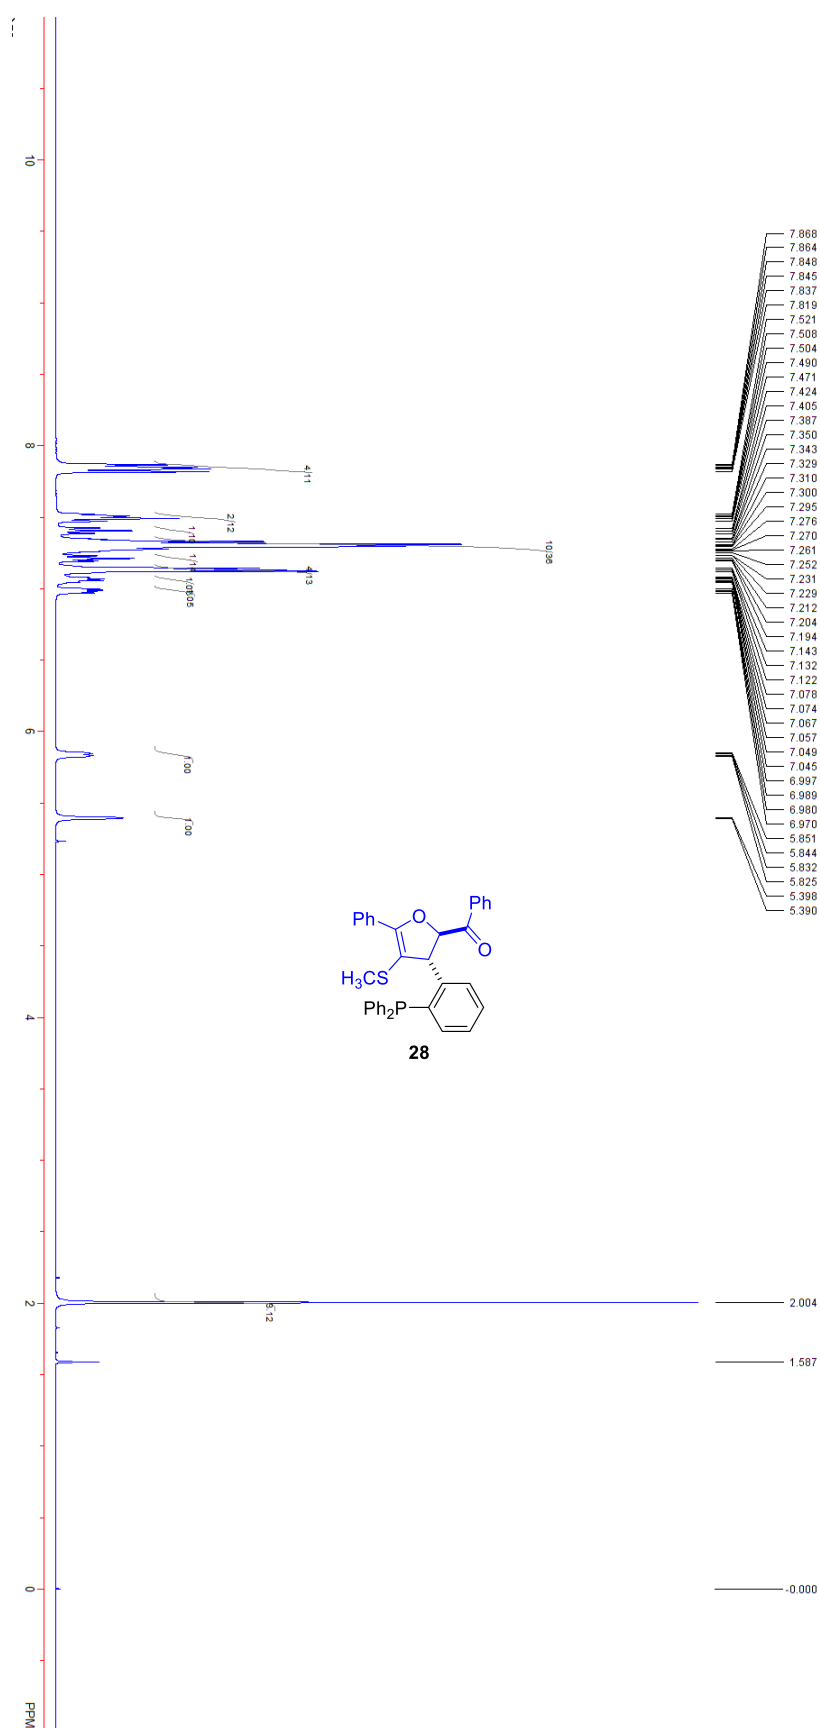

$^{13}\text{C}$  NMR spectrum of product **28** (100 MHz,  $\text{CDCl}_3$ )

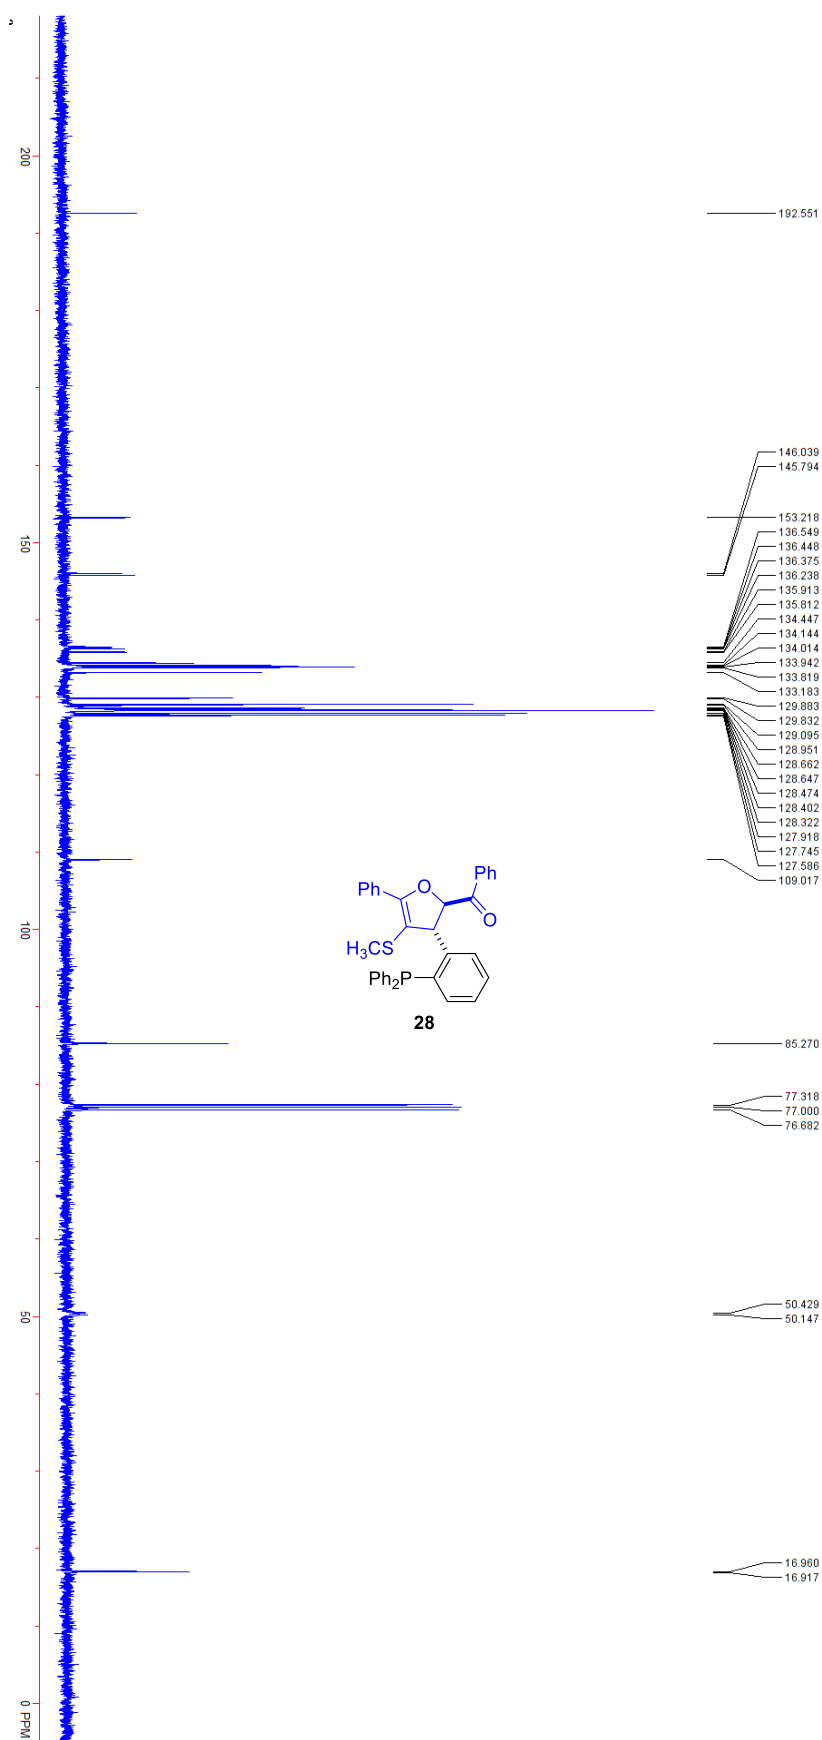

$^{31}\text{P}$  NMR spectrum of product **28** (162 MHz,  $\text{CDCl}_3$ )

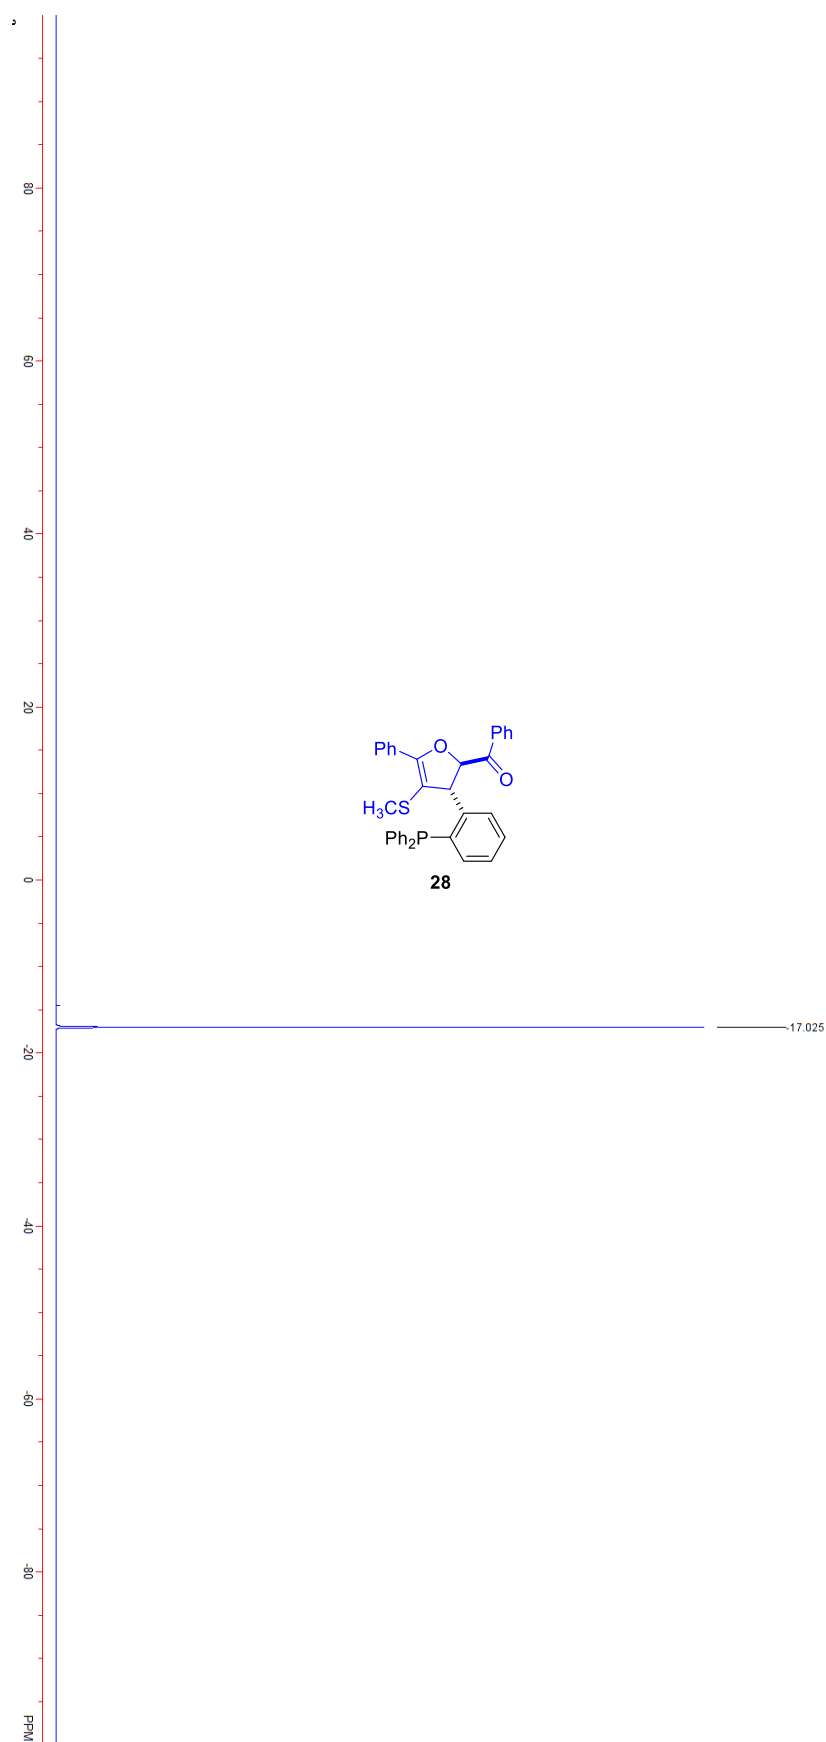



$^1\text{H}$  NMR spectrum of product **29** (400 MHz,  $\text{CDCl}_3$ )

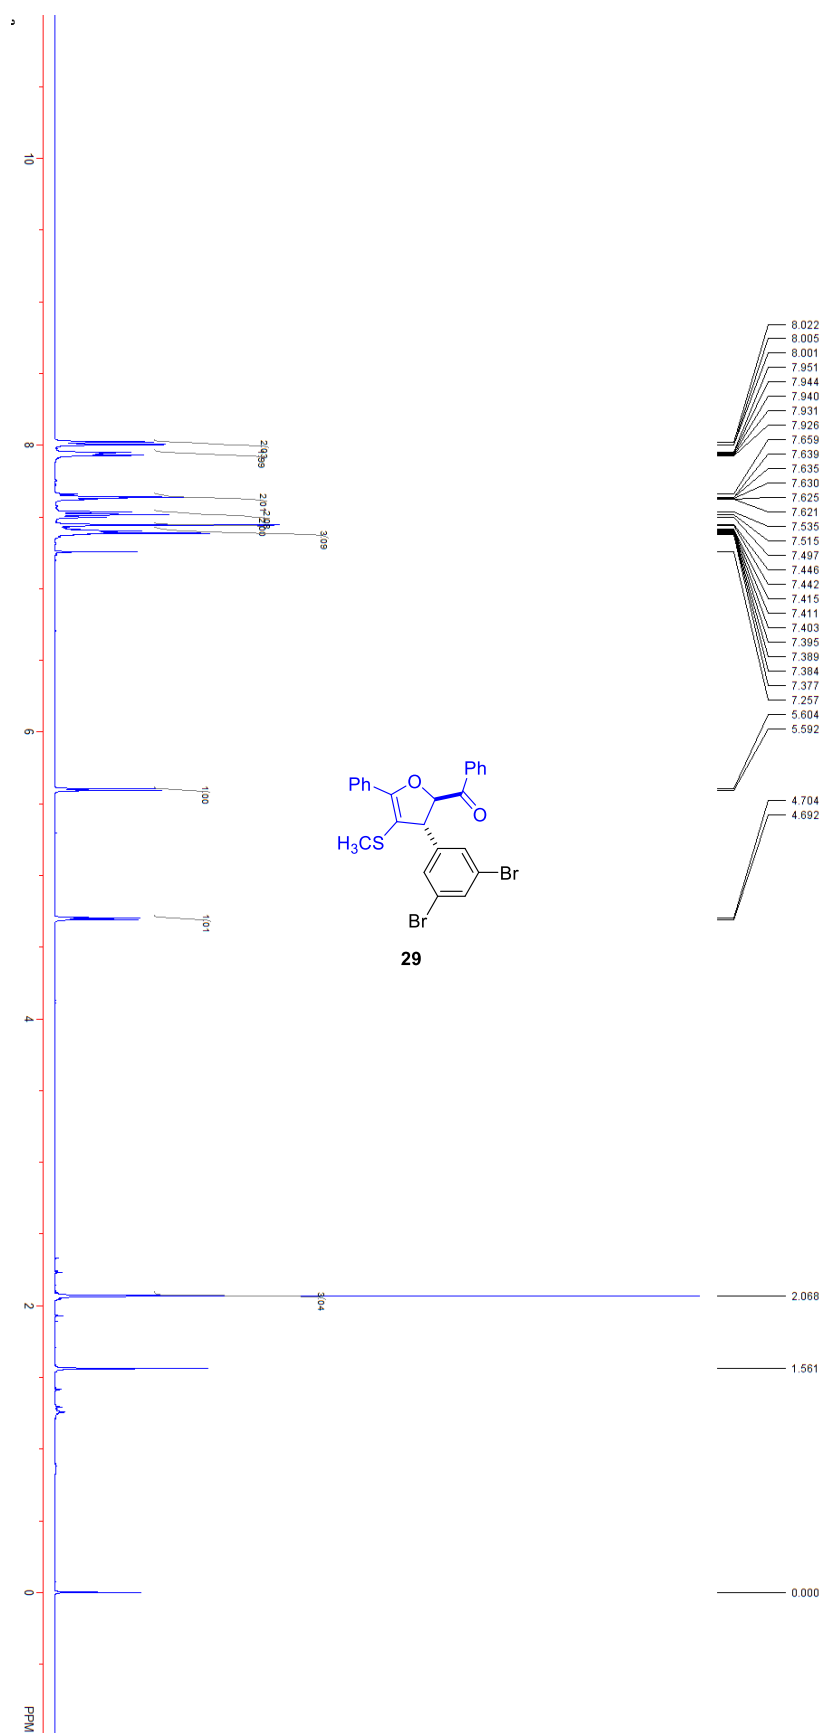

$^{13}\text{C}$  NMR spectrum of product **29** (100 MHz,  $\text{CDCl}_3$ )

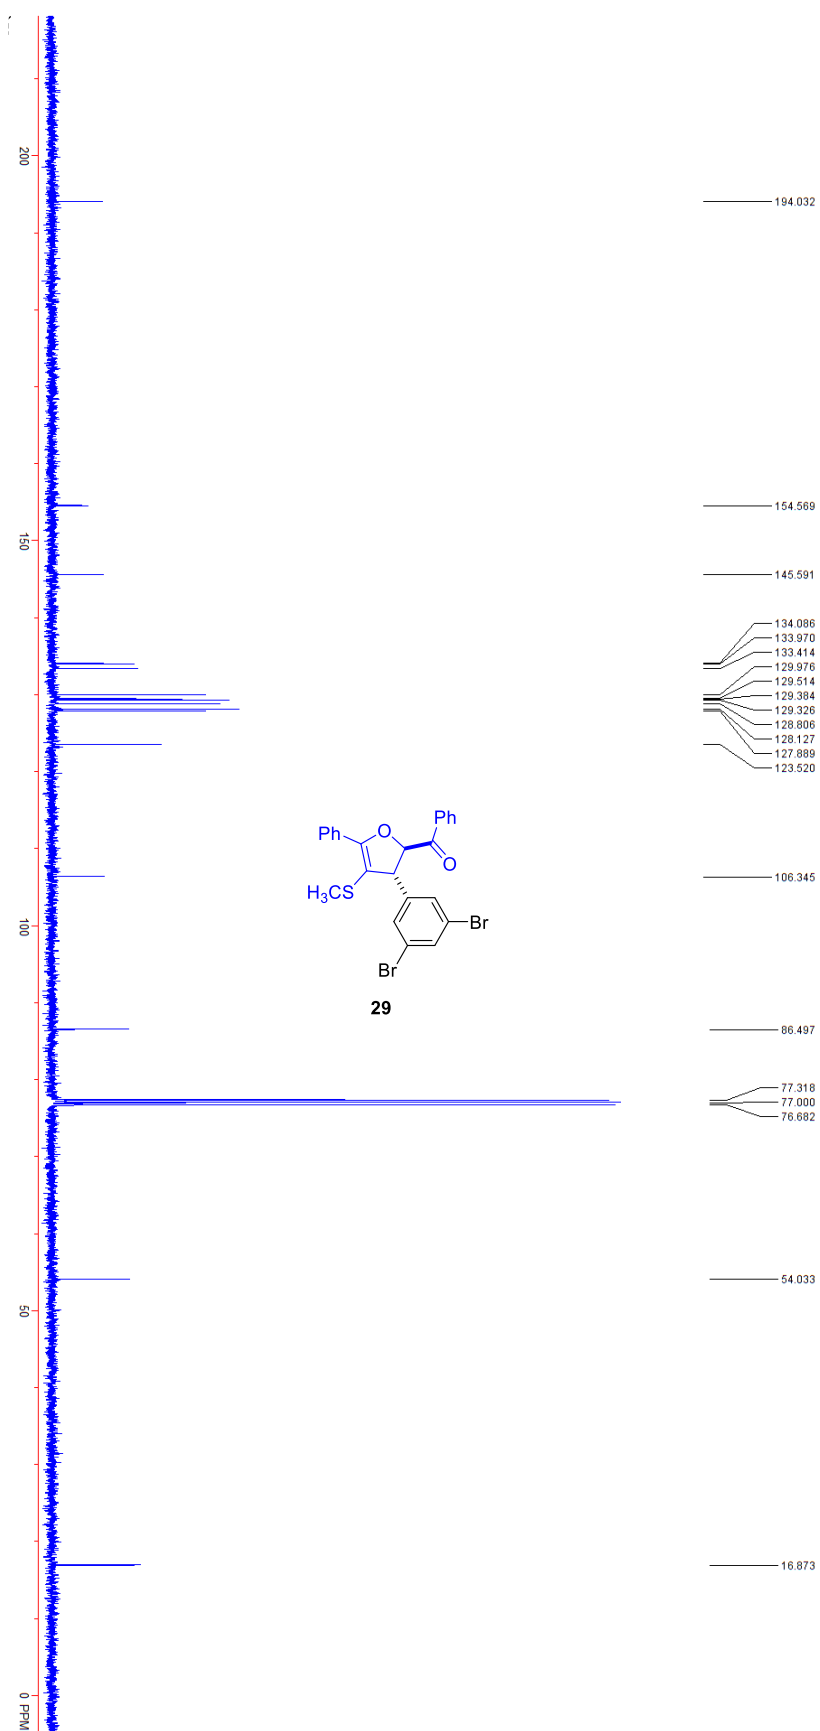

$^1\text{H}$  NMR spectrum of product **30** (400 MHz,  $\text{CDCl}_3$ )

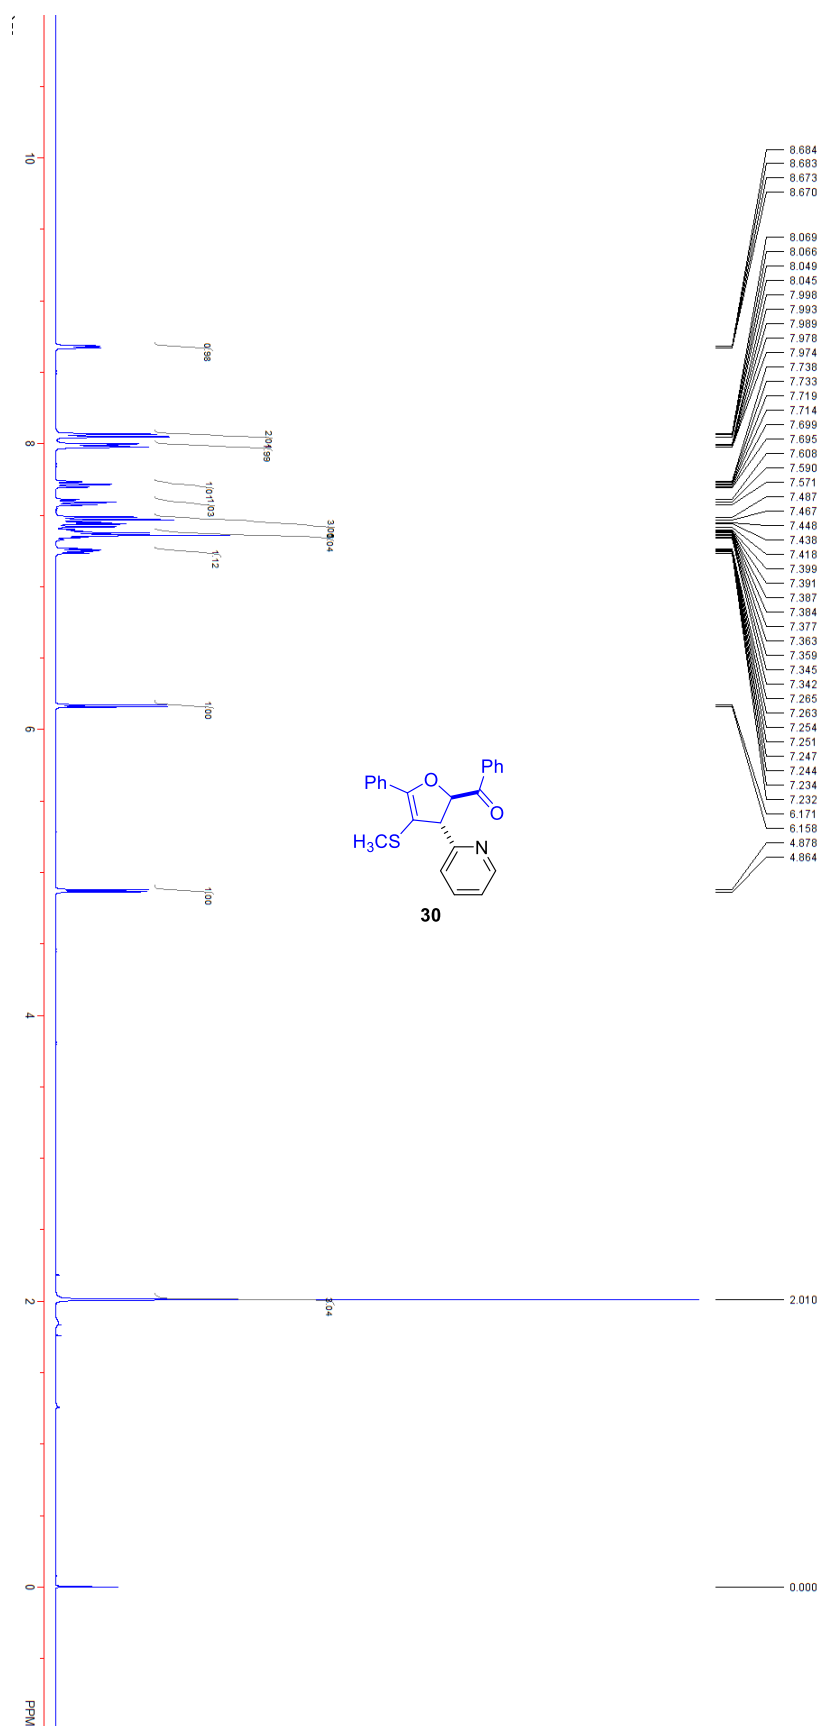

$^{13}\text{C}$  NMR spectrum of product **30** (100 MHz,  $\text{CDCl}_3$ )

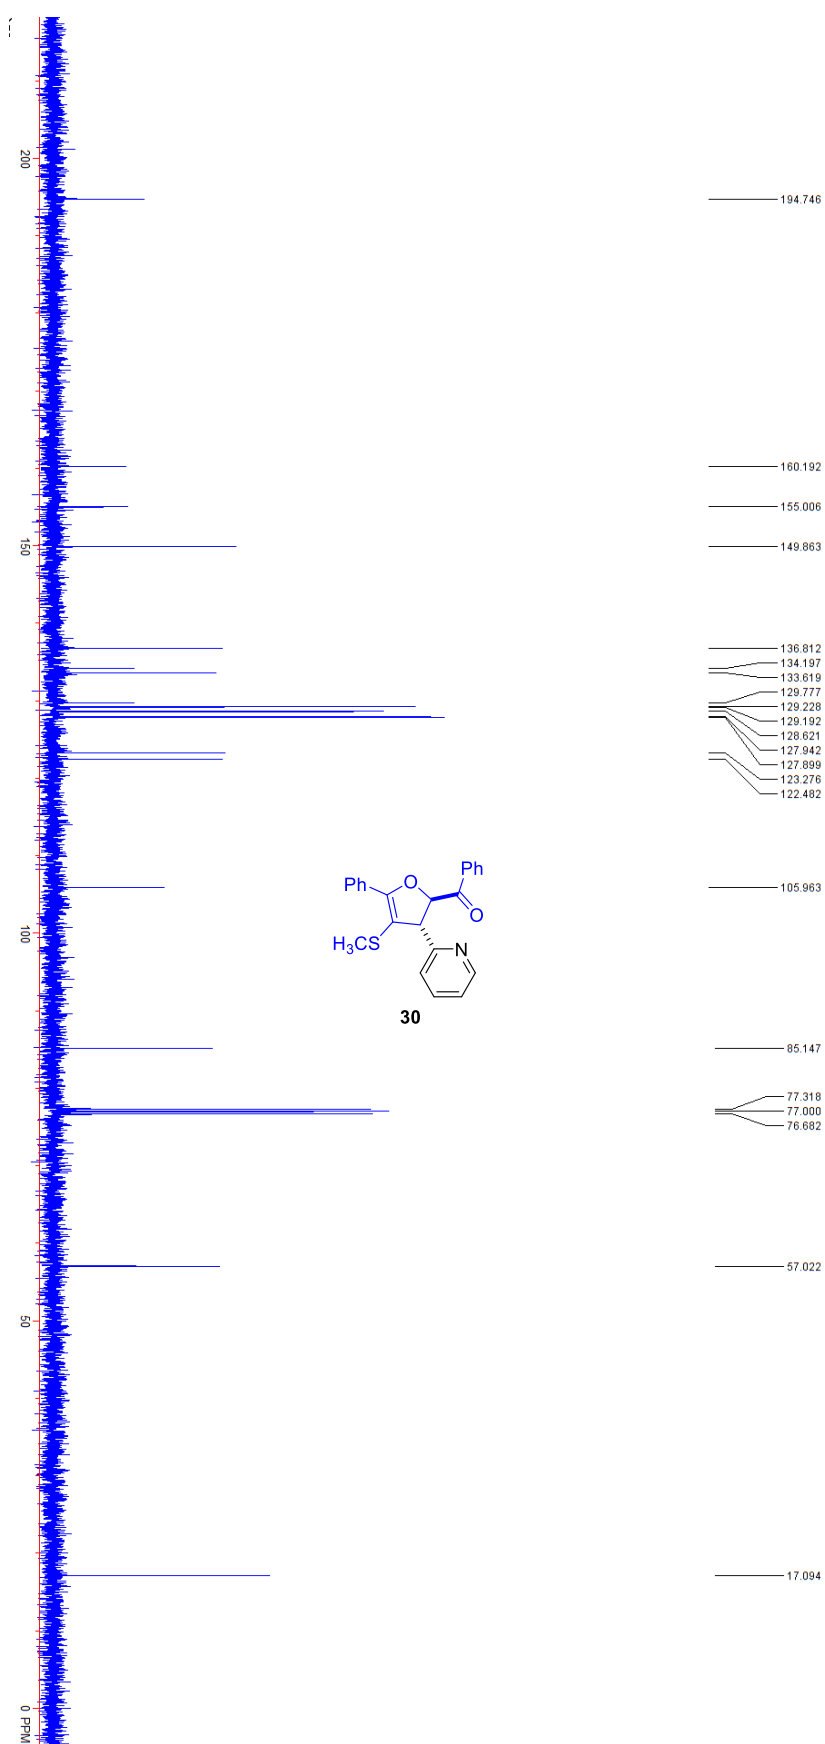

$^1\text{H}$  NMR spectrum of product **31** (400 MHz,  $\text{CDCl}_3$ )

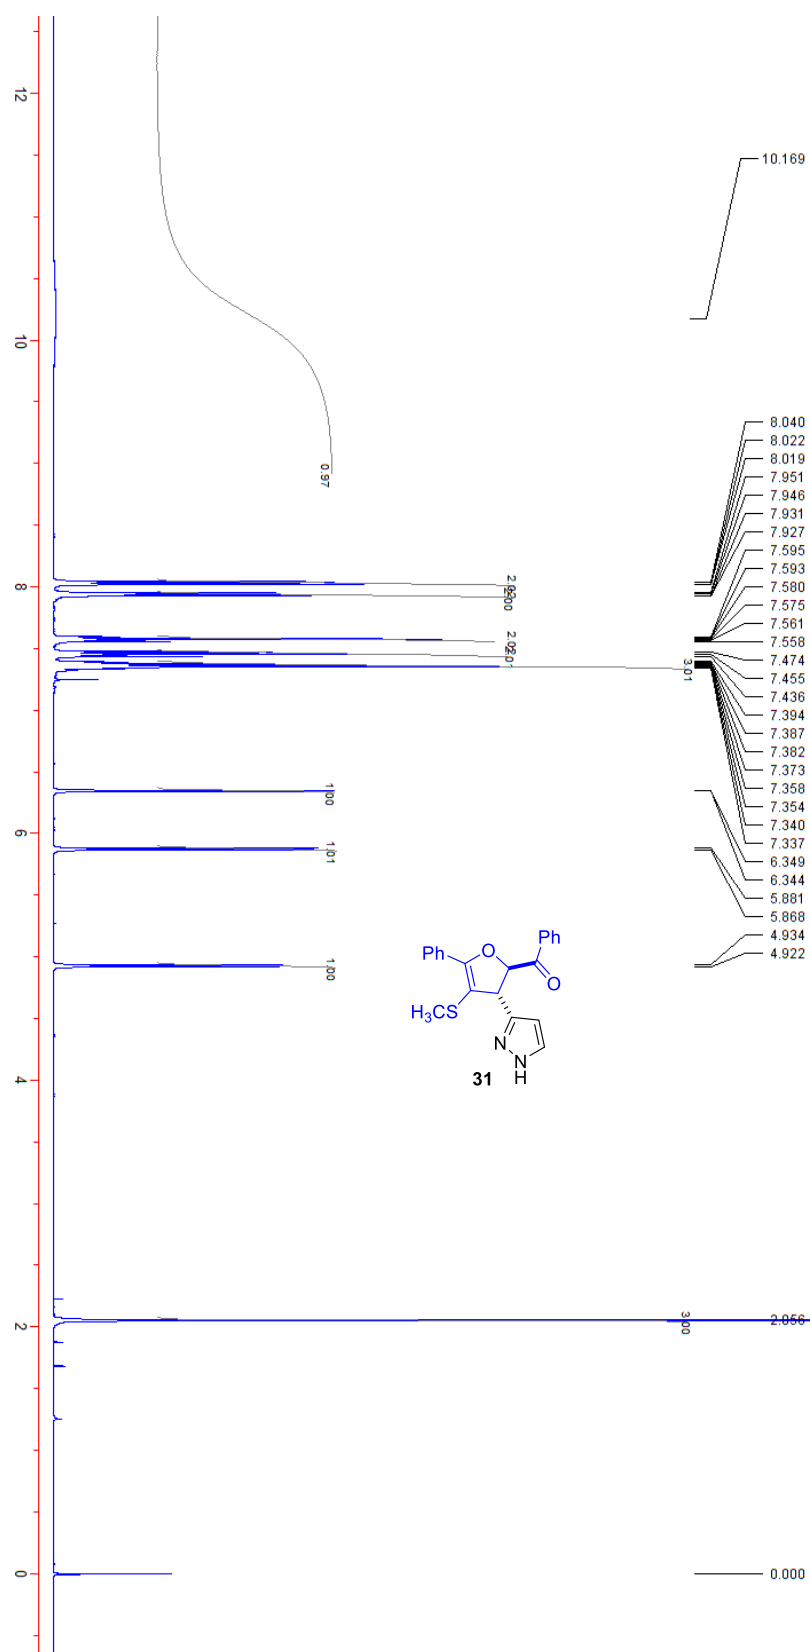

$^{13}\text{C}$  NMR spectrum of product **31** (100 MHz,  $\text{CDCl}_3$ )

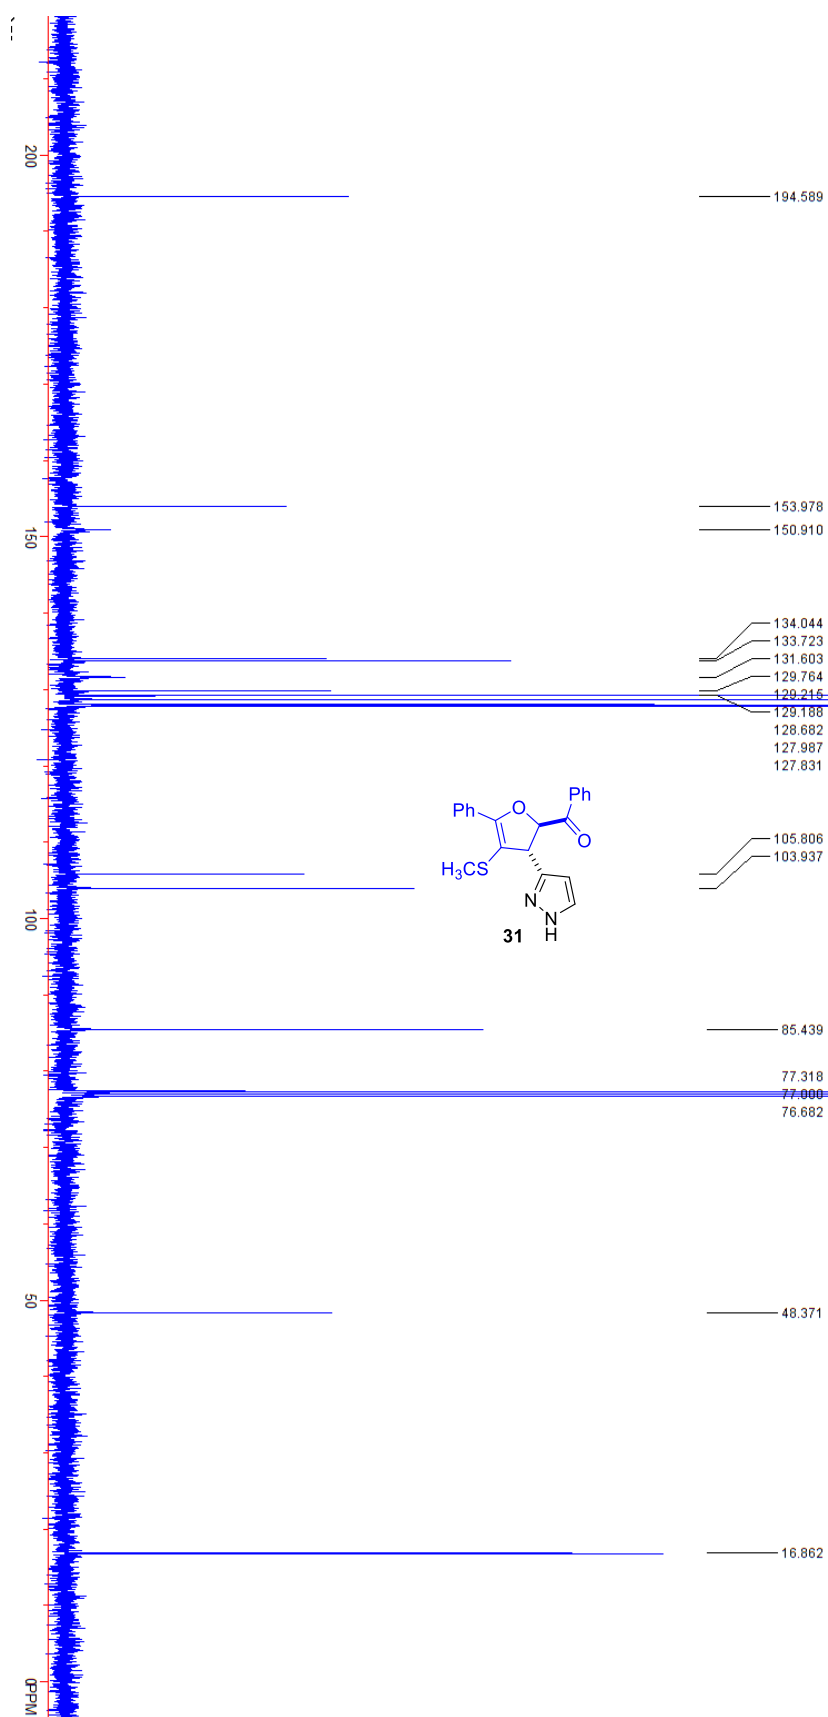

<sup>1</sup>H NMR spectrum of product **32** (400 MHz, CDCl<sub>3</sub>)

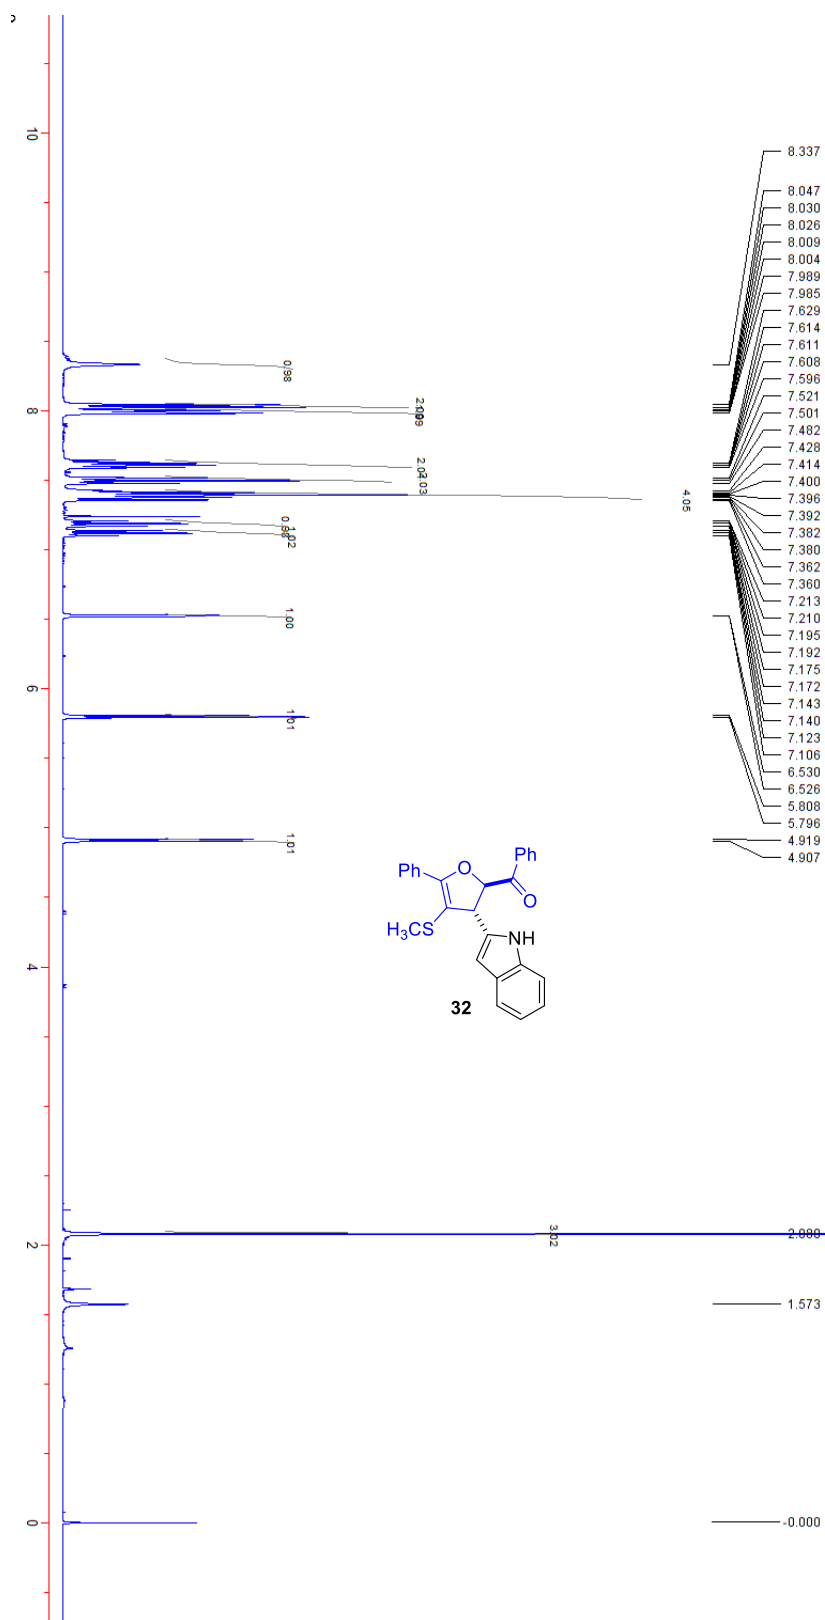

$^{13}\text{C}$  NMR spectrum of product **32** (100 MHz,  $\text{CDCl}_3$ )

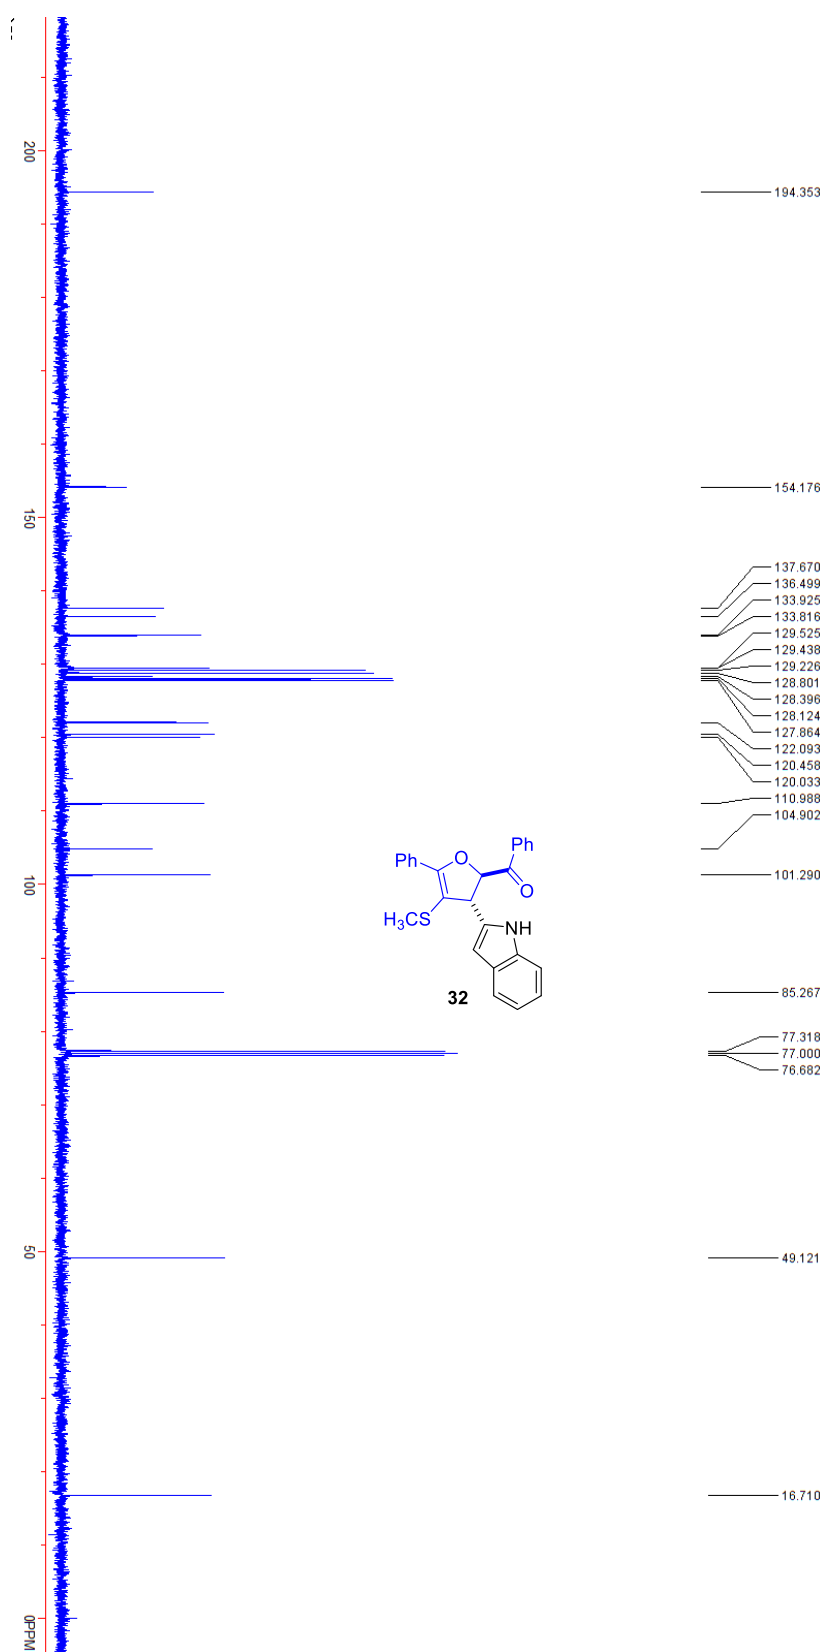



$^1\text{H}$  NMR spectrum of product **33** (400 MHz,  $\text{CDCl}_3$ )

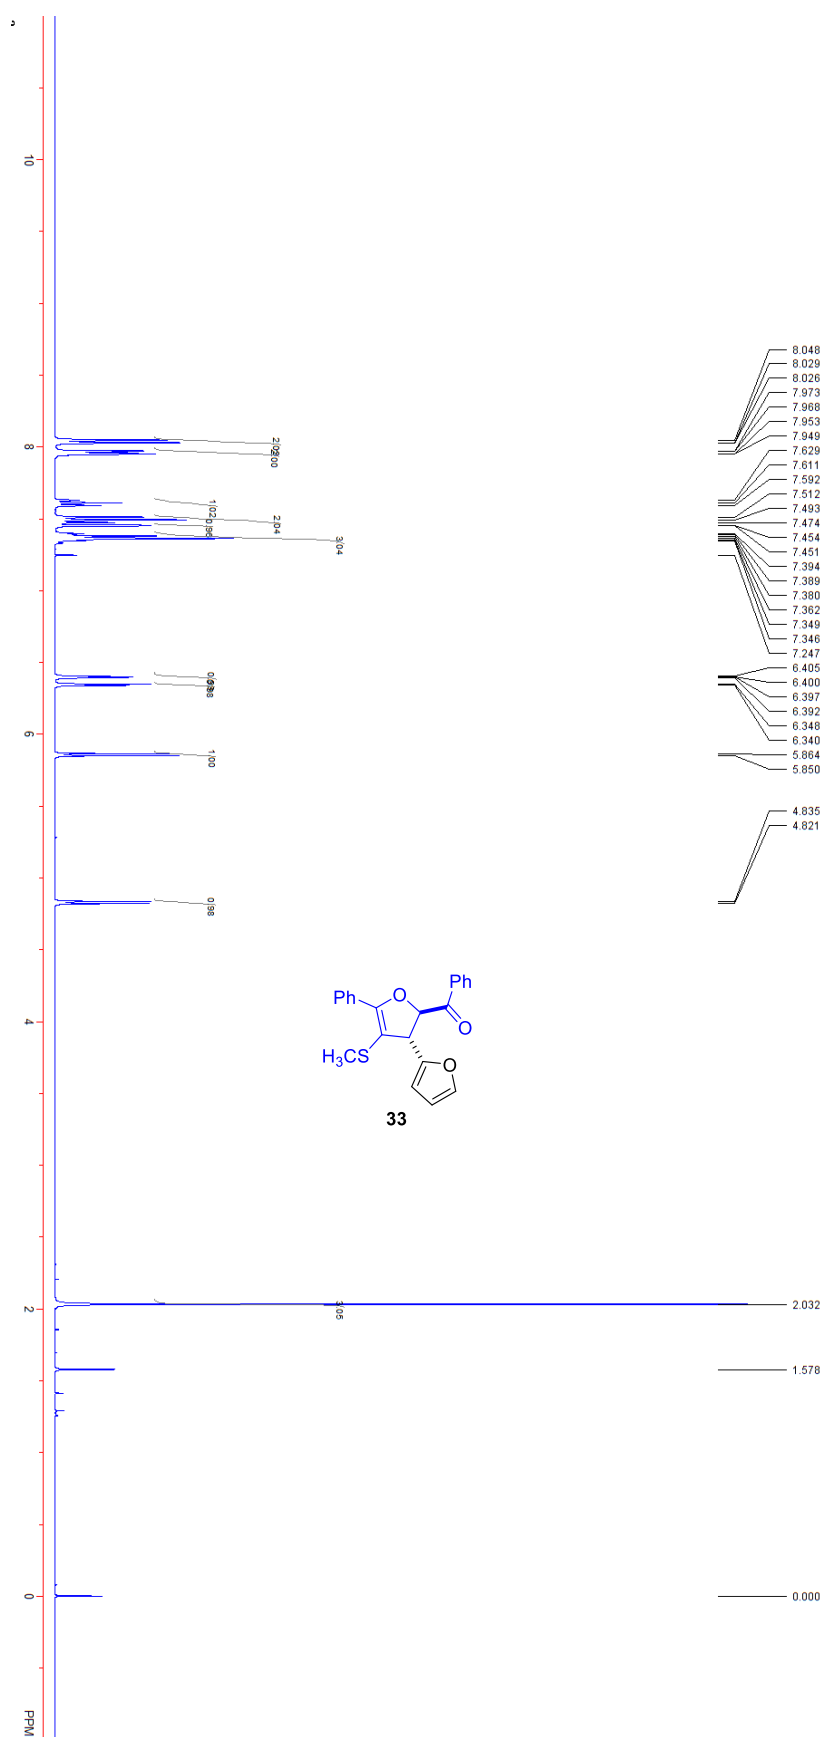

$^{13}\text{C}$  NMR spectrum of product **33** (100 MHz,  $\text{CDCl}_3$ )

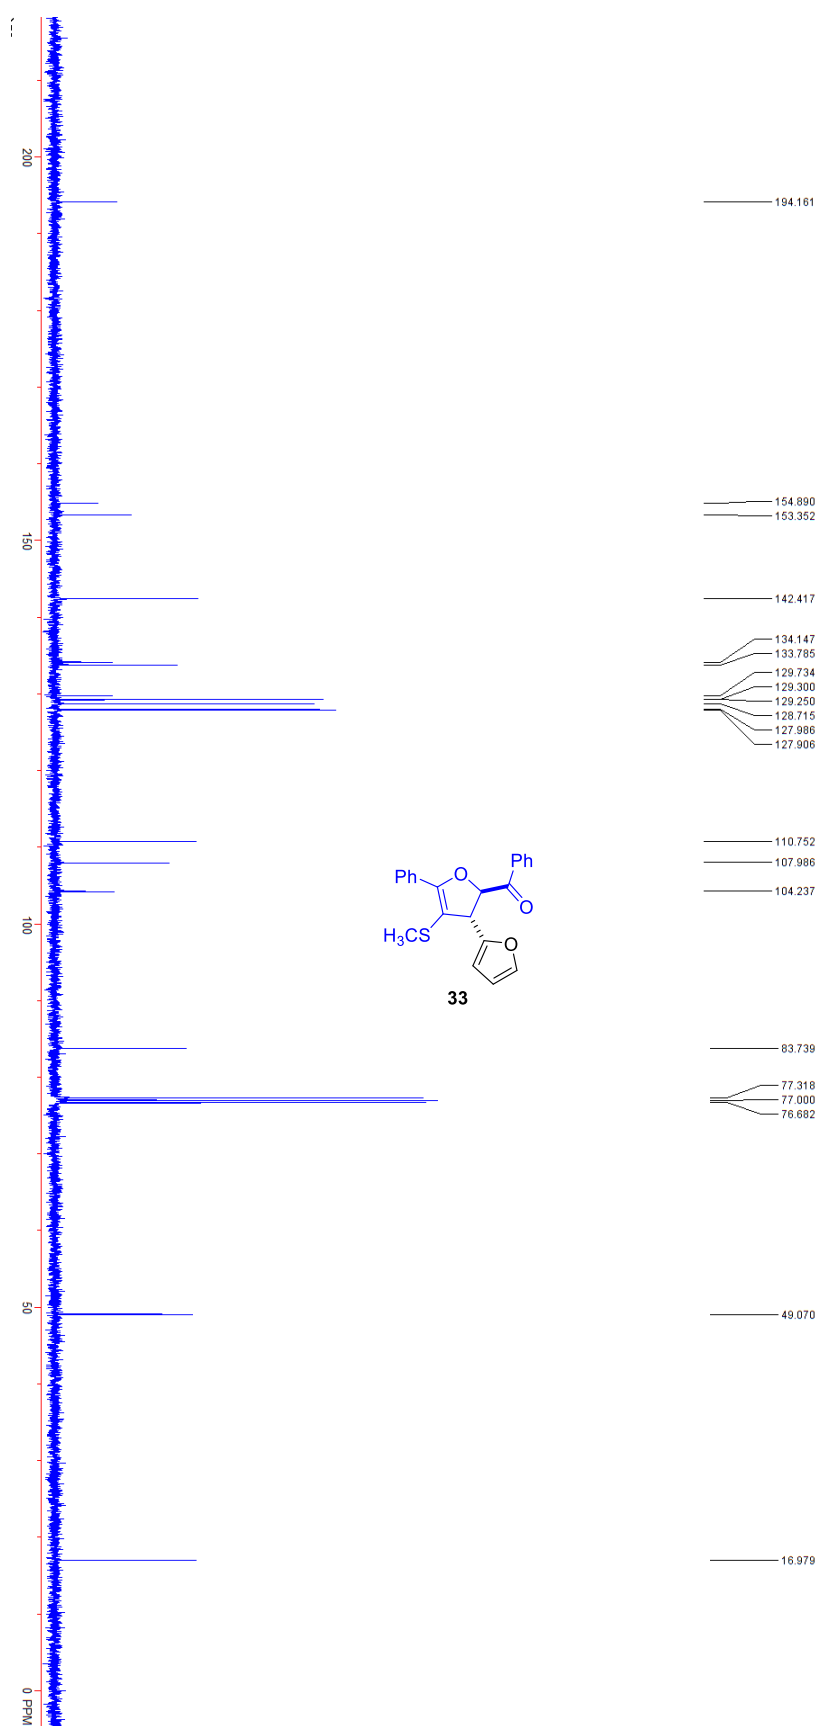

$^1\text{H}$  NMR spectrum of product **34** (400 MHz,  $\text{CDCl}_3$ )

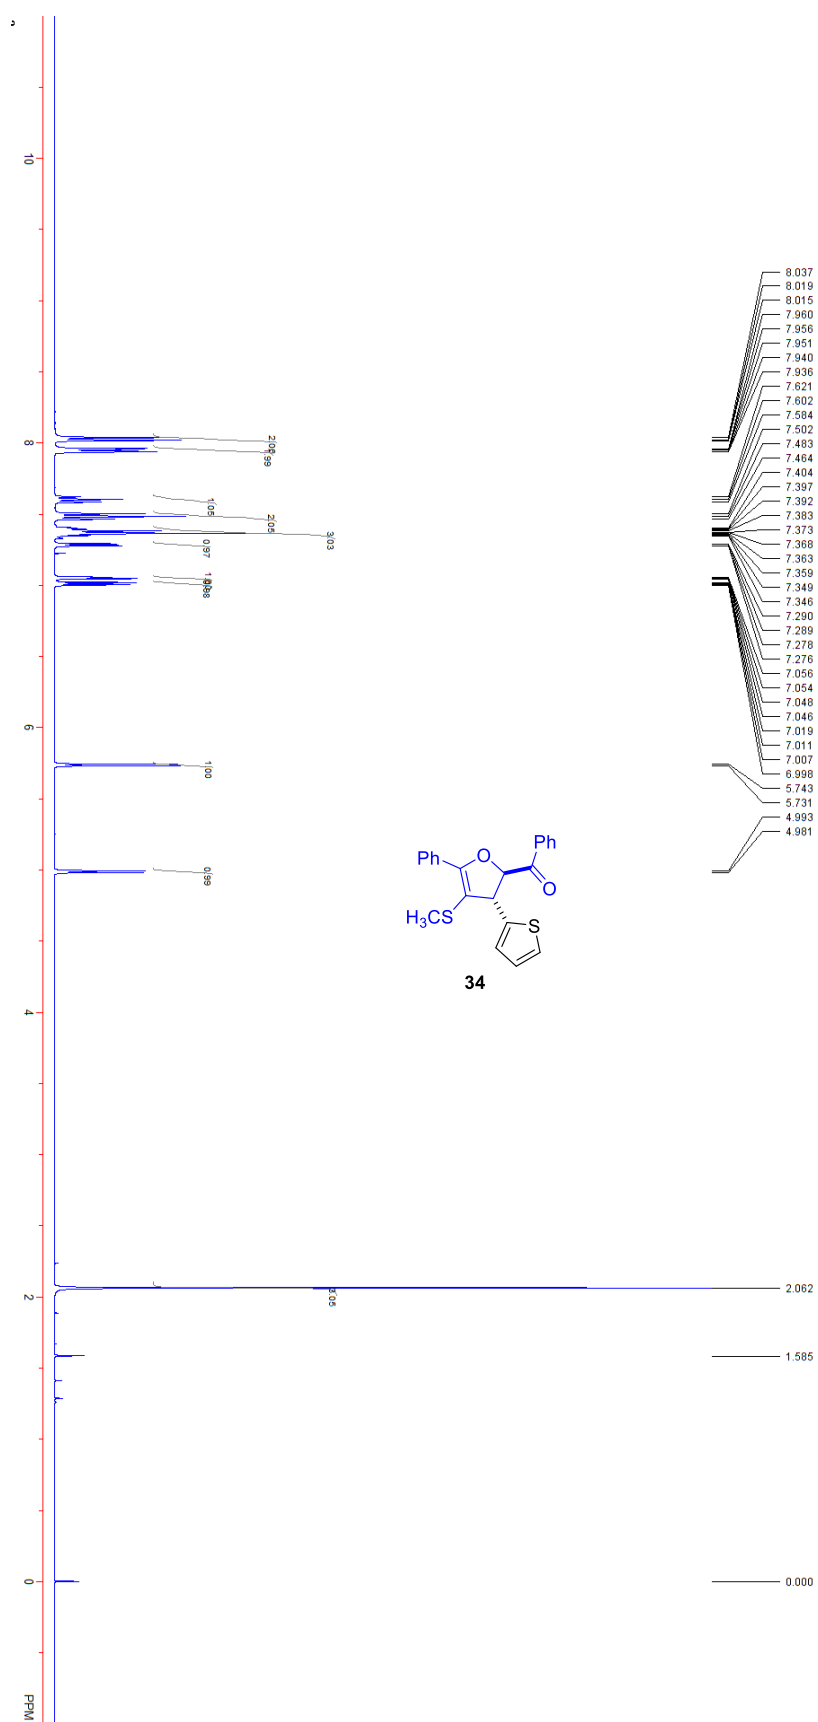

$^{13}\text{C}$  NMR spectrum of product **34** (100 MHz,  $\text{CDCl}_3$ )

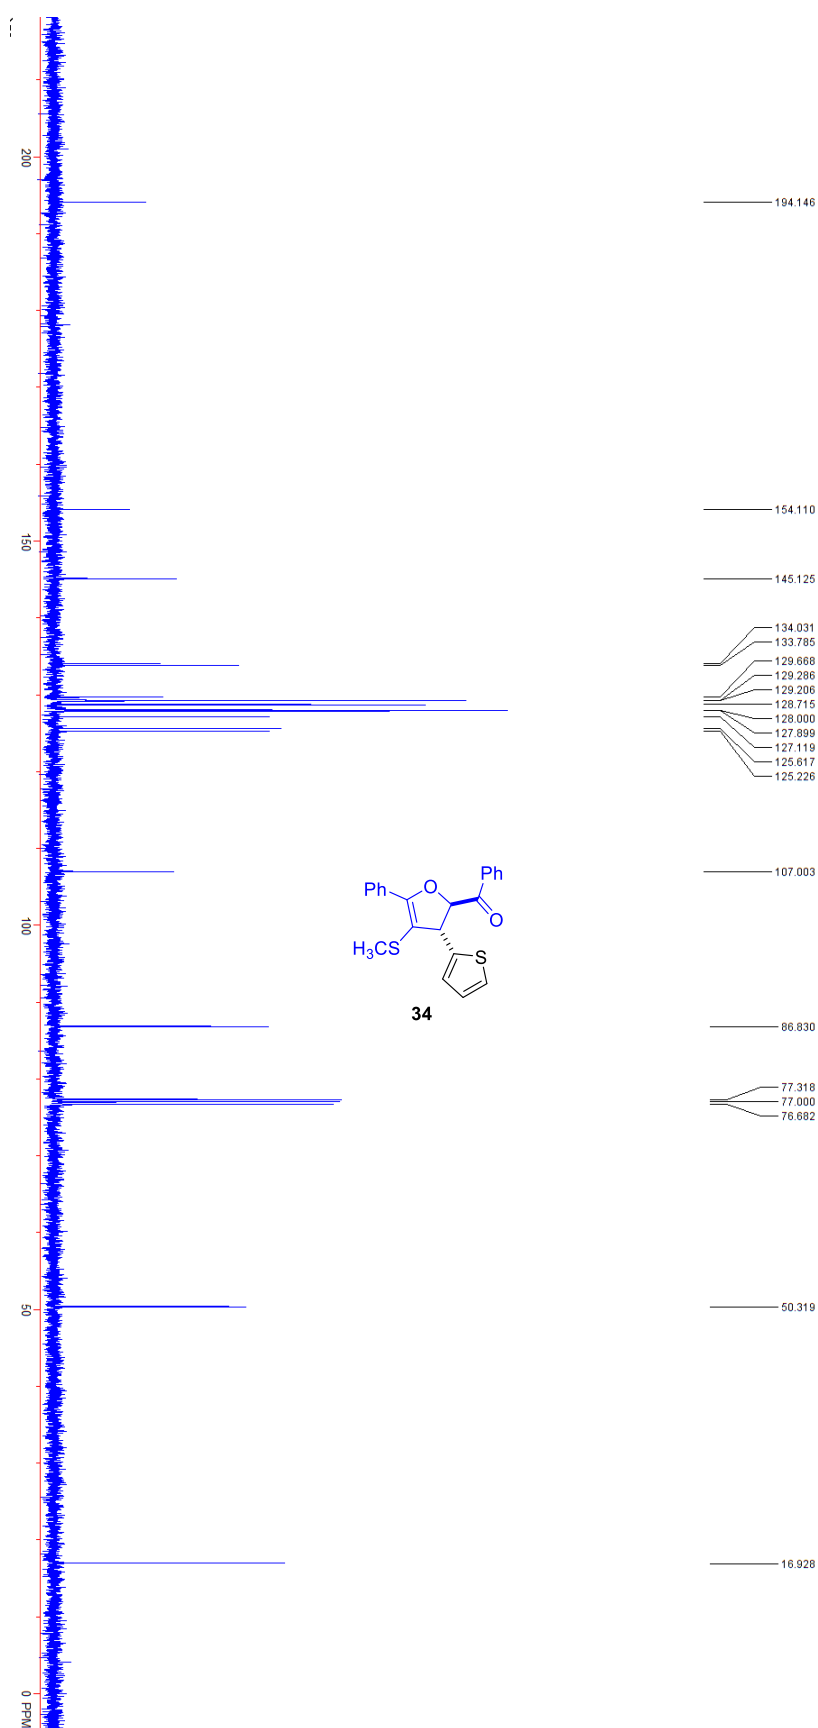

$^1\text{H}$  NMR spectrum of product **35** (400 MHz,  $\text{CDCl}_3$ )

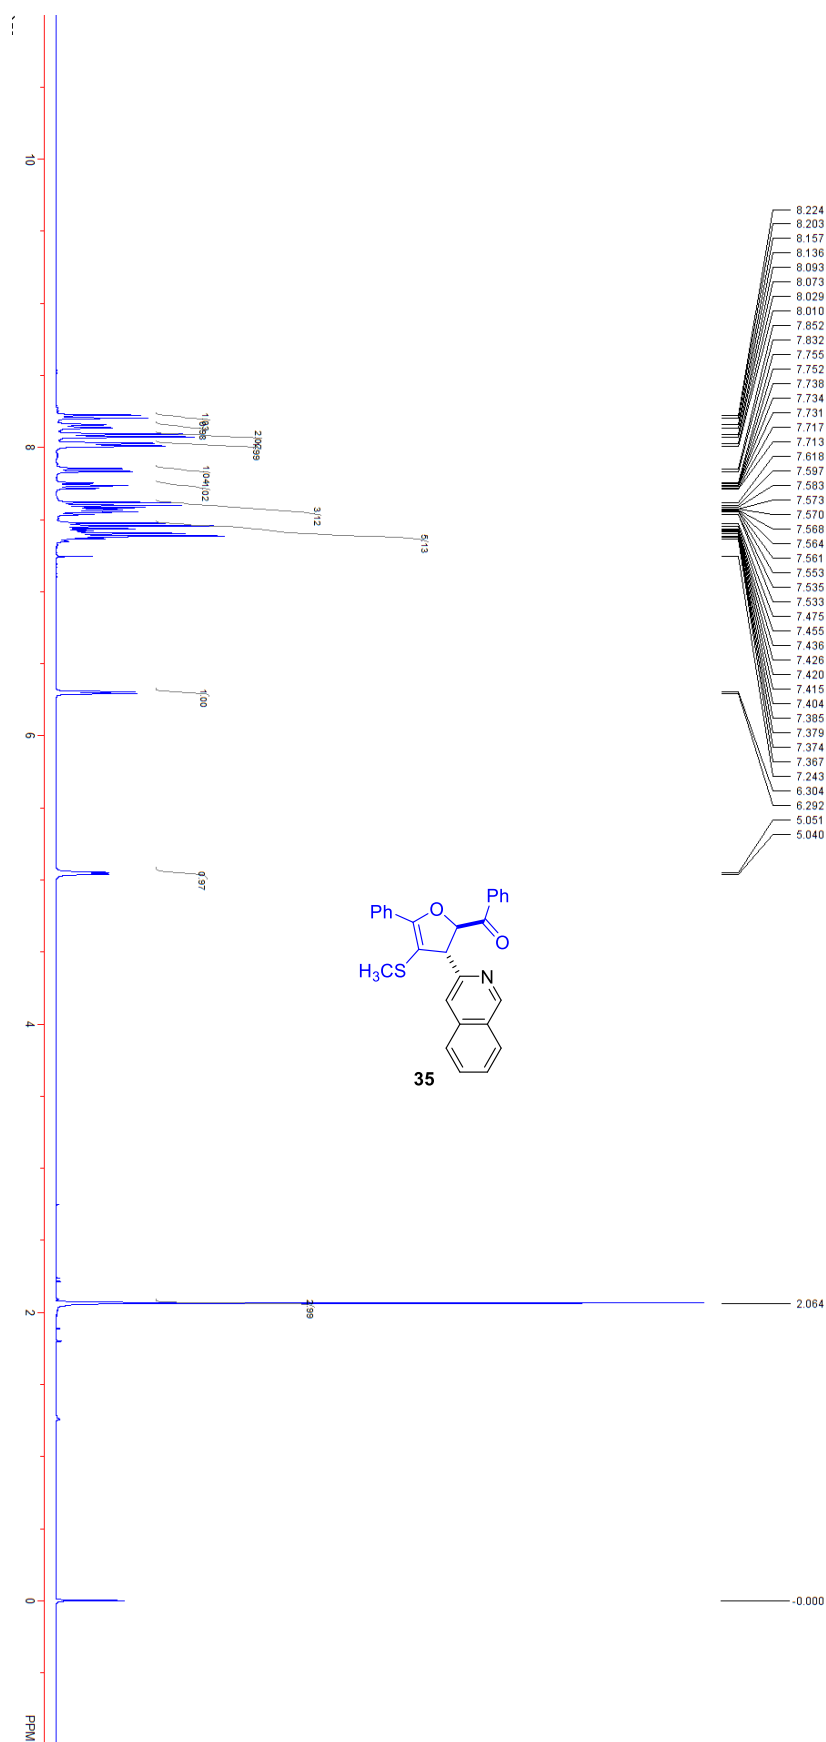

$^{13}\text{C}$  NMR spectrum of product **35** (100 MHz,  $\text{CDCl}_3$ )

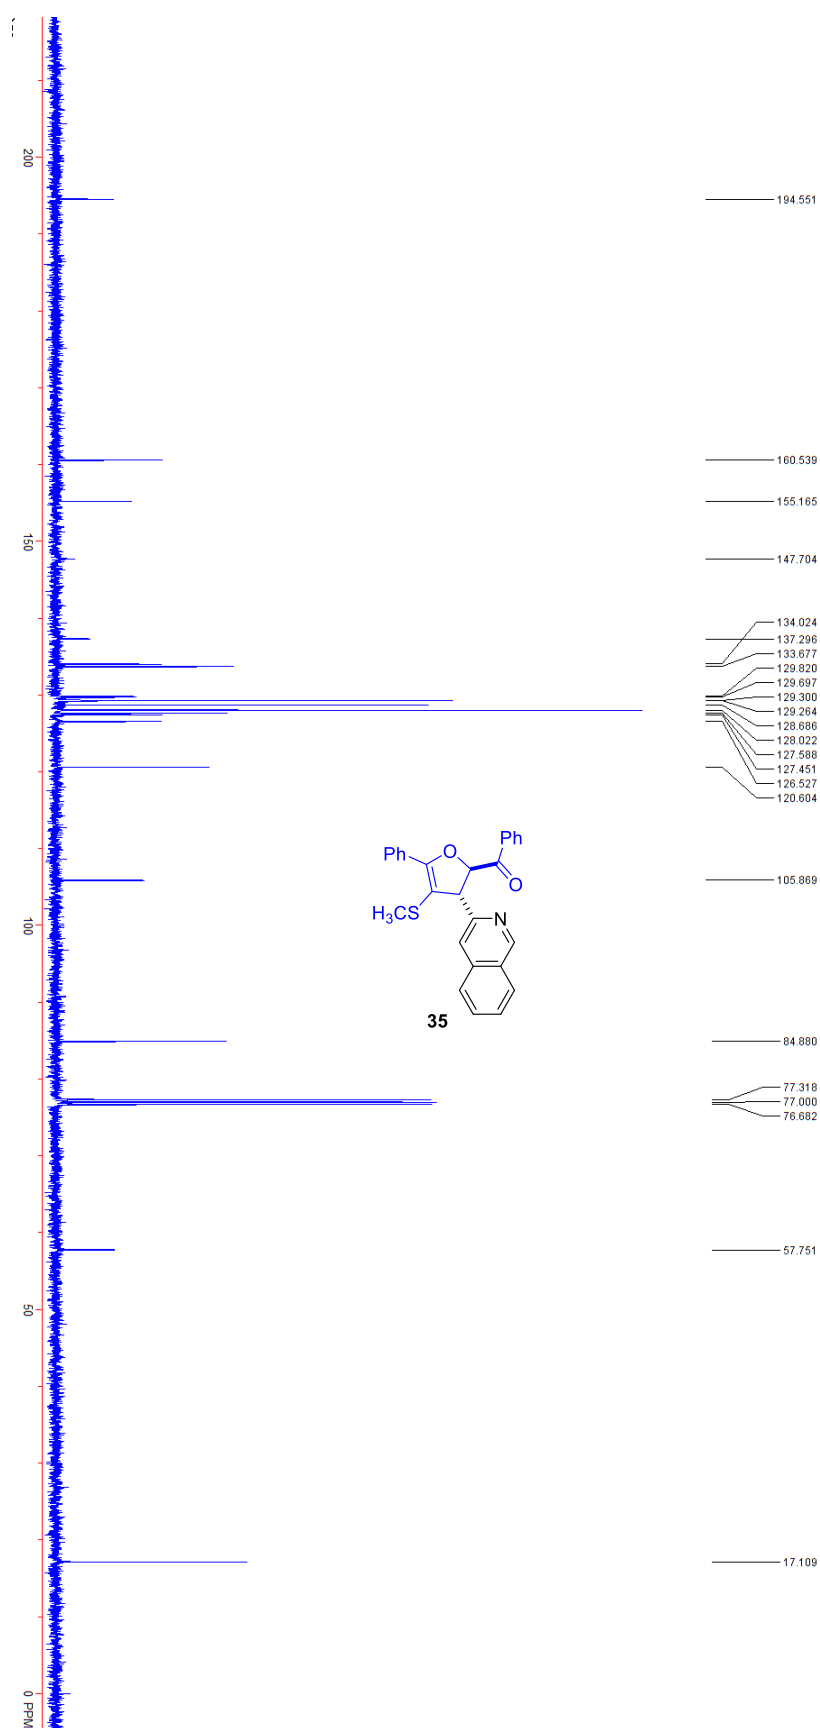

$^1\text{H}$  NMR spectrum of product **36** (400 MHz,  $\text{CDCl}_3$ )

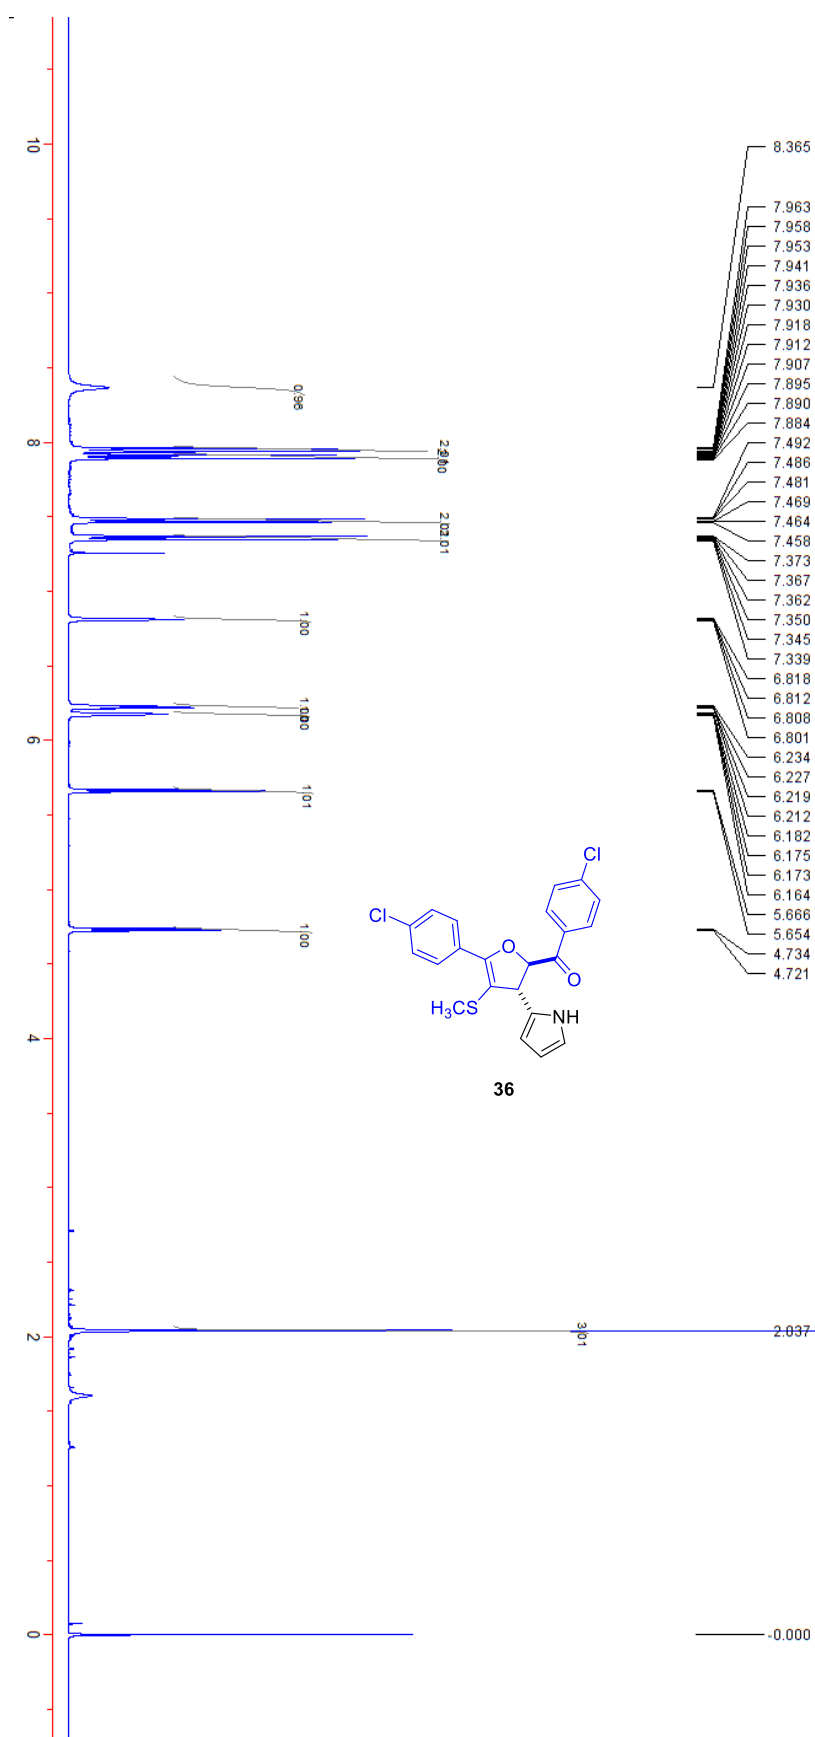

$^{13}\text{C}$  NMR spectrum of product **36** (100 MHz,  $\text{CDCl}_3$ )

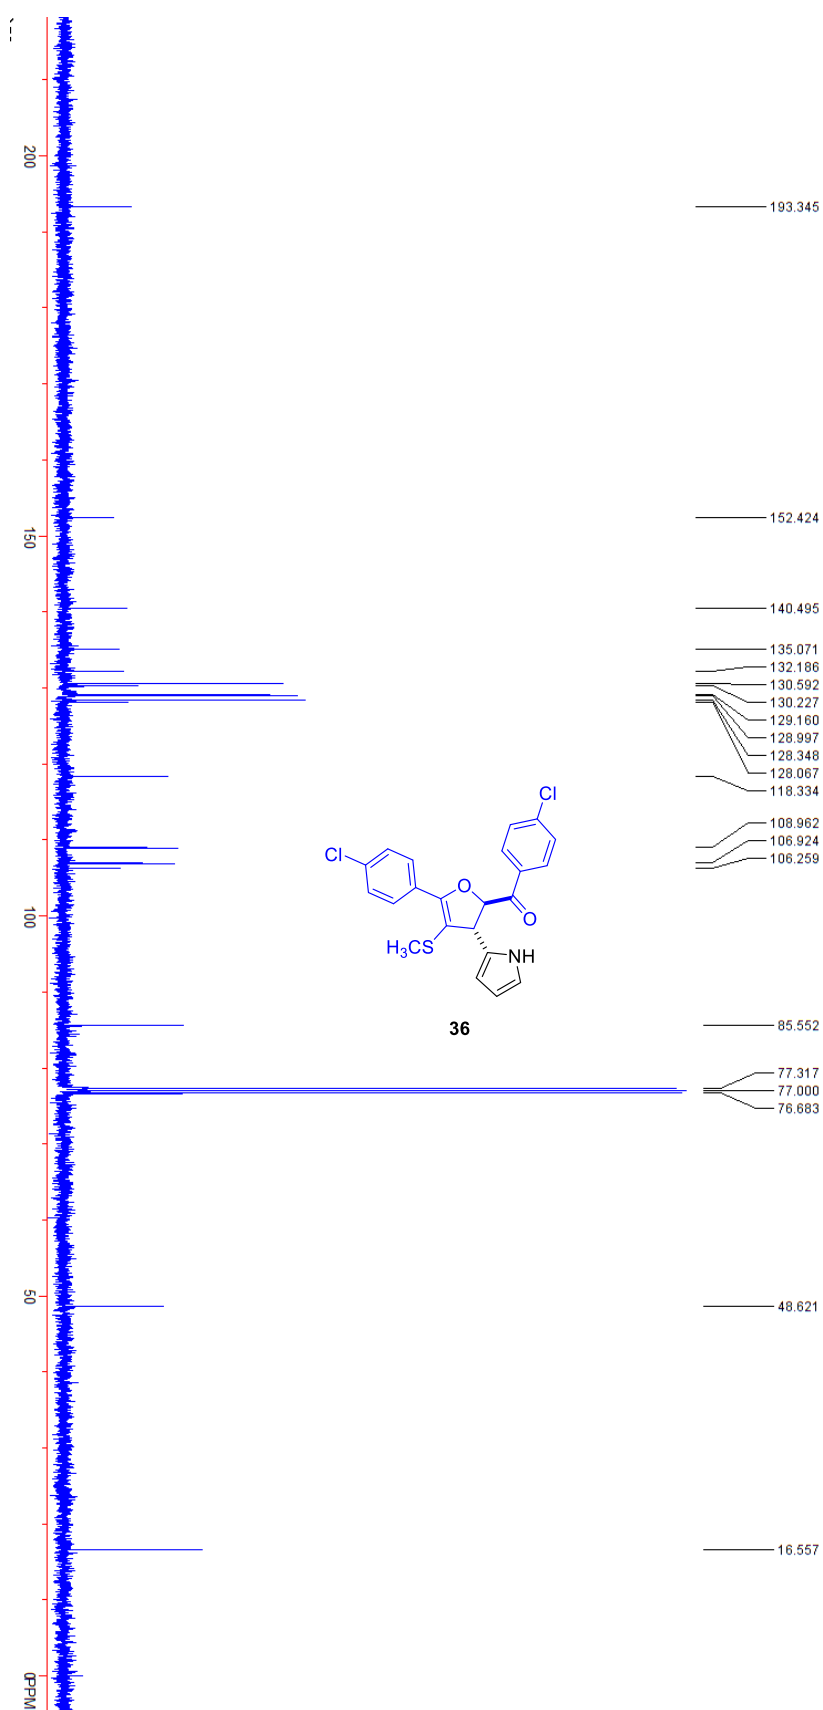



$^1\text{H}$  NMR spectrum of product **37** (400 MHz,  $\text{CDCl}_3$ )

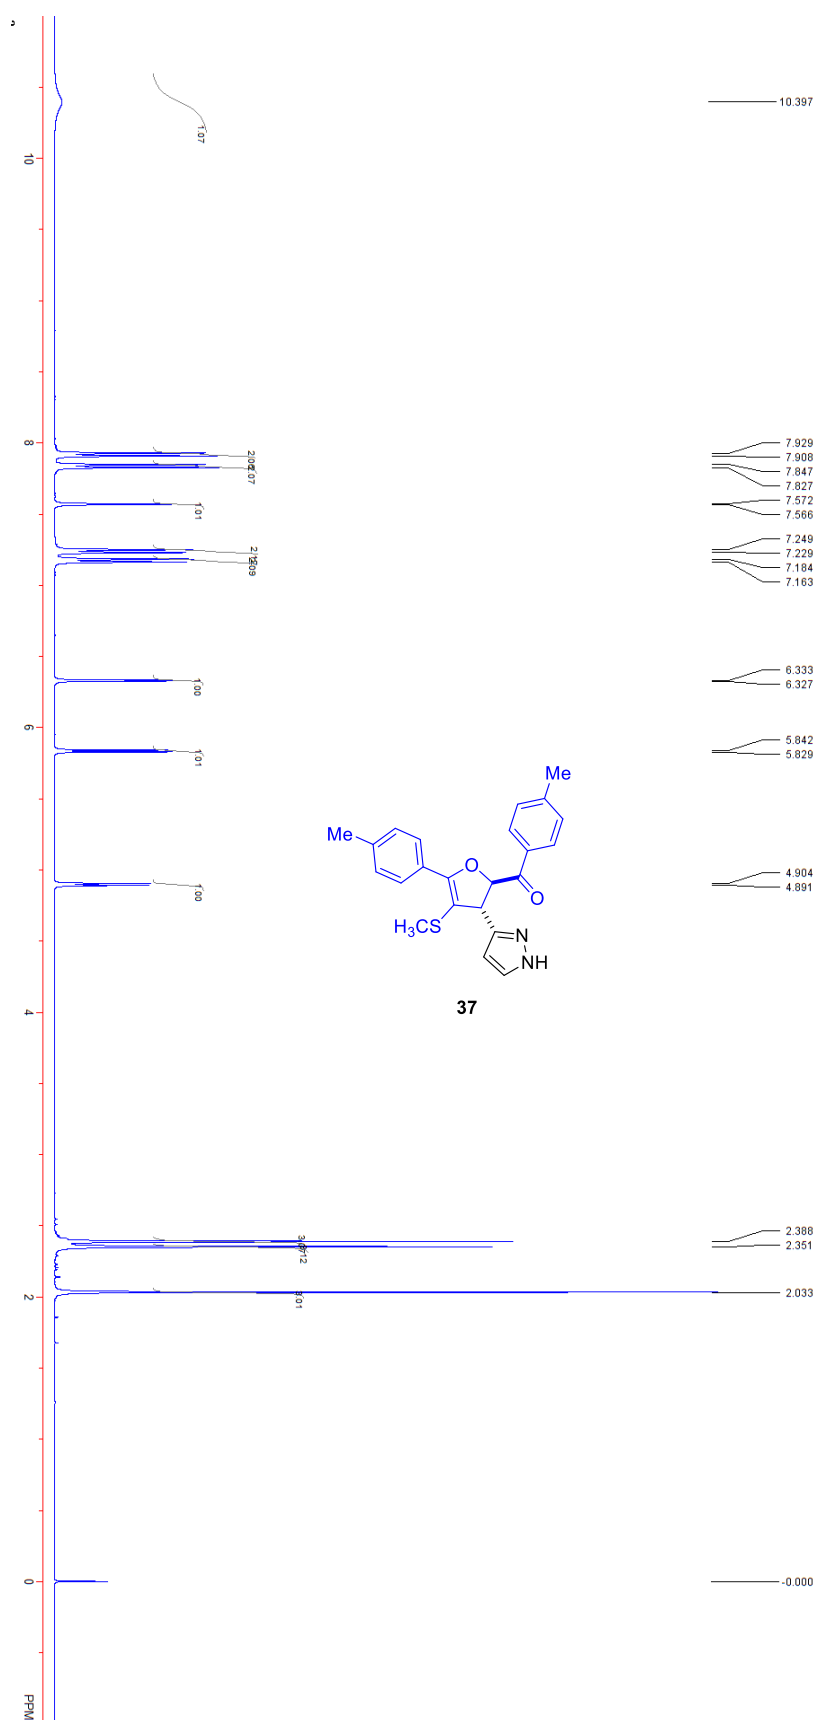

$^{13}\text{C}$  NMR spectrum of product **37** (100 MHz,  $\text{CDCl}_3$ )

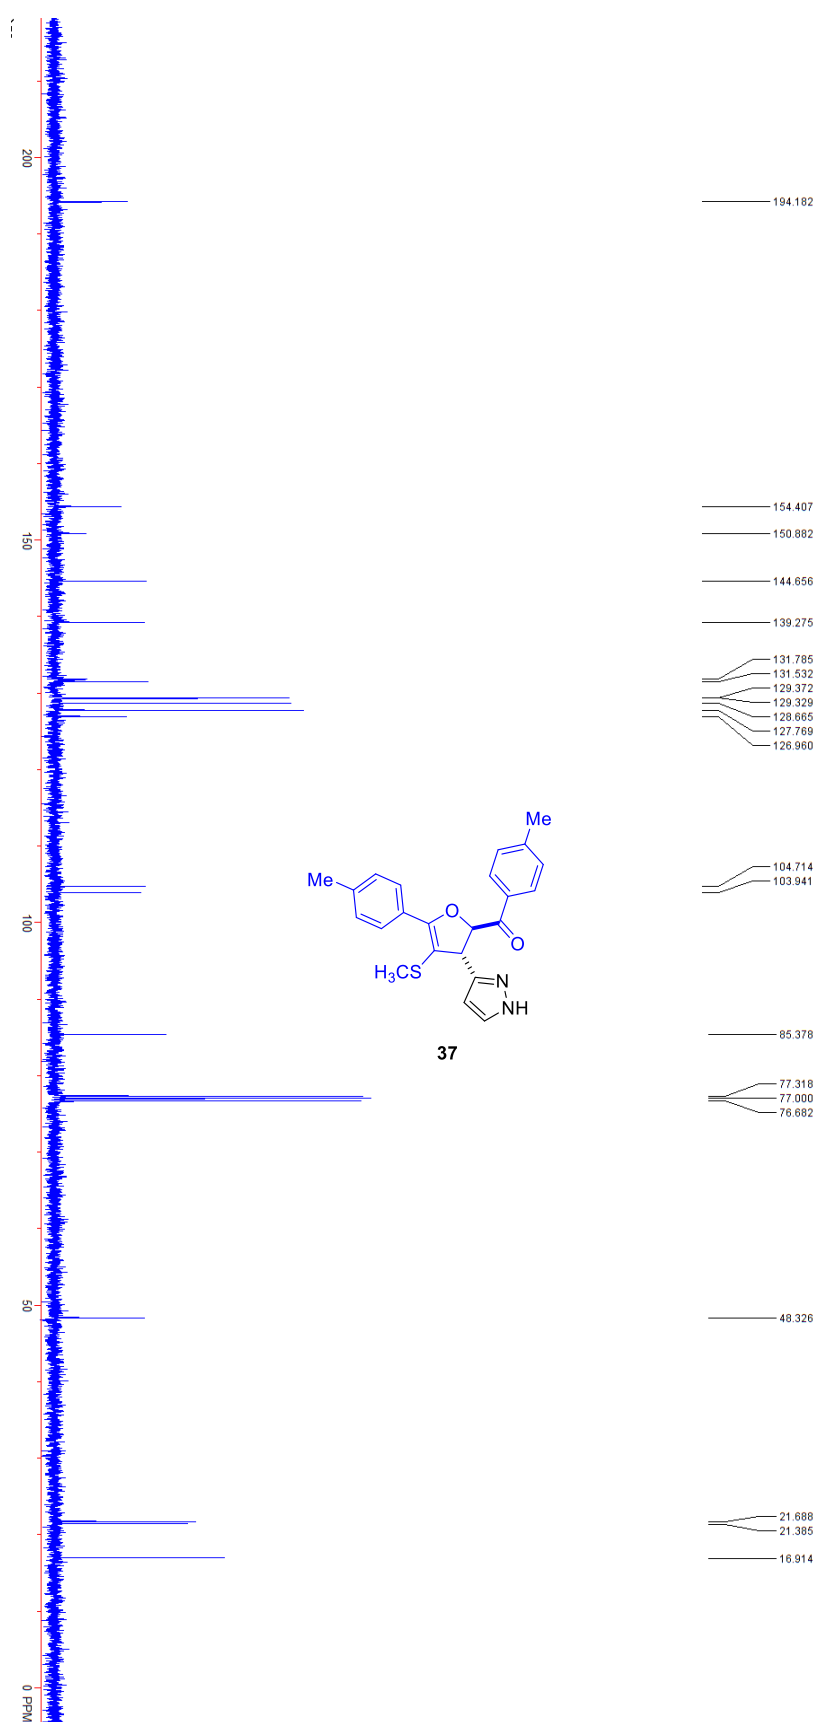

$^1\text{H}$  NMR spectrum of product **38** (400 MHz,  $\text{CDCl}_3$ )

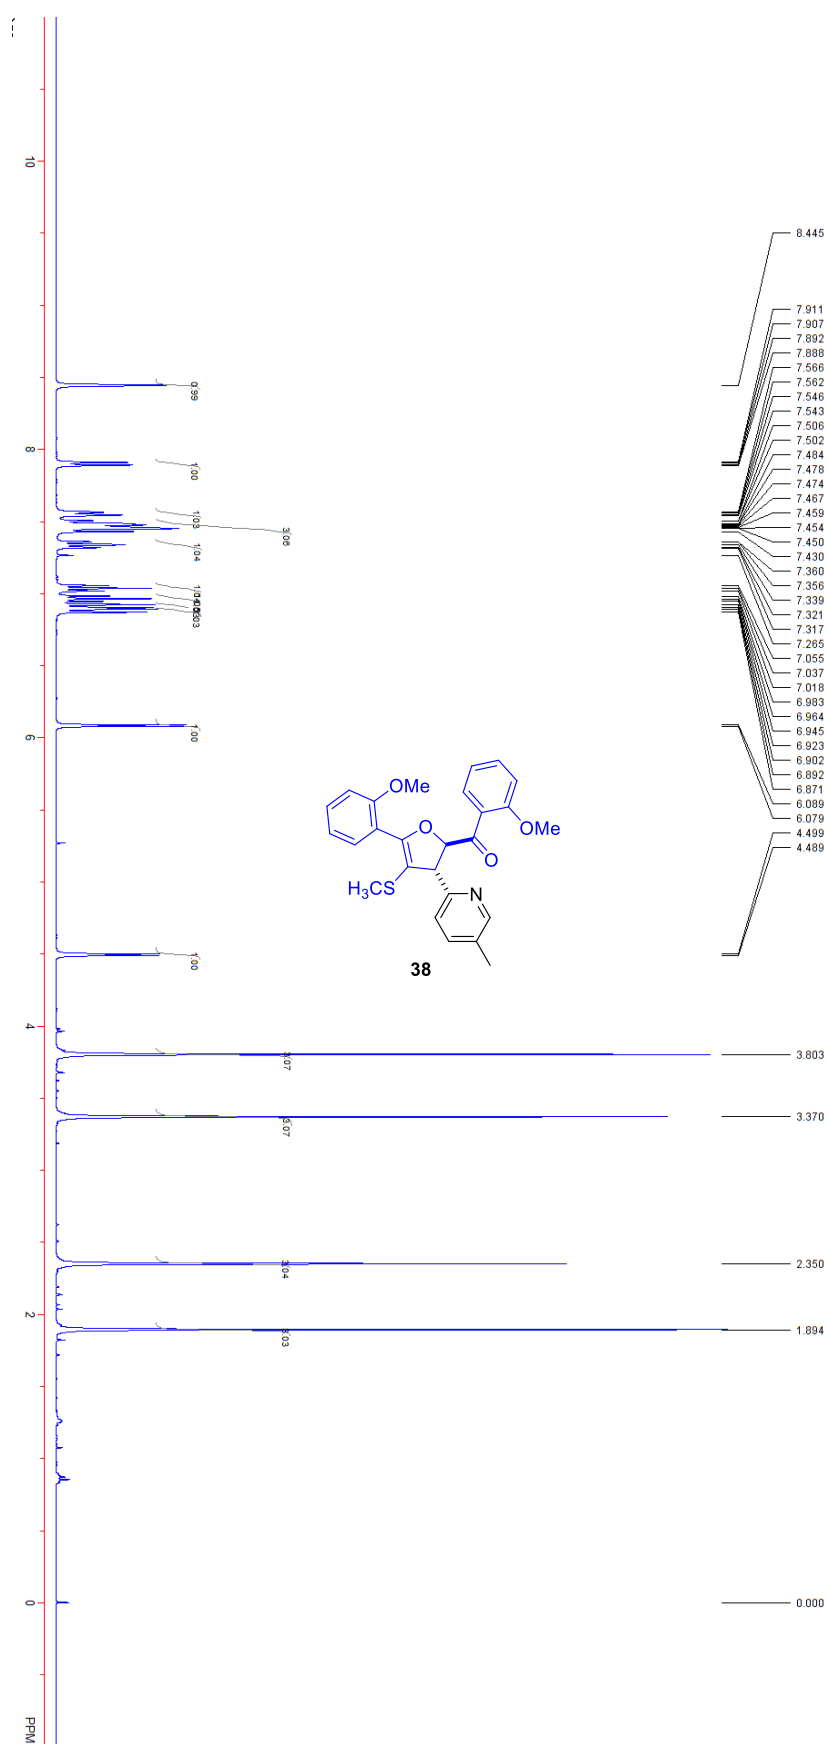

$^{13}\text{C}$  NMR spectrum of product **38** (100 MHz,  $\text{CDCl}_3$ )

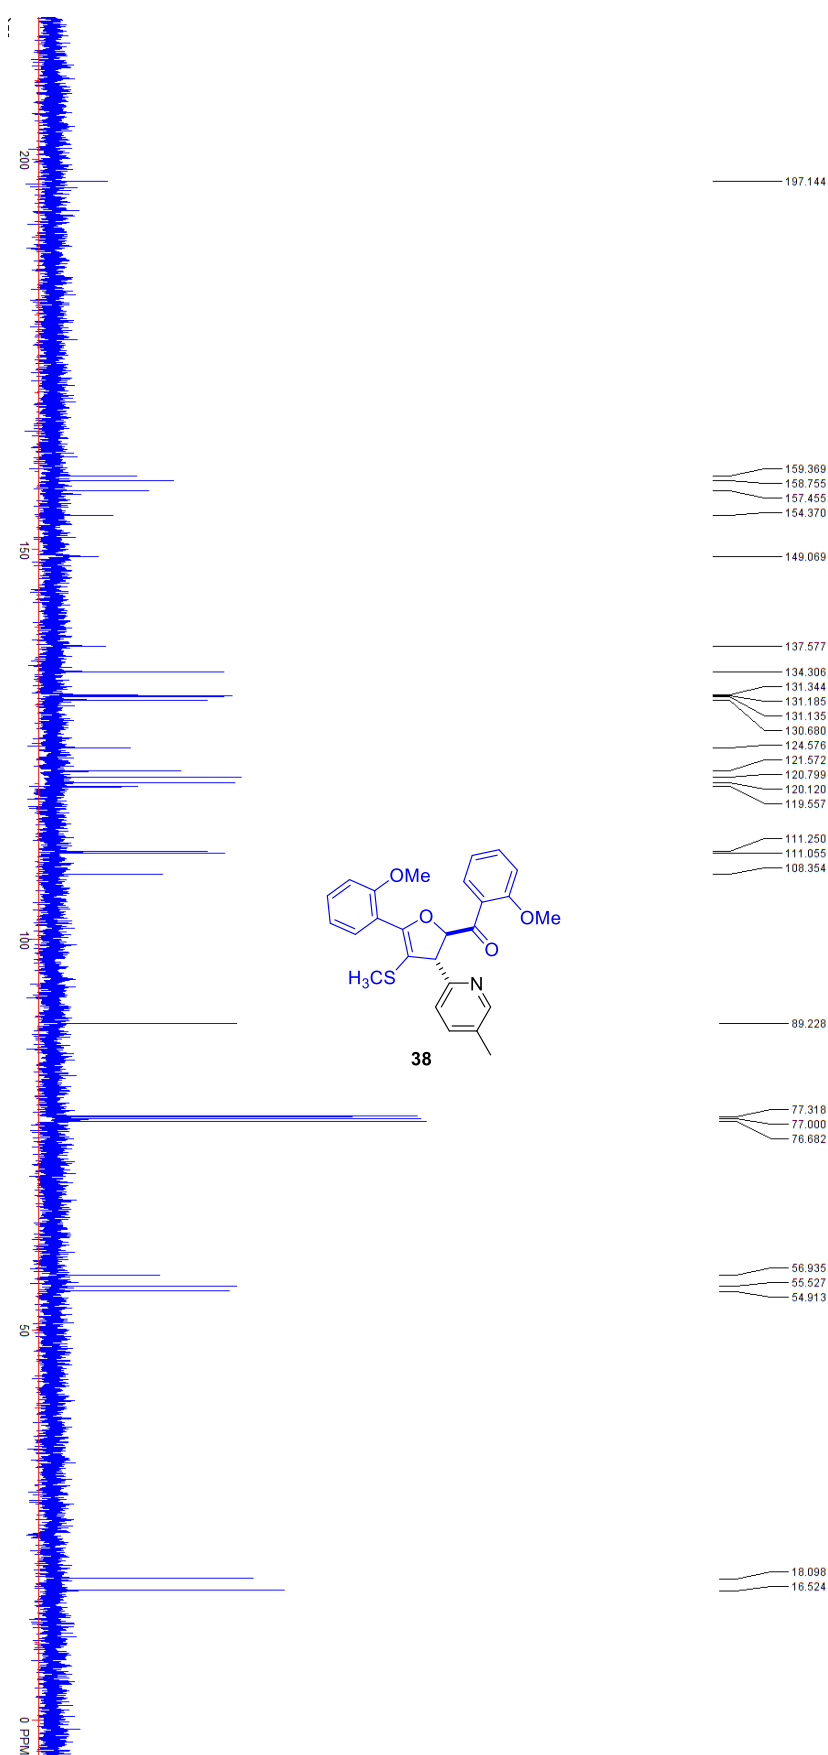

$^1\text{H}$  NMR spectrum of product **39** (400 MHz,  $\text{CDCl}_3$ )

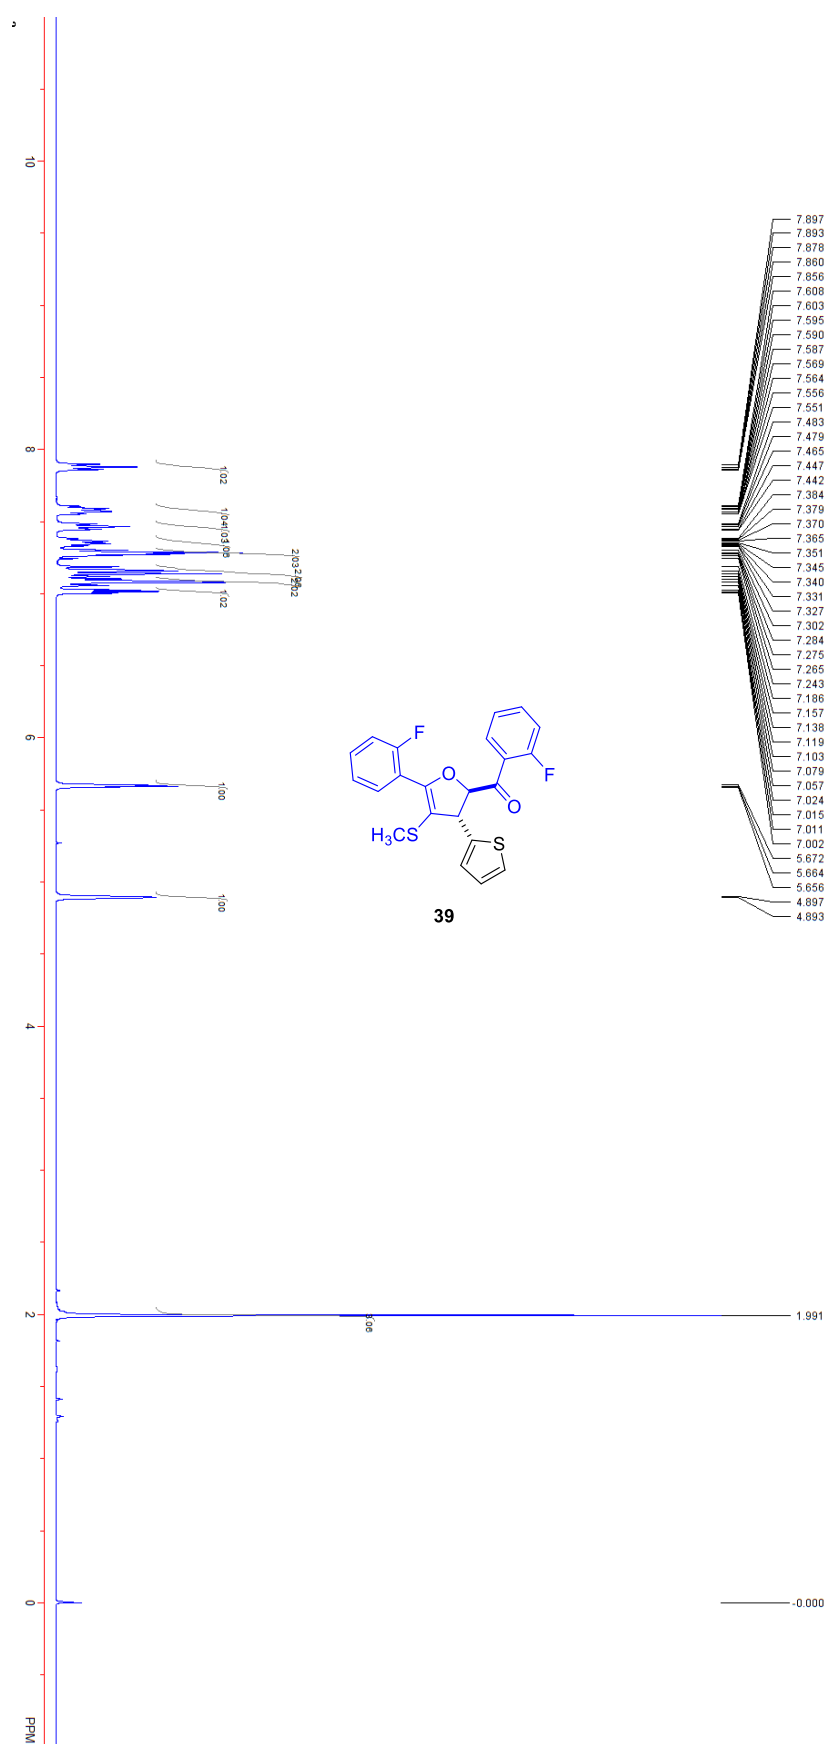

$^{13}\text{C}$  NMR spectrum of product **39** (100 MHz,  $\text{CDCl}_3$ )

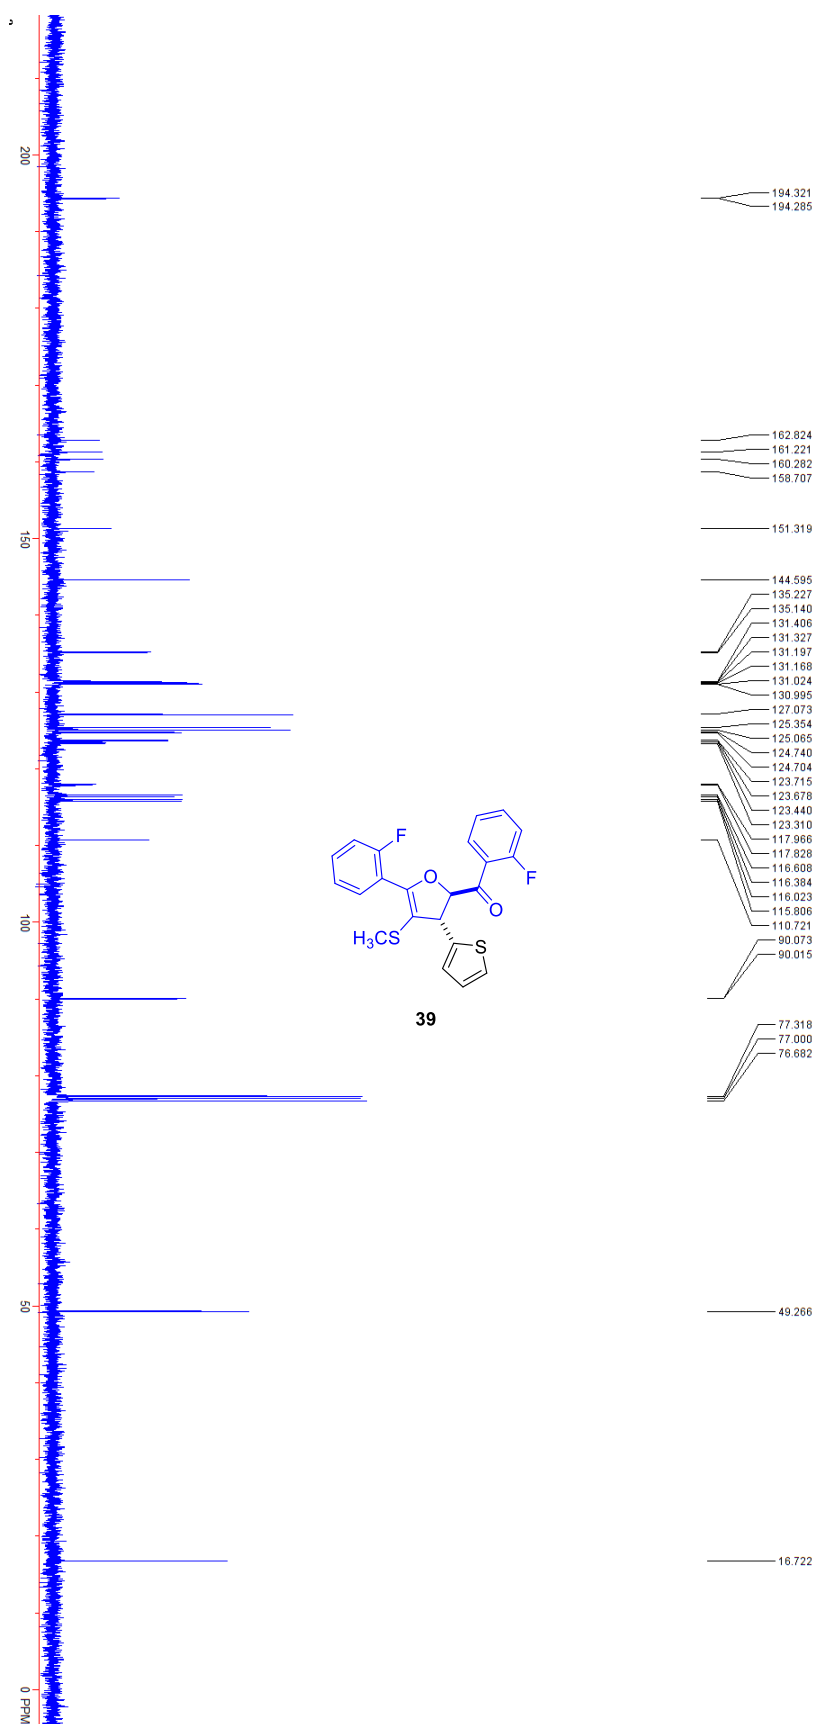

$^{19}\text{F}$  NMR spectrum of product **39** (376 MHz,  $\text{CDCl}_3$ )

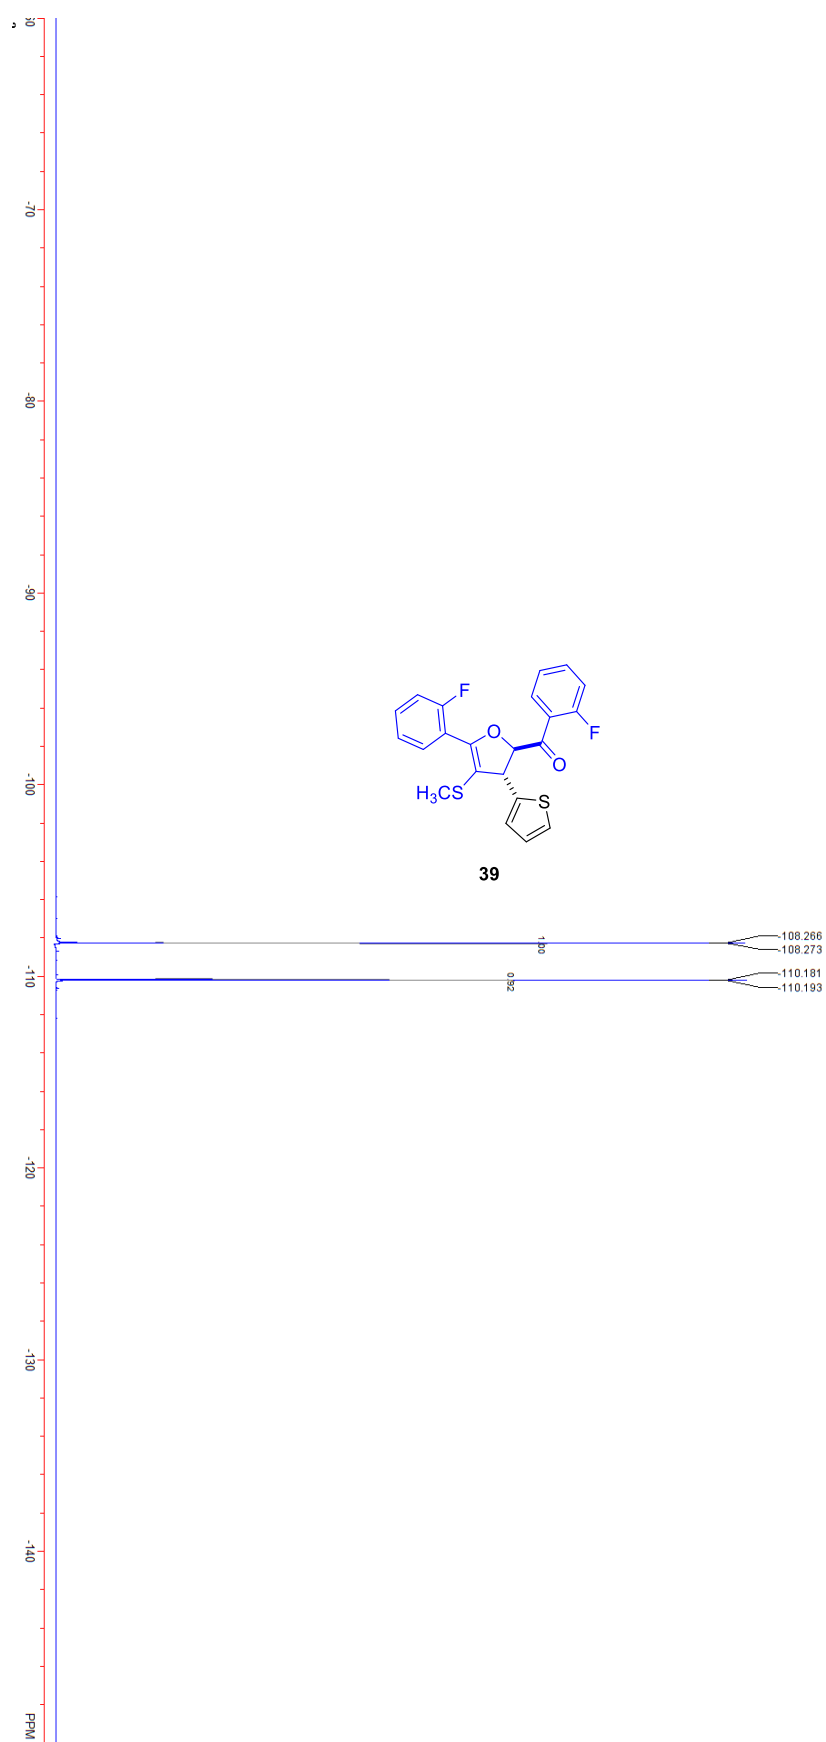

$^1\text{H}$  NMR spectrum of product **40** (400 MHz,  $\text{CDCl}_3$ )

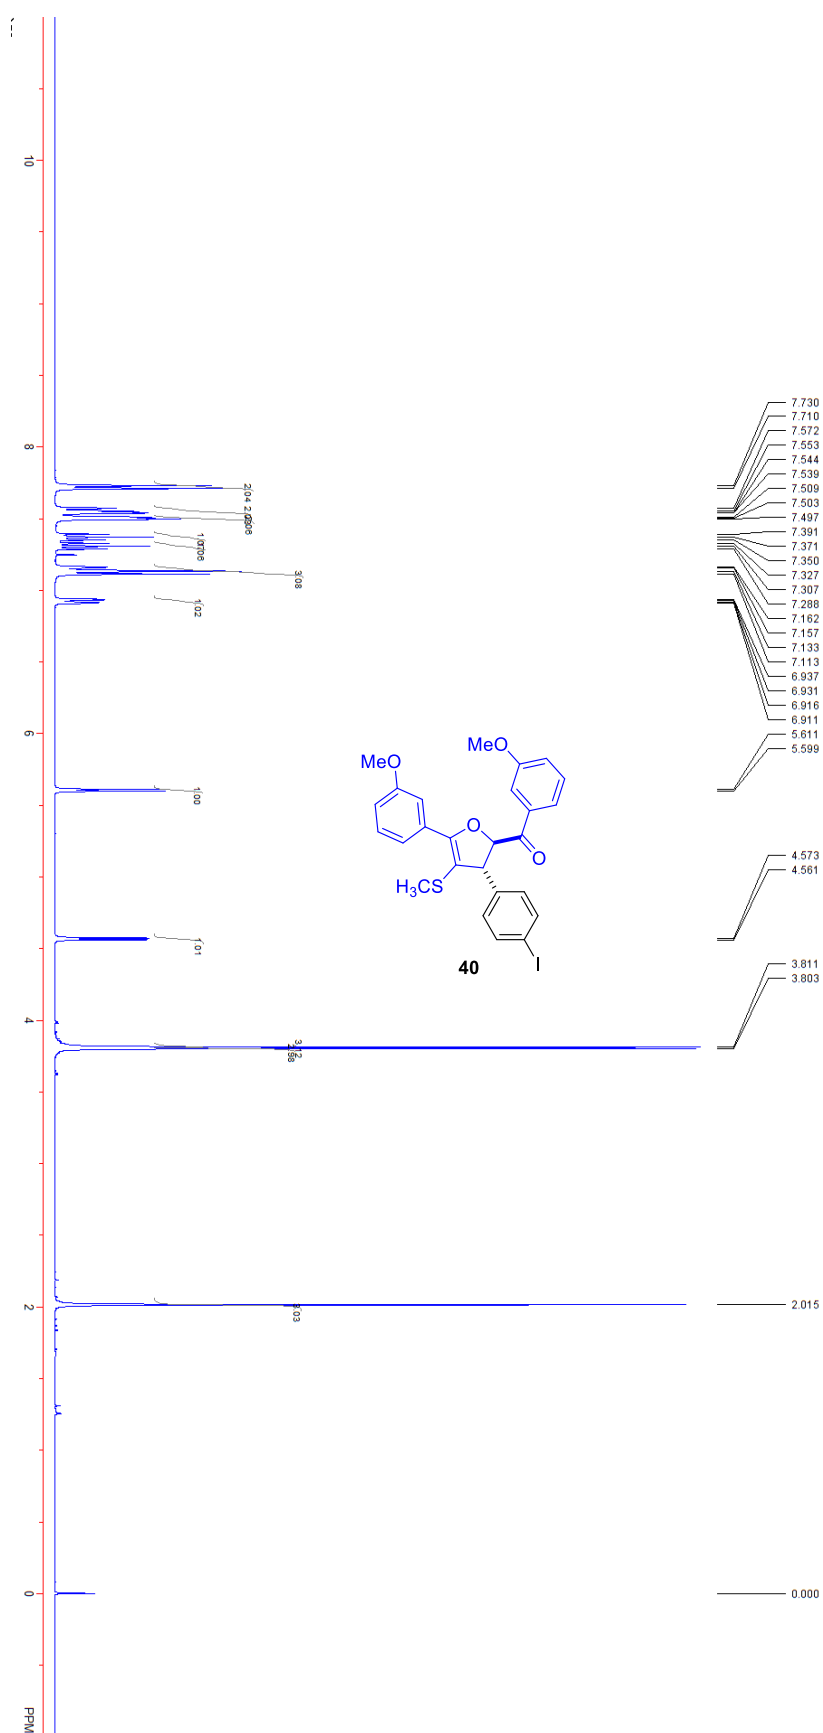



$^{13}\text{C}$  NMR spectrum of product **40** (100 MHz,  $\text{CDCl}_3$ )

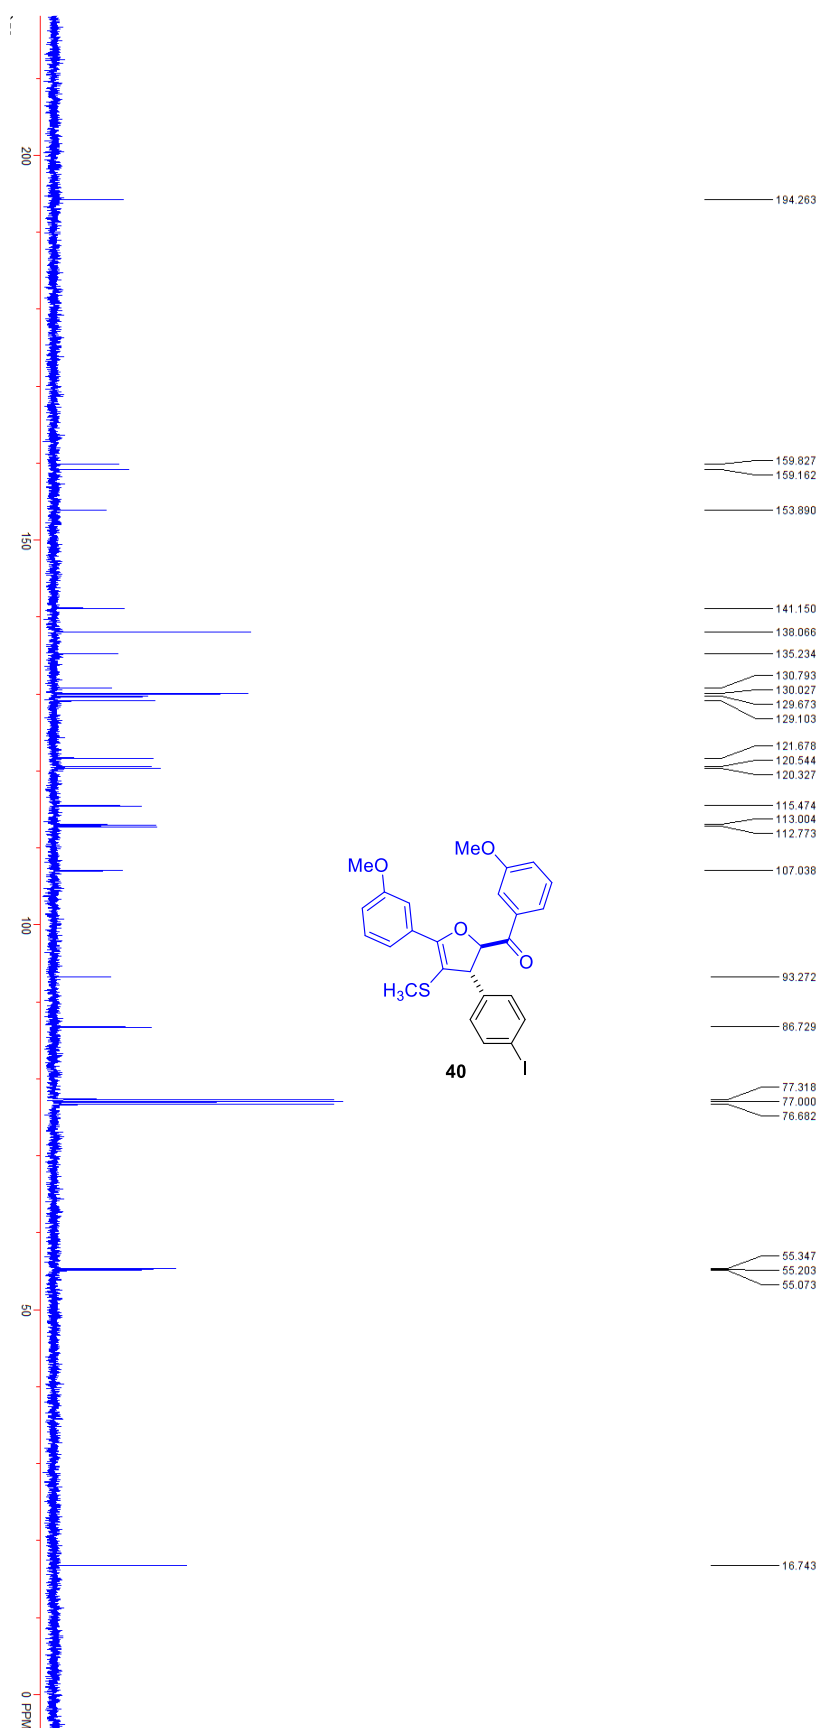

$^1\text{H}$  NMR spectrum of product **41** (400 MHz,  $\text{CDCl}_3$ )

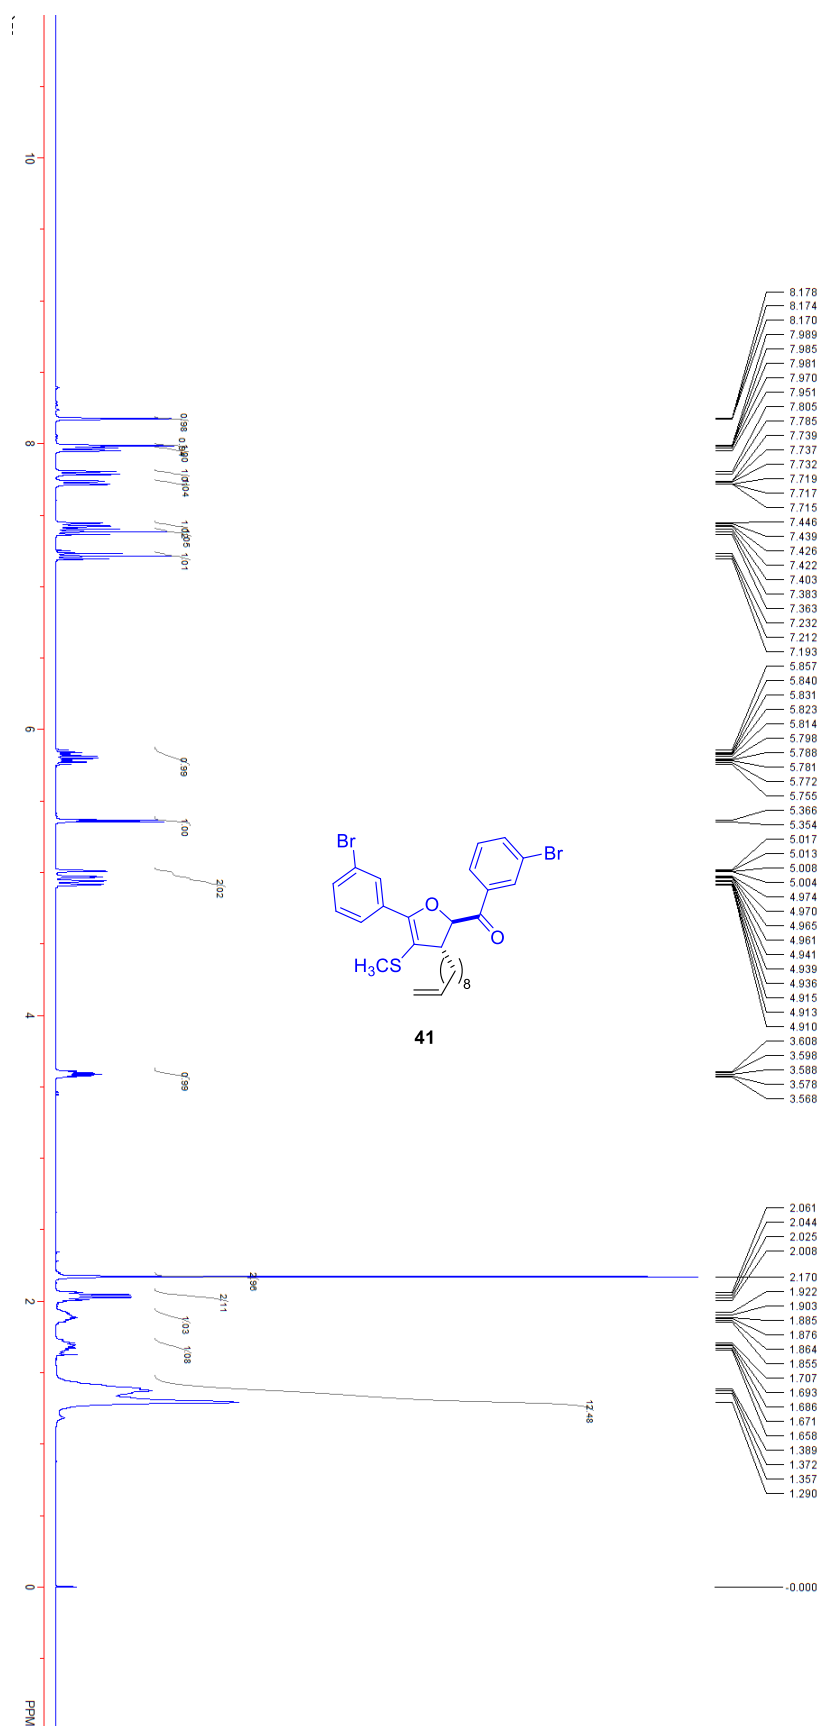

$^{13}\text{C}$  NMR spectrum of product **41** (100 MHz,  $\text{CDCl}_3$ )

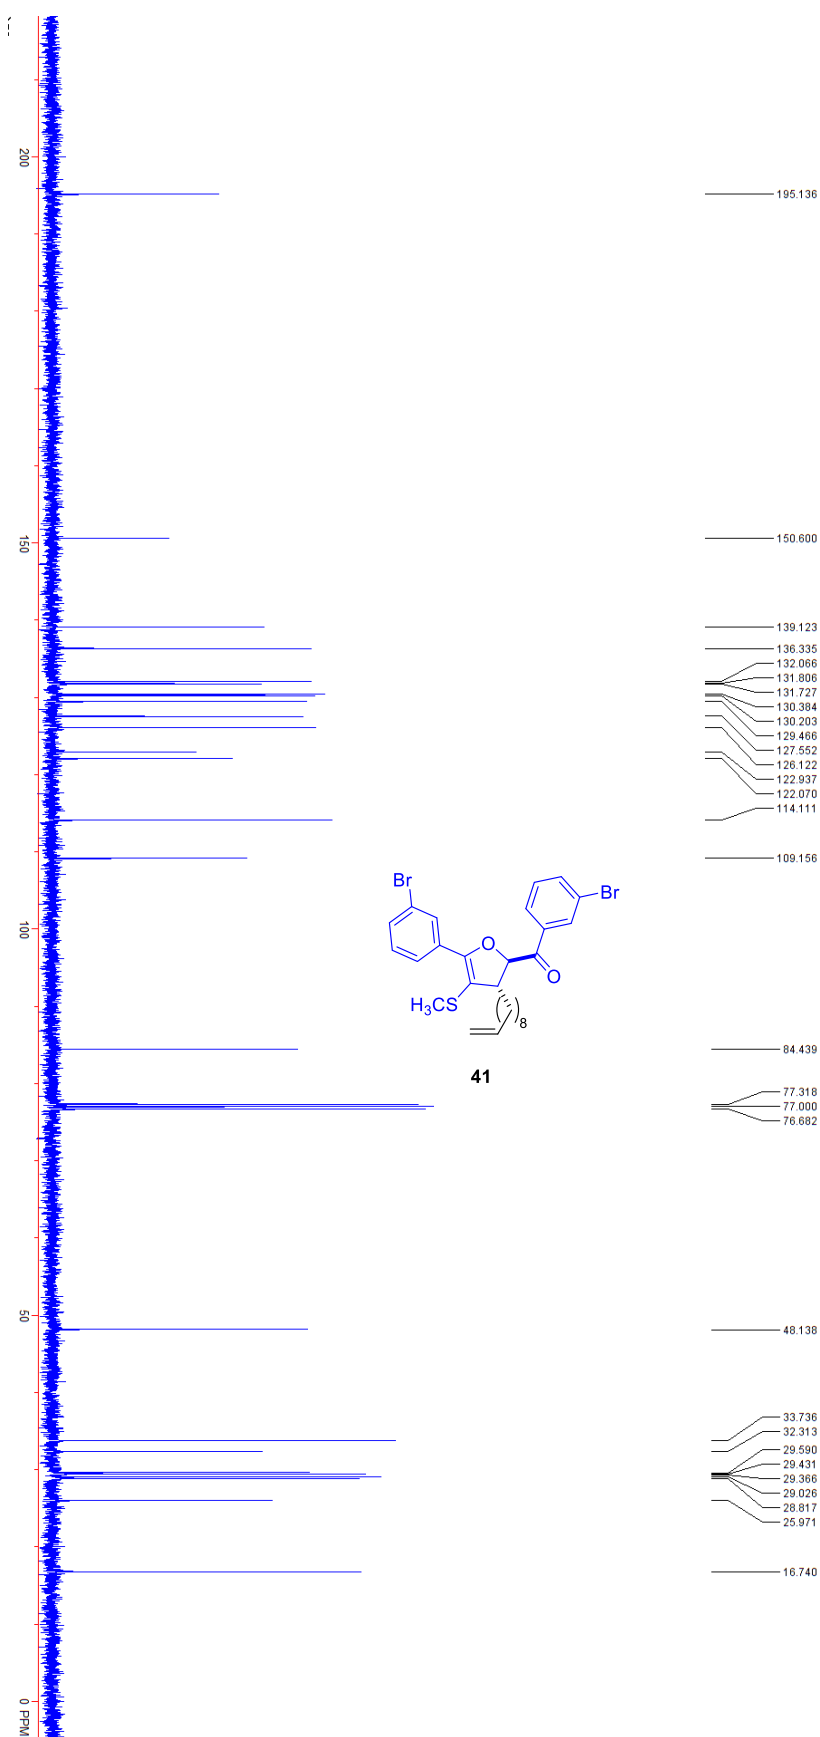

$^1\text{H}$  NMR spectrum of product **42** (400 MHz,  $\text{CDCl}_3$ )

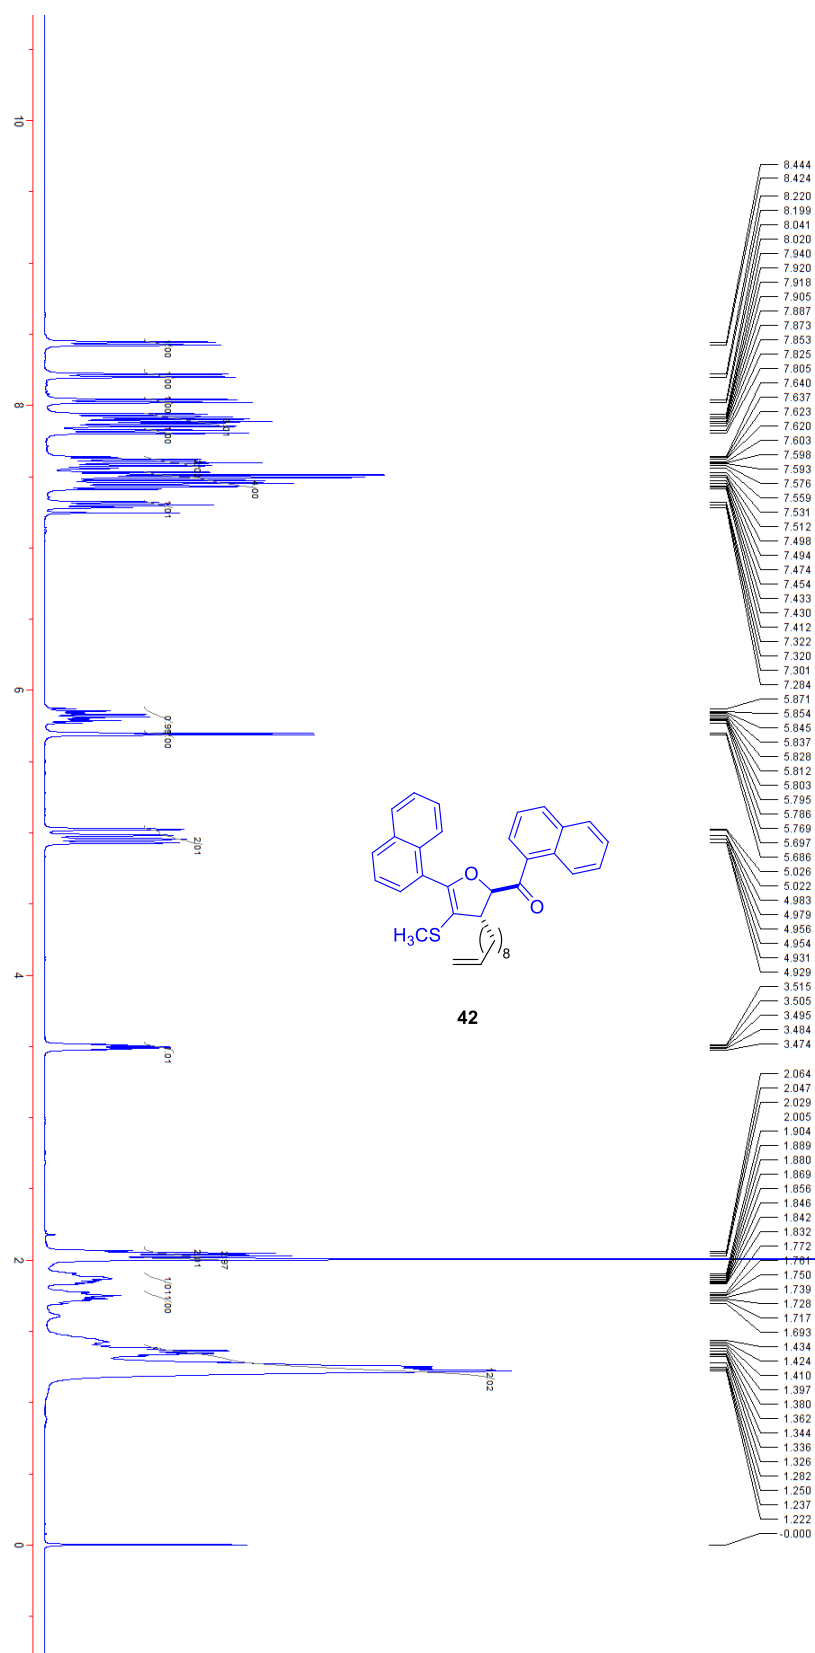

$^{13}\text{C}$  NMR spectrum of product **42** (100 MHz,  $\text{CDCl}_3$ )

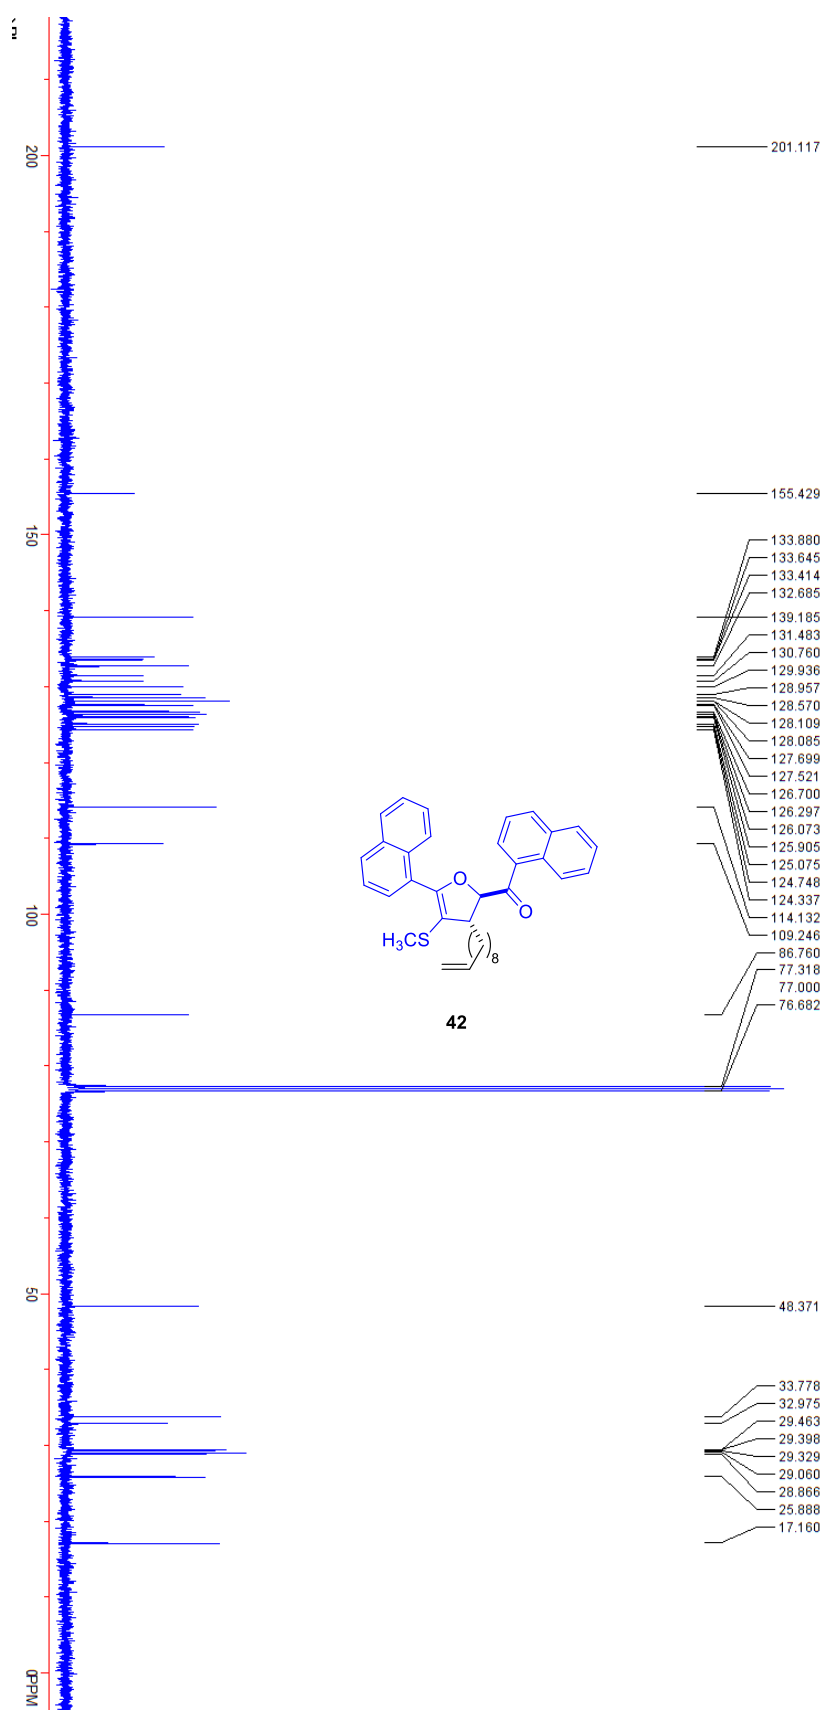

$^1\text{H}$  NMR spectrum of product **43** (400 MHz,  $\text{CDCl}_3$ )

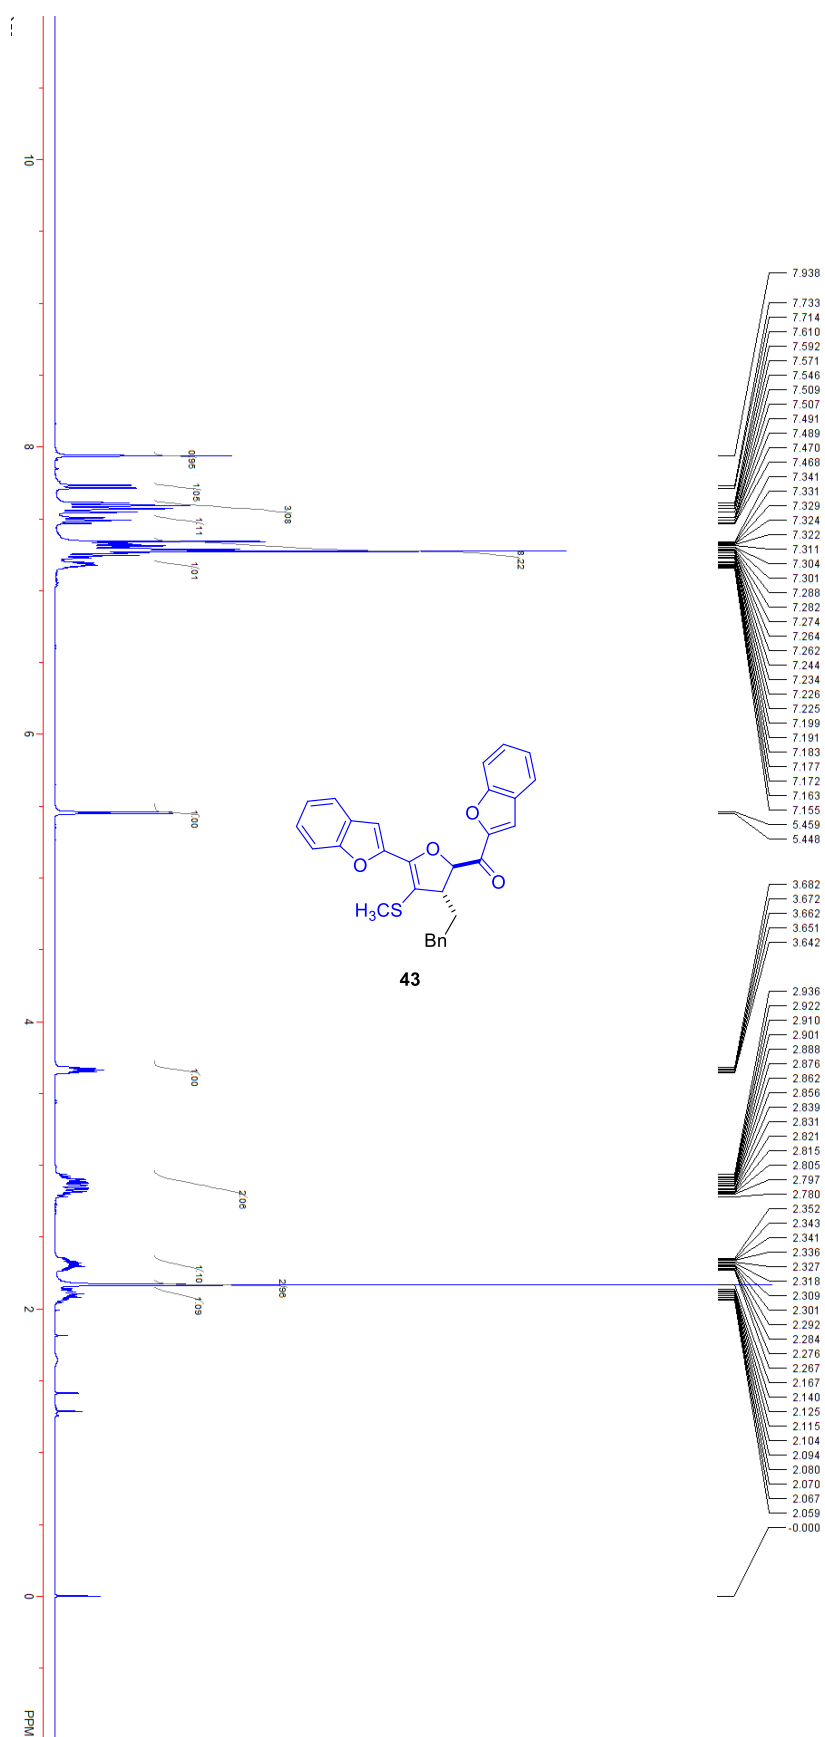

$^{13}\text{C}$  NMR spectrum of product **43** (100 MHz,  $\text{CDCl}_3$ )

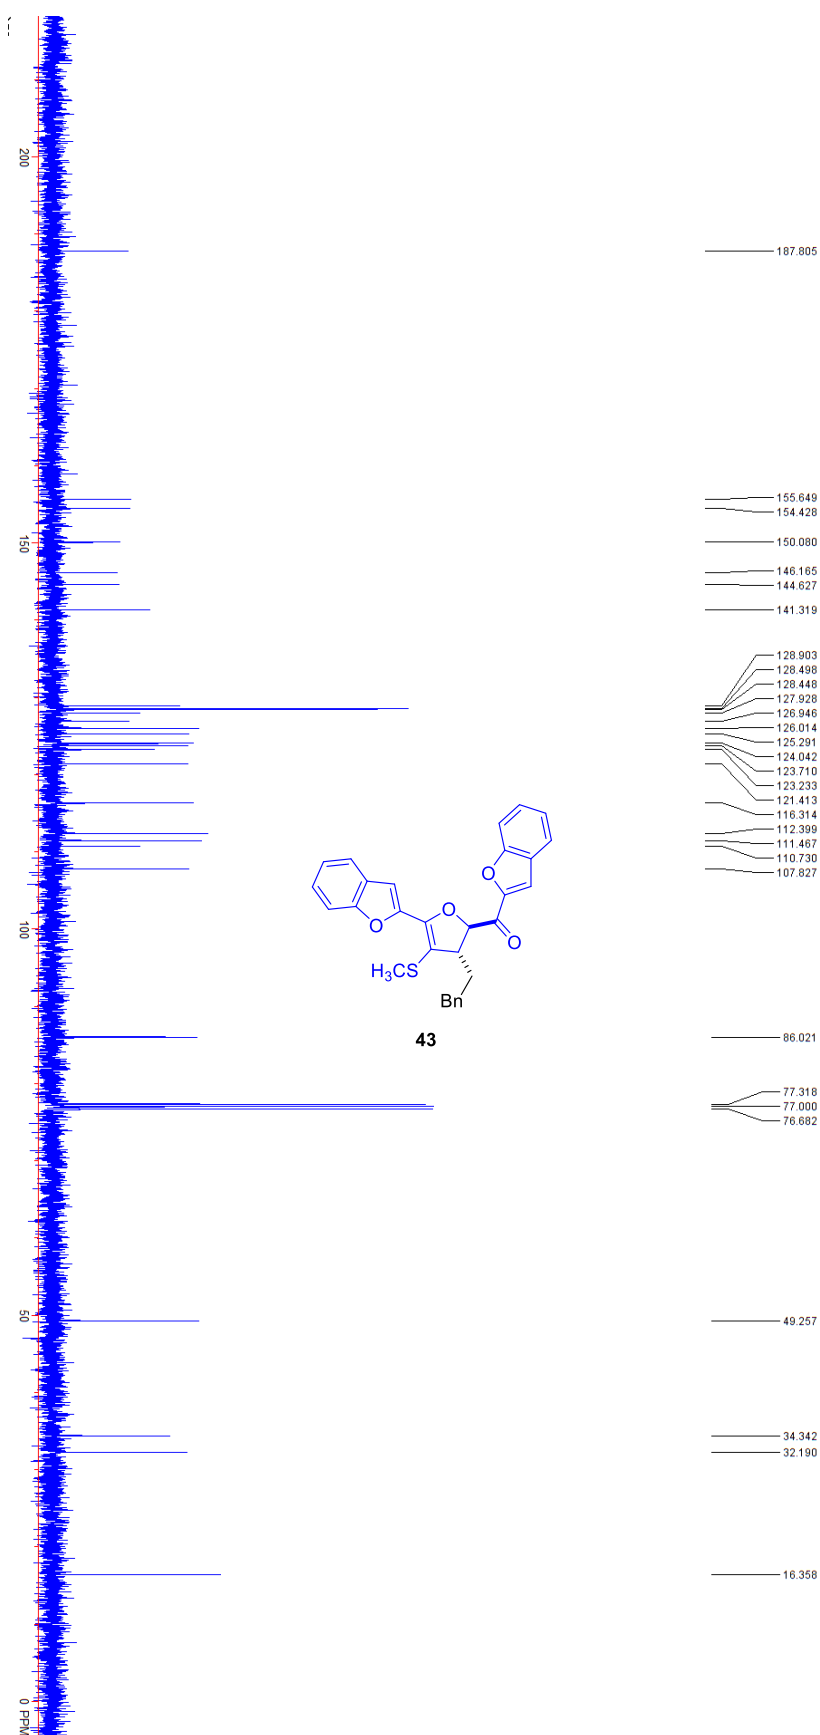

$^1\text{H}$  NMR spectrum of product **44** (400 MHz,  $\text{CDCl}_3$ )

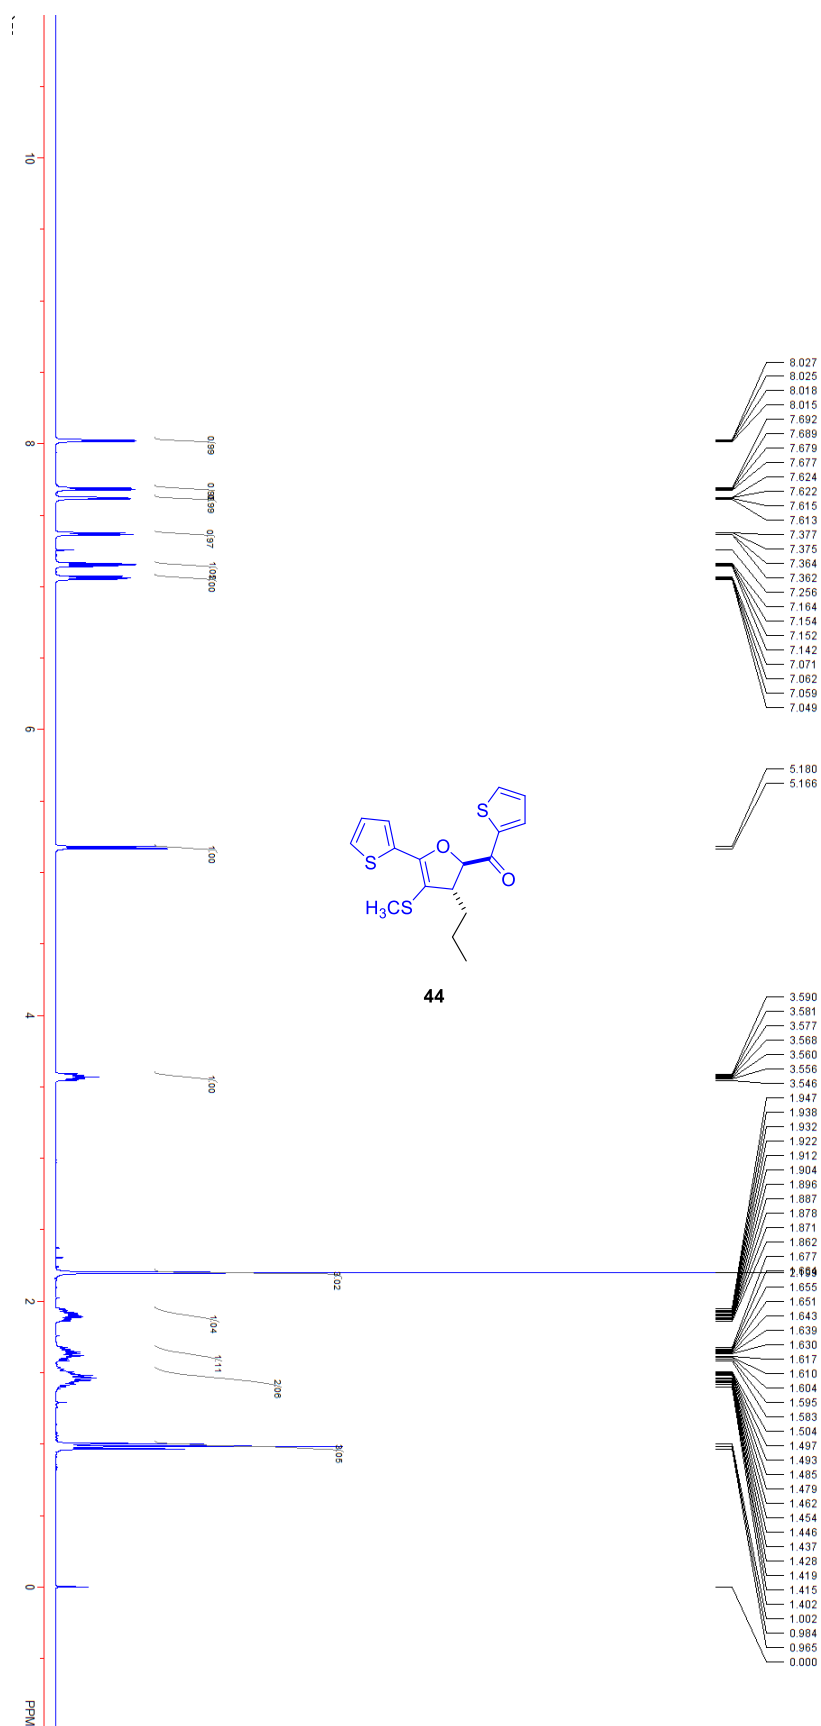



$^{13}\text{C}$  NMR spectrum of product **44** (100 MHz,  $\text{CDCl}_3$ )

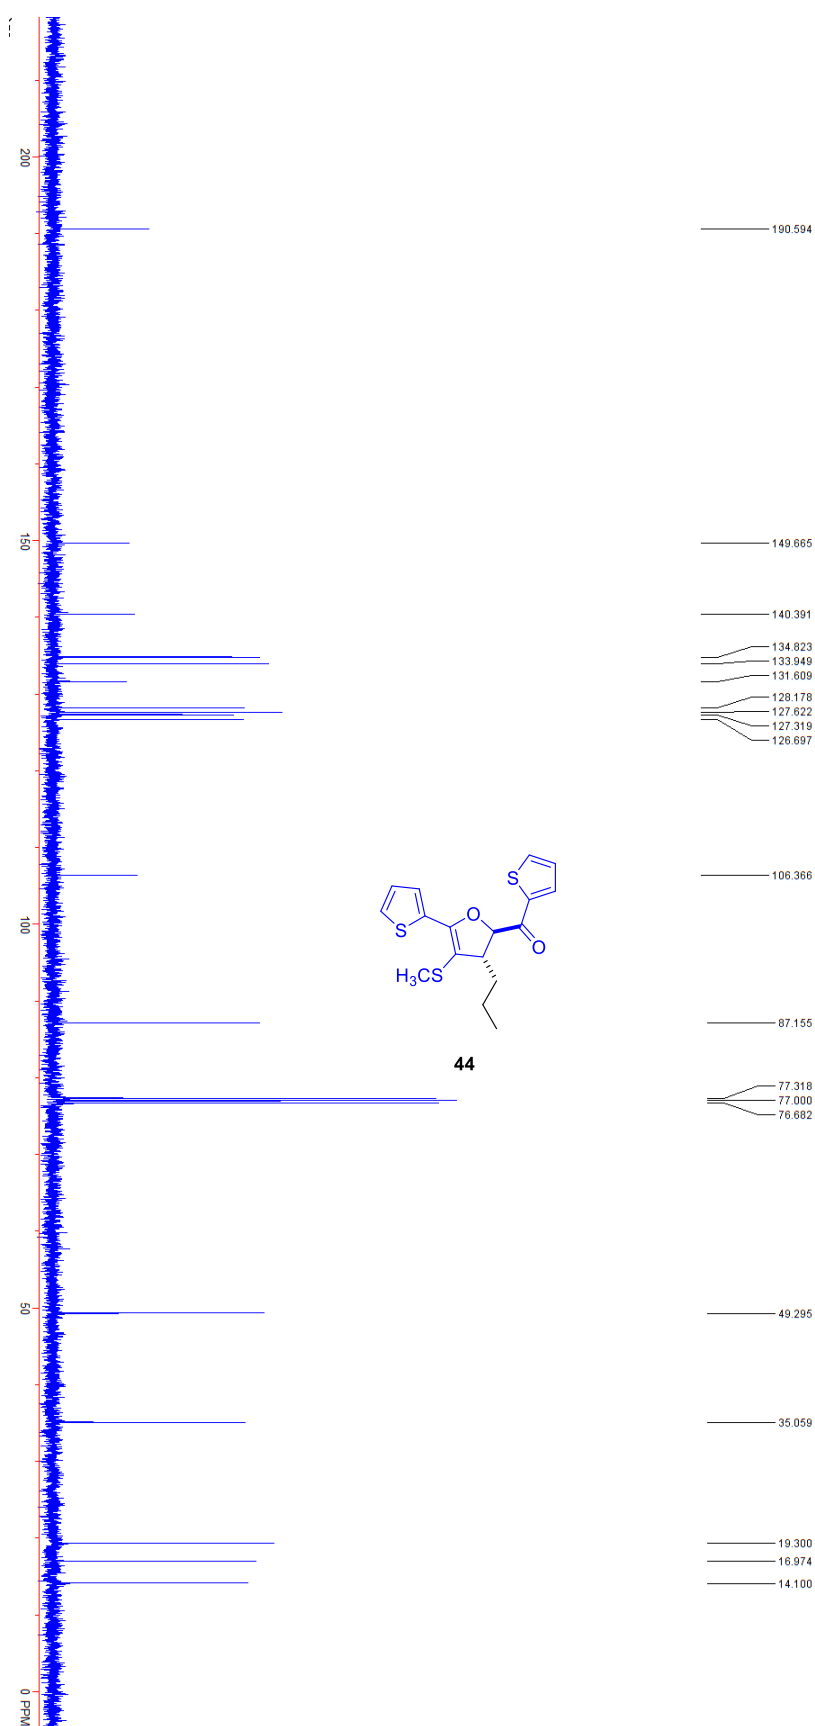

$^1\text{H}$  NMR spectrum of product **45** (400 MHz,  $\text{CDCl}_3$ )

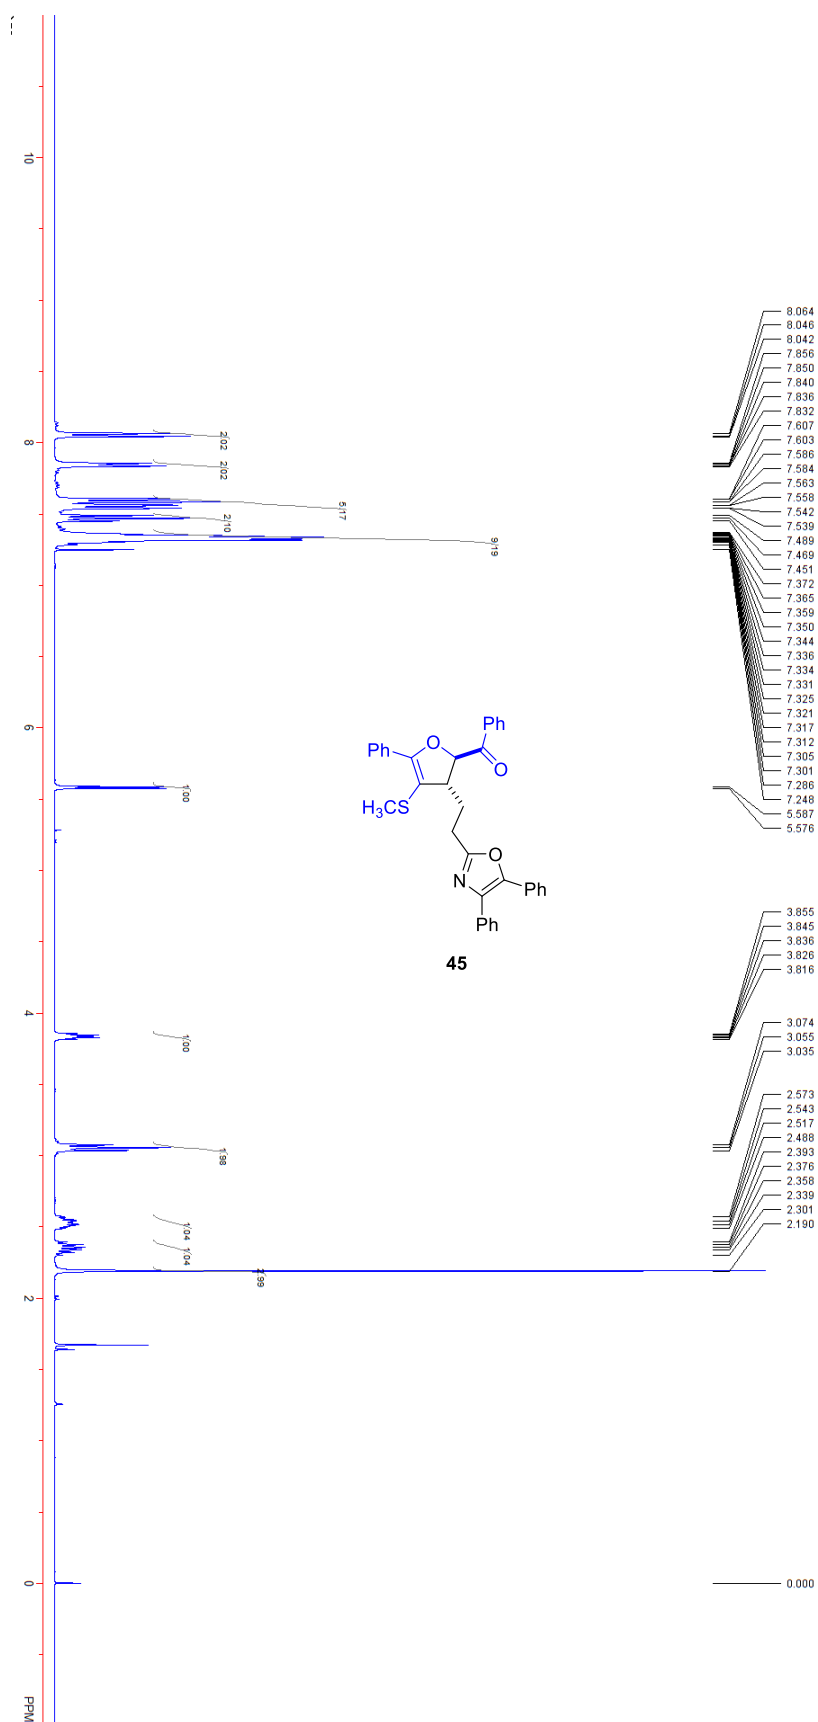

$^{13}\text{C}$  NMR spectrum of product **45** (100 MHz,  $\text{CDCl}_3$ )

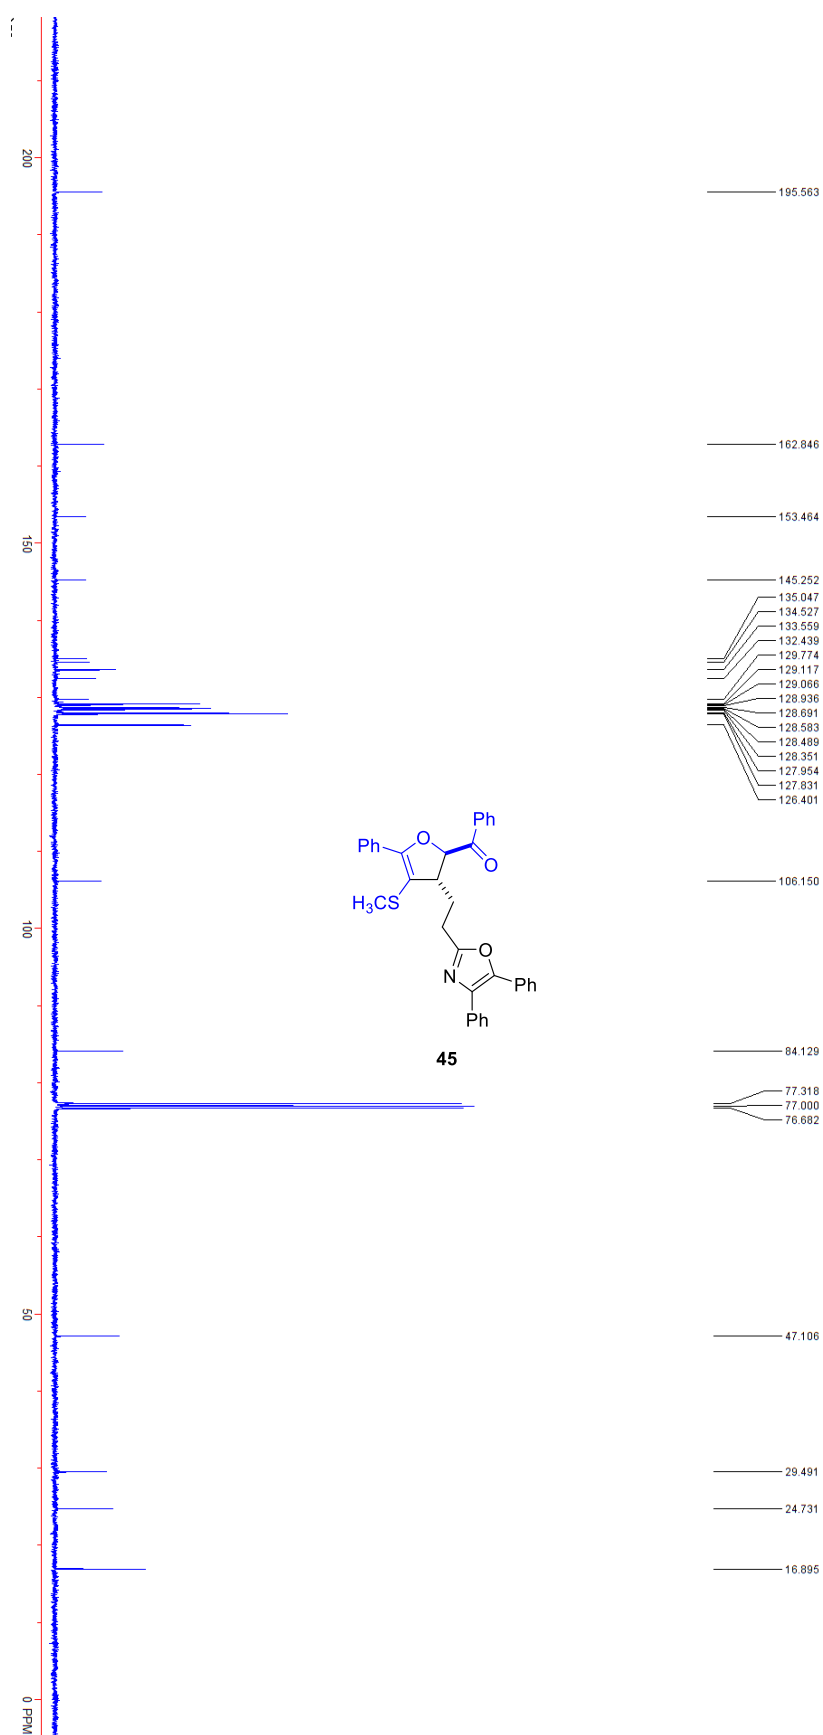

$^1\text{H}$  NMR spectrum of product **46** (400 MHz,  $\text{CDCl}_3$ )

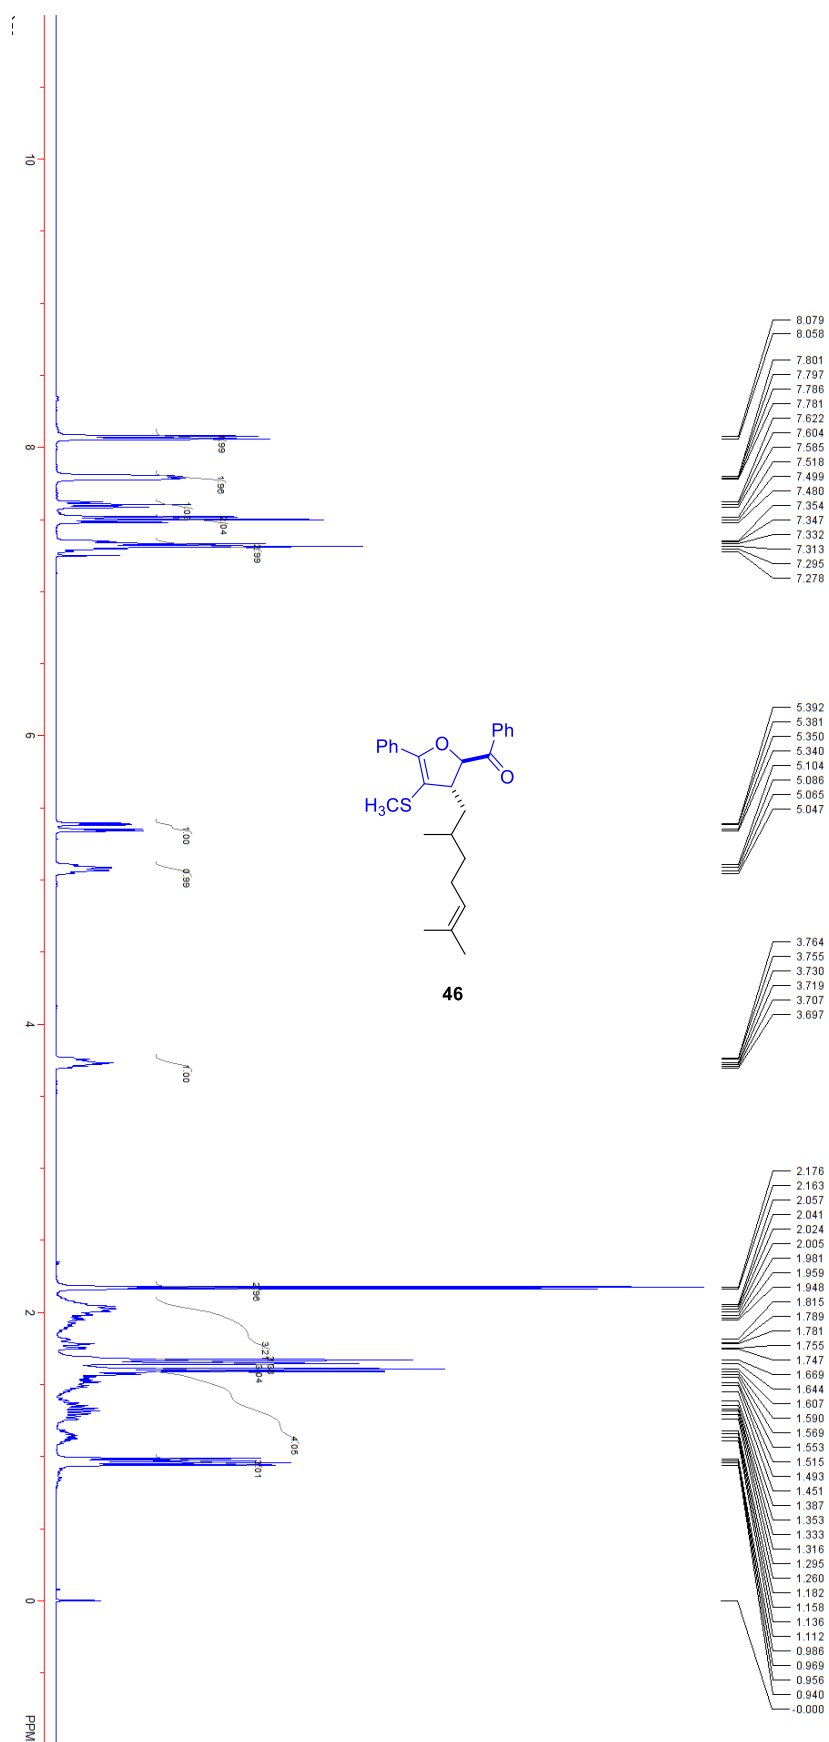

$^{13}\text{C}$  NMR spectrum of product **46** (100 MHz,  $\text{CDCl}_3$ )

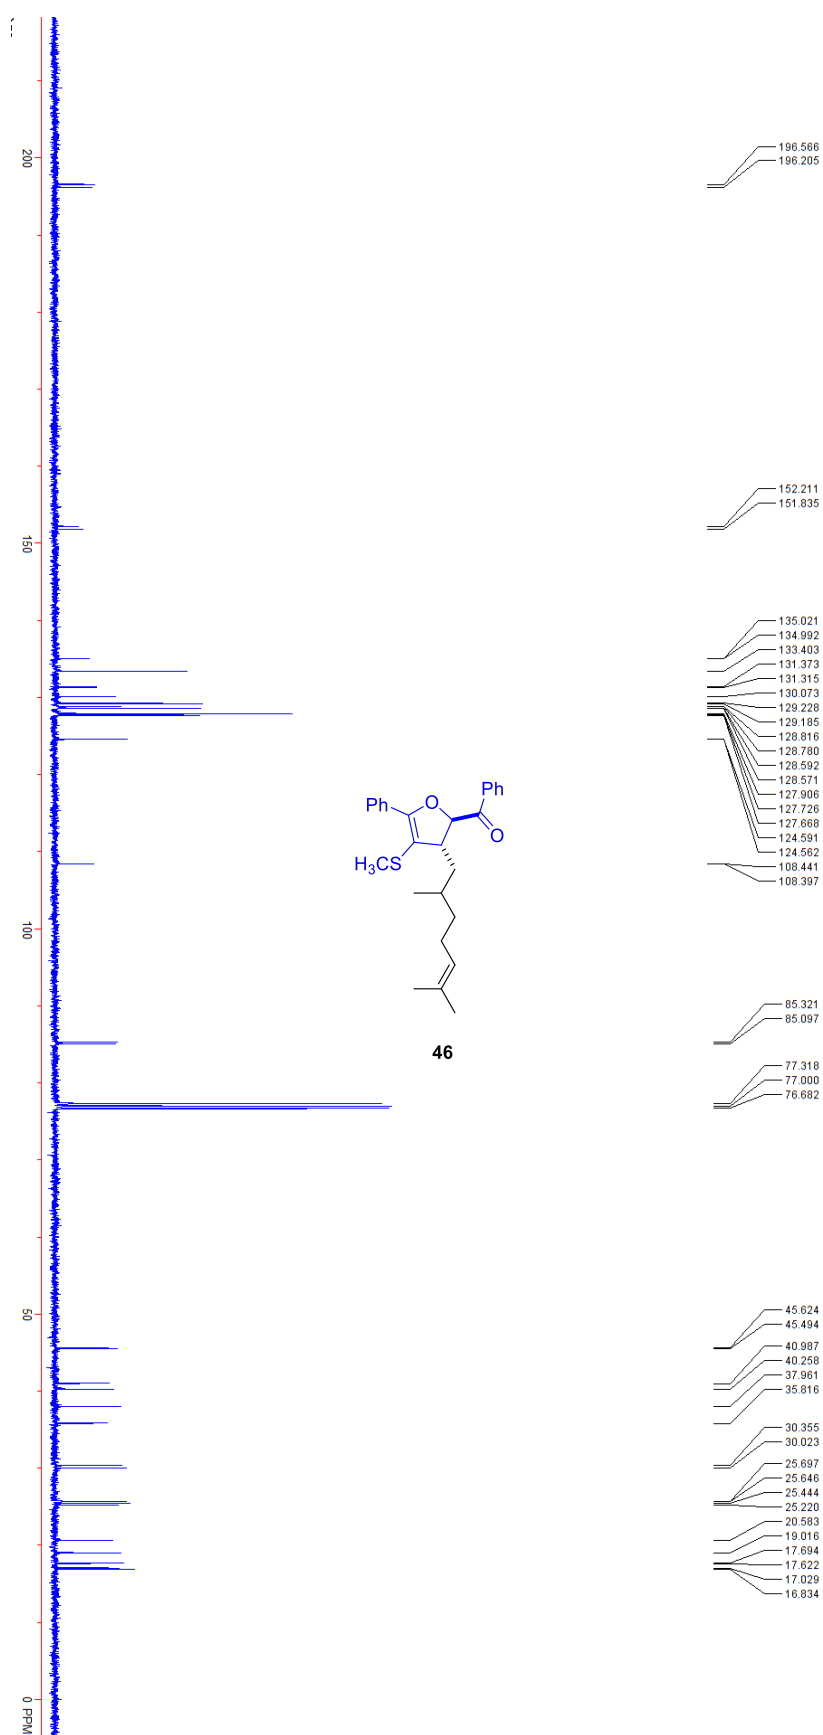

$^1\text{H}$  NMR spectrum of product **47** (400 MHz,  $\text{CDCl}_3$ )

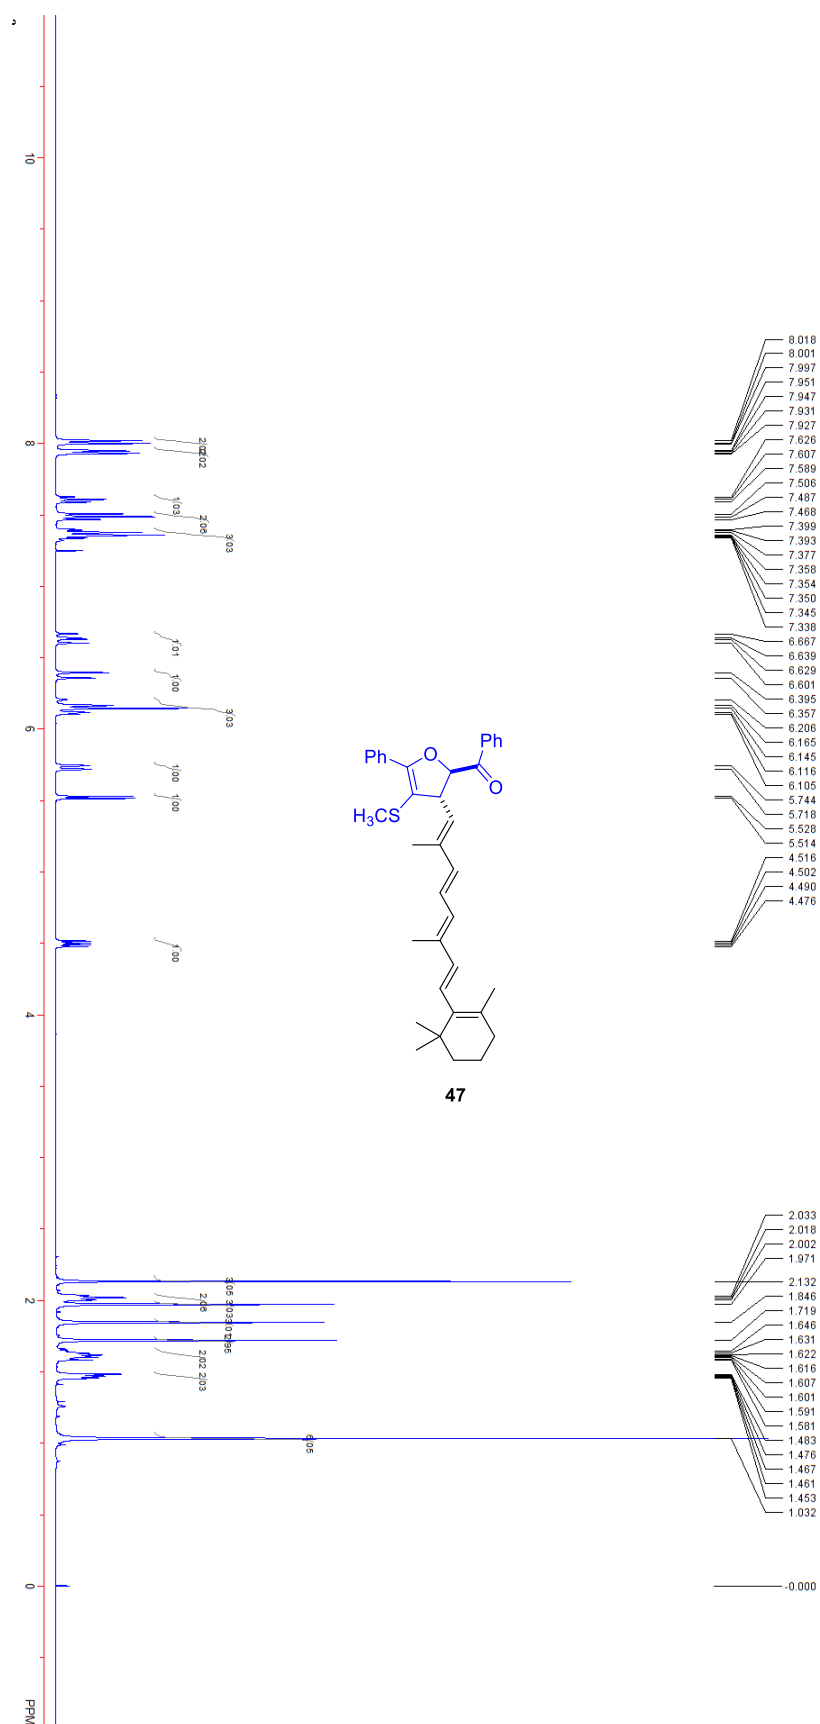

$^{13}\text{C}$  NMR spectrum of product **47** (100 MHz,  $\text{CDCl}_3$ )

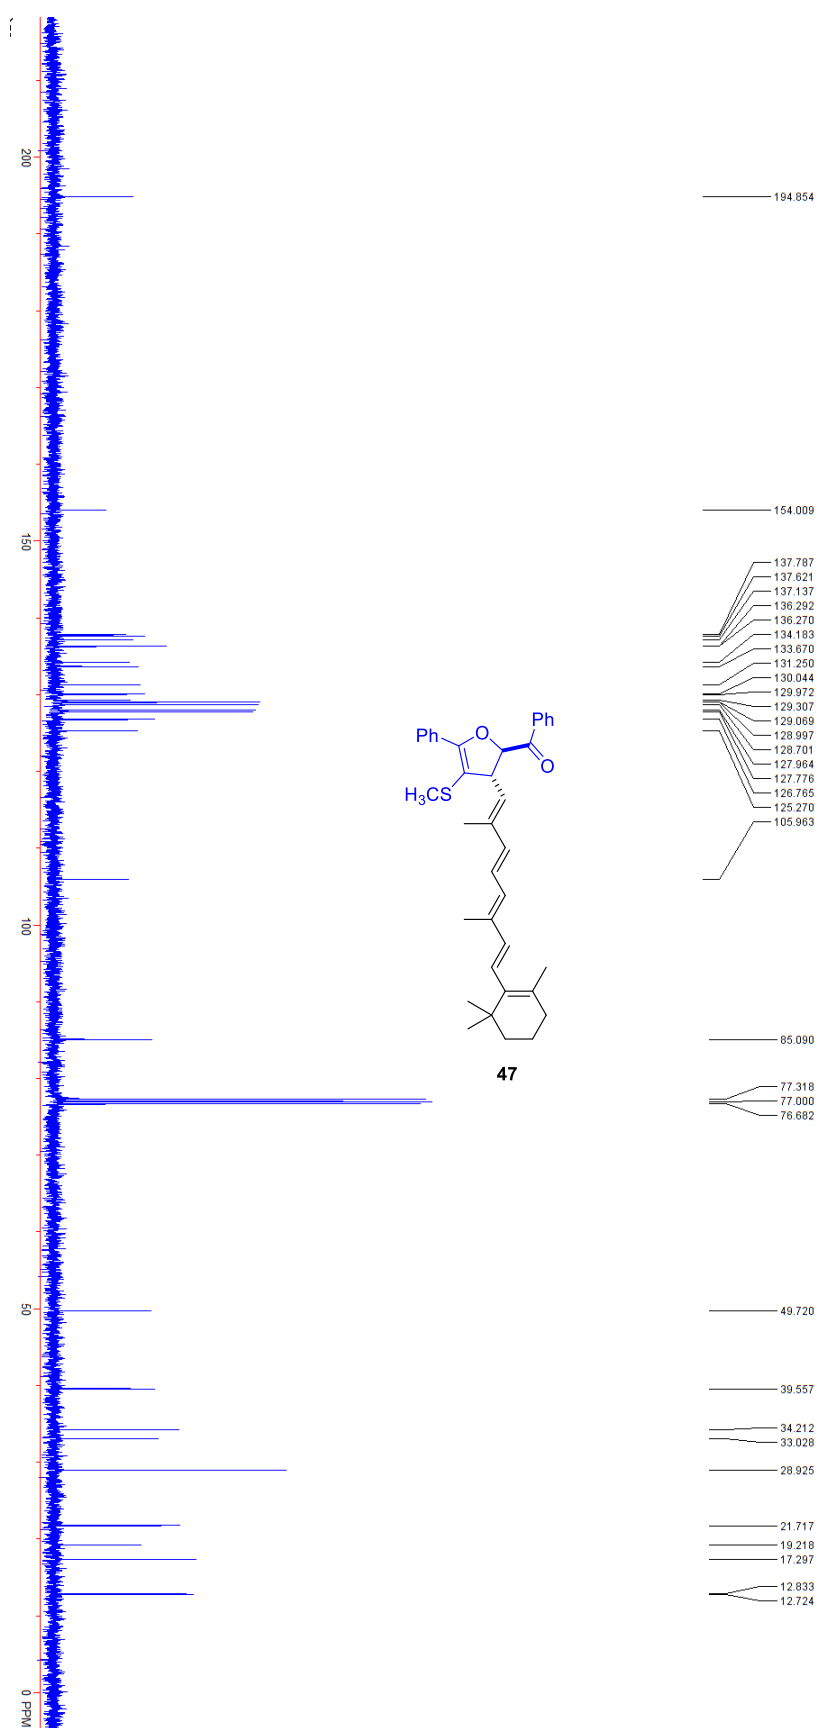

$^1\text{H}$  NMR spectrum of product **48** (400 MHz,  $\text{CDCl}_3$ )

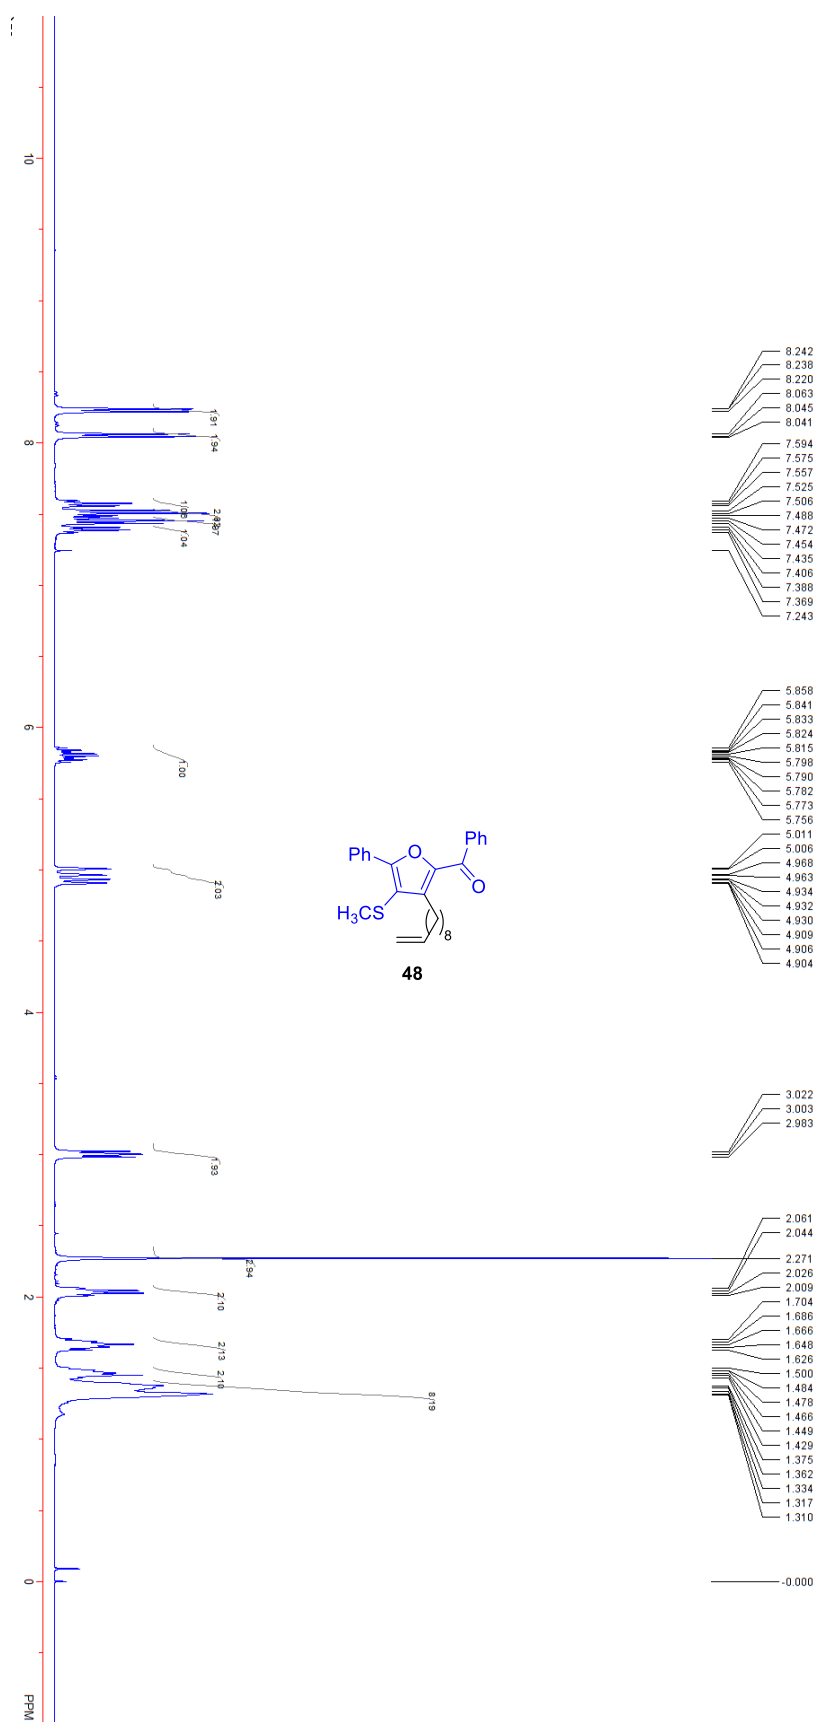



<sup>13</sup>C NMR spectrum of product **48** (100 MHz, CDCl<sub>3</sub>)

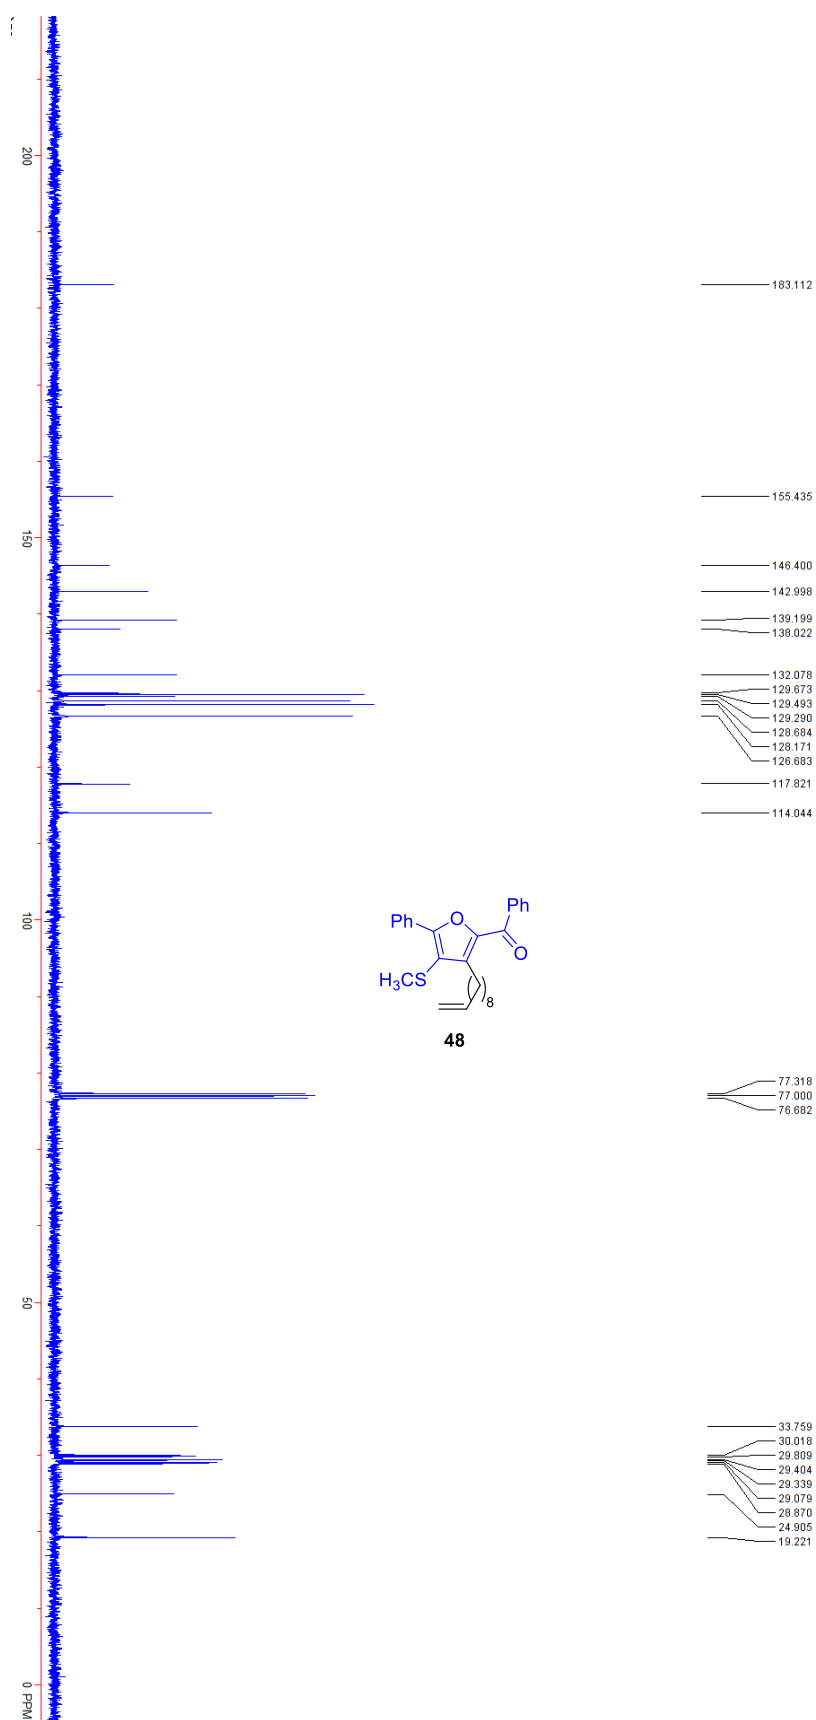

$^1\text{H}$  NMR spectrum of product **49** (400 MHz,  $\text{CDCl}_3$ )

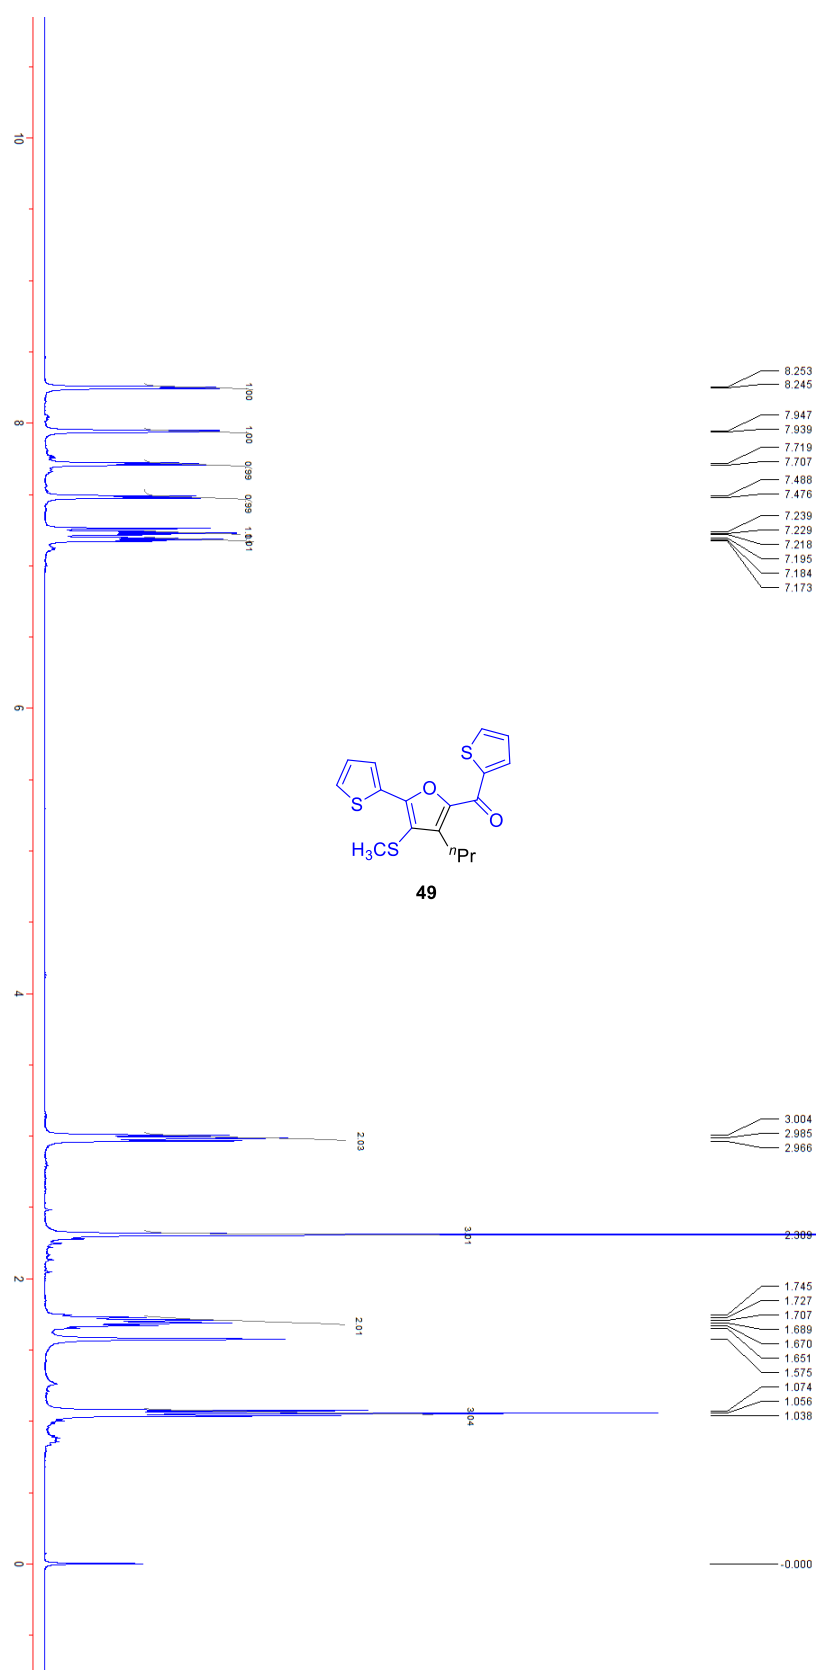

$^{13}\text{C}$  NMR spectrum of product **49** (100 MHz,  $\text{CDCl}_3$ )

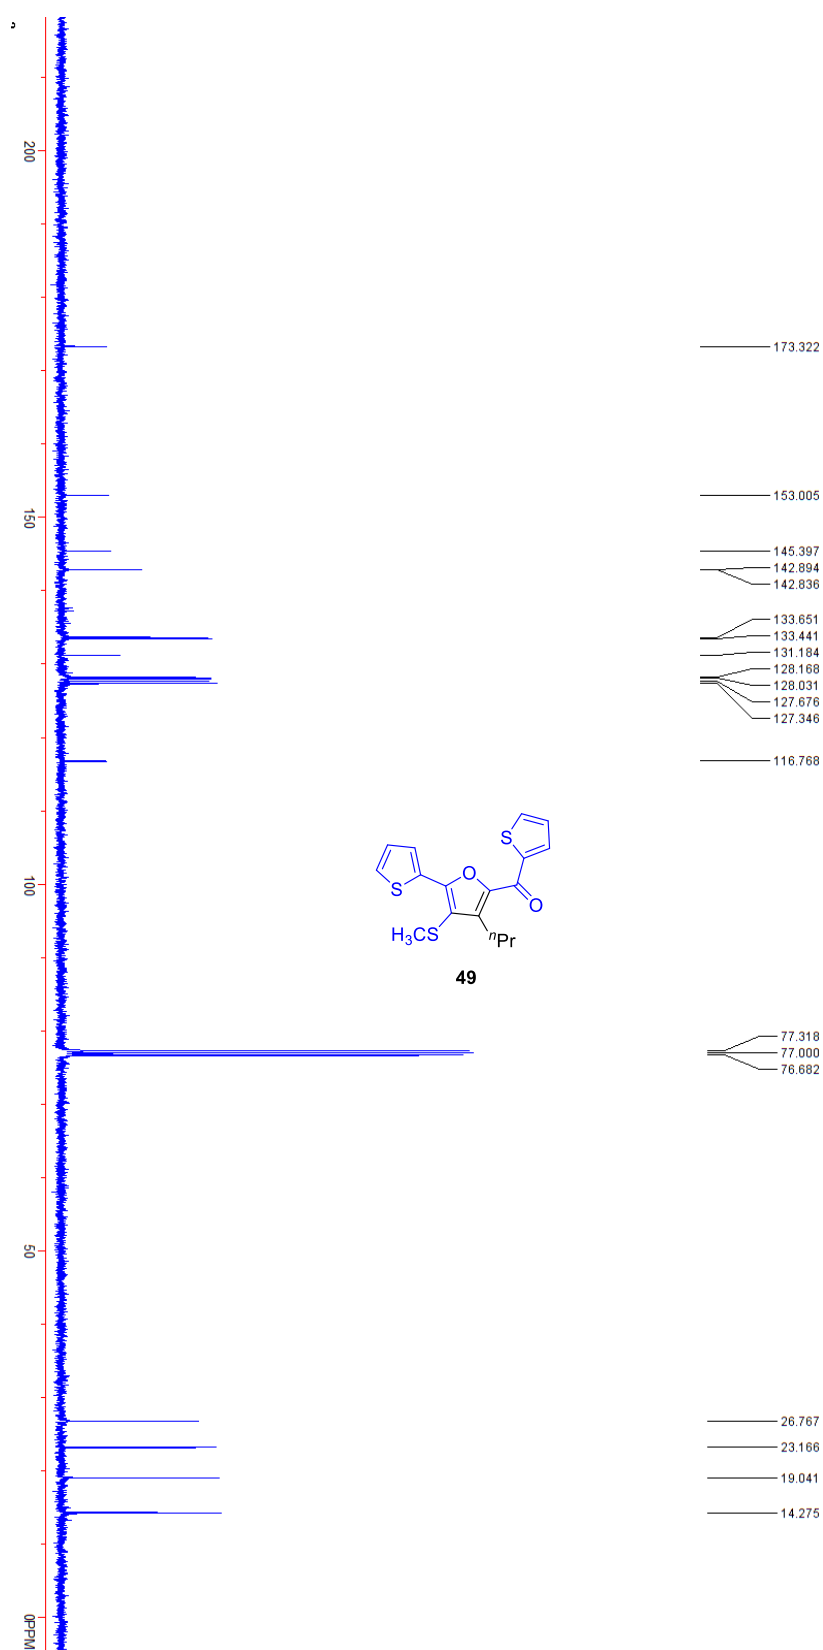

$^1\text{H}$  NMR spectrum of product **50** (400 MHz,  $\text{CDCl}_3$ )

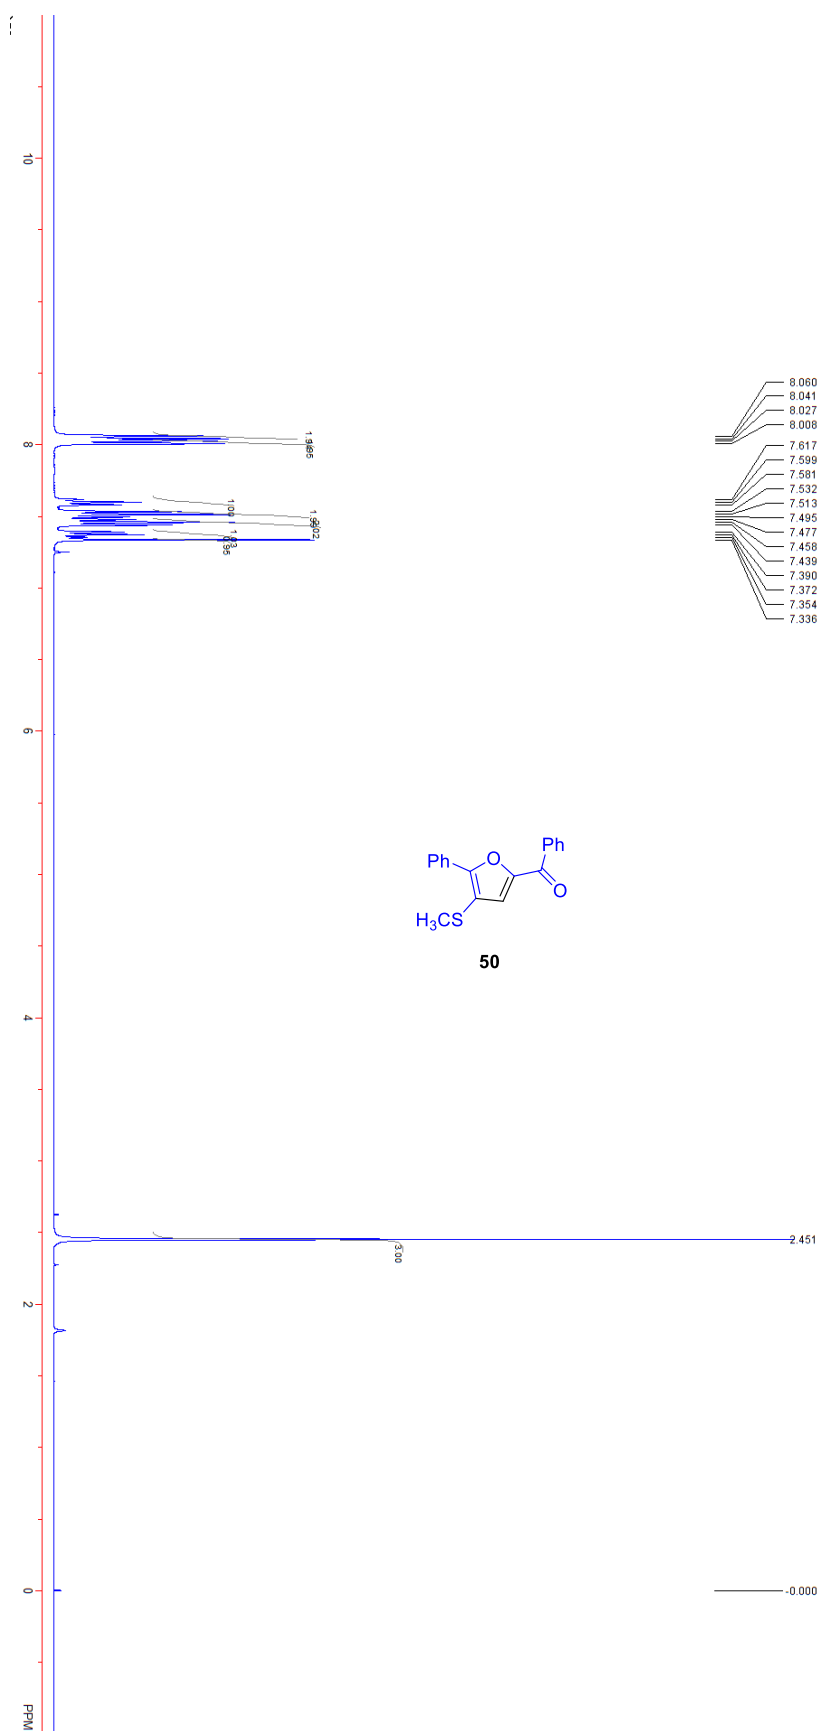

$^{13}\text{C}$  NMR spectrum of product **50** (100 MHz,  $\text{CDCl}_3$ )

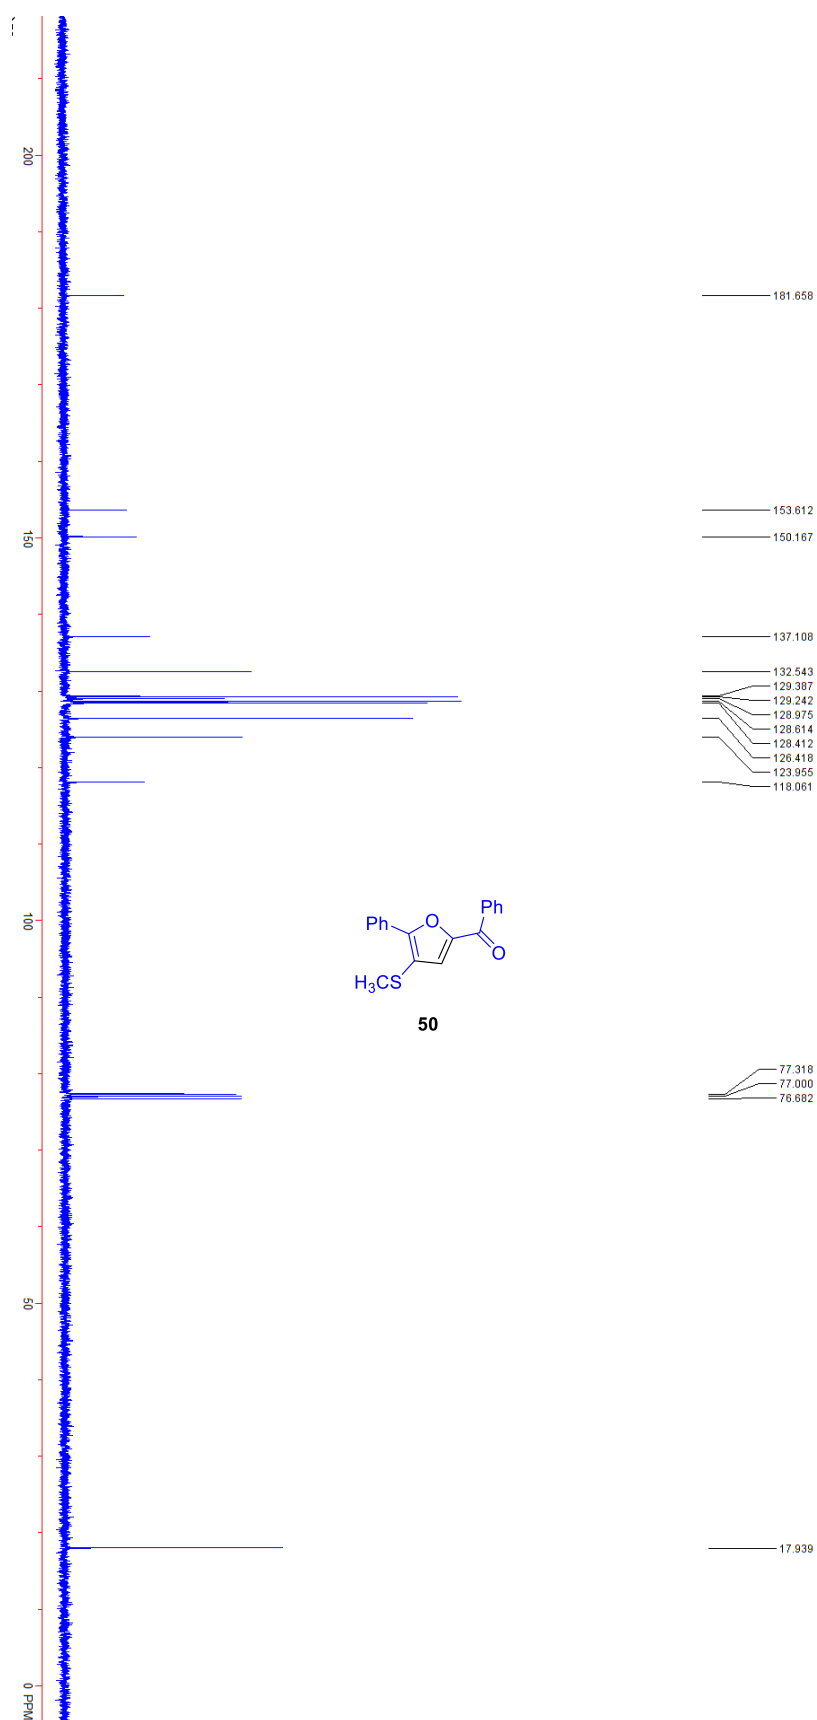

$^1\text{H}$  NMR spectrum of product **51** (400 MHz,  $\text{CDCl}_3$ )

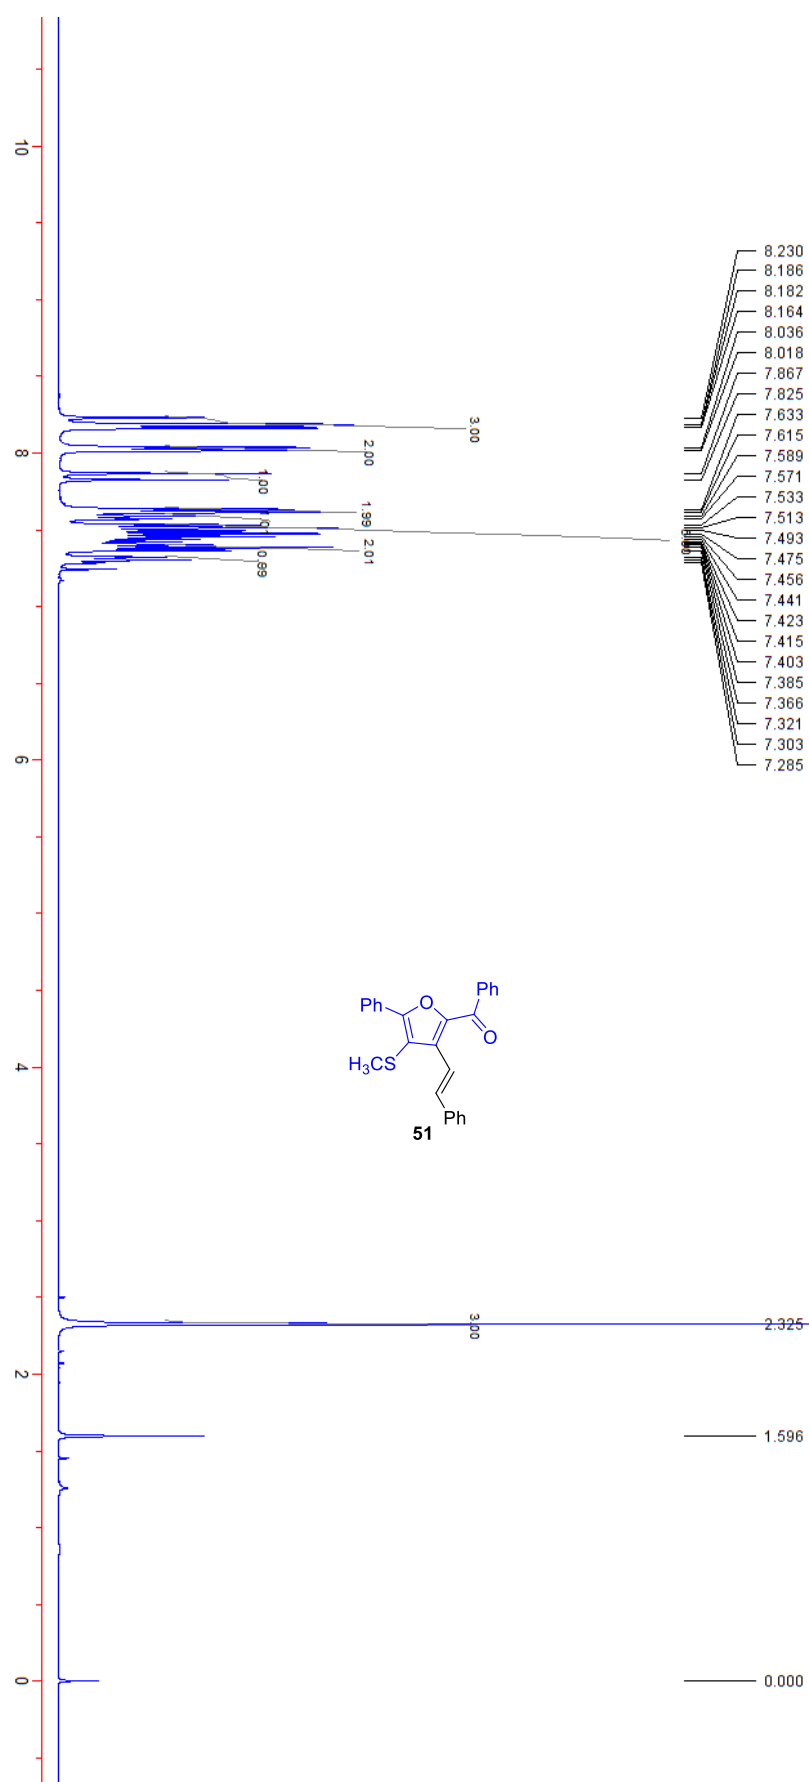

$^{13}\text{C}$  NMR spectrum of product **51** (100 MHz,  $\text{CDCl}_3$ )

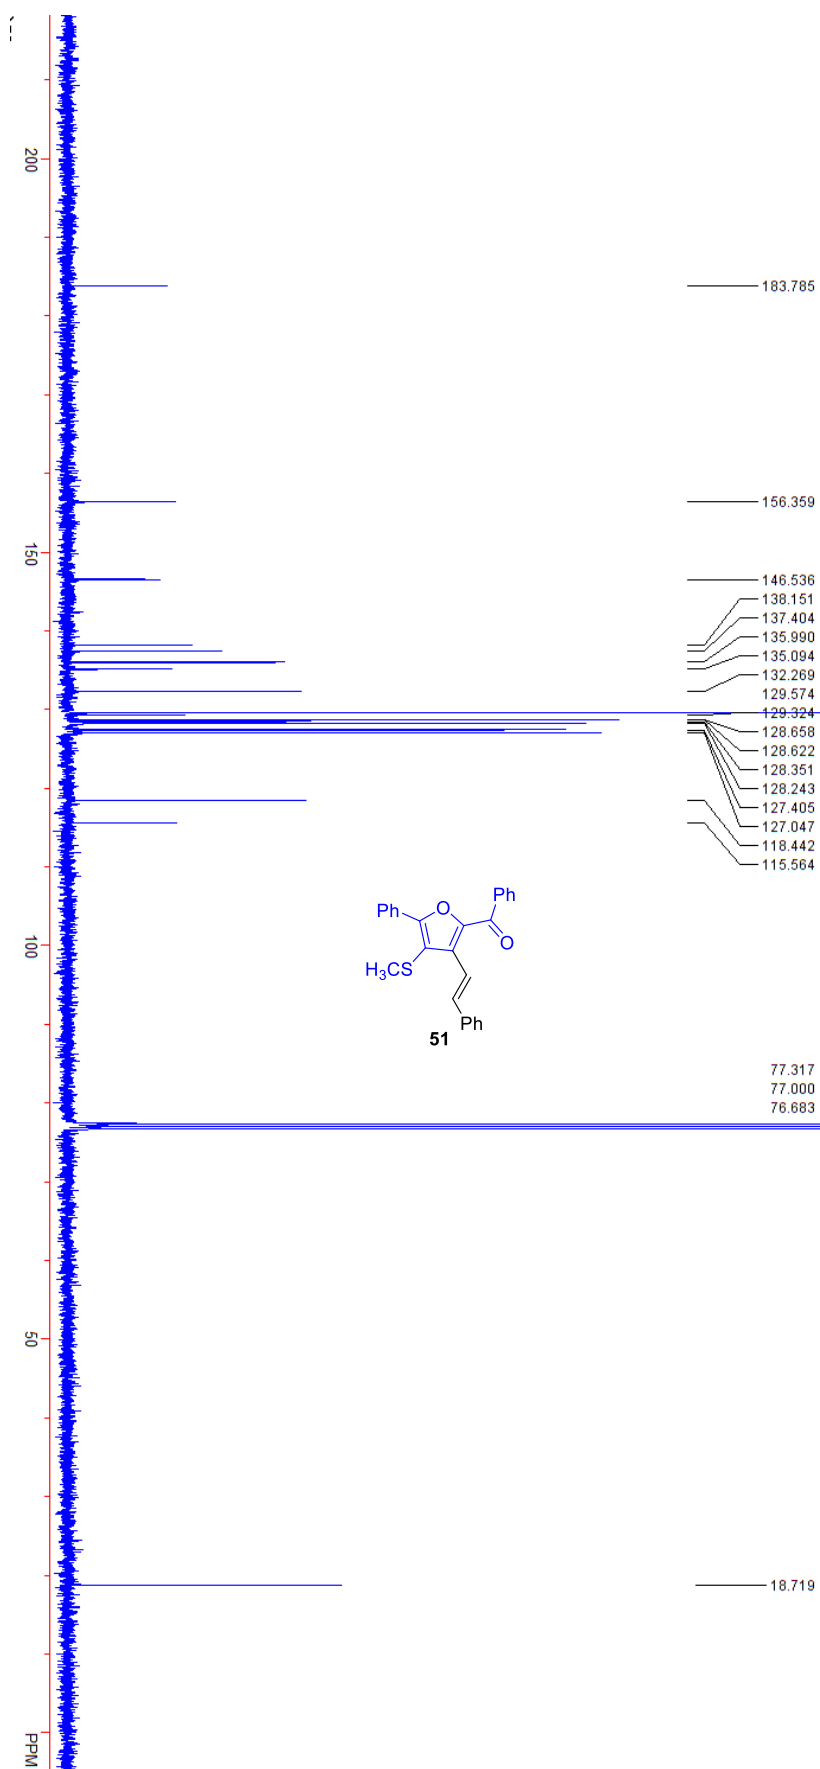

$^1\text{H}$  NMR spectrum of product **52** (400 MHz,  $\text{CDCl}_3$ )

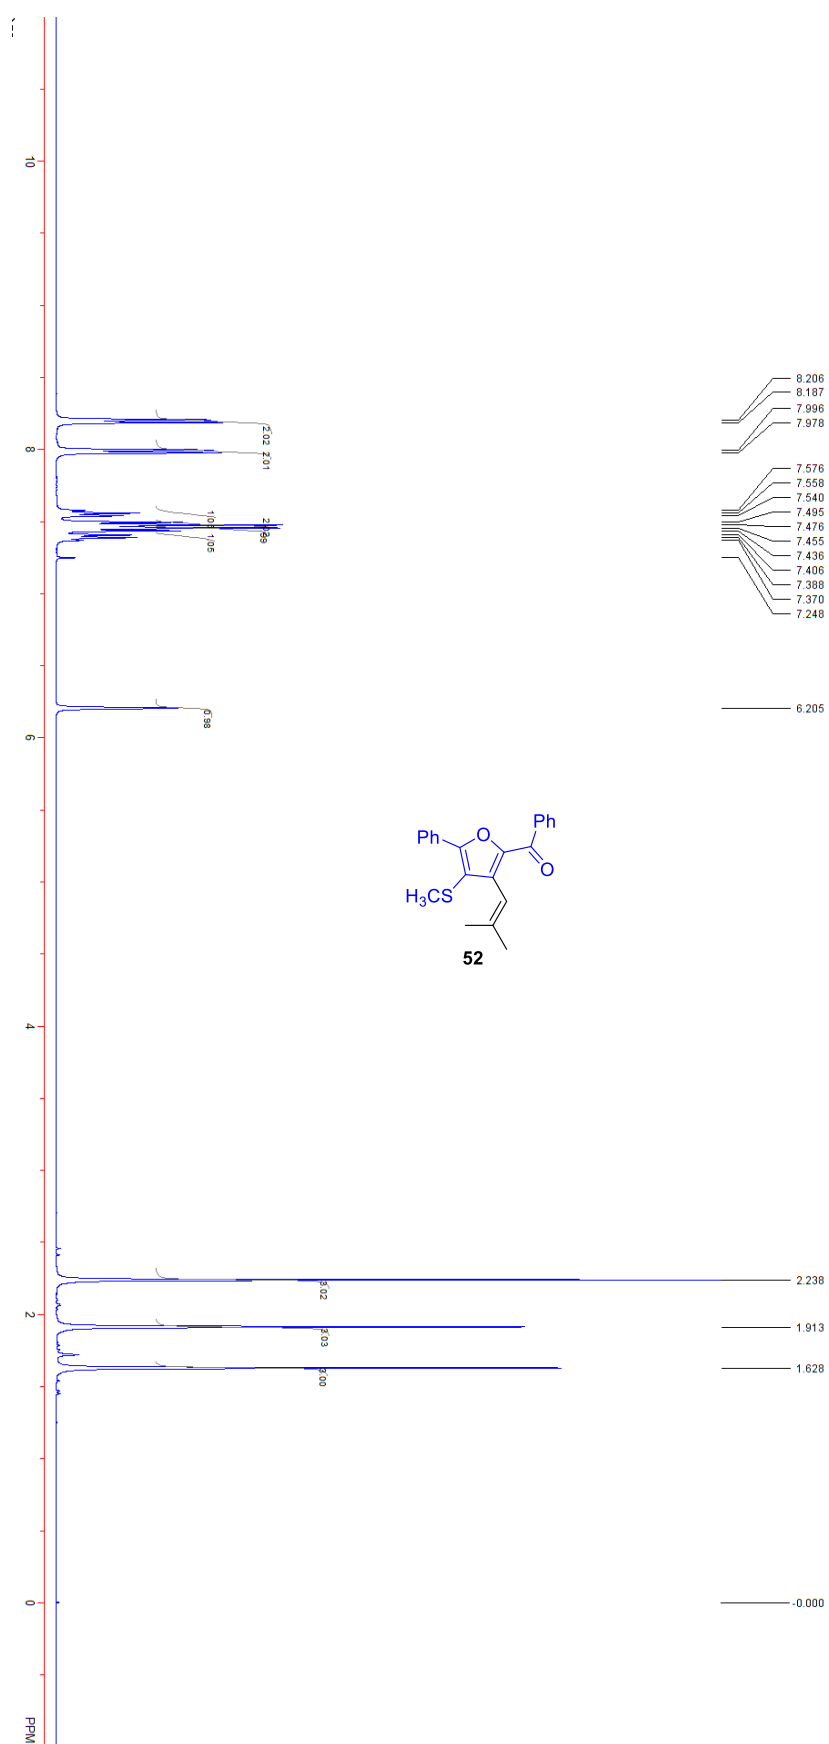



$^{13}\text{C}$  NMR spectrum of product **52** (100 MHz,  $\text{CDCl}_3$ )

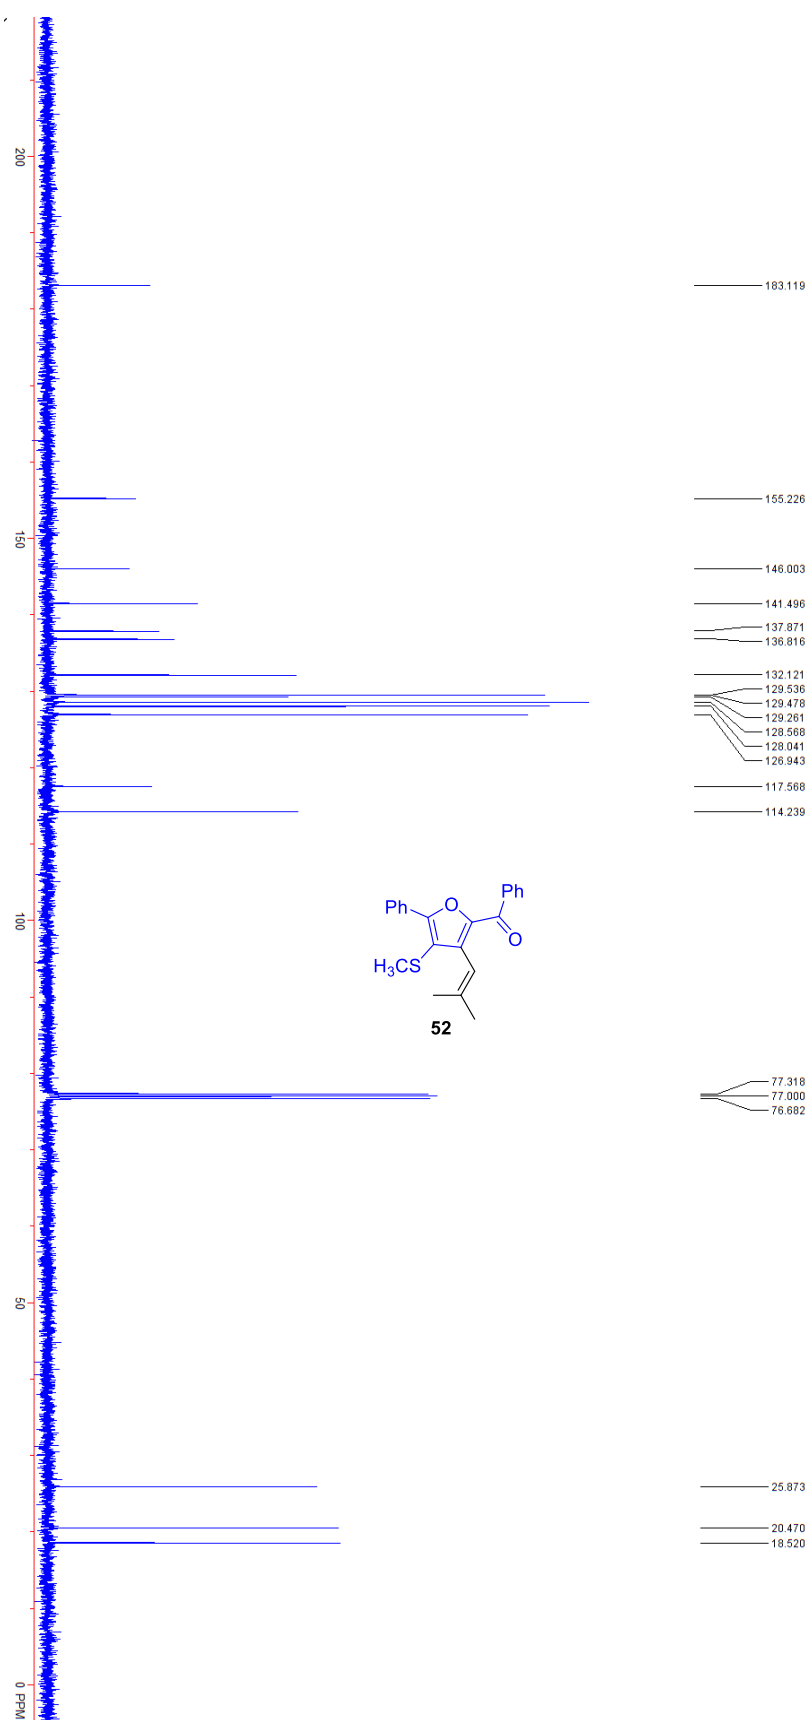

$^1\text{H}$  NMR spectrum of product **53** (400 MHz,  $\text{CDCl}_3$ )

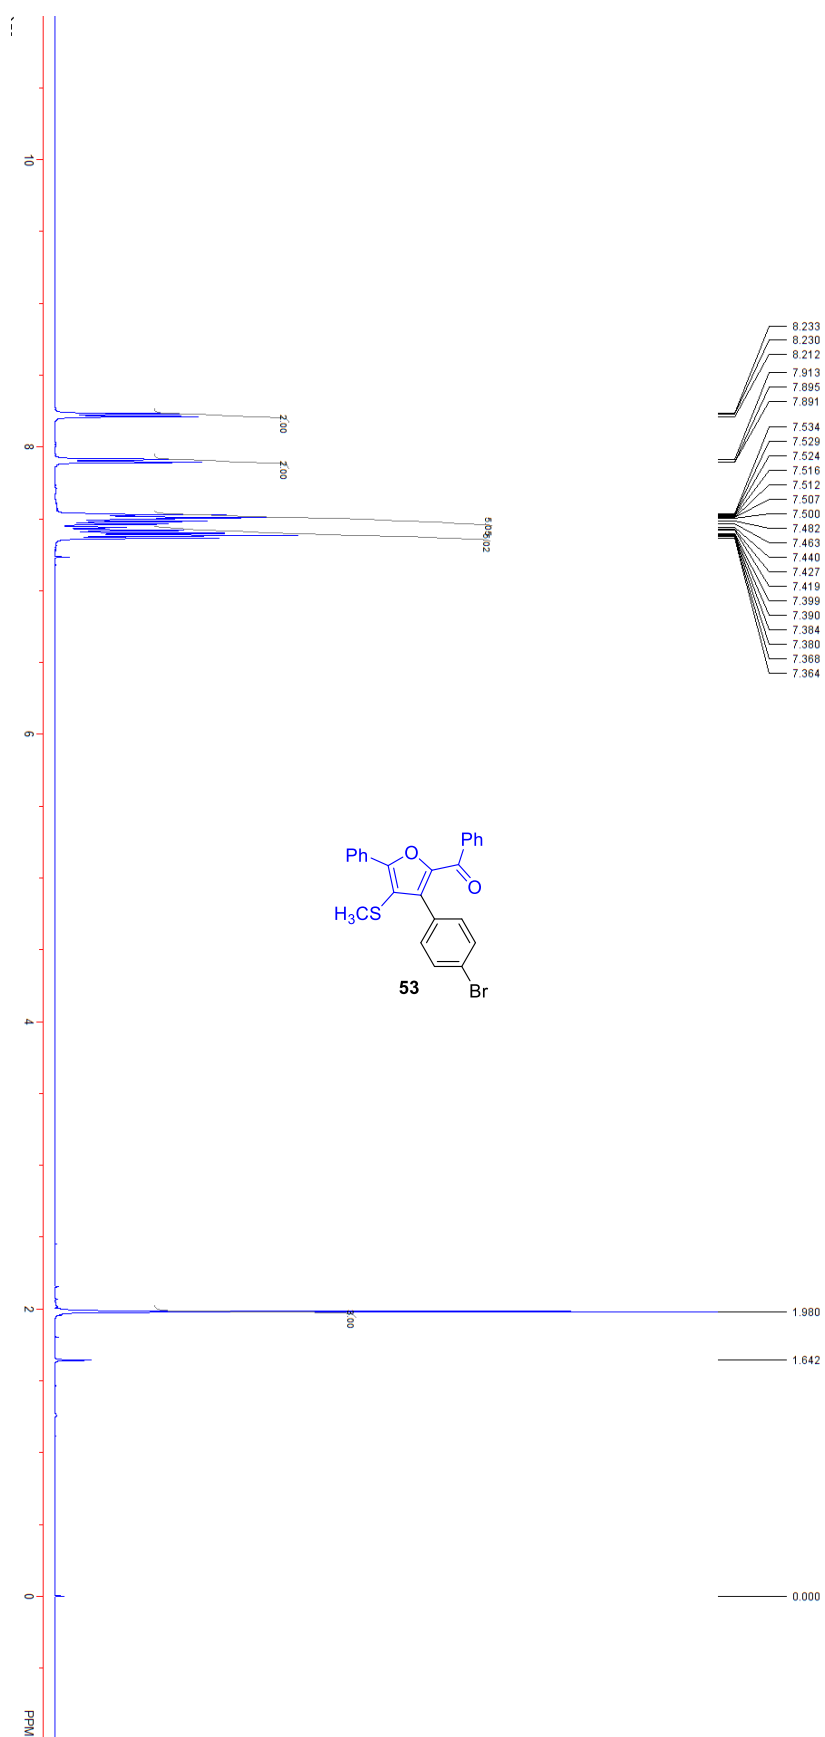

$^{13}\text{C}$  NMR spectrum of product **53** (100 MHz,  $\text{CDCl}_3$ )

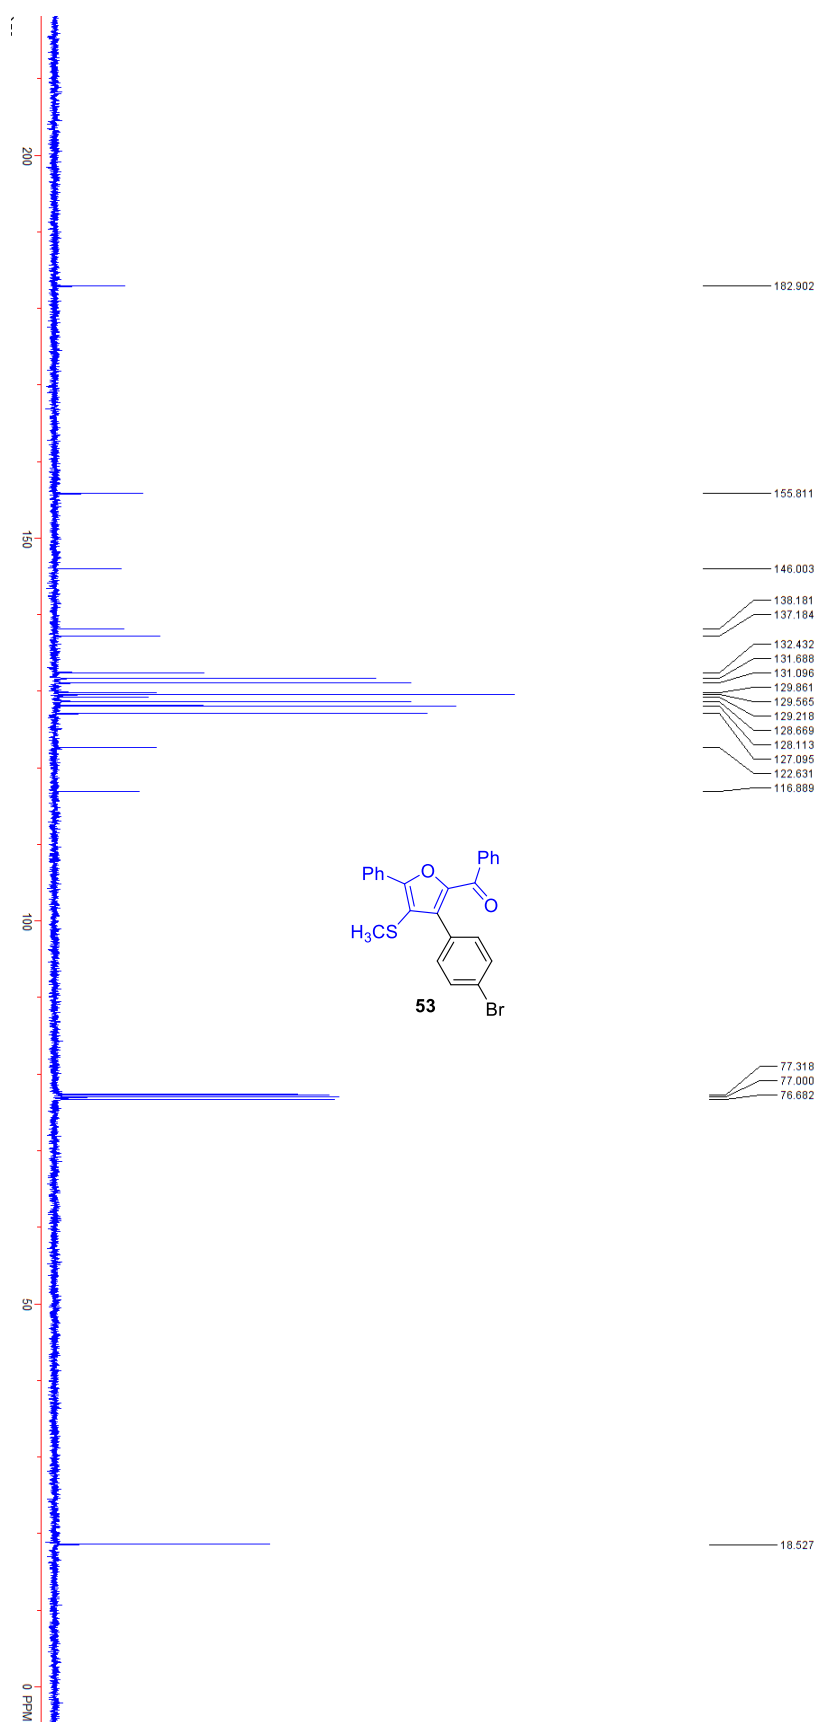

$^1\text{H}$  NMR spectrum of product **54** (400 MHz,  $\text{CDCl}_3$ )

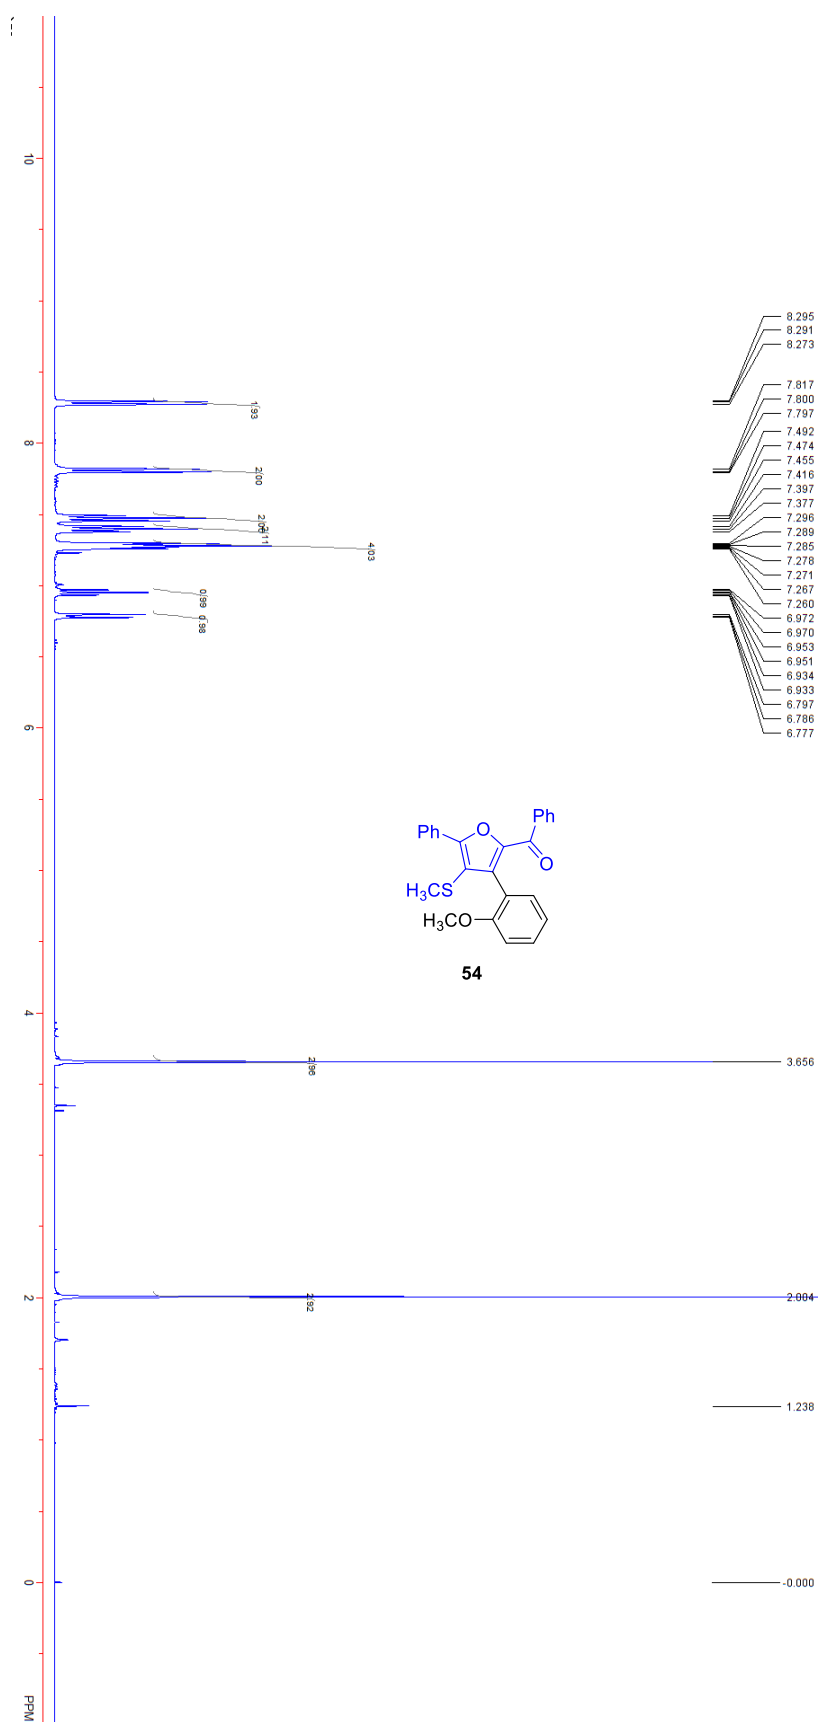

$^{13}\text{C}$  NMR spectrum of product **54** (100 MHz,  $\text{CDCl}_3$ )

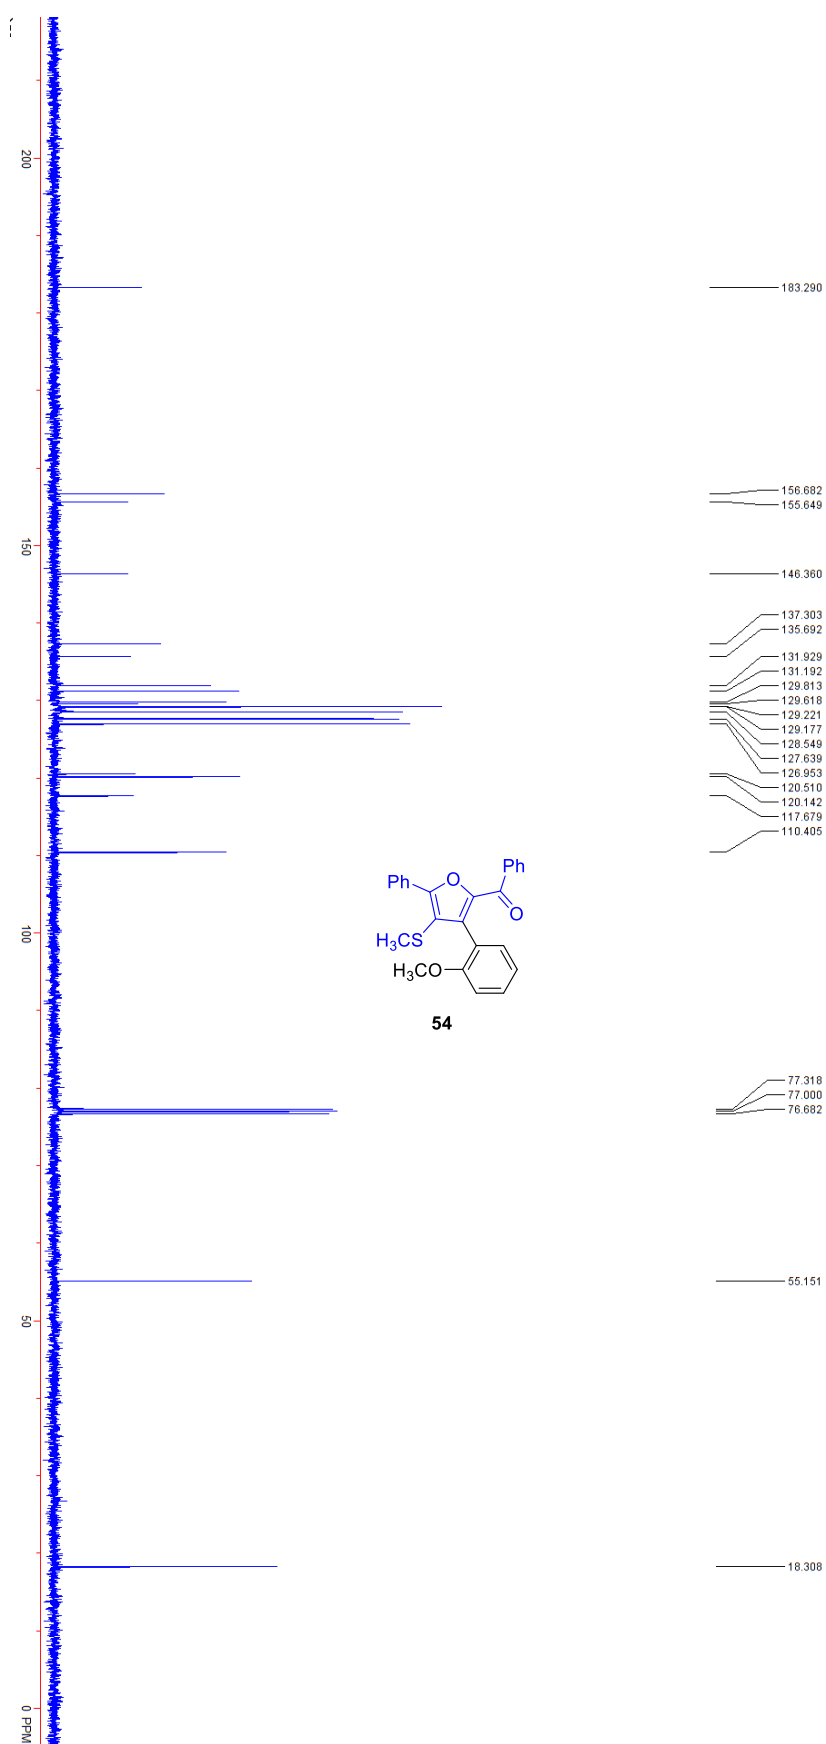

$^1\text{H}$  NMR spectrum of product **55** (400 MHz,  $\text{CDCl}_3$ )

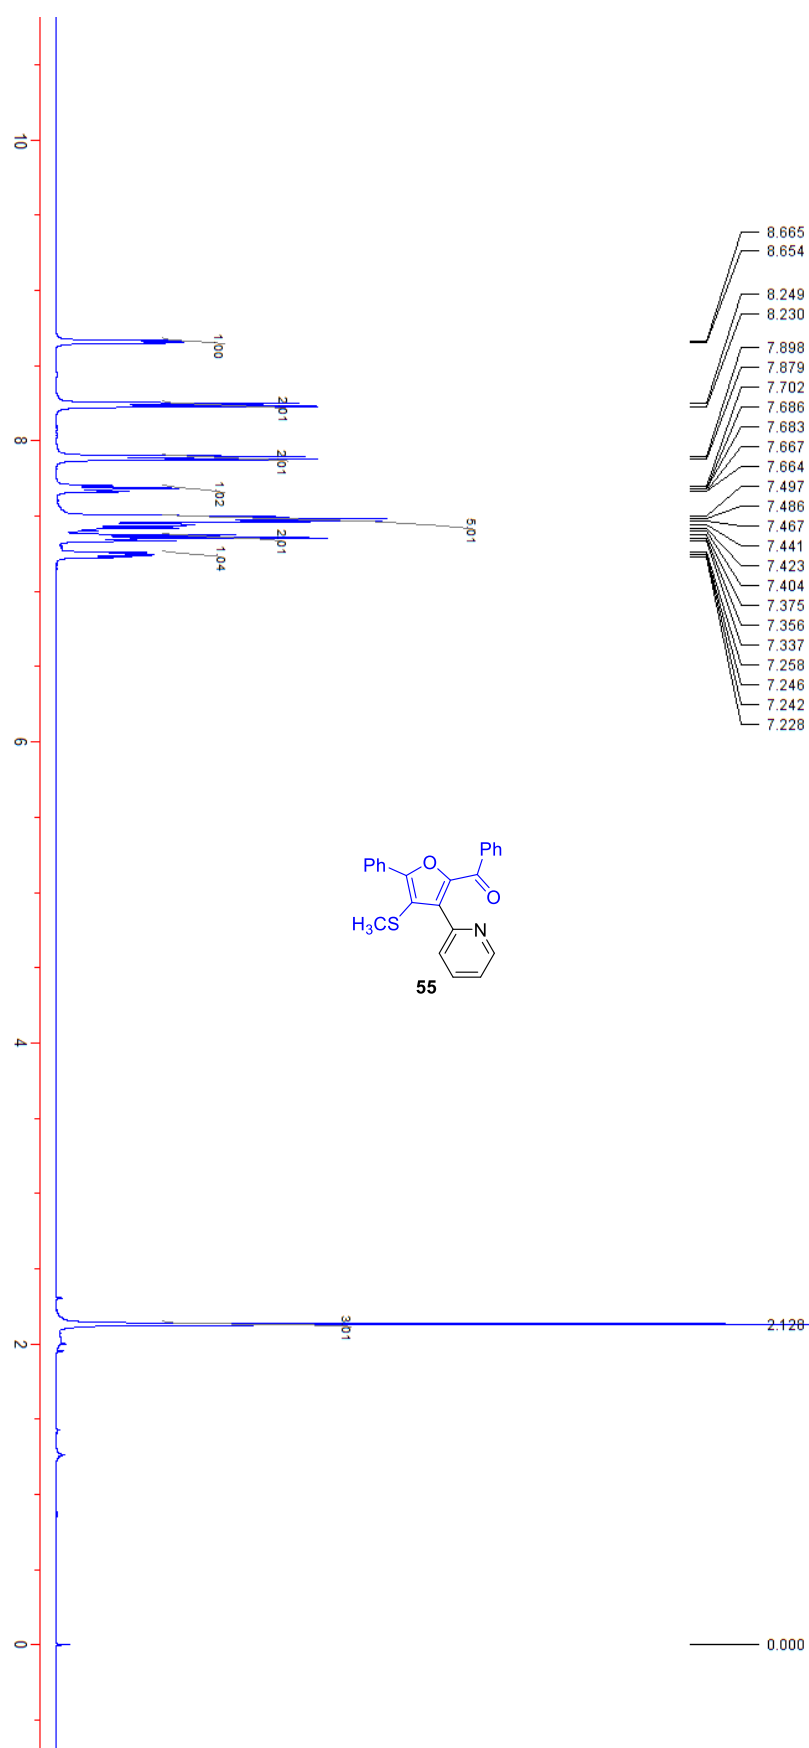

$^{13}\text{C}$  NMR spectrum of product **55** (100 MHz,  $\text{CDCl}_3$ )

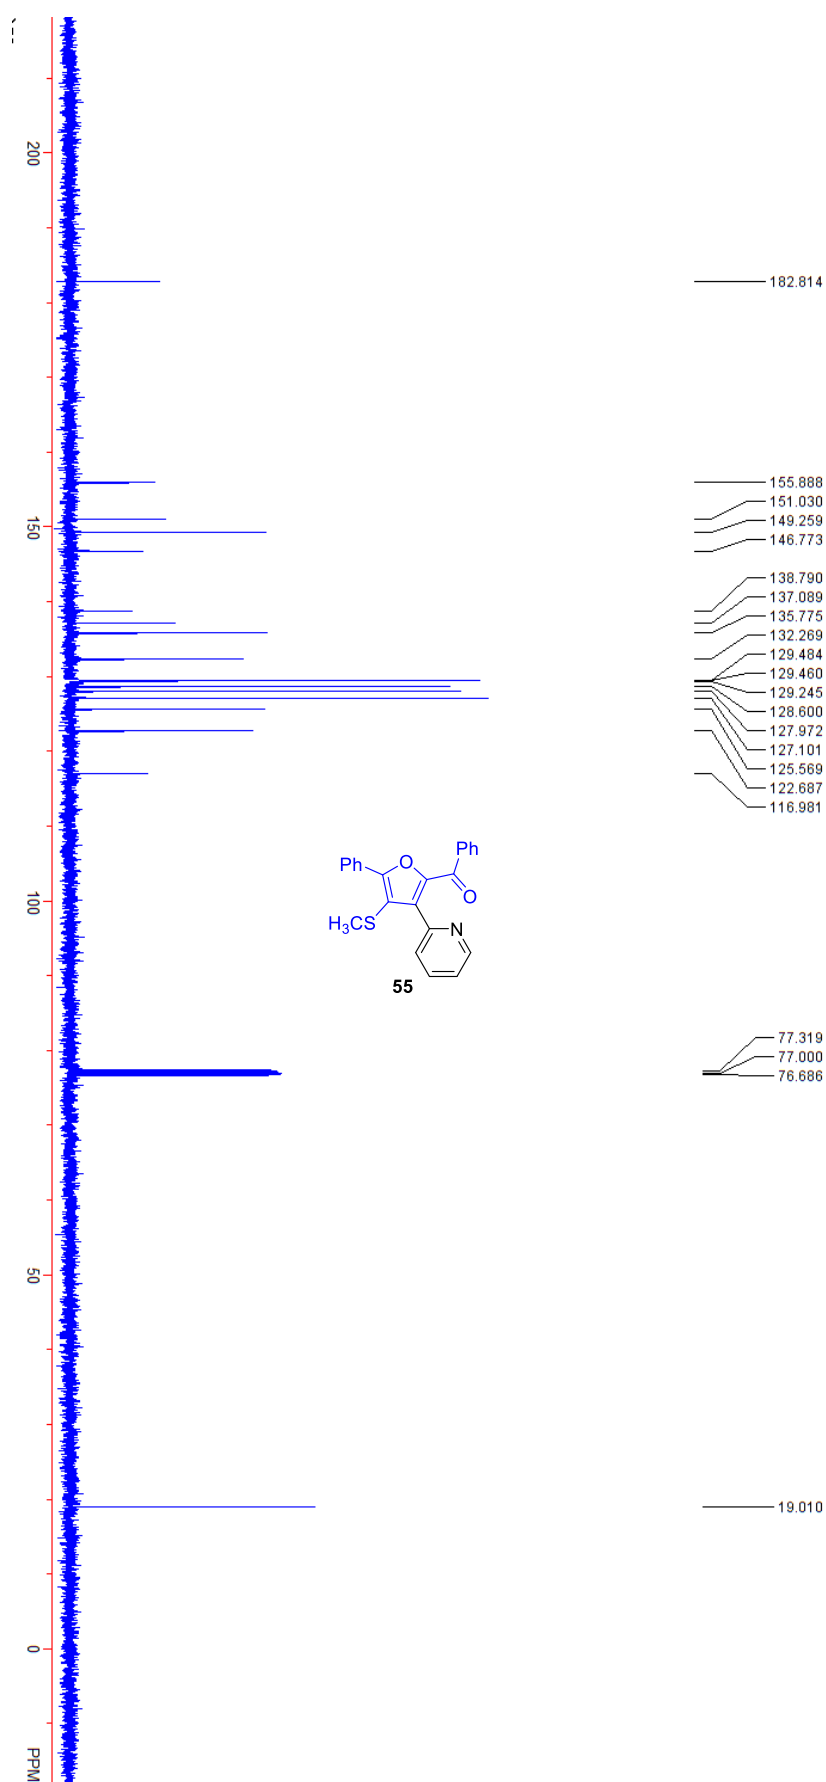

<sup>1</sup>H NMR spectrum of product **56** (400 MHz, CDCl<sub>3</sub>)

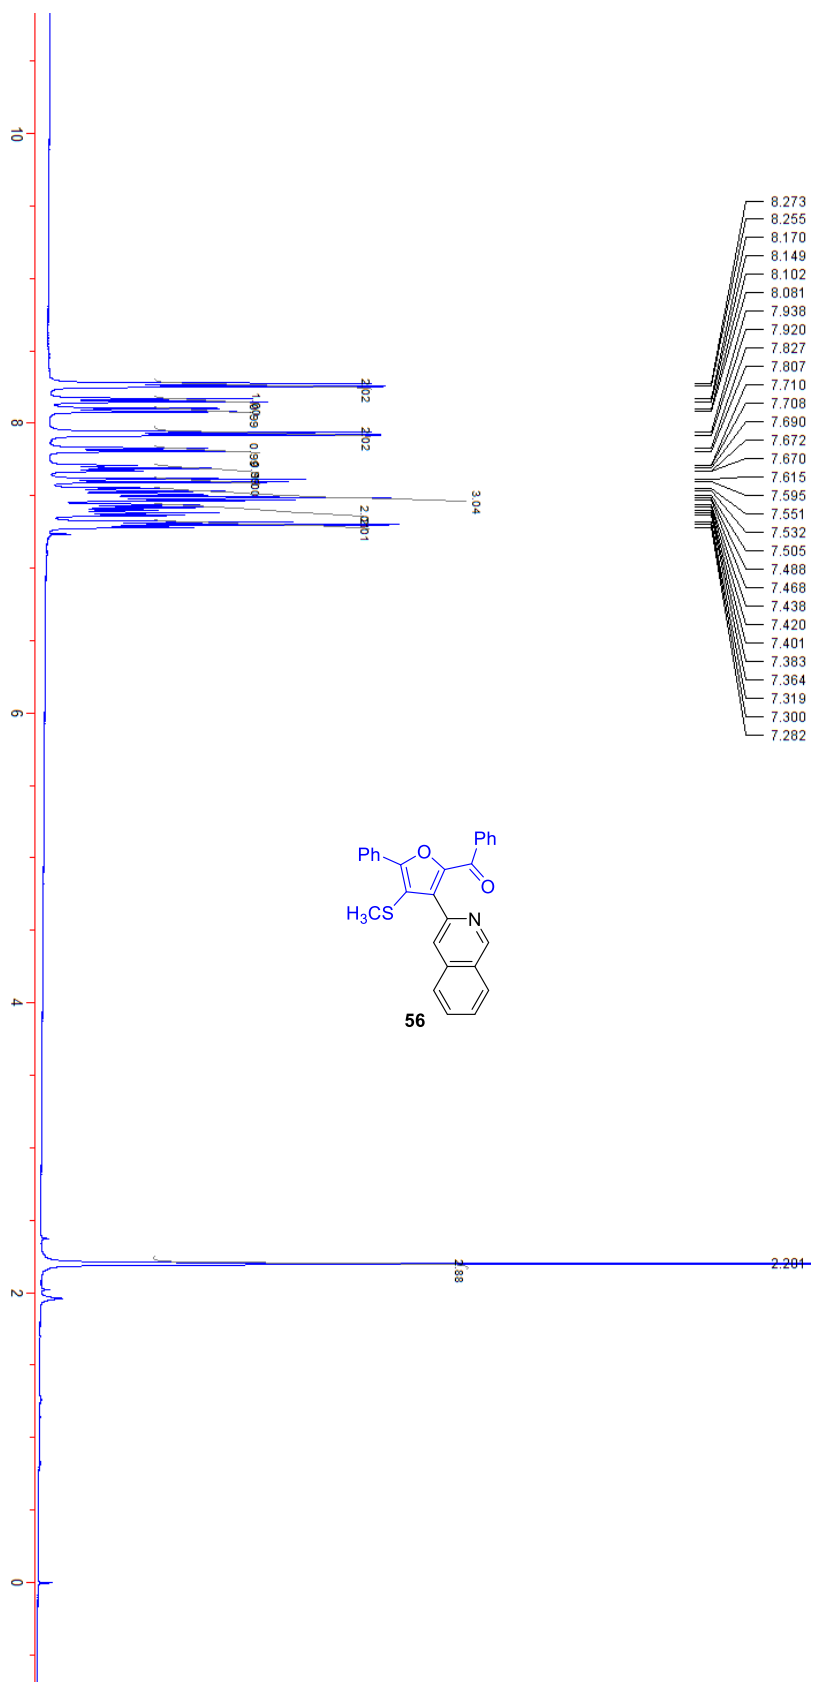



$^{13}\text{C}$  NMR spectrum of product **56** (100 MHz,  $\text{CDCl}_3$ )

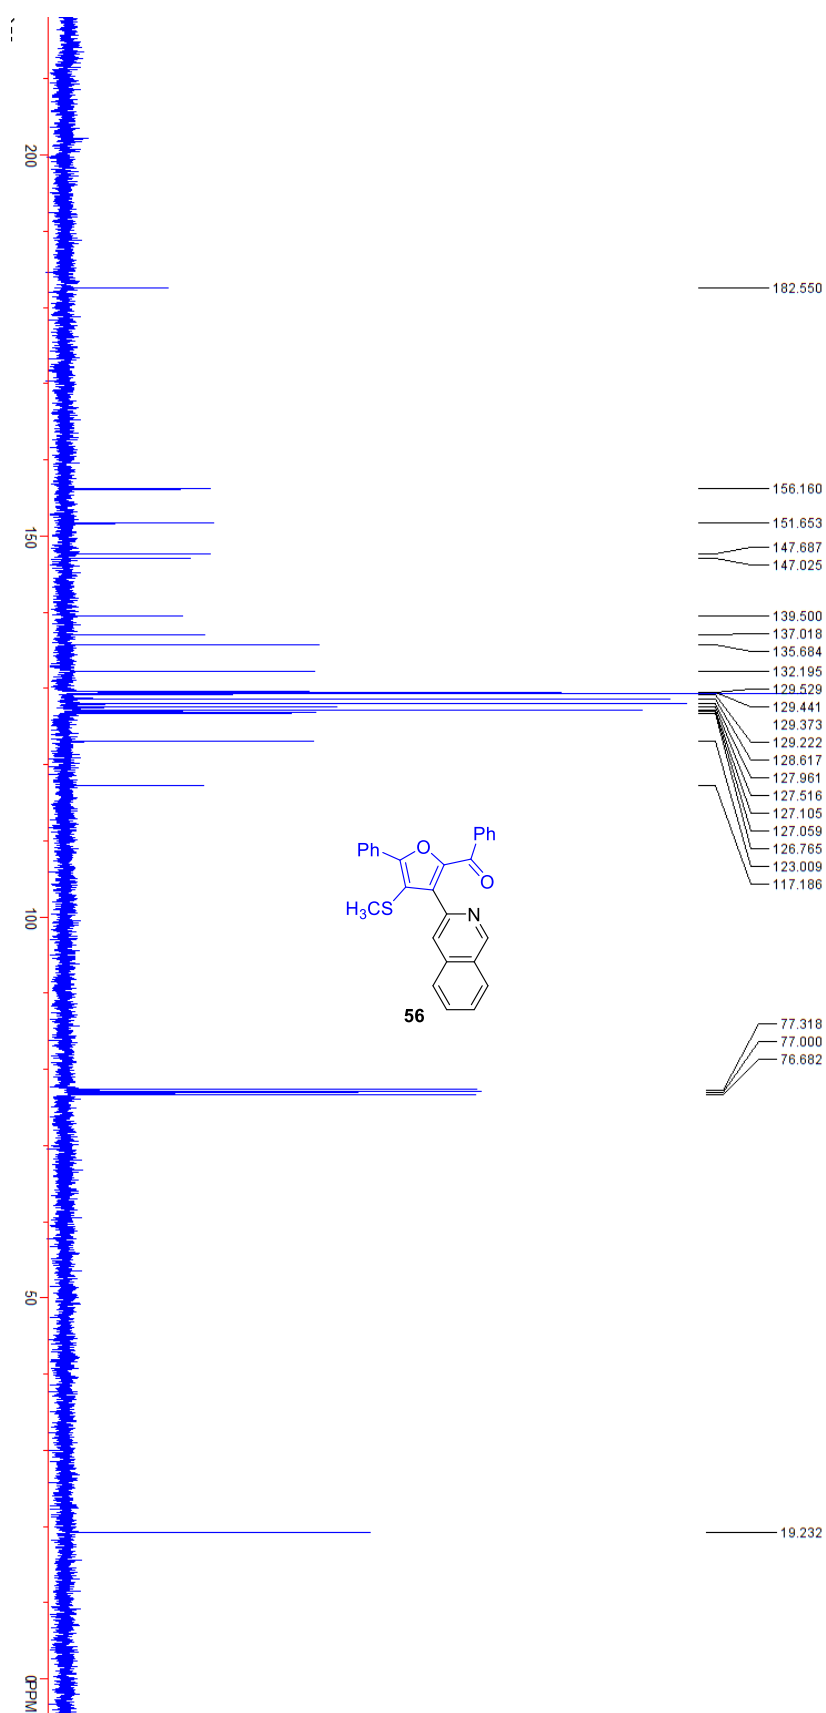

$^1\text{H}$  NMR spectrum of product **57** (400 MHz,  $\text{CDCl}_3$ )

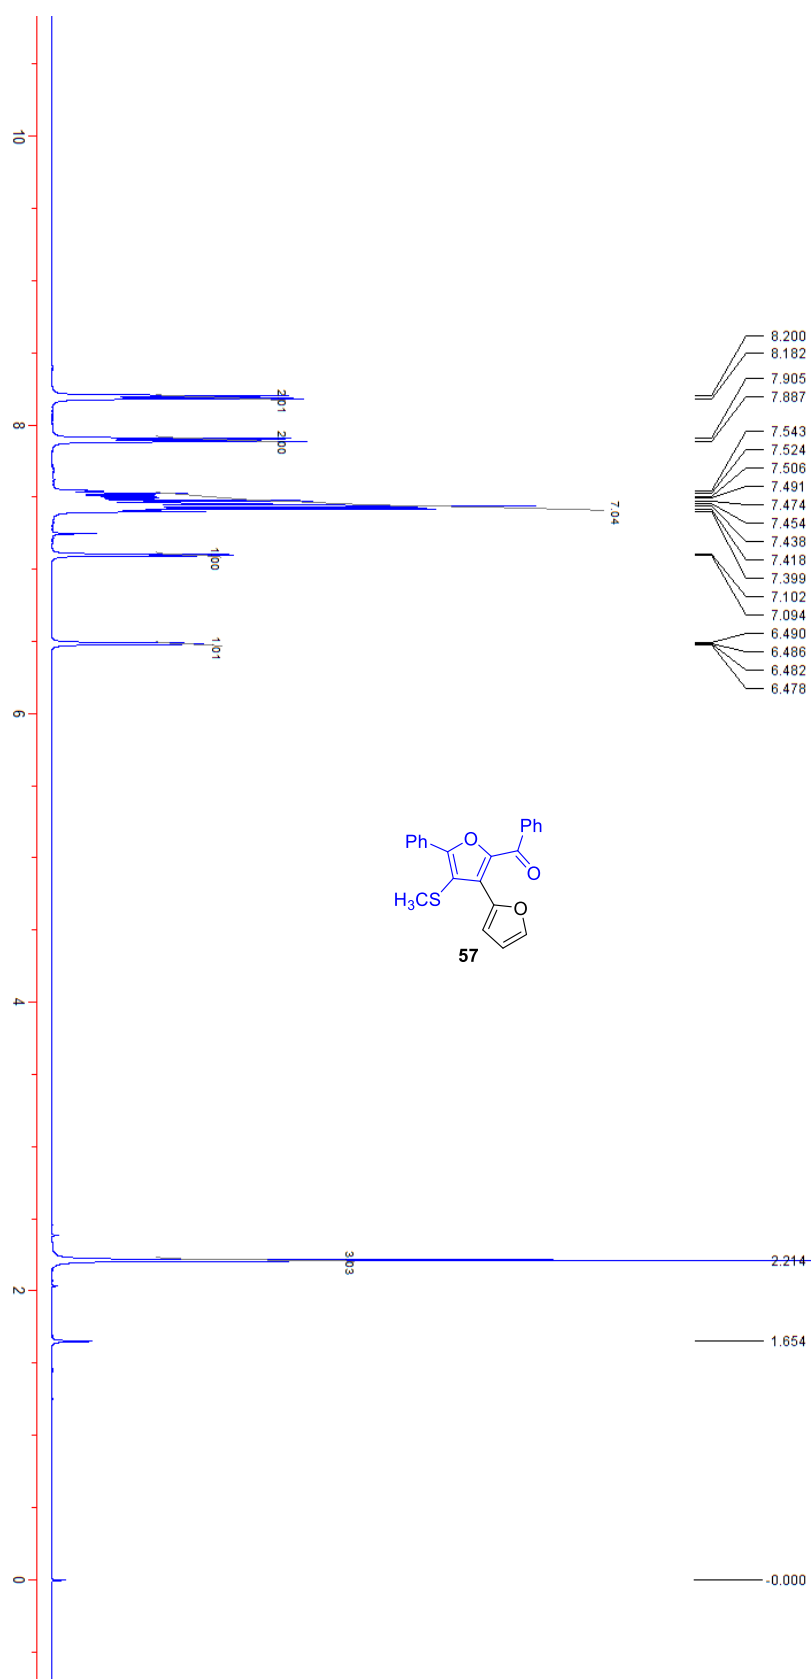

$^{13}\text{C}$  NMR spectrum of product **57** (100 MHz,  $\text{CDCl}_3$ )

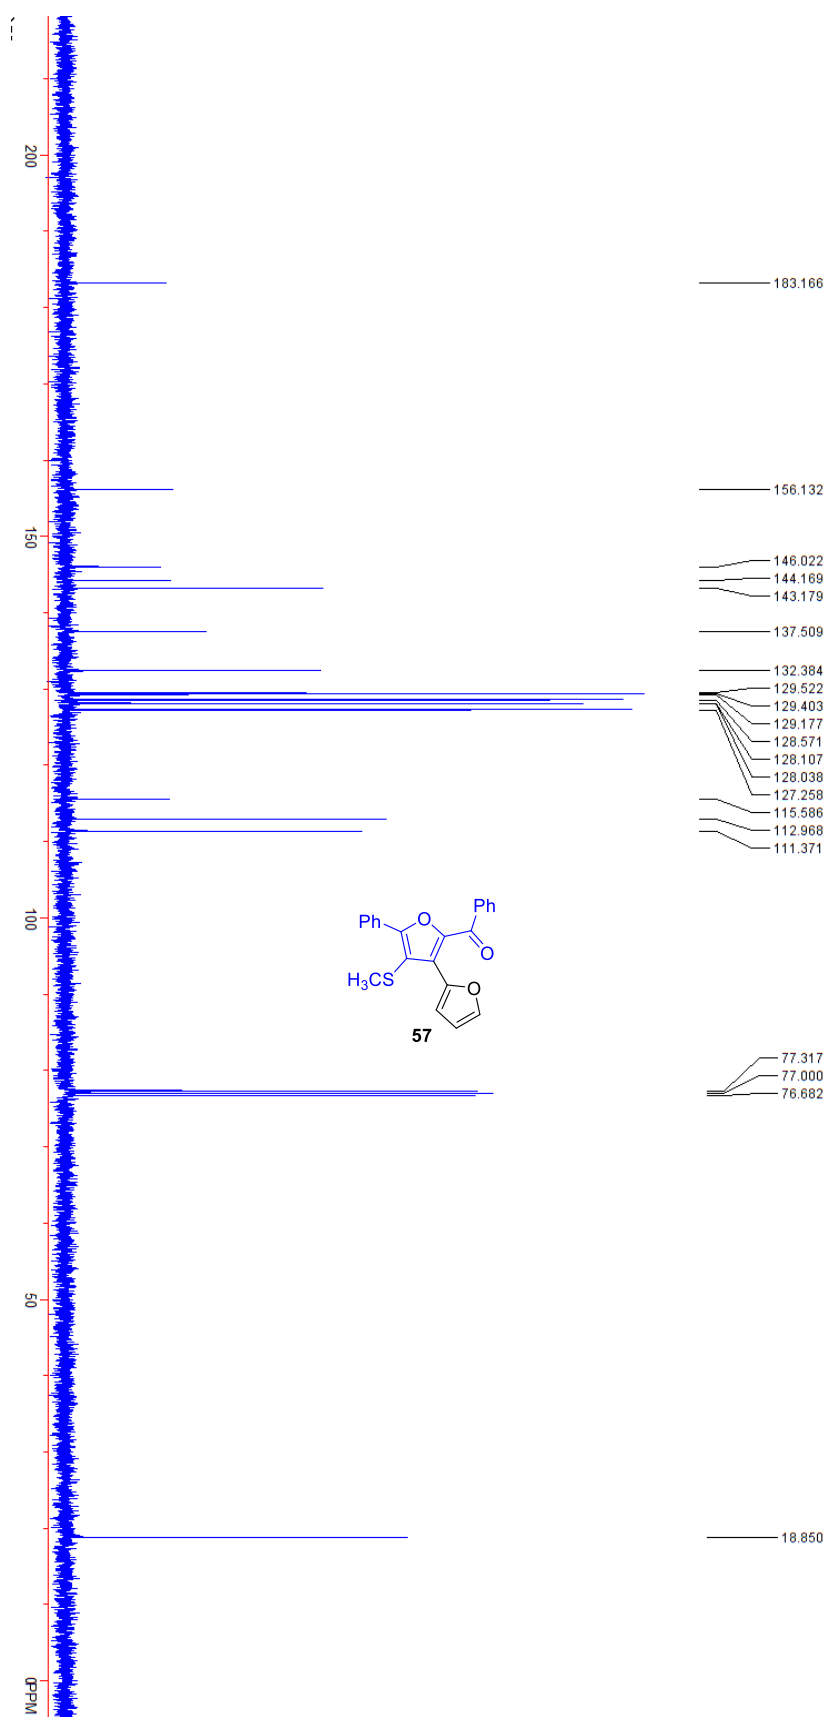

$^1\text{H}$  NMR spectrum of product **58** (400 MHz,  $\text{CDCl}_3$ )

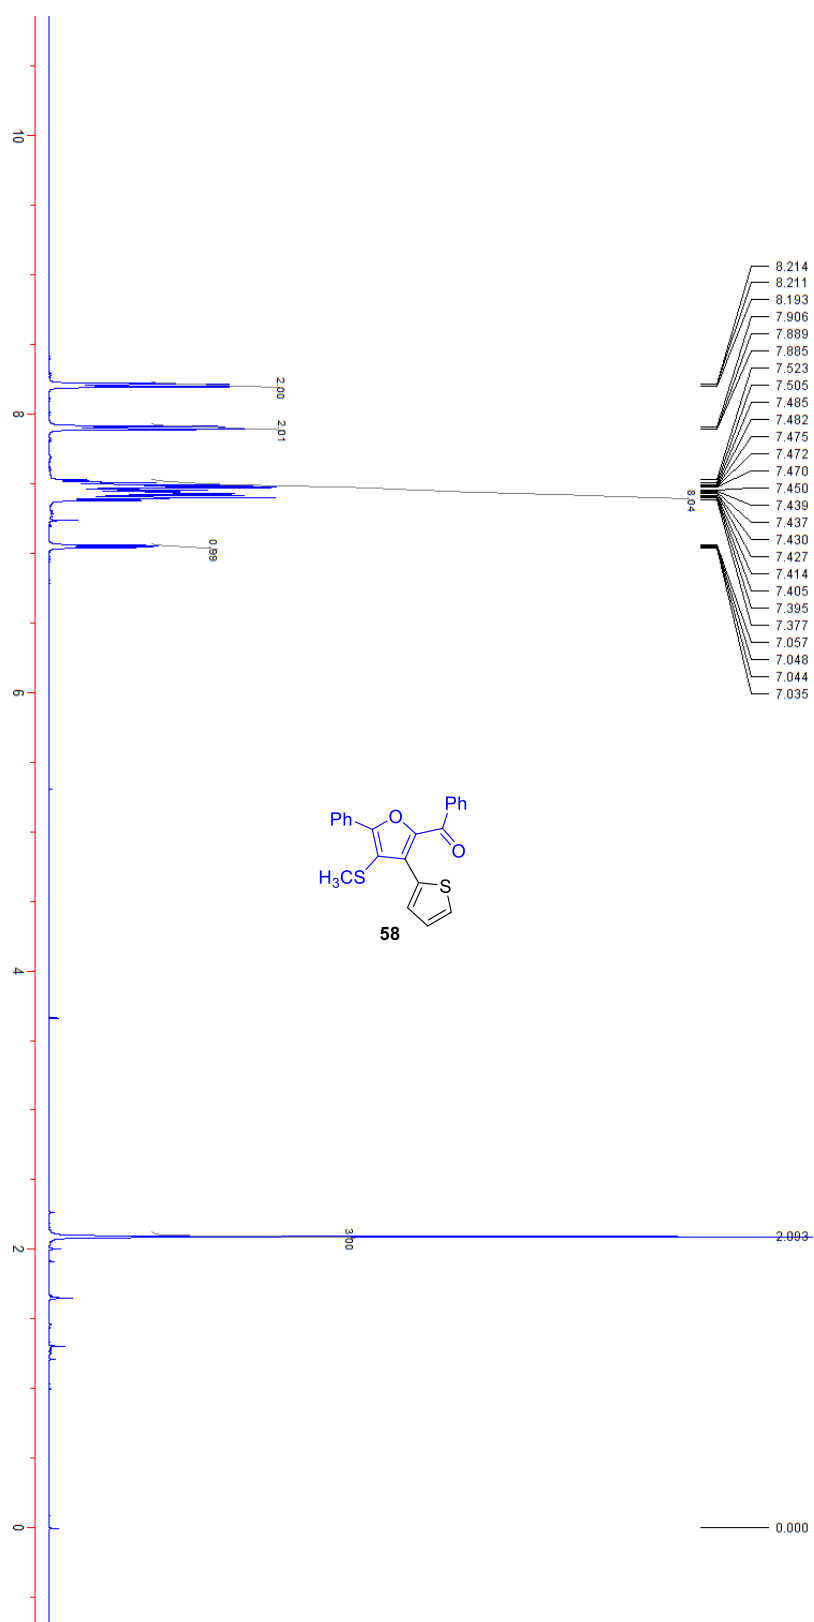

$^{13}\text{C}$  NMR spectrum of product **58** (100 MHz,  $\text{CDCl}_3$ )

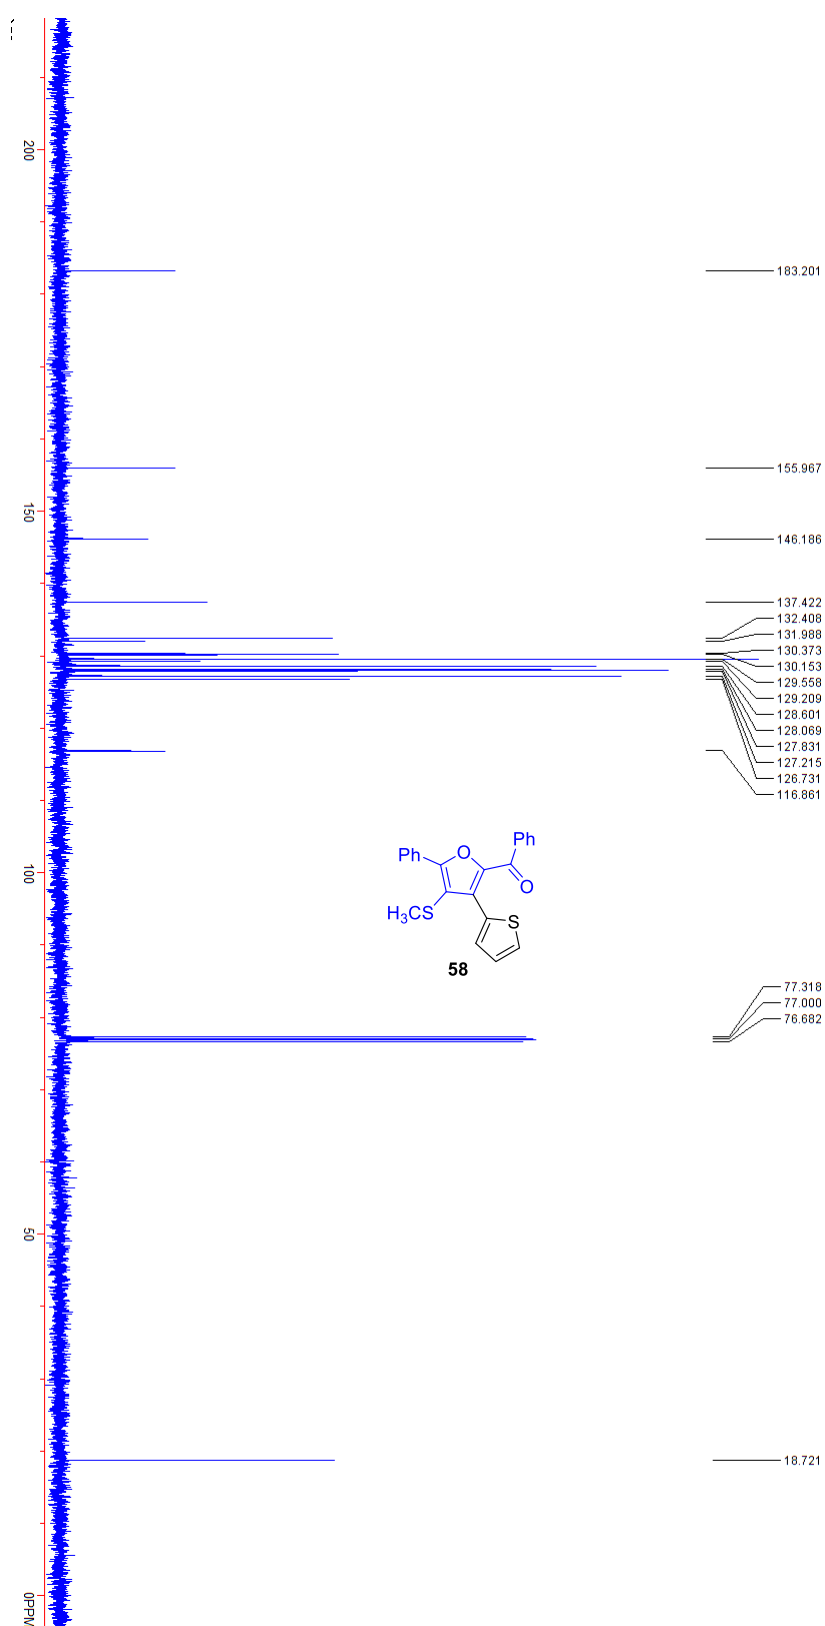

Supplement: d5cc06219e1.pdf [file d5cc06219e1.pdf]
